# Supplementary material for: Photoredox Catalytic α‐Alkoxypentafluorosulfanylation of α‐Methyl‐ and α‐Phenylstyrene Using SF6
Source: PubMed Central journal article supplement — Angew Chem Int Ed Engl. 2019 Nov 26;59(1):300–3. doi: 10.1002/anie.201910830 (PMC6973110; doi:10.1002/anie.201910830), 2019-11-26
Supplement: ANIE-59-300-s001.pdf [file ANIE-59-300-s001.pdf]

Supporting Information

**Photoredox Catalytic  $\alpha$ -Alkoxy-pentafluorosulfanylation of  $\alpha$ -methyl- and  $\alpha$ -phenylstyrene using SF<sub>6</sub>**

*David Rombach and Hans-Achim Wagenknecht\**

anie\_201910830\_sm\_miscellaneous\_information.pdf

## **Materials and Methods**

All chemicals were purchased from *Sigma Aldrich*, *Fluka*, *Alfa Aesar*, *ABCR* or *Tokyo Chemical Industry (TCI)*. The chemicals were used as received if not otherwise stated. Benchmark experiments were carried out using Acros Sureseal solvents. If the solvent was stored over molecular sieves the solvent prior to use was filtered by syringe filter to remove particles of residual molecular sieves.

NMR spectroscopic data was recorded using the following spectrometer hardware.

### *Bruker Ascend 500*

<sup>1</sup>H-NMR (500 MHz), <sup>13</sup>C-NMR-spectra (126 MHz), <sup>19</sup>F-NMR-Spektren (470 MHz).

### *Bruker Ascend 400*

<sup>1</sup>H-NMR (400 MHz), <sup>13</sup>C-NMR-spectra (100 MHz), <sup>19</sup>F-NMR-Spektren (376 MHz).

Chemical shifts of the <sup>1</sup>H-, <sup>13</sup>C- and <sup>19</sup>F-NMR spectra are reported in parts per million (*ppm*) relative to the solvent as an internal standard and was converted to the TMS-reference system by applying frequency correction using the values of Fulmer *et al.* [S<sup>1</sup>]. Routine <sup>13</sup>C-NMR spectroscopy was recorded while applying broadband <sup>1</sup>H-decoupling. The chemical shifts of <sup>19</sup>F-NMR experiments are reported relative to CCl<sub>3</sub>F as standard, which was added to the NMR sample. Coupling constants (J) are given in Hertz (*Hz*) and the multiplicity of signals are reported as followed: s (singlet), d (doublet), t (triplet), q (quadruplet), p (pentet), sext (sextet), m (multiplet), br. s (broad singlet), dt (doublet of triplets), td (triplet of doublets), dp (doublet of pentets), ddp (doublet of doublet of pentets).

The calculation of NMR-yields was carried out as follows. To the crude reaction mixture the standard was added in the following way. A mixture of 20 μL α,α,α-trifluorotoluene and 2000 μL acetonitrile was prepared. To the reaction mixture 200 μL of the stock solution was given and the mixture was vigorously shaken. Then a volume of ~

100  $\mu\text{L}$  of the resulting solution was transferred to an NMR tube and 300  $\mu\text{L}$  of  $\text{CDCl}_3$  was added.

The concentration in general was determined as follows: The ratio of integrals of the axial fluorine signal in the  $\text{SF}_5$  compound and the  $\text{CF}_3$  moiety of the standard was determined. The number of moles included in one reaction mixture was calculated as follows, dependent on the scale of reaction given in  $\text{mL}(V_0)$  with 0.200 mmol/mL. The volume of  $\alpha,\alpha,\alpha$ -trifluorotoluene in one shot ( $200 \mu\text{L}/\text{mL}(V_0)$ ) contained  $\{200 \mu\text{L}/\text{mL}(V_0)\} / (2020 \mu\text{L}) * 20 \mu\text{L}$   $\alpha,\alpha,\alpha$ -trifluorotoluene. This is 1.98  $\mu\text{L}/\text{mL}(V_0)$  of standard per batch. Calculation the mass using a density of 1.19  $\text{g}/\text{cm}^3$  (*Sigma Aldrich*) yields a number of moles of 0.0161 mmol/mL( $V_0$ ) experiment. The total number of moles in the tube was referenced against the internal standard integral. Routine NMR screenings to find best conditions were carried out applying a *zgpg30* pulse sequence, using  $D1 = 1\text{s}$ ,  $O1P = 0\text{ ppm}$ ,  $SW1 = 250\text{ ppm}$ . Integration of the signals was done separately to adjust the proper phase and get proper absolute integrals. Quantification of product concentrations was done using modified  $^{19}\text{F}$ -NMR Parameters. To ensure sufficient relaxation of the nuclei the  $D1$  time was modified to  $D1 = 5\text{ s}$ . We warmly thank Frau Pia Lang for their support with recording NMR spectra. Control experiments by preparative isolation of **9** as well as quantifying **8** by using an internal standard indicated a total accuracy of +/- 10% of the chosen quantification protocol for the model compounds **8**, **9** and **31**.

Irradiation of the photochemical reaction was carried out using a setup which was designed and manufactured by the University of Regensburg and the workshop of the Institute for Physical Chemistry at KIT Karlsruhe. We warmly thank Dieter Waltz and Klaus Stree for their kind support with manufacturing the irradiation hardware. High-power LEDs of the following types were used to irradiate the samples. 365 nm irradiation was applied using a *Nichia NVSU233A* LED. The temperature during the reaction time was controlled by using a *LAUDA Alpha R8* thermostat. (see Figure S1, right).

High resolution mass spectrometry was performed on a *Finnigan Modell MAT 95* using an electron impact ionization source. GC/MS coupling was recorded by using a

Varian 431 GC using a capillary column *FactorFour<sup>TM</sup> VF-5 ms* (30 m × 0.25 mm × 0.25 μm) and a *Varian 210* ion trap mass detector or using a *Agilent Technologies 6890N* GC coupled to a *Agilent Technologies 5975B VL MSD* mass detector. Thin layer chromatography was performed using *Fluka silica gel 60 F254* coated aluminum foil. Flash chromatography was carried out on silica gel 60 supplied by *Sigma Aldrich* (43-60 μm). GC-FID quantification was performed using a *Bruker-430 GC* and a *FactorFour<sup>TM</sup> VF-5 ms* (30 m × 0,25 mm × 0,25 μm) stationary phase against trifluorotoluene as internal standard.

Small quantities of products were purified using a glass pipet or conventional column chromatography glassware. High purity grade solvents were used for purification of the characterized compounds. Sulfur hexafluoride was purchased from *Linde* in high purity grade (5.0). The gas was not further purified before use. Gas volumes were dosed using a four-necked glass cylinder of a volume of 68 mL (including tube) to control the amount of gas applied to the reaction mixture. The reaction was carried out using precisely manufactured glass tubes sealed with a Young-type screwing valve.

Single crystals of C<sub>15</sub>H<sub>15</sub>F<sub>5</sub>OS (**9**) were colorless needles and have been grown by crystallization from water/acetonitrile. A suitable crystal was selected, and the crystal was mounted on a MITIGEN holder in perfluoroalkylether oil on a Stoe IPDS II diffractometer. The crystal was kept at 200 K during data collection. Using Olex2<sup>[S2]</sup>, the structure was solved with the ShelXT<sup>[S3]</sup> structure solution program using Intrinsic Phasing and refined with the ShelXL<sup>[S4]</sup> refinement package using Least Squares minimisation. We kindly thank M. Sc. Bernhard Birenheide and Prof. Dr. Frank Breher for solving the crystal structure of **9**.

## Gas measure apparatus and calculation of pressure inside the reaction vessels

Sulfur hexafluoride is known not being able to be described by the ideal gas model due to non-negligible intermolecular interactions. Therefore, the *van-der-Waals* equation<sup>[S5]</sup> has to be used to calculate the pressure inside of the reaction vessel. The van-der-Waals coefficients were used as reported to be  $a = 0.7857 \text{ Pa m}^6 \text{ mol}^{-2}$  and  $b = 8.79 \cdot 10^{-5} \text{ m}^3 \text{ mol}^{-1}$ .<sup>[S6]</sup>

$$p + \left( \frac{n^2 a}{V^2} \right) * (V - n * b) = n * R * T$$

The calculation of the pressure inside the reaction vessels using 1 volume of gas measure glassware is as follows. The relevant volumes were

$V(\text{gas dosage apparatus}) = 68 \text{ mL}$

$V(\text{Youngvalve-Tube}) = 26 \text{ mL}$

Spring loaded overpressure valve is equipped with spring for building up 1.1 bar or 0.1 bar overpressure. Therefore, the pressure of  $\text{SF}_6$  in tube under standard conditions (0.200 mmol scale) is calculated by solving the van-der-Waals equation.

The resulting number of moles was calculated to be

$$n = 3.01 \text{ mmol}$$

For standard reaction a Young-valve tube was used fitting a volume of 26 mL. These tubes were sealed using a Teflon screw. Therefore the pressure inside the vessel was calculated to be

$$p(26\text{mL}) = \mathbf{2.8 \text{ bar}}$$

The upscaling reactions (1.00 mmol) were carried out using two volumes of the apparatus with 6.10 mmol resulting in a pressure of the vessel of 5.5 bar. The amount of gas used

for the reactions was measured using a glass cylinder having four ground glass joints connected to (i) a Schlenk line, (ii) the gas cylinder, (iii) an overpressure valve and (iv) to a tubing going to the reaction mixture containing Young-type tube (Figure S1, left). After degassing the reaction mixture by freeze-pump-thaw the whole reaction setup including the reaction tube was evacuated after freezing the reaction mixture at  $-196^{\circ}\text{C}$ . Then valves **V5** and **V1** were closed. After refilling the apparatus with  $\text{SF}_6$  until the overpressure valve indicated a pressure of 1.1 bar valve **V3** and **V2** have been closed. The remaining gas containing volume of the glass cylinder and the tubing (connecting **V4** and **V5**) was measured to be 68 mL. Now valve **V5** was open to sublime the measured gas volume into the reaction tube at  $-196^{\circ}\text{C}$ . Finally, the reaction tube was sealed and was let come to room temperature.

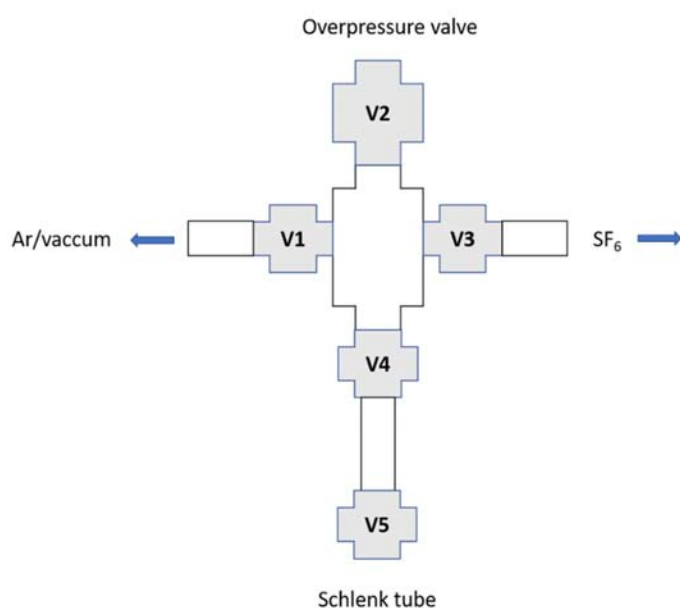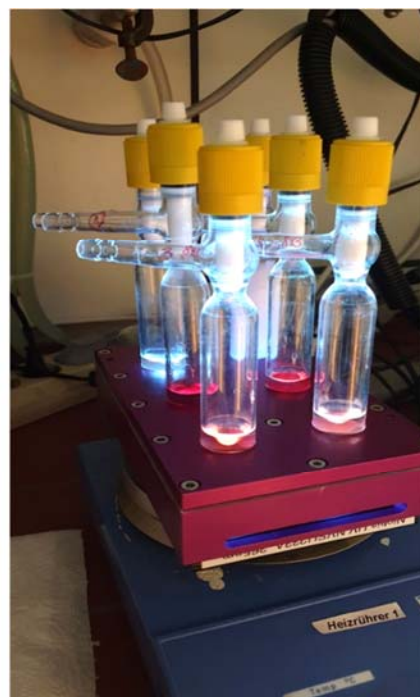

**Fig. S1**

Left: Scheme of the gas measure apparatus. Right: Setup for irradiation of the samples by high-power LEDs under stirring and temperature control.

High power LED-emission spectra

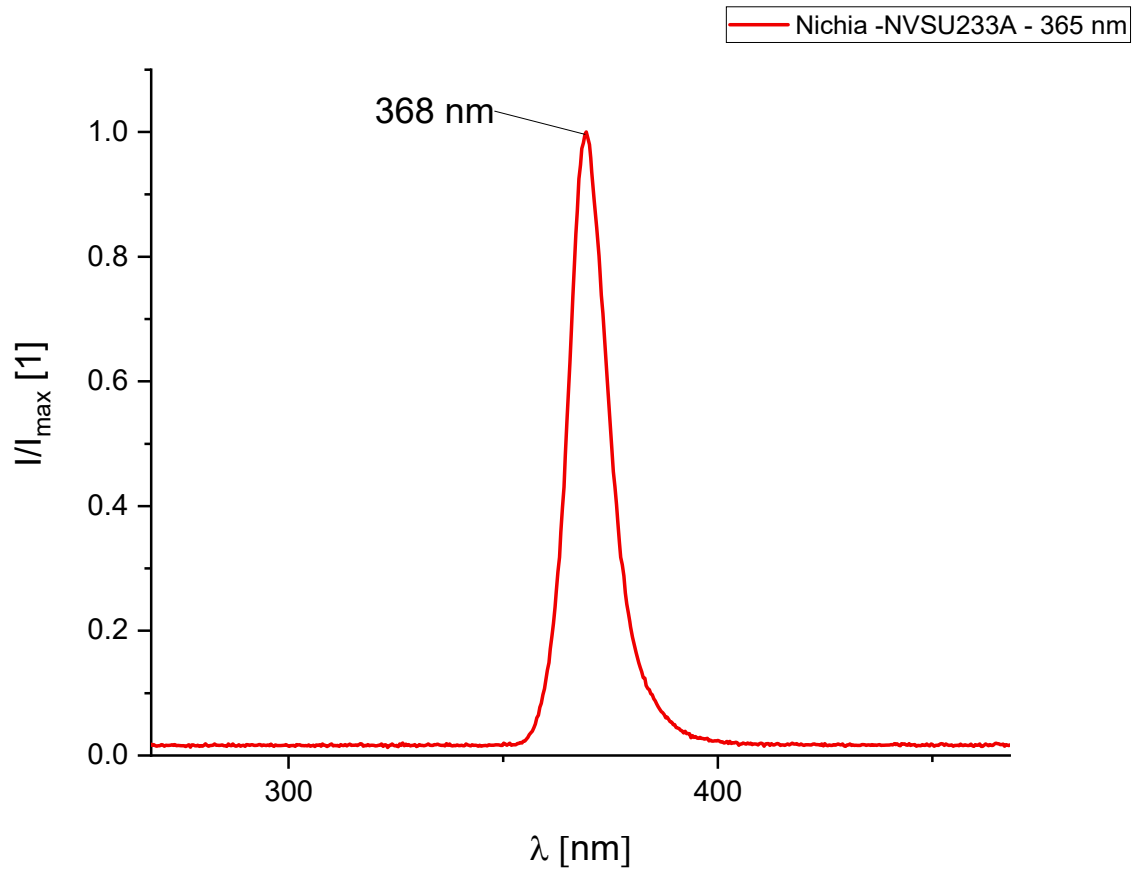

**Fig. S2**

LED emission spectra of Nichia NVSU233A ( $\lambda_{\max, \text{supplier}} = 365$  nm).

## Experimental part

### Preparation of the catalysts

Photoredox catalyst **3** was prepared by Buchwald-Hartwig coupling starting from phenothiazine and bromobenzene as described previously.<sup>[S7,S8]</sup> NMR data given below.

### Preparation of $\alpha$ -alkoxy-pentafluorosulfonyl compounds **8** and **9** and **12** to **32**.

General procedure A: Preparation of open chain  $\alpha$ -alkoxy-pentafluorosulfonyl compounds.

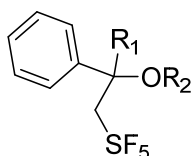

In a Young-type glass tube 0.20 mmol (1.00 eq.) of the alkene were added to 1 mL of acetonitrile (Sureseal grade stored over molecular sieves, filtered). Then 2.00 mmol (10.0 eq.) of the alcohol as well as 5.50 mg (0.02 mmol, 10 mol%) of the photoredox catalyst **3** were added. Finally, 20  $\mu$ L (0.02 mmol, 10 mol%) of  $BEt_3$  (1.0 M in hexanes) were added to the reaction mixture. The reaction mixture was degassed by three freeze-pump-thaw cycles and was refilled with sulfur hexafluoride (2.8 bar, 15 eq.). The reaction mixture was stirred at room temperature under irradiation at 368 nm by a high-power LED at 20 °C for 22 h. The yield was determined by  $^{19}F$ -NMR spectroscopy using  $\alpha,\alpha,\alpha$ -trifluorotoluene as an internal standard. The compounds were purified by means of column chromatography using silica as stationary phase and dichloromethane in hexanes as eluent.



General procedure B: Preparation of cyclic  $\alpha$ -alkoxy-pentafluorosulfanyl compounds.

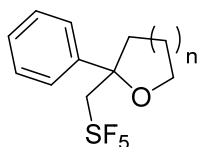

In a Young-type glass tube 0.33 mmol (1.00 eq.) of the alkenol were added to 1 mL of acetonitrile (Sureseal®, filtered). Then 5.50 mg (0.02 mmol, 6 mol%) of the photoredox catalyst **3** were added. Finally, 20  $\mu$ L (0.02 mmol, 6 mol%) of  $\text{BEt}_3$  (1.0 M in hexanes) were added to the reaction mixture. The reaction mixture was degassed by three freeze-pump-thaw cycles and was refilled with sulfur hexafluoride (2.8 bar, 15 eq.). The reaction mixture was stirred at room temperature under irradiation at 368 nm by a high-power LED at 20 °C for 22 h. The yield was determined by  $^{19}\text{F}$ -NMR spectroscopy using  $\alpha,\alpha,\alpha$ -trifluorotoluene as an internal standard. The compounds were purified by means of column chromatography using silica as stationary phase and dichloromethane in hexanes as eluent.

#### Individual experimental procedures

The assignment of NMR  $^1\text{H}$ -,  $^{13}\text{C}$ - and  $^{19}\text{F}$ -NMR resonances was done by analysis of  $^1\text{H}$ ,  $^{13}\text{C}$ ,  $^{19}\text{F}$ -1D NMR spectra as well as 2D-experiments as far as necessary. Therefore in general  $\text{HSQC}_{\text{ed}}$ , HMBC, COSY or advanced experiments have been run on the compounds.

### Pentafluoro-(2-methoxy-2,2-diphenylethyl)- $\lambda^6$ -sulfane (9)

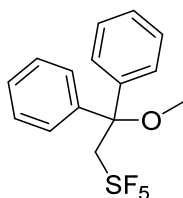

C<sub>15</sub>H<sub>15</sub>F<sub>5</sub>OS  
338,0764

The compound was prepared according to a modified *general procedure A* using 20 mol% BEt<sub>3</sub>. In a Young-type reaction tube 35.3  $\mu$ L (0.200 mmol, 1.00 eq.) of diphenylethylene **2** as well as 81.1  $\mu$ L (64.1 mg, 2.00 mmol, 10.0 eq.) of MeOH and 40  $\mu$ L (0.040 mmol, 20 mol%) of BEt<sub>3</sub> in hexanes (1 M) were used. The compound was purified by column chromatography (silica, 5% DCM in cyclohexane). The yield of the product was determined by analyzing the crude reaction mixture by means of GC-FID (53%). The product was obtained as colorless solid.

**Scale-up:** The reaction was also run on a 1.00 mmol scale using the *general procedure A* using 5.5 bar of SF<sub>6</sub> (6.0 eq.). The yield was 45% determined by NMR spectroscopy (40% isolated yield).

**<sup>1</sup>H NMR** (500 MHz, Chloroform-*d*)  $\delta$  7.33 – 7.28 (m, 8H, ArH), 7.26 – 7.22 (m, 2H, ArH), 4.72 (p, *J* = 7.9 Hz, 2H, CH<sub>2</sub>-SF<sub>5</sub>), 3.18 (s, 3H, CH<sub>3</sub>).

**<sup>13</sup>C NMR** (126 MHz, Chloroform-*d*)  $\delta$  142.90 (C<sub>q,Ar</sub>), 128.37 (CH<sub>Ar</sub>), 127.52 (CH<sub>Ar</sub>), 126.60 (CH<sub>Ar</sub>), 81.34 (C<sub>q,bridge</sub>), 74.80 (p, *J* = 10.7 Hz, CH<sub>2</sub>SF<sub>5</sub>), 51.36 (OCH<sub>3</sub>).

**<sup>19</sup>F NMR** (471 MHz, Chloroform-*d*)  $\delta$  84.36 (p, *J* = 148 Hz, 1F, F<sub>ax</sub>), 71.89 (dt, *J* = 149, 8.1 Hz, 4F, F<sub>eq</sub>).

**HR-EI-MS** *m/z* (calc.) = 338.0764 [M<sup>+</sup>]; *m/z* (found) = 338.0765 [M<sup>+</sup>] (C<sub>15</sub>H<sub>15</sub>F<sub>5</sub>OS).

**Pentafluoro-(2-((2-methylallyl)-oxy)-2,2-diphenylethyl)- $\lambda^6$ -sulfane (10)**

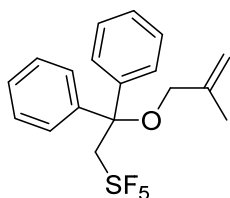

$C_{18}H_{19}F_5OS$   
378,1077

The compound was prepared according to general procedure A. In a Young-type reaction tube 35.3  $\mu$ L (0.200 mmol, 1.00 eq.) of diphenylethylene **2** as well as 168  $\mu$ L (144 mg, 2.00 mmol, 10.0 eq.) of 2-methyl-2-propen-1-ol were used. The compound was purified by column chromatography (silica, 5% DCM in hexanes, TLC:  $R_f$  = 0.3). The yield of the product was determined by analyzing the crude reaction mixture by means of  $^{19}F$ -NMR spectroscopy (26%). The product was obtained as colorless solid.

**$^1H$  NMR** (500 MHz, Chloroform-*d*)  $\delta$  7.38 – 7.28 (m, 8H), 7.27 – 7.21 (m, 2H), 5.21 – 5.01 (m, 1H), 4.90 (p,  $J$  = 1.3 Hz, 1H), 4.73 (p,  $J$  = 7.8 Hz, 2H), 3.65 (s, 2H), 1.75 (t,  $J$  = 1.2 Hz, 3H).

**$^{13}C$  NMR** (126 MHz, Chloroform-*d*)  $\delta$  142.86 ( $C_{q,Ar}$ ), 141.79 ( $C_{q,vinyl}$ ), 128.37 ( $CH_{Ar}$ ), 127.62 ( $CH_{Ar}$ ), 126.76 ( $CH_{Ar}$ ), 111.51 ( $CH_{2,vinyl}$ ), 81.02 ( $C_{q,Bridge}$ ), 75.91 ( $CH_2SF_5$ ), 67.08 ( $CH_2O$ ), , 19.99 ( $CH_3$ ).

**$^{19}F$  NMR** (471 MHz, Chloroform-*d*)  $\delta$  84.31 (p,  $J$  = 150 Hz, 1F,  $F_{ax}$ ), 72.07 (dt,  $J$  = 149, 8.1 Hz, 4F,  $F_{eq}$ ).

**HR-EI-MS**  $m/z$  (calc.) = 378.1077 [ $M^{+}$ ];  $m/z$  (found) = 378.1079 [ $M^{+}$ ] ( $C_{18}H_{19}F_5OS$ ).

**Pentafluoro-(2-(pent-3-yn-1-yloxy)-2,2-diphenylethyl)-λ<sup>6</sup>-sulfane (11)**

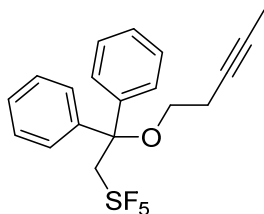

C<sub>19</sub>H<sub>19</sub>F<sub>5</sub>OS  
390,1077

The compound was prepared according to general procedure A. In a Young-type reaction tube 35.3 μL (0.200 mmol, 1.00 eq.) of diphenylethylene **2** as well as 187 μL (168 mg, 2.00 mmol, 10.0 eq.) of 3-pentynol were used to prepare the compound. The compound was purified by preparative TLC (silica, 1% Et<sub>2</sub>O in hexanes). The yield of the product was determined by analyzing the crude reaction mixture by means of <sup>19</sup>F-NMR spectroscopy (33%).

**<sup>1</sup>H NMR** (500 MHz, Chloroform-*d*) δ 7.33 – 7.27 (m, 8H, CH<sub>Ar</sub>), 7.23 (m, 2H, CH<sub>Ar</sub>), 4.72 (p, *J* = 7.8 Hz, 2H, CH<sub>2</sub>-SF<sub>5</sub>), 3.31 (t, *J* = 7.4 Hz, 2H, O-CH<sub>2</sub>), 2.48 (tq, *J* = 7.4, 2.6 Hz, 2H, CH<sub>2</sub>-C≡C), 1.75 (t, *J* = 2.5 Hz, 3H, C≡C-CH<sub>3</sub>).

**<sup>13</sup>C NMR** (126 MHz, Chloroform-*d*) δ 143.04 (C<sub>q,Ar</sub>), 128.36 (CH<sub>Ar</sub>), 127.56 (CH<sub>Ar</sub>), 126.57 (CH<sub>Ar</sub>), 80.76 (C<sub>q,Bridge</sub>), 76.96 (C<sub>C≡C</sub>), 75.64 (C<sub>C≡C</sub>), 75.21 (p, *J* = 11.4 Hz, CH<sub>2</sub>-SF<sub>5</sub>), 62.14 (O-CH<sub>2</sub>), 20.22 (-CH<sub>2</sub>-C≡C), 3.57 (C≡C-CH<sub>3</sub>).

**<sup>19</sup>F NMR** (471 MHz, Chloroform-*d*) δ 84.30 (p, *J* = 149 Hz, 1F, F<sub>ax</sub>), 72.12 (dt, *J* = 149, 8.0 Hz, 4F, F<sub>eq</sub>).

**HR-EI-MS** *m/z* (calc.) = 390.1077 [M<sup>+</sup>]; *m/z* (found) = 390.1075 [M<sup>+</sup>] (C<sub>19</sub>H<sub>19</sub>F<sub>5</sub>OS).

**(2-(Allyloxy)-2,2-diphenylethyl)-pentafluoro- $\lambda^6$ -sulfane (12)**

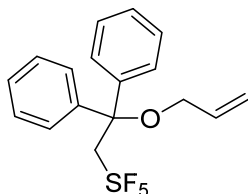

C<sub>17</sub>H<sub>17</sub>F<sub>5</sub>OS  
364,0920

The compound was prepared according to general procedure A. In a Young-type reaction tube 35.3  $\mu$ L (0.200 mmol, 1.00 eq.) of diphenylethylene **2** as well as 137  $\mu$ L (116 mg, 2.00 mmol, 10.0 eq.) of allyl alcohol were used. The compound was purified by column chromatography (silica, hexanes). The yield of the product was determined by analyzing the crude reaction mixture by means of <sup>19</sup>F-NMR spectroscopy (32%). The product was obtained as a colorless oil.

**<sup>1</sup>H NMR** (500 MHz, Chloroform-*d*)  $\delta$  7.39 – 7.19 (m, 10H, CH<sub>Ar</sub>), 5.92 (ddd, *J* = 17.3, 10.2, 5.0 Hz, 1H, C=CH<sub>2</sub>), 5.39 (dq, *J* = 17.3, 1.9 Hz, 1H, C=CH<sub>2</sub>), 5.18 (dq, *J* = 10.5, 1.7 Hz, 1H, CH=CH<sub>2</sub>), 4.73 (p, *J* = 7.9 Hz, 2H, CH<sub>2</sub>-SF<sub>5</sub>), 3.76 (dt, *J* = 5.0, 1.7 Hz, 2H, O-CH<sub>2</sub>).

**<sup>13</sup>C NMR** (126 MHz, Chloroform-*d*)  $\delta$  142.81 (C<sub>q,Ar</sub>), 134.22 (CH=CH<sub>2</sub>), 128.38 (CH<sub>Ar</sub>), 127.63 (CH<sub>Ar</sub>), 126.69 (CH<sub>Ar</sub>), 116.27 (CH=CH<sub>2</sub>), 81.06 (C<sub>q,bridge</sub>), 75.69 (p, *J* = 11.2 Hz, CH<sub>2</sub>-SF<sub>5</sub>), 64.50 (O-CH<sub>2</sub>).

**<sup>19</sup>F NMR** (471 MHz, Chloroform-*d*)  $\delta$  84.26 (p, *J* = 149 Hz, 1F, F<sub>ax</sub>), 72.06 (dt, *J* = 149, 8.1 Hz, 4F, F<sub>eq</sub>).

**HR-EI-MS** *m/z* (calc.) = 364.0920 [M<sup>+</sup>]; *m/z* (found) = 364.0919 [M<sup>+</sup>] (C<sub>17</sub>H<sub>17</sub>F<sub>5</sub>OS).

**(2-(Cyclopentyloxy)-2,2-diphenylethyl)-pentafluoro- $\lambda^6$ -sulfane (13)**

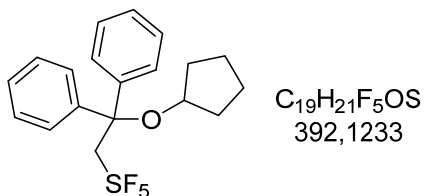

The compound was prepared according to general procedure A. In a Young-type reaction tube 35.3  $\mu$ L (0.200 mmol, 1.00 eq.) of diphenylethylene **2** as well as 181  $\mu$ L (172 mg, 2.00 mmol, 10.0 eq.) of cyclopentanol were used. The compound was purified by column chromatography (silica, 5% DCM in hexanes). The yield of the product was determined by analyzing the crude reaction mixture by means of  $^{19}F$ -NMR spectroscopy (31%). The product was obtained as colorless oil.

$^1H$  NMR (500 MHz,  $CDCl_3$ )  $\delta$  = 7.28 – 7.20 (m, 10H,  $CH_{Ar}$ ), 4.69 (p,  $J=7.8$ , 2H,  $CH_2-SF_5$ ), 3.93 (p,  $J=6.1$ , 1H, **O-CH**), 1.66 – 1.54 (m, 2H,  $CH_{2,cProp}$ ), 1.49 – 1.39 (m,  $CH_{2,cProp}$ ).

$^{13}C$  NMR (126 MHz,  $CDCl_3$ )  $\delta$  143.65 ( $C_{q,Ar}$ ), 127.94 ( $CH_{Ar}$ ), 127.83 ( $CH_{Ar}$ ), 127.61 ( $CH_{Ar}$ ), 81.15 ( $C_{q,Bridge}$ ), 77.0 (p,  $J = 9.8$  Hz,  $CH_2-SF_5$ ), 76.41 (**O-CH**), 33.79 ( $CH_2$ ), 23.54 ( $CH_2$ ).

$^{19}F$  NMR (471 MHz, Chloroform-*d*)  $\delta$  85.14 (p,  $J = 150$  Hz, 1F,  $F_{ax}$ ), 72.64 (dt,  $J = 149$  Hz, 8.0 Hz, 4F,  $F_{eq}$ ).

**HR-EI-MS**  $m/z$  (calc.) = 392.1233 [ $M^{+}$ ];  $m/z$  (found) = 392.1235 [ $M^{+}$ ] ( $C_{19}H_{21}OF_5S$ ).

### 3-(2-(Pentafluoro- $\lambda^6$ -sulfaneyl)-1,1-diphenylethoxy)-propanenitrile (14)

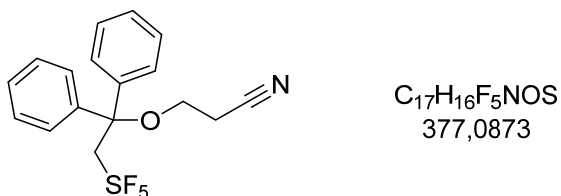

The compound was prepared according to general procedure A. In a Young-type reaction tube 35.3  $\mu$ L (0.200 mmol, 1.00 eq.) of diphenylethylene **2** as well as 137  $\mu$ L (142 mg, 2.00 mmol, 10.0 eq.) of 3-hydroxypropanenitrile were used. The compound was purified by column chromatography (silica, 50% DCM in hexanes). The yield of the product was determined by analyzing the crude reaction mixture by means of  $^{19}F$ -NMR spectroscopy (29%). The product was obtained as colorless needles.

$^1H$  NMR (500 MHz, Chloroform-*d*)  $\delta$  7.33 (m, 8H,  $CH_{Ar}$ ), 7.27 (m, 2H,  $CH_{Ar}$ ), 4.73 (p,  $J$  = 7.7 Hz, 2H,  $CH_2SF_5$ ), 3.46 (t,  $J$  = 6.4 Hz, 2H,  $OCH_2$ ), 2.66 (t,  $J$  = 6.4 Hz, 2H,  $CH_2CN$ ).

$^{13}C$  NMR (126 MHz, Chloroform-*d*)  $\delta$  142.11 ( $C_{q,Ar}$ ), 128.64 ( $CH_{Ar}$ ), 127.97 ( $CH_{Ar}$ ), 126.44 ( $CH_{Ar}$ ), 117.58 ( $C\equiv N$ ), 81.30 ( $C_{q,bridge}$ ), 74.95 (p,  $J$  = 11.2 Hz,  $CH_2SF_5$ ), 58.28 ( $O-CH_2$ ), 19.02 ( $CH_2CN$ ).

$^{19}F$  NMR (471 MHz, Chloroform-*d*)  $\delta$  83.91 (p,  $J$  = 148 Hz, 1F,  $F_{ax}$ ), 72.03 (dt,  $J$  = 149, 8.0 Hz, 4F,  $F_{eq}$ ).

HR-EI-MS  $m/z$  (calc.) = 377.0873 [ $M^{+}$ ];  $m/z$  (found) = 377.0873 [ $M^{+}$ ] ( $C_{17}H_{16}F_5NOS$ ).

### Pentafluoro-(2-isopropoxy-2,2-diphenylethyl)- $\lambda^6$ -sulfane (15)

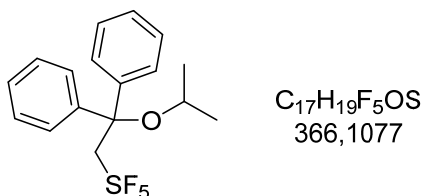

The compound was prepared according to general procedure A. In a Young-type reaction tube 35.3  $\mu$ L (0.200 mmol, 1.00 eq.) of diphenylethylene **2** as well as 154  $\mu$ L (120 mg, 2.00 mmol, 10.0 eq.) of *i*-PrOH were used. The compound was purified by column chromatography (silica, 5% DCM in hexanes). The yield of the product was determined by analyzing the crude reaction mixture by means of  $^{19}F$ -NMR spectroscopy (20%). The product was obtained as colorless oil.

**Scale-up:** The reaction was also run on a 1.00 mmol scale using 5.5 bar of  $SF_6$ . The yield was determined to be 29% NMR.

**$^1H$  NMR** (500 MHz, Chloroform-*d*)  $\delta$  7.50 (d,  $J$  = 7.7 Hz, 2H,  $CH_{Ar}$ ), 7.36 (t,  $J$  = 7.4 Hz, 2H,  $CH_{Ar}$ ), 7.31 (t,  $J$  = 7.3 Hz, 1H,  $CH_{Ar}$ ), 4.00 – 3.89 (m, 1H,  $CH_2SF_5$ ), 3.89 – 3.75 (m, 1H,  $CH_2SF_5$ ), 3.55 (h,  $J$  = 6.1 Hz, 1H,  $CHiPr$ ), 1.91 (s, 3H,  $CH_3$ ), 1.15 (d,  $J$  = 6.1 Hz, 3H,  $CHCH_3$ ), 0.93 (d,  $J$  = 6.1 Hz, 3H,  $CHCH_3$ ).

**$^{13}C$  NMR** (126 MHz, Chloroform-*d*)  $\delta$  143.06 ( $C_{q,Ar}$ ), 128.32 ( $CH_{Ar}$ ), 128.19 ( $CH_{Ar}$ ), 127.05 ( $CH_{Ar}$ ), 77.88 ( $C_{q,Bridge}$ ), 66.09 ( $CH_2-SF_5$ ), 24.88 ( $CH_3-iPr$ ), 24.36 ( $CH_3-iPr$ ), 22.00 ( $CH_3$ ).

**$^{19}F$  NMR** (471 MHz, Chloroform-*d*)  $\delta$  85.77 (p,  $J$  = 151 Hz, 1F,  $F_{ax}$ ), 72.69 (dt,  $J$  = 149, 8.2 Hz, 4F,  $F_{eq}$ ).

**HR-EI-MS**  $m/z$  (calc.) = 366.1077 [ $M^+$ ];  $m/z$  (found) = 366.1076 [ $M^+$ ] ( $C_{17}H_{19}OF_5S$ ).



### Pentafluoro-(2-(pent-4-yn-1-yloxy)-2,2-diphenylethyl)- $\lambda^6$ -sulfane (16)

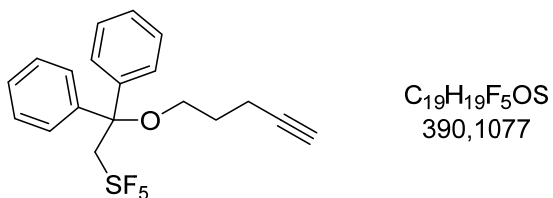

The compound was prepared according to general procedure A. In a Young-type reaction tube 35.3  $\mu$ L (0.200 mmol, 1.00 eq.) of diphenylethylene **2** as well as 55.6  $\mu$ L (50.5 mg, 0.600 mmol, 3.00 eq.) of 4-pentynol were used. The compound was prepurified by IPLC (Puriflash, RP-C18, 60% to 78% MeCN in water) and the product containing fraction was purified by column chromatography (silica, 15% DCM in hexanes) as well as final consecutive purification by column chromatography (silica, 5% DCM in cyclohexanes,  $R_f$  (40% DCM in cyclohexanes = 0.5). The yield of the product was determined by analyzing the crude reaction mixture by means of  $^{19}F$ -NMR spectroscopy (26%).

$^1H$  NMR (500 MHz, Chloroform-*d*)  $\delta$  7.32-7.13 (m, 10H,  $CH_{Ar}$ ) 4.74 (p,  $J$  = 7.8 Hz, 1H,  $CH_2-SF_5$ ), 3.31 (t,  $J$  = 5.9 Hz, 1H, O- $CH_2$ ), 2.39 (td,  $J$  = 7.3, 2.7 Hz, 2H,  $CH_2-C\equiv C$ ), 1.91 (t,  $J$  = 2.7 Hz, 1H,  $C\equiv C-H$ ), 1.89 – 1.83 (m, 2H,  $CH_2CH_2CH_2$ ).

$^{13}C$  NMR (126 MHz, Chloroform-*d*)  $\delta$  143.04 ( $C_{q,Ar}$ ), 128.36 ( $CH_{Ar}$ ), 127.56 ( $CH_{Ar}$ ), 126.57 ( $CH_{Ar}$ ), 80.76 ( $C_{q,Bridge}$ ), 76.96 ( $C_{C\equiv C}$ ), 75.64 ( $C_{C\equiv C}$ ), 75.21 (p,  $J$  = 11.4 Hz,  $CH_2-SF_5$ ), 62.14 (O- $CH_2$ ), 20.22 (- $CH_2-C\equiv C$ ), 3.57 ( $C\equiv C-CH_3$ ).

$^{19}F$  NMR (471 MHz, Chloroform-*d*)  $\delta$  84.40 (p,  $J$  = 149 Hz, 1F,  $F_{ax}$ ), 72.08 (dt,  $J$  = 149, 8.0 Hz, 4F,  $F_{eq}$ ).

HR-EI-MS  $m/z$  (calc.) = 390.1077 [ $M^{+}$ ];  $m/z$  (found) = 390.1077 [ $M^{+}$ ] ( $C_{19}H_{19}F_5OS$ ).

**(2-(But-3-yn-1-yloxy)-2,2-diphenylethyl)-pentafluoro- $\lambda^6$ -sulfane (17)**

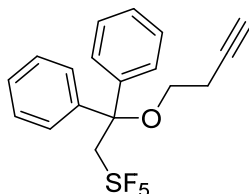

C<sub>18</sub>H<sub>17</sub>F<sub>5</sub>OS  
376,0920

The compound was prepared according to general procedure A. In a Young-type reaction tube 35.3  $\mu$ L (0.200 mmol, 1.00 eq.) of diphenylethylene **2** as well as 151  $\mu$ L (140 mg, 2.00 mmol, 10.00 eq.) of 3-butyn-1-ol were used to prepare the compound. The compound was prepurified by IPLC (Puriflash, RP-C18, 75% to 95% MeCN in water) and the product containing fraction was purified by column chromatography (silica, 15% DCM in hexanes) as well as final consecutive purification by column chromatography (silica, 5% DCM in cyclohexanes,  $R_f$  (20% DCM in cyclohexanes = 0.2). The yield of the product was determined by analyzing the crude reaction mixture by means of <sup>19</sup>F-NMR spectroscopy (17%). The product was isolated as colorless oil.

**<sup>1</sup>H NMR** (500 MHz, CDCl<sub>3</sub>)  $\delta$  = 7.35 – 7.21 (m, 10H, CH<sub>Ar</sub>), 4.73 (p,  $J$ =7.8, 2H, CH<sub>2</sub>-SF<sub>5</sub>), 3.36 (t,  $J$ =7.1, 2H, O-CH<sub>2</sub>), 2.54 (td,  $J$ =7.1, 2.7, 2H, CH<sub>2</sub>-C $\equiv$ C), 1.97 (t,  $J$ =2.7, 1H, C $\equiv$ C-H).

**<sup>13</sup>C NMR** (126 MHz, CDCl<sub>3</sub>)  $\delta$  = 142.88 (C<sub>q,Ar</sub>), 128.41 (CH<sub>Ar</sub>), 127.63 (CH<sub>Ar</sub>), 126.54 (CH<sub>Ar</sub>), 81.08 (C $\equiv$ C-H), 80.82 (C<sub>q,Bridge</sub>), 75.14 (p,  $J$  = 12.0 Hz, CH<sub>2</sub>-SF<sub>5</sub>), 69.55 (C $\equiv$ C-H), 61.48 (O-CH<sub>2</sub>), 19.99 (CH<sub>2</sub>-C $\equiv$ C).

**<sup>19</sup>F NMR** (471 MHz, CDCl<sub>3</sub>)  $\delta$  = 84.25 (p,  $J$  = 151 Hz, 1F, F<sub>ax</sub>), 72.07 (dt,  $J$ =148.4 Hz, 7.4 Hz, 4F, F<sub>eq</sub>).

**HR-EI-MS**  $m/z$  (calc.) = 376.0920 [M<sup>+</sup>];  $m/z$  (found) = 376.0921 [M<sup>+</sup>] (C<sub>18</sub>H<sub>17</sub>F<sub>5</sub>OS).

**Pentafluoro-(2-(penta-3,4-dien-1-yloxy)-2,2-diphenylethyl)- $\lambda^6$ -sulfane (18)**

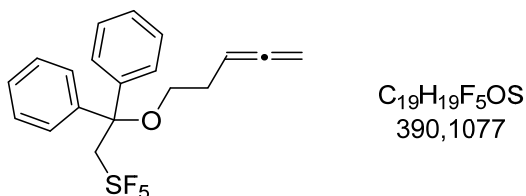

The compound was prepared according to a modified procedure of the general procedure A. In a Young-type reaction tube 26.0  $\mu$ L (26.5 mg, 0.148 mmol, 1.00 eq.) of diphenylethylene **2** as well as 188  $\mu$ L (168 mg, 2.00 mmol, 13.6 eq.) of 3,4-pentadien-1-ol were used. The compound was purified by column chromatography (silica, 5% DCM in hexanes,  $R_f$  = 0.3 in 10% DCM in hexanes). The yield of the product was determined by analyzing the crude reaction mixture by means of  $^{19}F$ -NMR spectroscopy (19%). The product was obtained as colorless oil.

$^1H$  NMR (500 MHz, Chloroform-*d*)  $\delta$  7.33 – 7.27 (m, 8H,  $CH_{Ar}$ ), 7.23 (ddt,  $J$  = 6.3, 5.3, 2.6 Hz, 2H,  $CH_{Ar}$ ), 5.16 (p,  $J$  = 7.0 Hz, 1H,  $CH_2CH=C=$ ), 4.73 (p,  $J$  = 7.9 Hz, 2H,  $CH_2SF_5$ ), 4.69 – 4.63 (m, 2H,  $CH_2CH=CH_2$ ), 3.28 (t,  $J$  = 6.6 Hz, 2H,  $OCH_2$ ), 2.44 – 2.24 (m, 2H,  $CH_2CH=C=$ ).

$^{13}C$  NMR (126 MHz, Chloroform-*d*)  $\delta$  209.19 ( $C_{q,allene}$ ), 143.26 ( $C_{q,Ar}$ ), 128.32 ( $CH_{Ar}$ ), 127.50 ( $CH_{Ar}$ ), 126.62 ( $CH_{Ar}$ ), 86.79 ( $CCH=CH_2$ ), 75.26 (p,  $J$  = 10.7 Hz,  $CH_2SF_5$ ), 74.93 ( $CH_2=C$ ), 62.56 ( $OCH_2$ ), 29.23 ( $OCH_2CH_2$ ).

$^{19}F$  NMR (471 MHz, Chloroform-*d*)  $\delta$  84.45 (p,  $J$  = 149, 1F,  $F_{ax}$ ), 72.10 (dt,  $J$  = 149.1, 8.0 Hz, 4F,  $F_{eq}$ ).

**HR-EI-MS**  $m/z$  (calc.) = 263.1436 [ $M-SF_5^{*+}$ ];  $m/z$  (found) = 263.1435 [ $M-SF_5^{*+}$ ] ( $C_{19}H_{19}O$ );  $m/z$  (calc.) = 249.1279 [ $M-CH_2SF_5^{*+}$ ];  $m/z$  (found) = 249.1278 [ $M-CH_2SF_5^{*+}$ ] ( $C_{18}H_{17}O$ ).

### Pentafluoro-(2-methoxy-2-phenylpropyl)- $\lambda^6$ -sulfane (8)

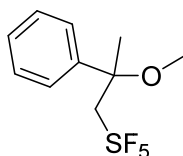

C<sub>10</sub>H<sub>13</sub>F<sub>5</sub>OS  
276,0607

The compound was prepared according to general procedure A. In a Young-type reaction tube 26.0  $\mu$ L (0.200 mmol, 1.00 eq.) of  $\alpha$ -methylstyrene **1** as well as 81.1  $\mu$ L (64.1 mg, 2.00 mmol, 10.0 eq.) of MeOH were used to prepare the compound. The compound was purified by column chromatography (silica, hexanes to 2% DCM in hexanes). The product was obtained as volatile oil. The yield of the product was determined by analyzing the crude reaction mixture by means of <sup>19</sup>F-NMR spectroscopy (37%).

**<sup>1</sup>H NMR** (500 MHz, Chloroform-*d*)  $\delta$  7.45 – 7.36 (m, 4H, **CH<sub>Ar</sub>**), 7.34 – 7.30 (m, 1H, **CH<sub>Ar</sub>**), 3.94 (dp, *J* = 14.2, 8.8 Hz, 1H, **CH<sub>2,dia</sub>SF<sub>5</sub>**), 3.81 (dp, *J* = 14.2, 8.7 Hz, 1H, **CH<sub>2,dia</sub>SF<sub>5</sub>**), 3.12 (s, 3H, **OCH<sub>3</sub>**), 1.85 (s, 3H, **CH<sub>3</sub>**).

**<sup>13</sup>C NMR** (126 MHz, Chloroform-*d*)  $\delta$  142.02 (**C<sub>q,Ar</sub>**), 128.78 (**CH<sub>Ar</sub>**), 128.23 (**CH<sub>Ar</sub>**), 126.54 (**CH<sub>Ar</sub>**), 81.13 (p, *J* = 10.0 Hz, **CH<sub>2,dia</sub>-SF<sub>5</sub>**), 78.33 (p, *J* = 2.3 Hz, **C<sub>q,bridge</sub>**), 50.64 (**OCH<sub>3</sub>**), 21.13 (p, *J* = 2.2 Hz, **CH<sub>3</sub>**).

**<sup>19</sup>F NMR** (471 MHz, Chloroform-*d*)  $\delta$  85.10 (p, *J* = 148 Hz, 1F, **F<sub>ax</sub>**), 70.01 (dt, *J* = 147, 8.8 Hz, 4F, **F<sub>eq</sub>**).

**HR-EI-MS** *m/z* (calc.) = 276.0607 [**M<sup>+</sup>**]; *m/z* (found) = 276.0608 [**M<sup>+</sup>**] (C<sub>10</sub>H<sub>13</sub>OF<sub>5</sub>S).

### Pentafluoro-(2-isopropoxy-2-phenylpropyl)- $\lambda^6$ -sulfane (19)

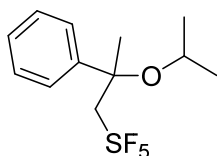

C<sub>12</sub>H<sub>17</sub>F<sub>5</sub>OS  
304,0920

The compound was prepared according to a modified general procedure A. In a Young-type reaction tube 23.1  $\mu$ L (0.178 mmol, 1.00 eq.) of  $\alpha$ -methylstyrene **1** as well as 154  $\mu$ L (120 mg, 2.00 mmol, 11.3 eq.) of isopropanol were used to prepare the compound. The compound was purified by column chromatography (silica, 10% DCM in hexanes). The yield of the product was determined by analyzing the crude reaction mixture by means of <sup>19</sup>F-NMR spectroscopy (38%). The product was isolated as colorless oil.

**Scale up:** The reaction was also scaled up to 1.00 mmol following the general procedure A. The yield was determined by <sup>19</sup>F-NMR-spectroscopy to be 40%.

**<sup>1</sup>H NMR** (500 MHz, Chloroform-*d*)  $\delta$  7.50 (d,  $J$  = 7.7 Hz, 2H, **CH<sub>Ar</sub>**), 7.36 (t,  $J$  = 7.4 Hz, 2H, **CH<sub>Ar</sub>**), 7.31 (t,  $J$  = 7.3 Hz, 1H, **CH<sub>Ar</sub>**), 4.05 – 3.89 (m, 1H, **CH<sub>2,dia</sub>-SF<sub>5</sub>**), 3.89 – 3.75 (m, 1H, **CH<sub>2,dia</sub>-SF<sub>5</sub>**), 3.55 (p,  $J$  = 6.1 Hz, 1H, **CH-(CH<sub>3</sub>)<sub>2</sub>**), 1.91 (s, 3H, **CH<sub>3</sub>**), 1.15 (d,  $J$  = 6.1 Hz, 3H, **CH-CH<sub>3,dia</sub>**), 0.93 (d,  $J$  = 6.1 Hz, 3H, **CH-CH<sub>3,dia</sub>**).

**<sup>13</sup>C NMR** (126 MHz, Chloroform-*d*)  $\delta$  143.06 (**C<sub>q,Ar</sub>**), 128.32 (**CH<sub>Ar</sub>**), 128.19 (**CH<sub>Ar</sub>**), 127.05 (**CH<sub>Ar</sub>**), 82.11 (p,  $J$  = 9.6 Hz, **CH<sub>2</sub>-SF<sub>5</sub>**), 77.88 (**C<sub>q,Bridge</sub>**), 66.09 (**O-CH(CH<sub>3</sub>)<sub>2</sub>**), 24.88 (**CH-CH<sub>3,dia</sub>**), 24.36 (**CH-CH<sub>3,dia</sub>**), 22.00 (**CH<sub>3</sub>**).

**<sup>19</sup>F NMR** (471 MHz, Chloroform-*d*)  $\delta$  86.10 (p,  $J$  = 148 Hz, 1F, **F<sub>ax</sub>**), 70.05 (dt,  $J$  = 147, 8.9 Hz, 4F, **F<sub>eq</sub>**).

**HR-EI-MS**  $m/z$  (calc.) = 303.0842 [M-H<sup>+</sup>];  $m/z$  (found.) = 303.0842 [M-H<sup>+</sup>] (C<sub>12</sub>H<sub>16</sub>F<sub>5</sub>OS);  $m/z$  (calc.) = 245.0423 [M-OiPr<sup>+</sup>];  $m/z$  (found) = 245.0424 [M-OiPr<sup>+</sup>] (C<sub>9</sub>H<sub>10</sub>F<sub>5</sub>S).

## Pentafluoro-(2-(pent-3-yn-1-yloxy)-2-phenylpropyl)-λ<sup>6</sup>-sulfane (20)

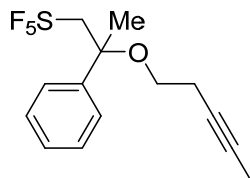

C<sub>14</sub>H<sub>17</sub>F<sub>5</sub>OS  
328.3410

The compound was prepared according to general procedure A. In a Young-type reaction tube 26.0 μL (23.6 mg, 0.20 mmol, 1.00 eq.) of α-methylstyrene **1** as well as 186 μL (168 mg, 2.00 mmol, 10.0 eq.) of 3-pentynol were used to prepare the compound. The compound was purified by column chromatography (silica, 5% DCM in hexanes). The yield of the product was determined by analyzing the crude reaction mixture by means of <sup>19</sup>F-NMR spectroscopy (34%). The product was obtained as colorless oil.

**<sup>1</sup>H NMR** (500 MHz, Chloroform-*d*) δ 7.45 (d, *J* = 7.1 Hz, 2H, **CH<sub>Ar</sub>**), 7.38 (t, *J* = 7.6 Hz, 2H, **CH<sub>Ar</sub>**), 7.34 – 7.29 (m, 1H, **CH<sub>Ar</sub>**), 3.95 (dp, *J* = 14.1, 8.7 Hz, 1H, **CH<sub>2</sub>-SF<sub>5</sub>**), 3.82 (dp, *J* = 14.2, 8.5 Hz, 1H, **CH<sub>2</sub>-SF<sub>5</sub>**), 3.40 (dt, *J* = 7.5 Hz, 1H, **O-CH<sub>2,dia</sub>**), 3.16 (dt, *J* = 7.7 Hz, 2H, **O-CH<sub>2,dia</sub>**), 2.38 (tq, *J* = 7.3, 2.6 Hz, 2H, **CH<sub>2</sub>**), 1.86 (s, 1H, **CH<sub>3</sub>**), 1.76 (t, *J* = 2.6 Hz, 1H, **CH<sub>3</sub>**).

**<sup>13</sup>C NMR** (126 MHz, CDCl<sub>3</sub>) δ 142.16 (**C<sub>q,Ar</sub>**), 128.71 (**CH<sub>Ar</sub>**), 128.26 (**CH<sub>Ar</sub>**), 126.52 (**CH<sub>Ar</sub>**), 81.22 (p, *J*<sub>CF</sub> = 9.9 Hz, **CH<sub>2</sub>-SF<sub>5</sub>**), 78.02 (C≡C), 77.37 (C<sub>q,Bridge</sub>), 75.90 (C≡C), 61.71 (O-**CH<sub>2</sub>**), 21.60 (C-**CH<sub>3</sub>**), 20.51 (**CH<sub>2</sub>-C≡C**), 3.56 (C≡C-**CH<sub>3</sub>**).

**<sup>19</sup>F NMR** (471 MHz, Chloroform-*d*) δ 85.08 (p, *J* = 148 Hz, 1F, **F<sub>ax</sub>**), 70.12 (dt, *J* = 147, 8.8 Hz, 4F, **F<sub>eq</sub>**).

**HR-EI-MS** *m/z* (calc.) = 328.0920 [**M<sup>+</sup>**]; *m/z* (found) = 328.0923 [**M<sup>+</sup>**] (C<sub>14</sub>H<sub>17</sub>OF<sub>5</sub>S).

### 3-((1-(Pentafluoro- $\lambda^6$ -sulfaneyl)-2-phenylpropan-2-yl)-oxy)-propanenitrile (21)

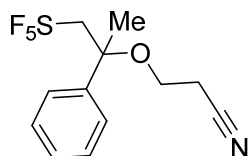

C<sub>12</sub>H<sub>14</sub>F<sub>5</sub>NOS  
315,0716

The compound was prepared according to general procedure A. In a Young-type reaction tube 26.0  $\mu$ L (0.200 mmol, 1.00 eq.) of  $\alpha$ -methylstyrene **1** as well as 137  $\mu$ L (142 mg, 2.00 mmol, 10.0 eq.) of 3-hydroxypropanenitrile were used to prepare the compound. The compound was purified by column chromatography (silica, 20% DCM in hexanes). The yield of the product was determined by analyzing the crude reaction mixture by means of <sup>19</sup>F-NMR spectroscopy (35%). The product was obtained as colorless solid.

**Scale-up:** The reaction was also run on a 1.00 mmol scale. The yield was determined to be 31% by <sup>19</sup>F-NMR.

**<sup>1</sup>H NMR** (500 MHz, CDCl<sub>3</sub>)  $\delta$  = 7.46 (d, J=7.7, 2H, CH<sub>Ar</sub>), 7.41 (t, J=7.6, 2H, CH<sub>Ar</sub>), 7.35 (t, J=7.1, 1H, CH<sub>Ar</sub>), 3.99 (dt, J=14.2, 8.6, 1H, CH<sub>2</sub>SF<sub>5</sub>), 3.82 (dt, J=14.2, 8.4, CH<sub>2</sub>SF<sub>5</sub>), 3.54 (dt, J=8.8, 6.1, 1H, O-CH<sub>2</sub>), 3.36 – 3.22 (m, 1H, O-CH<sub>2</sub>), 2.68 – 2.46 (m, 2H, CH<sub>2</sub>), 1.91 (s, 3H, CH<sub>3</sub>).

**<sup>13</sup>C NMR** (126 MHz, CDCl<sub>3</sub>)  $\delta$  = 141.03 (C<sub>q,Ar</sub>), 129.06 (CH<sub>Ar</sub>), 128.77 (CH<sub>Ar</sub>), 126.43 (CH<sub>Ar</sub>), 117.78 (CN), 80.89 (p, J = 11.0 Hz, CH<sub>2</sub>-SF<sub>5</sub>), 78.59 (C<sub>q,Bridge</sub>), 57.76 (O-CH<sub>2</sub>), 21.32 (CH<sub>3</sub>), 19.24 (CH<sub>2</sub>-CN).

**<sup>19</sup>F NMR** (471 MHz, CDCl<sub>3</sub>)  $\delta$  = 84.59 (p, J = 147 Hz, 1F, F<sub>ax</sub>), 70.13 (dt, J = 147, 9.1, 4F, F<sub>eq</sub>).

**HR-EI-MS** m/z (calc.) = 315.0716 [M<sup>+</sup>]; m/z (found) = 315.0715 [M<sup>+</sup>] (C<sub>12</sub>H<sub>14</sub>F<sub>5</sub>NOS).

**(2-(Cyclopentyloxy)-2-phenylpropyl)-pentafluoro- $\lambda^6$ -sulfane (22)**

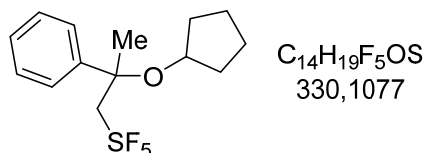

The compound was prepared according to general procedure A. In a Young-type reaction tube 26.0  $\mu$ L (0.20 mmol, 1.0 eq.) of  $\alpha$ -methylstyrene **1** as well as 181  $\mu$ L (172 mg, 2.00 mmol, 10.0 eq.) of cyclopentanol were used. The compound was purified by column chromatography (silica, hexanes). The yield of the product was determined by analyzing the crude reaction mixture by means of  $^{19}F$ -NMR spectroscopy (22%). The product was obtained as a colorless oil.

$^1H$  NMR (500 MHz,  $CDCl_3$ )  $\delta$  = 7.46 (d,  $J=7.7$ , 2H,  $CH_{Ar}$ ), 7.37 (t,  $J=7.6$ , 2H,  $CH_{Ar}$ ), 7.31 (t,  $J=7.3$ , 1H,  $CH_{Ar}$ ), 3.91 (dp,  $J=14.1$ , 8.8, 1H,  $CH_{2,dia-SF_5}$ ), 3.82 – 3.64 (m, 2H,  $CH_{2,dia-SF_5}$  und  $O-CH(CH_3)_2$ ), 1.87 (s, 3H,  $CH_3$ ), 1.77 – 1.31 (m, 8H, 4 x  $CH_{2,cProp,dia}$ ).

$^{13}C$  NMR (126 MHz,  $CDCl_3$ )  $\delta$  = 143.66 ( $C_{q,Ar}$ ), 128.52 ( $CH_{Ar}$ ), 128.06 ( $CH_{Ar}$ ), 126.87 ( $CH_{Ar}$ ), 82.01 (p,  $J = 9.4$  Hz,  $CH_2-SF_5$ ), 78.29 ( $C_{q,Bridge}$ ), 75.76 ( $O-CH(CH_3)_2$ ), 34.65 ( $CH_{2,dia}$ ), 34.22 ( $CH_{2,dia}$ ), 23.96 ( $CH_{2,dia}$ ), 23.44 ( $CH_{2,dia}$ ), 22.58 ( $CH_3$ ).

$^{19}F$  NMR (471 MHz,  $CDCl_3$ )  $\delta$  = 85.57 (p,  $J=148$ , 1F,  $F_{ax}$ ), 70.15 (dt,  $J=146$ , 9.3, 4F,  $F_{ax}$ ).

**HR-EI-MS**  $m/z$  (calc.) = 315.0842 [ $M-Me^{+}$ ];  $m/z$  (found) = 315.0842 [ $M-Me^{+}$ ] ( $C_{13}H_{16}F_5OS$ );  $m/z$  (calc.) = 245.0423 [ $M-cycPentO^{+}$ ];  $m/z$  (found) = 245.0425 [ $M-cycPentO^{+}$ ] ( $C_9H_{10}F_5S$ );  $m/z$  (calc.) = 203.1436 [ $M-SF_5^{+}$ ];  $m/z$  (found) = 203.1436 [ $M-SF_5^{+}$ ] ( $C_{14}H_{19}O$ ).



**(2-(Allyloxy)-2-phenylpropyl)-pentafluoro- $\lambda^6$ -sulfane (23)**

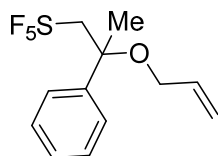

C<sub>12</sub>H<sub>15</sub>F<sub>5</sub>OS  
302,0764

The compound was prepared according to the modified general procedure A. In a Young-type reaction tube 11.6  $\mu$ L (10.6 mg, 0.893 mmol, 1.00 eq.) of  $\alpha$ -methylstyrene **1** as well as 68.3  $\mu$ L (58.3 mg, 1.00 mmol, 11.2 eq.) of allyl alcohol were used. The compound was purified by column chromatography (silica, cyclohexane). The yield of the product was determined by analyzing the crude reaction mixture by means of <sup>19</sup>F-NMR spectroscopy (20%). The product was obtained as colorless oil.

**Scale-up:** The reaction could also be run on a 1.00 mmol scale following the general procedure A. The yield was determined to be 31% by NMR spectroscopy.

**<sup>1</sup>H NMR** (500 MHz, Chloroform-*d*)  $\delta$  7.36 (d,  $J$  = 7.6 Hz, 2H, **CH<sub>Ar</sub>**), 7.31 (t,  $J$  = 7.6 Hz, 2H, **CH<sub>Ar</sub>**), 7.25 (t,  $J$  = 7.2 Hz, 1H, **CH<sub>Ar</sub>**), 5.81 (ddt,  $J$  = 17.3, 10.1, 4.9 Hz, 1H, **HC=CH<sub>2</sub>**), 5.26 (dq,  $J$  = 17.2, 1.9 Hz, 1H, **HC=CH<sub>2</sub>**), 5.08 (dt,  $J$  = 10.5, 1.8 Hz, 1H, **HC=CH<sub>2</sub>**), 3.97 (dq,  $J$ =17.6, 8.7, 1H, **CH<sub>2,dia</sub>-SF<sub>5</sub>**), 3.85 (m, 2H, **CH<sub>2,dia</sub>-SF<sub>5</sub>** und **CH<sub>2,dia</sub>-CH=CH<sub>2</sub>**), 3.64 (dd,  $J$ =12.8, 4.7, 1H, **CH<sub>2,dia</sub>-CH=CH<sub>2</sub>**), 1.81 (s, 3H, **CH<sub>3</sub>**).

**<sup>13</sup>C NMR** (126 MHz, Chloroform-*d*)  $\delta$  142.15 (**C<sub>q,Ar</sub>**), 134.71 (**CH=CH<sub>2</sub>**), 128.78 (**CH<sub>Ar</sub>**), 128.30 (**CH<sub>Ar</sub>**), 126.47 (**CH<sub>Ar</sub>**), 115.89 (**CH=CH<sub>2</sub>**), 81.34 (p,  $J$  = 10.1 Hz, **CH<sub>2</sub>-SF<sub>5</sub>**), 78.27 (**C<sub>q,Bridge</sub>**), 63.78 (**O-CH<sub>2</sub>**), 21.71 (**CH<sub>3</sub>**).

**<sup>19</sup>F NMR** (471 MHz, Chloroform-*d*)  $\delta$  85.04 (p,  $J$  = 147 Hz, 1F, **F<sub>ax</sub>**), 70.15 (dt,  $J$  = 147, 8.9 Hz, 4F, **F<sub>eq</sub>**).

**HR-EI-MS**  $m/z$  (calc.) = 287.0529 [M-Me<sup>+</sup>];  $m/z$  (found) = 287.0529 [M-Me<sup>+</sup>] (C<sub>11</sub>H<sub>12</sub>OFS<sub>5</sub>);  $m/z$  (calc.) = 246.0502 [M-OiPr+H<sup>+</sup>];  $m/z$  (found) = 287.0503 [M-OiPr+H<sup>+</sup>]

(C<sub>9</sub>H<sub>11</sub>OFS<sub>5</sub>); m/z (calc.) = 161.0966 [M-SF<sub>5</sub>-Me<sup>+</sup>]; m/z (found) = 161.0966 [M-SF<sub>5</sub>-Me<sup>+</sup>]  
(C<sub>11</sub>H<sub>13</sub>O).

### Pentafluoro-(2-((2-methylallyl)-oxy)-2-phenylpropyl)- $\lambda^6$ -sulfane (24)

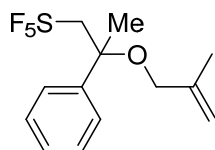

C<sub>13</sub>H<sub>17</sub>F<sub>5</sub>OS  
316,0920

The compound was prepared according to general procedure A. In a Young-type reaction tube 26.0  $\mu$ L (23.6 mg, 0.200 mmol, 1.00 eq.) of  $\alpha$ -methylstyrene **1** as well as 168  $\mu$ L (144 mg, 2.00 mmol, 10.0 eq.) of 2-methyl-2-propen-1-ol were used. The compound was purified by column chromatography (silica, cyclohexane). The yield of the product was determined by analyzing the crude reaction mixture by means of <sup>19</sup>F-NMR spectroscopy (31%). The product was obtained as colorless oil.

**<sup>1</sup>H NMR** (500 MHz, Chloroform-*d*)  $\delta$  7.47 – 7.42 (m, 2H, CH<sub>Ar</sub>), 7.41 – 7.36 (m, 2H, CH<sub>Ar</sub>), 7.35 – 7.30 (m, 1H, CH<sub>Ar</sub>), 5.04 (s, 1H, =CH<sub>a</sub>H<sub>b</sub>), 4.87 (s, 1H, =CH<sub>a</sub>H<sub>b</sub>), 3.98 (dp, *J* = 14.2, 8.7 Hz, 1H, CH<sub>2,dia</sub>-SF<sub>5</sub>), 3.82 (dp, *J* = 14.1, 8.6 Hz, 1H, CH<sub>2,dia</sub>-SF<sub>5</sub>), 3.74 (d, *J* = 12.0 Hz, 1H, OCH<sub>2,dia</sub>), 3.51 (d, *J* = 12.0 Hz, 1H, OCH<sub>2,dia</sub>), 1.89 (s, 3H, CH<sub>3</sub>), 1.72 (s, 3H, CH<sub>3</sub>).

**<sup>13</sup>C NMR** (126 MHz, Chloroform-*d*)  $\delta$  142.15 (C=CH<sub>2</sub>), 142.21 (C<sub>q,Ar</sub>), 128.79 (CH<sub>Ar</sub>), 128.29 (CH<sub>Ar</sub>), 126.50 (CH<sub>Ar</sub>), 111.09 (C=CH<sub>2</sub>), 81.46 (p, *J* = 10.0 Hz, CH<sub>2</sub>SF<sub>5</sub>), 78.20 (C<sub>q,bridge</sub>), 66.51 (OCH<sub>2</sub>), 21.55 (p, *J* = 2.1 Hz, CCH<sub>3</sub>), 19.79 (C(C=CH<sub>2</sub>)CH<sub>3</sub>).

**<sup>19</sup>F NMR** (471 MHz, Chloroform-*d*)  $\delta$  85.10 (p, *J* = 147 Hz, 1F, F<sub>ax</sub>), 70.17 (dt, *J* = 147, 8.8 Hz, 4F, F<sub>eq</sub>).

**HR-EI-MS** *m/z* (calc.) = 301.0686 [M-Me<sup>++</sup>]; *m/z* (found) = 301.0686 [M-Me<sup>++</sup>] (C<sub>12</sub>H<sub>14</sub>OF<sub>5</sub>S); *m/z* (calc.) = 245.0423 [M-OMeAllyl<sup>++</sup>]; *m/z* (found) = 245.0422 [M-OMeAllyl<sup>++</sup>] (C<sub>9</sub>H<sub>10</sub>F<sub>5</sub>S).

## Pentafluoro(2-phenyl-2-(prop-2-yn-1-yloxy)propyl) - $\lambda^6$ -sulfane (25)

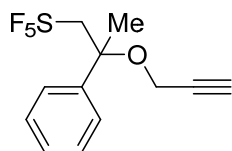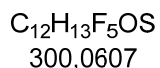

The compound was prepared according to general procedure A. In a Young-type reaction tube 26.0  $\mu\text{L}$  (23.6 mg, 0.200 mmol, 1.00 eq.) of  $\alpha$ -methylstyrene **1** as well as 35.5  $\mu\text{L}$  (34.2 mg, 0.610 mmol, 3.04 eq.) of propargylic alcohol were used. The compound was prepurified by IPLC (Puriflash, RP-C18, 65% to 72% MeCN in water) and the product containing fraction was purified by column chromatography (silica, cyclohexane to 10% DCM in cyclohexane,  $R_f$  (50% DCM in cyclohexanes) = 0.76). The yield of the product was determined by analyzing the crude reaction mixture by means of  $^{19}\text{F}$ -NMR spectroscopy (20%).

**$^1\text{H}$  NMR** (500 MHz, Chloroform-*d*)  $\delta$  7.46 – 7.44 (m, 2H, **CH<sub>Ar</sub>**), 7.40 (ddd,  $J = 7.8, 6.7, 1.3$  Hz, 2H, **CH<sub>Ar</sub>**), 7.37 – 7.31 (m, 1H, **CH<sub>Ar</sub>**), 4.06 – 3.77 (m, 4H, **CH<sub>2</sub>SF<sub>5</sub>**, **OCH<sub>2</sub>**), 2.39 (t,  $J = 2.4$  Hz, 1H, **C $\equiv$ CH**), 1.93 (s, 3H, **CH<sub>3</sub>**).

**$^{13}\text{C}$  NMR** (126 MHz, Chloroform-*d*)  $\delta$  141.15 (**C<sub>q,Ar</sub>**), 128.93 (**CH<sub>Ar</sub>**), 128.65 (**CH<sub>Ar</sub>**), 126.64 (**CH<sub>Ar</sub>**), 81.12 (p,  $J = 10.7$  Hz, **CH<sub>2</sub>SF<sub>5</sub>**), 80.34 (**C $\equiv$ CH**), 79.30 (**C<sub>q,bridge</sub>**), 73.94 (**C $\equiv$ CH**), 51.68 (**OCH<sub>2</sub>**), 21.45 (**CH<sub>3</sub>**).

**$^{19}\text{F}$  NMR** (471 MHz, Chloroform-*d*)  $\delta$  84.66 (p,  $J = 148$  Hz, 1F, **F<sub>ax</sub>**), 70.16 (dt,  $J = 147, 8.7$  Hz, 4F, **F<sub>eq</sub>**).

**HR-EI-MS**  $m/z$  (calc.) = 300.0607 [**M<sup>+</sup>**];  $m/z$  (found) = 300.0607 [**M<sup>+</sup>**]; (**C<sub>12</sub>H<sub>13</sub>OF<sub>5</sub>S**).

**(2-(But-3-yn-1-yloxy)-2-phenylpropyl)-pentafluoro- $\lambda^6$ -sulfane (26)**

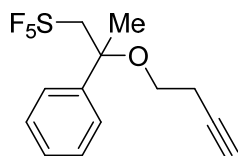

C<sub>13</sub>H<sub>15</sub>F<sub>5</sub>OS  
314,0764

The compound was prepared according to a modified general procedure A. In a Young-type reaction tube 26.0  $\mu$ L (0.200 mmol, 1.00 eq.) of  $\alpha$ -methylstyrene **1** as well as 45.4  $\mu$ L (42.1 mg, 0.600 mmol, 3.00 eq.) of 3-butynol were used to prepare the compound. The compound was prepurified by IPLC (Puriflash, RP-C18, 65% to 73% MeCN in water) and the product containing fraction was purified by column chromatography (silica, cyclohexane to 10% DCM in cyclohexane, R<sub>f</sub> (50% DCM in cyclohexanes) = 0.61). The yield of the product was determined by analyzing the crude reaction mixture by means of <sup>19</sup>F-NMR spectroscopy (19%).

**<sup>1</sup>H NMR** (500 MHz, Chloroform-*d*)  $\delta$  7.48 – 7.43 (m, 2H, **CH<sub>Ar</sub>**), 7.42 – 7.36 (m, 2H, **CH<sub>Ar</sub>**), 7.35 – 7.30 (m, 1H, **CH<sub>Ar</sub>**), 3.96 (dp, *J* = 14.1, 8.8 Hz, 1H, **CH<sub>2,dia</sub>SF<sub>5</sub>**), 3.82 (dp, *J* = 14.2, 8.6 Hz, 1H, **CH<sub>2,dia</sub>SF<sub>5</sub>**), 3.45 (dt, *J* = 8.5, 6.9 Hz, 1H, **OCH<sub>2,dia</sub>**), 3.22 (dt, *J* = 8.5, 7.2 Hz, 1H, **OCH<sub>2,dia</sub>**), 2.45 (td, *J* = 7.1, 2.7 Hz, 2H, **CH<sub>2</sub>**), 1.96 (t, *J* = 2.7 Hz, 1H, **C $\equiv$ C-H**), 1.88 (s, 3H, **CH<sub>3</sub>**).

**<sup>13</sup>C NMR** (126 MHz, Chloroform-*d*)  $\delta$  141.98 (**C<sub>q,Ar</sub>**), 128.78 (**CH<sub>Ar</sub>**), 128.35 (**CH<sub>Ar</sub>**), 126.50 (**CH<sub>Ar</sub>**), 81.30 (**C $\equiv$ CH**), 81.16 (p, *J* = 10.2 Hz, **CH<sub>2</sub>SF<sub>5</sub>**), 78.10 (p, *J* = 2.0 Hz, **C<sub>q,bridge</sub>**), 69.47 (**C $\equiv$ CH**), 61.06 (**OCH<sub>2</sub>**), 21.56 (p, *J* = 1.9 Hz, **CCH<sub>3</sub>**), 20.26 (**CH<sub>2</sub>CH<sub>2</sub>**).

**<sup>19</sup>F NMR** (471 MHz, Chloroform-*d*)  $\delta$  85.01 (p, *J* = 147 Hz, 1F, **F<sub>ax</sub>**), 70.14 (dt, *J* = 147, 8.7 Hz, 4F, **F<sub>eq</sub>**).

**HR-EI-MS** *m/z* (calc.) = 314.0764 [**M<sup>+</sup>**]; *m/z* (found) = 314.0766 [**M<sup>+</sup>**]; (C<sub>13</sub>H<sub>15</sub>OF<sub>5</sub>S).

### Pentafluoro-(2-(pent-4-yn-1-yloxy)-2-phenylpropyl)- $\lambda^6$ -sulfane (27)

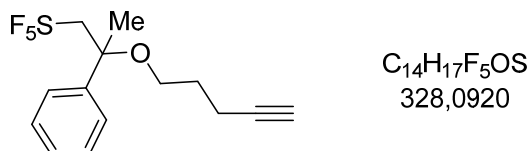

The compound was prepared according to general procedure A. In a Young-type reaction tube 26.0  $\mu$ L (0.200 mmol, 1.00 eq.) of  $\alpha$ -methylstyrene **1** as well as 55.8  $\mu$ L (50.5 mg, 0.600 mmol, 3.00 eq.) of 4-pentynol were used to prepare the compound. The compound was prepurified by IPLC (Puriflash, RP-C18, 60% to 78% MeCN in water) and the product containing fraction was purified by column chromatography (hexanes to 15% DCM in hexanes,  $R_f$  (30% DCM in hexanes) = 0.5). The yield of the product was determined by analyzing the crude reaction mixture by means of  $^{19}F$ -NMR spectroscopy (24%). The product was obtained as colorless liquid.

$^1H$  NMR (500 MHz, Chloroform-*d*)  $\delta$  7.42 (d,  $J$  = 7.8 Hz, 2H, **CH<sub>Ar</sub>**), 7.38 (dd,  $J$  = 8.3, 6.7 Hz, 2H, **CH<sub>Ar</sub>**), 7.34 – 7.29 (m, 1H, **CH<sub>Ar</sub>**), 3.92 (dq,  $J$ =17.5, 8.6, 1H, **CH<sub>2,dia</sub>-SF<sub>5</sub>**), 3.78 (dq,  $J$ =14.9, 8.3, 1H, **CH<sub>2,dia</sub>-SF<sub>5</sub>**), 3.41 (q,  $J$ =7.3, 1H, O-**CH<sub>2,dia</sub>**), 3.17 (q,  $J$ =6.3, 1H, O-**CH<sub>2,dia</sub>**), 2.34 (t,  $J$ =7.4, 2H, **CH<sub>2</sub>-C $\equiv$ CH**), 1.92 (t,  $J$  = 2.5 Hz, 1H, C $\equiv$ C-**H**), 1.87 (s, **CH<sub>3</sub>**), 1.84 – 1.69 (m, 2H, -CH<sub>2</sub>-**CH<sub>2</sub>**-CH<sub>2</sub>).

$^{13}C$  NMR (126 MHz, CDCl<sub>3</sub>)  $\delta$  142.36 (**C<sub>q,Ar</sub>**), 128.75 (**CH<sub>Ar</sub>**), 128.21 (**CH<sub>Ar</sub>**), 126.45 (**CH<sub>Ar</sub>**), 84.12 (**C $\equiv$ C**), 81.34 (p,  $J$  = 9.5 Hz, **CH<sub>2</sub>-SF<sub>5</sub>**), 77.78 (**C<sub>q,Bridge</sub>**), 68.58 (**C $\equiv$ CH**), 60.65 (O-**CH<sub>2</sub>**), 29.03 (CH<sub>2</sub>), 21.56 (**CH<sub>3</sub>**), 15.33 (CH<sub>2</sub>-**CH<sub>2</sub>**-CH<sub>2</sub>).

$^{19}F$ -NMR (471 MHz, CDCl<sub>3</sub>)  $\delta$  = 85.21 (p,  $J$ =148, 1F, **F<sub>ax</sub>**), 70.13 (dt,  $J$  = 147, 8.3 Hz, 4F, **F<sub>eq</sub>**).

**HR-EI-MS**  $m/z$  (calc.) = 328.0920 [ $M^{+}$ ];  $m/z$  (found) = 328.0920 [ $M^{+}$ ] ( $C_{14}H_{17}OF_5S$ ).

## 2-((Pentafluoro- $\lambda^6$ -sulfaneyl)-methyl)-2-phenyltetrahydrofuran (28)

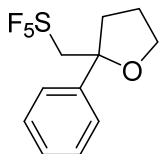

C<sub>11</sub>H<sub>13</sub>F<sub>5</sub>OS  
288,0607

The compound was prepared according to general procedure B. In a Young-type reaction tube 50.0  $\mu$ L (53.5 mg, 0.31 mmol, 1.00 eq.) of 3-phenylbut-3-en-1-ol was used. The compound was purified by column chromatography (silica, hexanes). The yield of the product was determined by analyzing the crude reaction mixture by means of <sup>19</sup>F-NMR spectroscopy (26%).

**Comment:** 3-Phenylbut-3-en-1-ol was prepared by Pd-catalyzed addition of phenylboronic acid to 4-pentynol. The product could be contaminated by 18% of non-separable but unreactive 4-phenylpent-3-en-1-ol (internal alkene). The given yield was corrected by the molar ratio of both species.

**<sup>1</sup>H NMR** (500 MHz, CDCl<sub>3</sub>)  $\delta$  = 7.40 (d, J=7.4, 2H, **CH<sub>Ar</sub>**), 7.35 (dd, J=8.6, 6.7, 2H, **CH<sub>Ar</sub>**), 7.28 (d, J=7.1, 1H, **CH<sub>Ar</sub>**), 4.24 – 3.92 (m, 4H, **CH<sub>2</sub>SF<sub>5</sub>** und **O-CH<sub>2</sub>**), 2.29 (dd, J=8.1, 6.5, 2H, **CH<sub>2</sub>-CH<sub>2</sub>-CH<sub>2</sub>**), 2.07 – 1.90 (m, 1H, **C<sub>q</sub>-CH<sub>2,dia</sub>**), 1.87 – 1.78 (m, 1H, **C<sub>q</sub>-CH<sub>2,dia</sub>**).

**<sup>13</sup>C NMR** (126 MHz, CDCl<sub>3</sub>)  $\delta$  = 143.69 (**C<sub>q,Ar</sub>**), 128.40 (**CH<sub>Ar</sub>**), 127.48 (**CH<sub>Ar</sub>**), 125.44 (**CH<sub>Ar</sub>**), 85.04 (**C<sub>q,Bridge</sub>**), 78.93 (q, J = 10.0, **CH<sub>2</sub>-SF<sub>5</sub>**), 68.65 (**O-CH<sub>2</sub>**), 38.75 (**CH<sub>2</sub>**), 25.14 (**C<sub>q</sub>-CH<sub>2</sub>**).

**<sup>19</sup>F NMR** (471 MHz, Chloroform-*d*)  $\delta$  84.56 (p, J = 148 Hz, 1F, **F<sub>ax</sub>**), 69.86 (dt, J = 147, 8.2 Hz, 4F, **F<sub>eq</sub>**).

**HR-EI-MS** m/z (calc.) = 288.0796 [**M<sup>+</sup>**]; m/z (found) = 288.0794 [**M<sup>+</sup>**] (C<sub>11</sub>H<sub>13</sub>F<sub>5</sub>OS).

## 2-(Pentafluoro- $\lambda^6$ -sulfaneyl)-1,1-diphenylethan-1-ol (29)

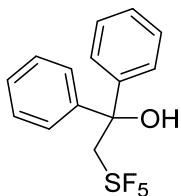

C<sub>14</sub>H<sub>13</sub>F<sub>5</sub>OS  
324,0607

The compound was prepared according to a modified general procedure A. In a Young-type reaction tube 26.0  $\mu$ L (26.5 mg, 0.148 mmol, 1.00 eq.) of diphenylethylene **2** as well as 229  $\mu$ L (220 mg, 2.00 mmol, 13.6 eq.) of 1-ethynylcyclopentanol were used. The compound was purified by column chromatography (silica, hexanes to DCM). The yield of the product was determined by analyzing the crude reaction mixture by means of <sup>19</sup>F-NMR spectroscopy (13%).

**<sup>1</sup>H NMR** (500 MHz, Chloroform-*d*)  $\delta$  7.53 – 7.44 (m, 4H, CH<sub>Ar</sub>), 7.41 – 7.33 (m, 4H, CH<sub>Ar</sub>), 7.32 – 7.26 (m, 2H, CH<sub>Ar</sub>), 4.49 (p, *J* = 8.2 Hz, 2H, **CH2-SF5**), 3.04 (s, 1H, OH).

**<sup>13</sup>C NMR** (126 MHz, Chloroform-*d*)  $\delta$  143.60 (C<sub>q,Ar</sub>), 128.74 (CH<sub>Ar</sub>), 128.03 (CH<sub>Ar</sub>), 125.70 (CH<sub>Ar</sub>), 79.89 (p, *J* = 8.0 Hz), 78.22.

**<sup>19</sup>F NMR** (471 MHz, Chloroform-*d*)  $\delta$  85.06 (p, *J* = 150 Hz, 1F, **F<sub>ax</sub>**), 71.41 (dt, *J* = 147, 8.3 Hz, 4F, **F<sub>eq</sub>**).

**HR-EI-MS** *m/z* (calc.) = 324.0607 [M<sup>+</sup>]; *m/z* (found) = 324.0606 [M<sup>+</sup>] (C<sub>14</sub>H<sub>13</sub>OF<sub>5</sub>S).



Elimination of ROH by **8** and **9** to prepare **30** and **31**

**Pentafluoro-(2-phenylallyl)- $\lambda^6$ -sulfane (**30**)**

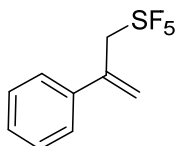

C<sub>9</sub>H<sub>9</sub>F<sub>5</sub>S  
244,2230

In a borosilicate NMR tube 5.2 mg (19  $\mu$ mol, 1.00 eq.) of **8** were suspended in 400  $\mu$ L CDCl<sub>3</sub>. Then 23.8  $\mu$ L (188  $\mu$ mol, 10.0 eq.) of BF<sub>3</sub>·OEt were added. The tube was sealed with parafilm and the reaction mixture was shaken vigorously. Then the reaction progress was monitored by <sup>19</sup>F-NMR over a period of 27 min when the starting material was fully converted to the product. The yield of the product was determined by means of <sup>19</sup>F-NMR spectroscopy (>98%). The identity of the product was confirmed by means of <sup>1</sup>H-NMR, <sup>19</sup>F-NMR as well as HSQC<sub>ed</sub> and <sup>1</sup>H-<sup>13</sup>C-HMBC spectroscopy and corresponds to **30** which NMR spectroscopic data after purification previously was reported by our group and is given below.<sup>[S7]</sup>

**(2,2-Diphenylvinyl)pentafluoro- $\lambda^6$ -sulfane (31)**

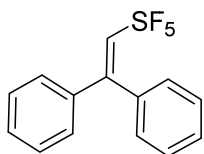

C<sub>14</sub>H<sub>11</sub>F<sub>5</sub>S  
306,2940

In a borosilicate NMR tube 6.4 mg (19  $\mu$ mol, 1.00 eq.) of **9** was suspended in 400  $\mu$ L CDCl<sub>3</sub>. Then 23.8  $\mu$ L (188  $\mu$ mol, 10.0 eq.) of BF<sub>3</sub>·OEt were added. The tube was sealed with parafilm and the reaction mixture was shaken vigorously. Then the reaction progress was monitored by <sup>19</sup>F-NMR over a period of 17 min when the starting material was fully converted to the product. The yield of the product was determined by means of <sup>19</sup>F-NMR spectroscopy (>99%). The identity of the product was confirmed by means of <sup>1</sup>H-NMR and <sup>19</sup>F-NMR as well as HSQC<sub>ed</sub> and <sup>1</sup>H-<sup>13</sup>C-HMBC spectroscopy and corresponds to **31** as previously reported.<sup>[S7]</sup>

### Preparation of the (2-azido-2-phenylpropyl)pentafluoro- $\lambda^6$ -sulfane (32)

**Caution:** TMS-CN and TMS-N<sub>3</sub> are highly toxic compounds and can lead to serious injury or fatality. All manipulations have been carried out under a well ventilated fumehood or have been handled in a sealed container. Gold cyanide compounds are potentially explosive compounds. While having an huge excess of TMSCN present in the reaction mixture, formation of the relatively stable Au(N<sub>3</sub>)<sub>4</sub><sup>-</sup> anion was likely in the case of formation of azide complexes. The reactions have been carried out behind a blast shield as far as possible. The solutions have never been concentrated to dryness but have been distributed between 1 M potassium hydroxide solution and diethyl ether or dichloromethane. The aqueous phases finally have been disposed by treatment with freshly prepared nitrous acid as soon as possible while the organic phase has been concentrated under reduced pressure and purified by column chromatography.

**(2-azido-2-phenylpropyl)pentafluoro- $\lambda^6$ -sulfane (32)**

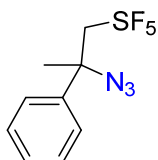

$C_9H_{10}F_5N_3S$   
287,0516

In a borosilicate NMR tube 6.8 mg (25  $\mu$ mol, 1.00 eq.) of **8** were suspended in 500  $\mu$ L  $CD_2Cl_2$ . Then 5.4 mg of  $HAuCl_4 \cdot 3H_2O$  (17  $\mu$ mol, 71 mol%) were added. Finally 50.0  $\mu$ L (377  $\mu$ mol, 15.1 eq.) of TMS- $N_3$  were added while the reaction mixture turned orange. The tube was sealed with parafilm and the reaction mixture was shaken vigorously. Then the reaction progress was monitored by  $^{19}F$ -NMR over a period of 5 h. A control NMR analysis was finally performed after additional 12 h. The yield of the reaction product was purified by column chromatography (silica, cyclohexane,  $R_f = 0.5$ ). The product was obtained as colorless oil and was characterized by NMR spectroscopy.

$^1H$  NMR (500 MHz, Chloroform-*d*)  $\delta$  7.52 – 7.44 (m, 2H,  $CH_{Ar}$ ), 7.45 – 7.38 (m, 2H,  $CH_{Ar}$ ), 7.38 – 7.32 (m, 1H,  $CH_{Ar}$ ), 3.92 (p,  $J = 8.4$  Hz, 2H,  $CH_2SF_5$ ), 1.96 (s, 3H,  $CH_3$ ).

$^{13}C$  NMR (126 MHz, Chloroform-*d*)  $\delta$  140.86 ( $C_{q,Ar}$ ), 129.11 ( $CH_{Ar}$ ), 128.64 ( $CH_{Ar}$ ), 125.70 ( $CH_{Ar}$ ), 79.10 (p,  $J = 11.2$  Hz,  $CH_2SF_5$ ), 64.95 ( $C_qN_3$ ), 24.36 (p,  $J = 2.2$  Hz,  $CH_3$ ).

$^{19}F$  NMR (471 MHz, Chloroform-*d*)  $\delta$  83.52 (p,  $J = 147$  Hz, 1F,  $F_{ax}$ ), 69.60 (dt,  $J = 147$ , 8.6 Hz, 4F,  $F_{eq}$ ).

**GC-EI-MS**  $m/z$  (calc.) = 287.1 [ $M^{++}$ ];  $m/z$  (found) = 287.0 [ $M^{++}$ ].

**HR-EI-MS**  $m/z$  (calc.) = 287.0516 [ $M^{++}$ ];  $m/z$  (found) = 287.0513 [ $M^{++}$ ];  $m/z$  (calc.) = 245.0423 [ $M-N_3^{++}$ ] ( $C_9H_{10}F_5N_3S$ );  $m/z$  (found) = 245.0422 [ $M-N_3^{++}$ ] ( $C_9H_{10}F_5S$ ).

## NMR kinetics of elimination reactions

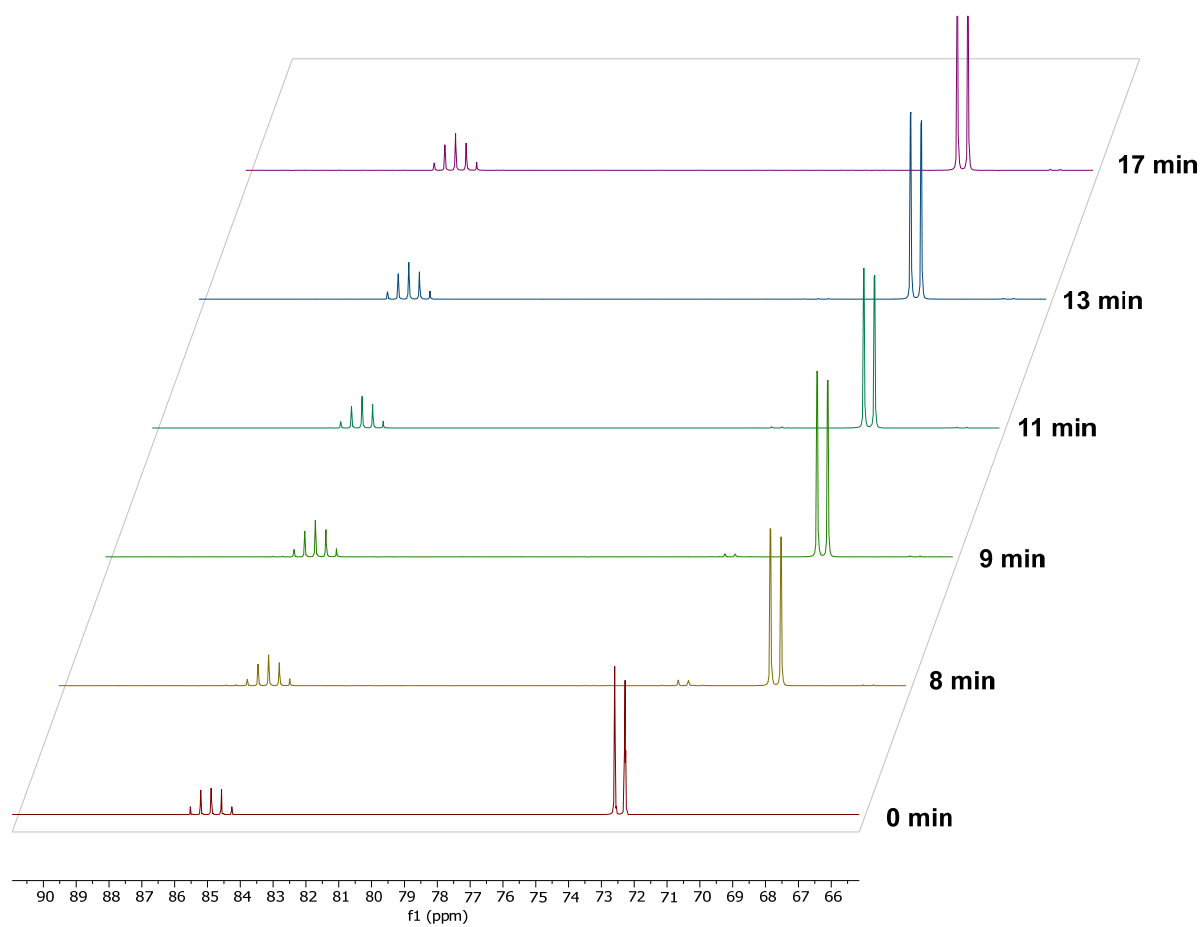

**Fig. S3**

Time resolved  $^{19}\text{F}$ -NMR spectra of elimination reaction of **9** to **31**.

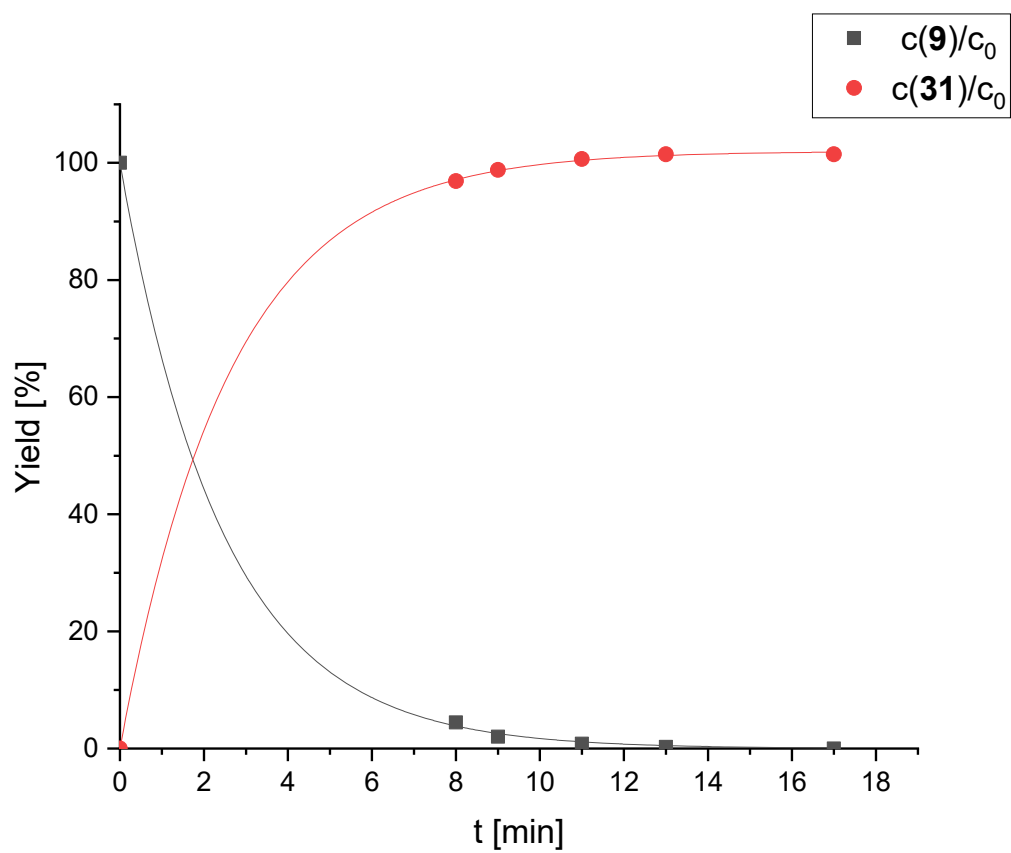

**Fig. S4**

Plot of the  $^{19}\text{F}$ -NMR integrals of product **9** and **31** vs. time.

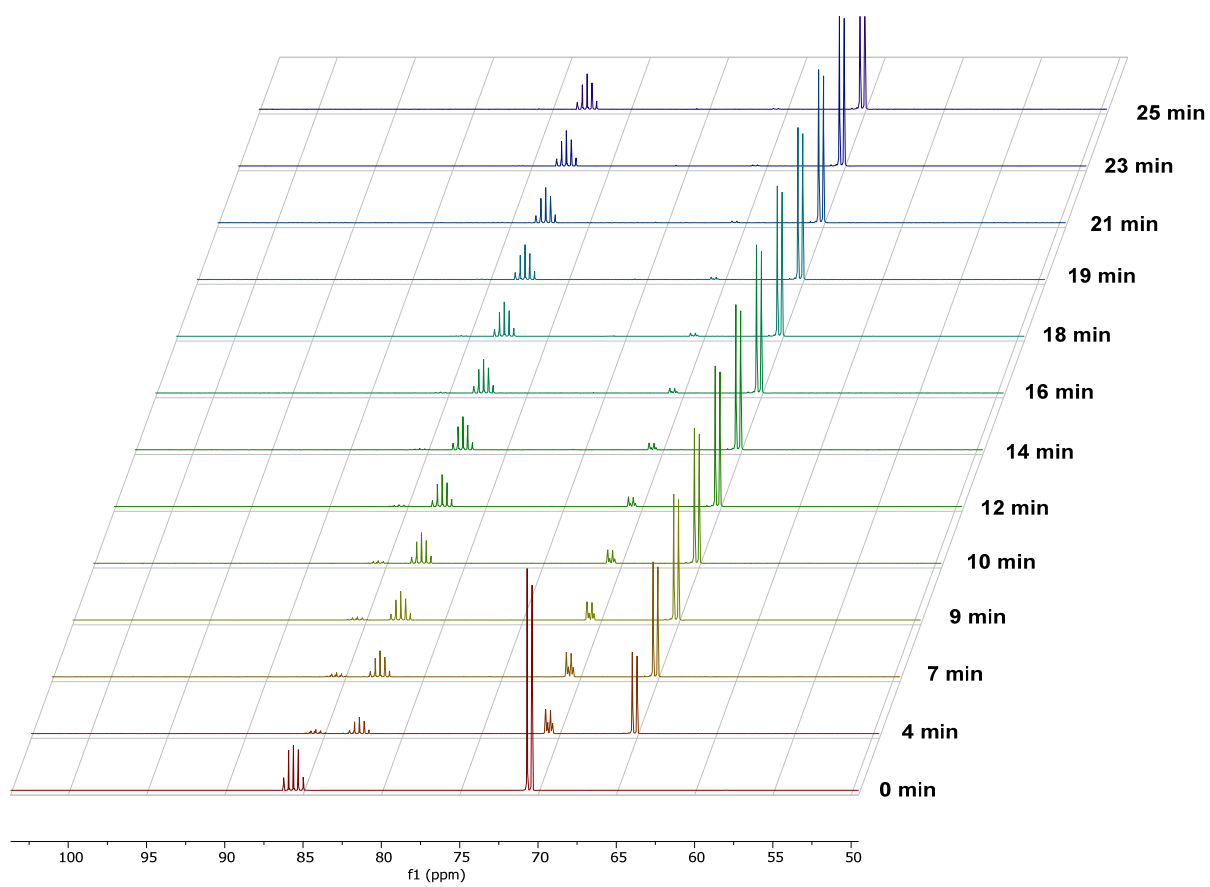

**Fig. S5**

Time resolved  $^{19}\text{F}$ -NMR spectra of elimination reaction of **8** to **30**.

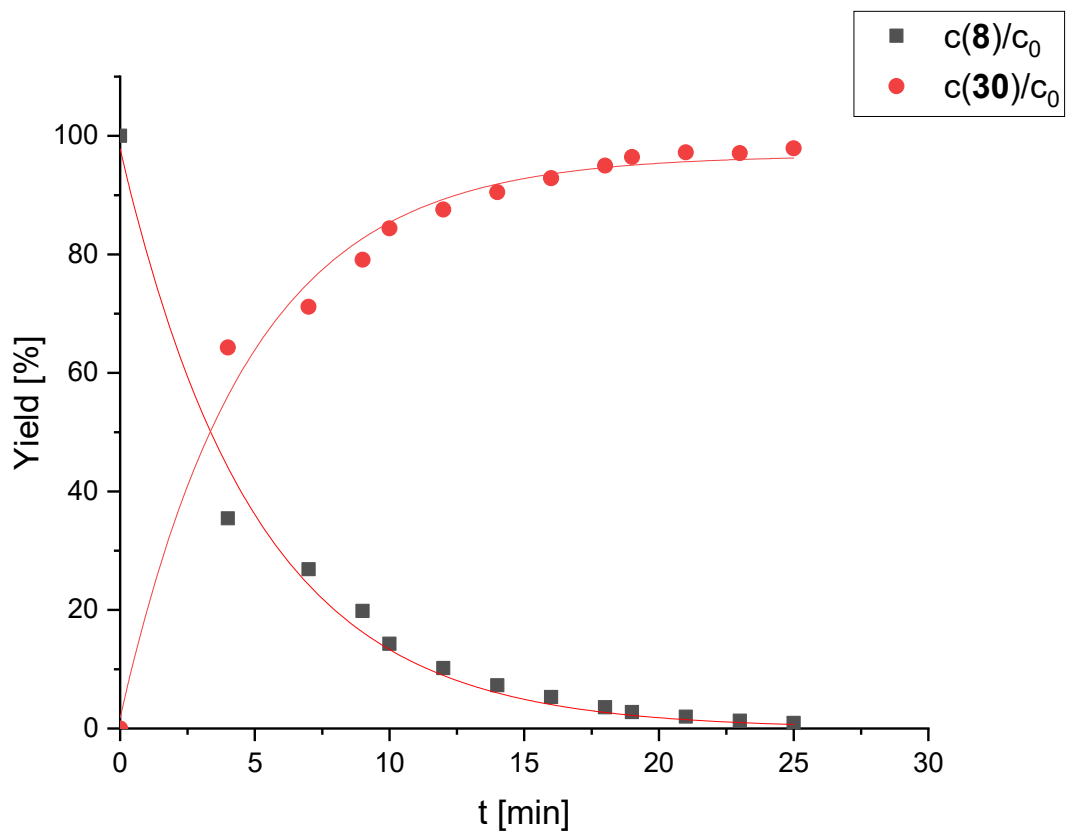

**Fig. S6**

Plot of the  $^{19}\text{F}$ -NMR integrals of product **8** and **30** vs. time.



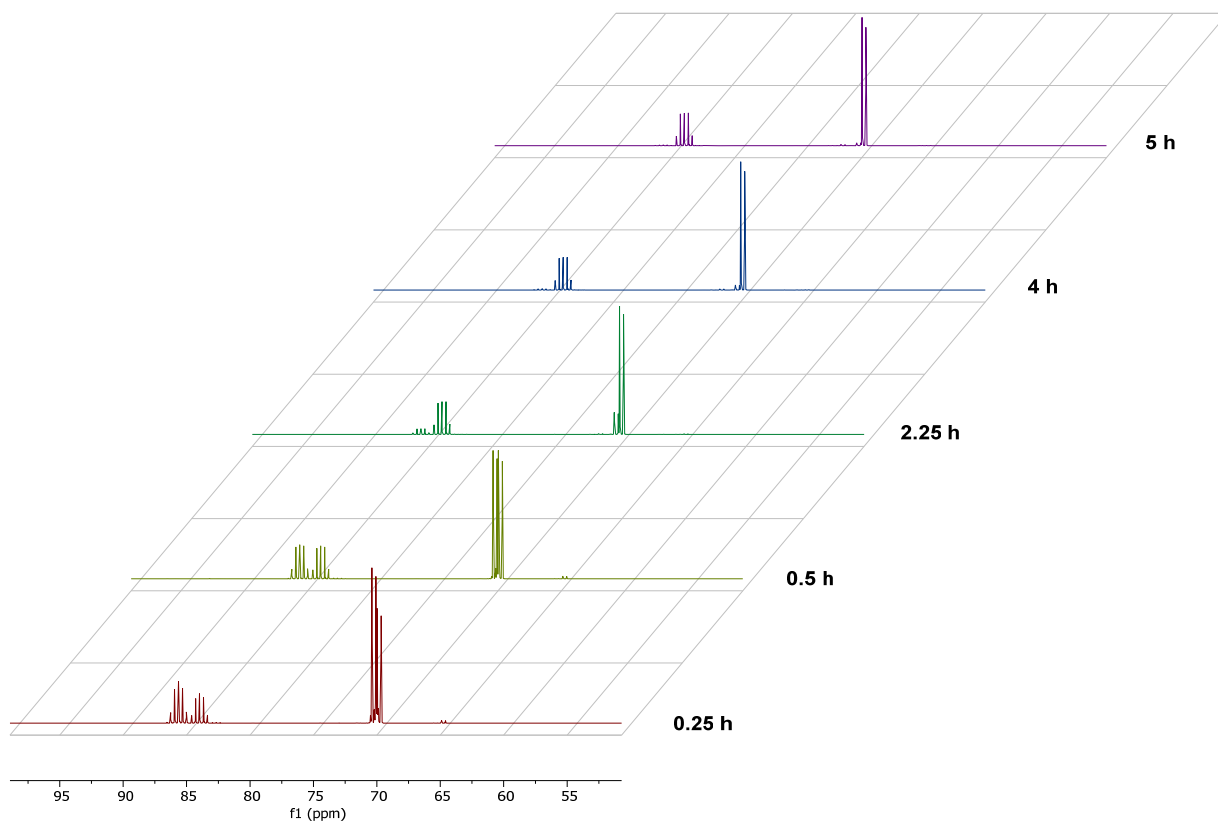

**Fig. S7**

Time resolved  $^{19}\text{F}$ -NMR spectra of azidation reaction of **8** to **32**.

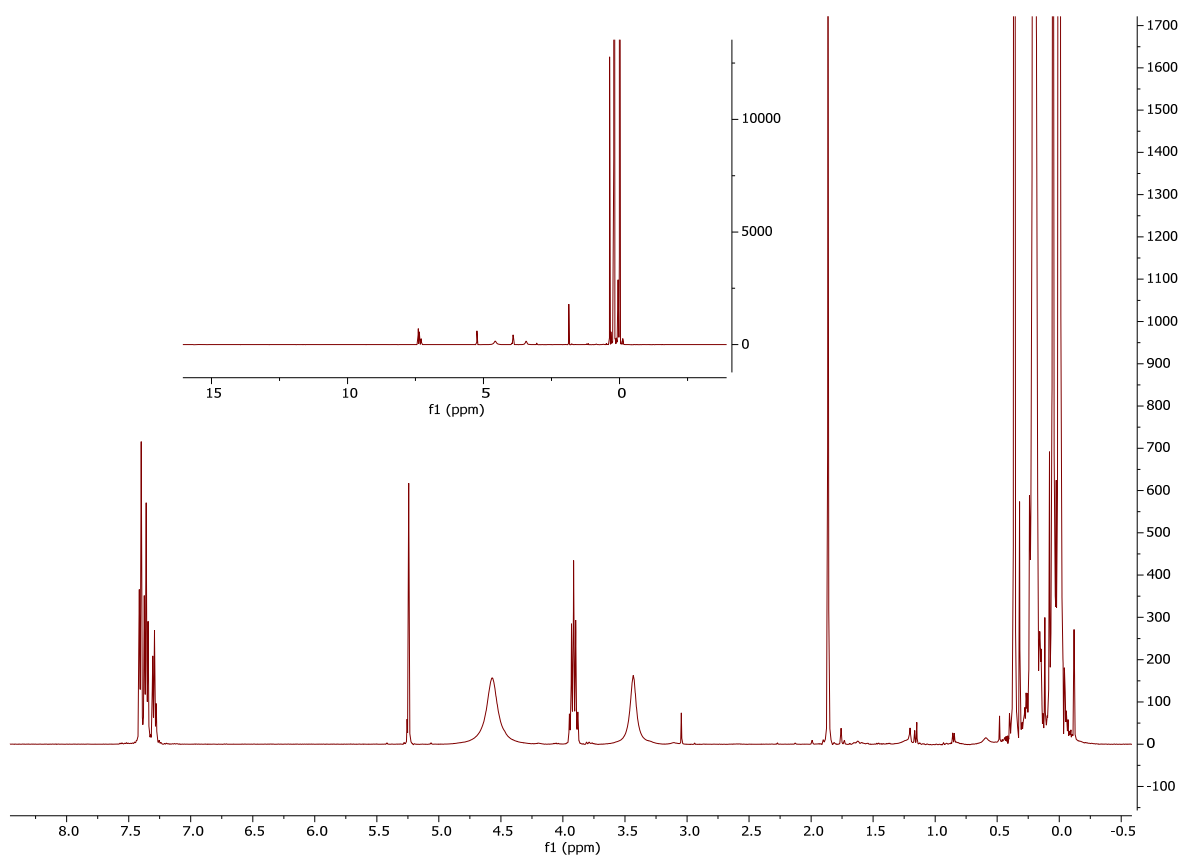

**Fig. S8**

$^1\text{H-NMR}$  of the crude reaction mixture of the azidation reaction of **8** to **32** after 17h.

## NMR spectroscopic characterisations

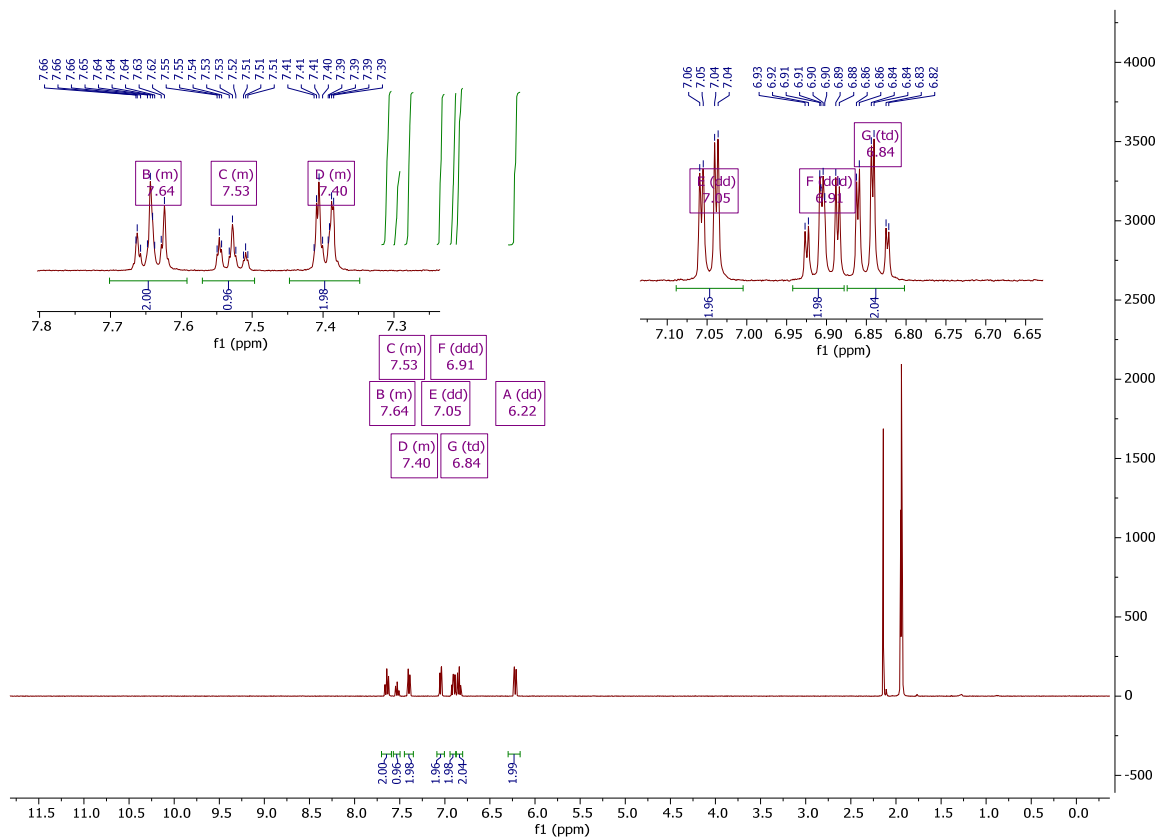

**Fig. S9**

<sup>1</sup>H-NMR spectrum of 10-phenyl-10*H*-phenothiazine (**3**) in MeCN-*d*<sup>3</sup>.

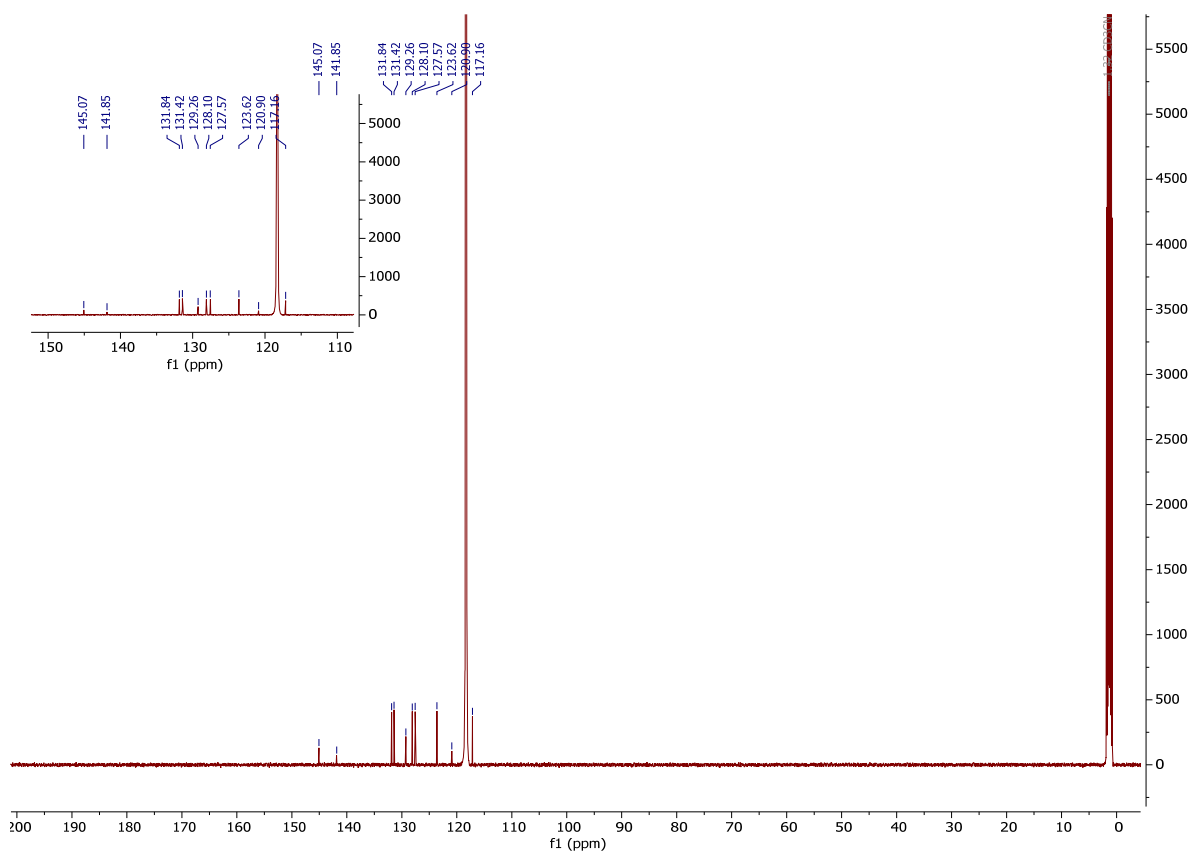

**Fig. S10**

$^{13}\text{C}$ -NMR spectrum of 10-phenyl-10*H*-phenothiazine (**3**) in  $\text{MeCN-d}^3$ .

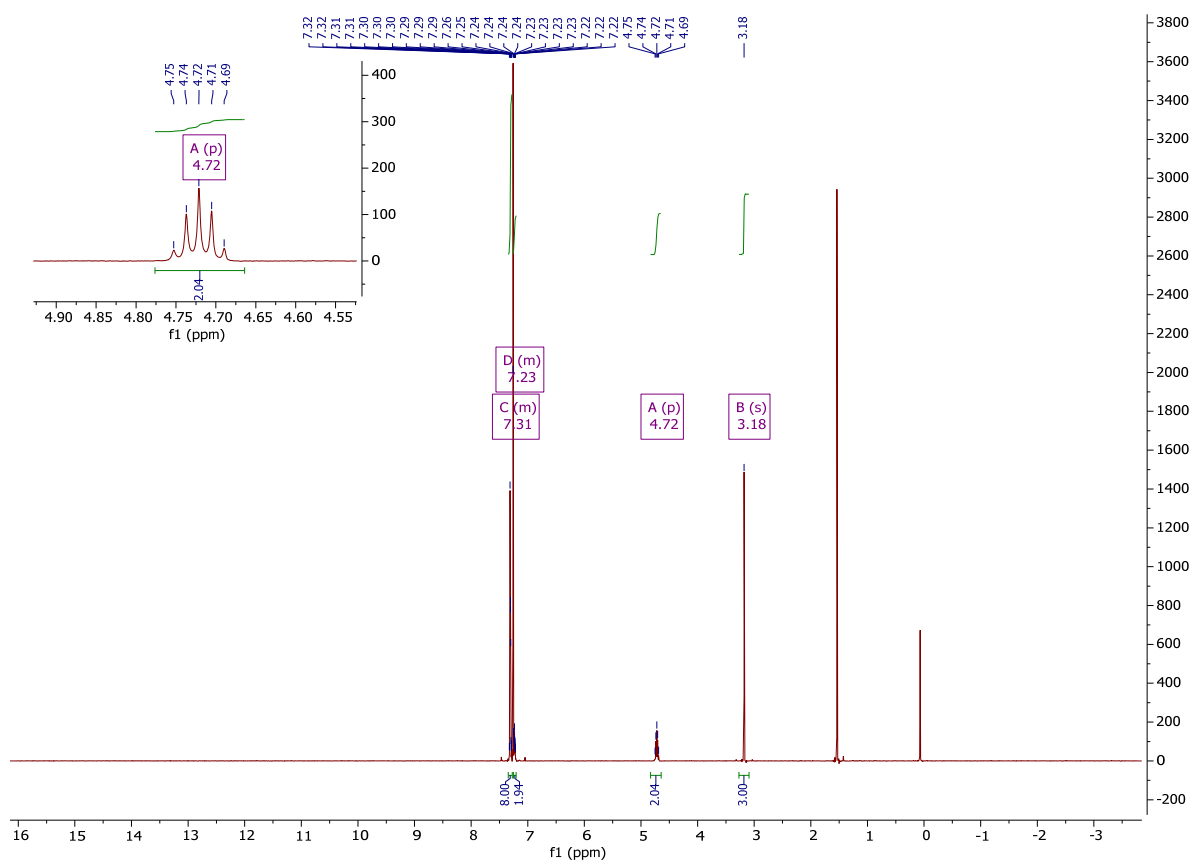

**Fig. S11**

$^1\text{H-NMR}$  spectrum of pentafluoro(2-methoxy-2,2-diphenylethyl)- $\lambda^6$ -sulfane (**9**) in  $\text{CDCl}_3$ .

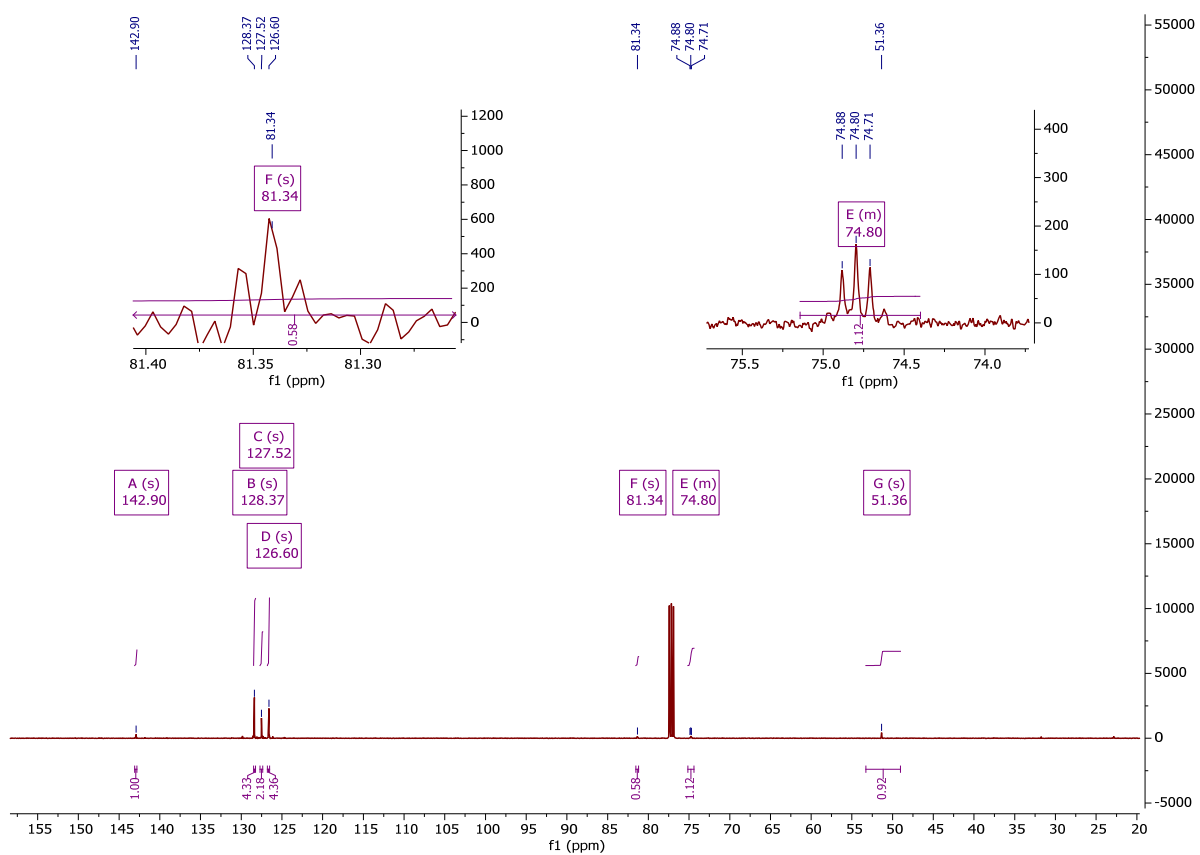

**Fig. S12**

$^{13}\text{C}$ -NMR spectrum of pentafluoro(2-methoxy-2,2-diphenylethyl)- $\lambda^6$ -sulfane (**9**) in  $\text{CDCl}_3$ .

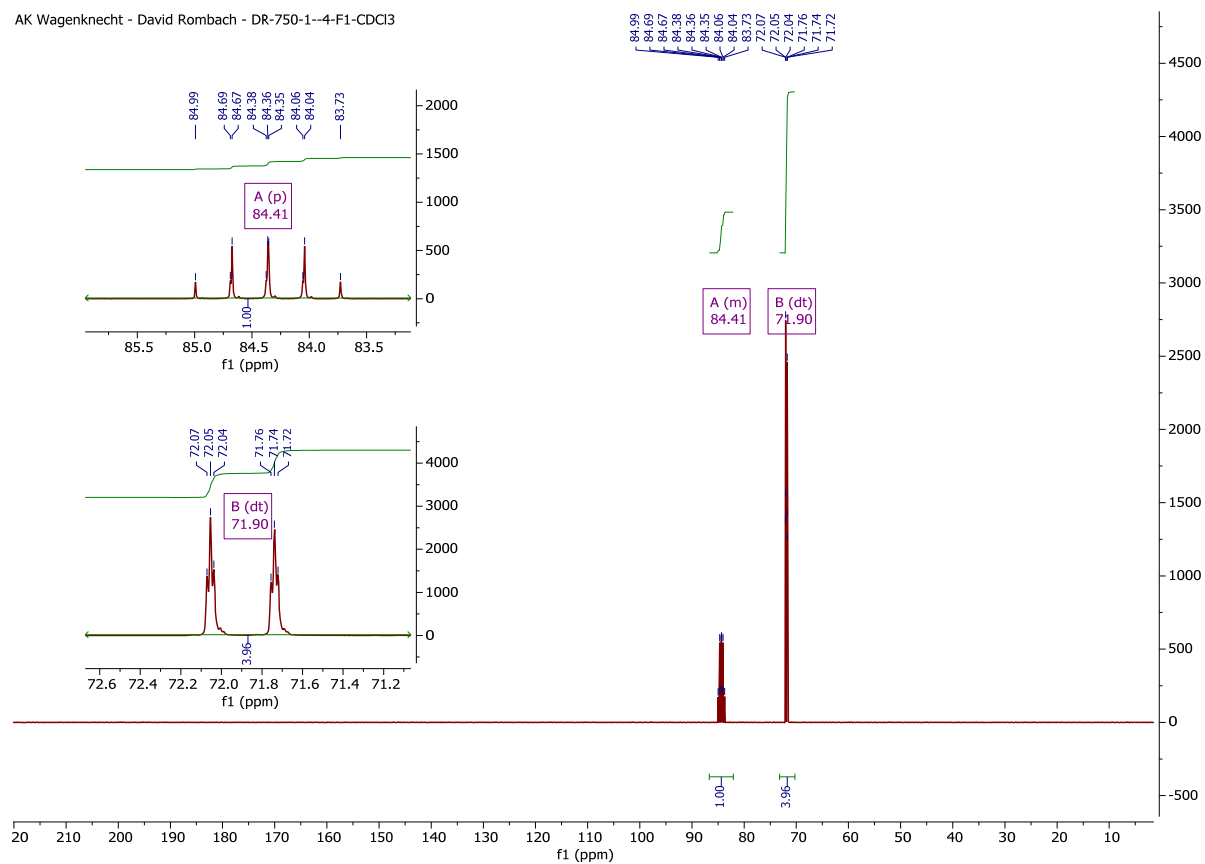

**Fig. S13**

$^{19}\text{F}$ -NMR spectrum of pentafluoro(2-methoxy-2,2-diphenylethyl)- $\lambda^6$ -sulfane (**9**) in  $\text{CDCl}_3$

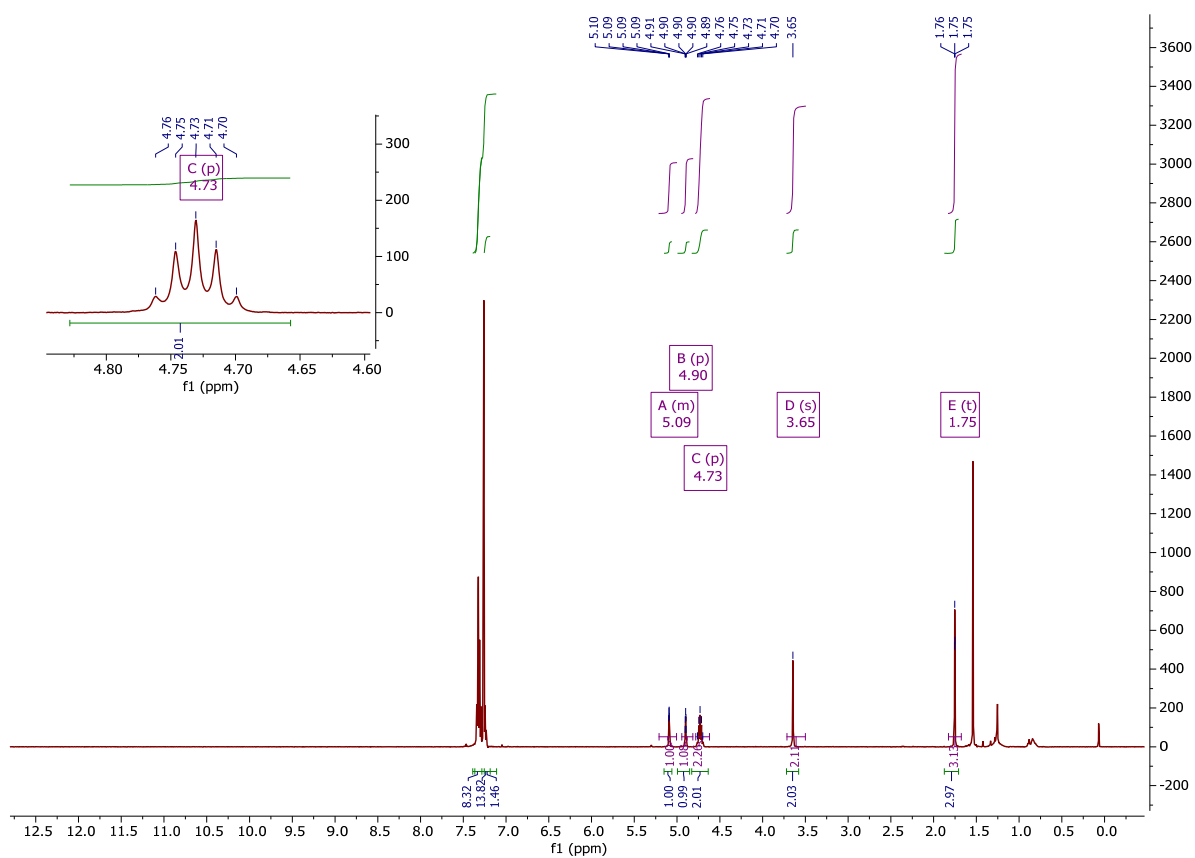

**Fig. S14**

$^1\text{H}$  - NMR spectrum of (2,2-diphenyl-2-(prop-1-en-2-yloxy)ethyl)pentafluoro- $\lambda^6$ -sulfane (**10**) in  $\text{CDCl}_3$ .



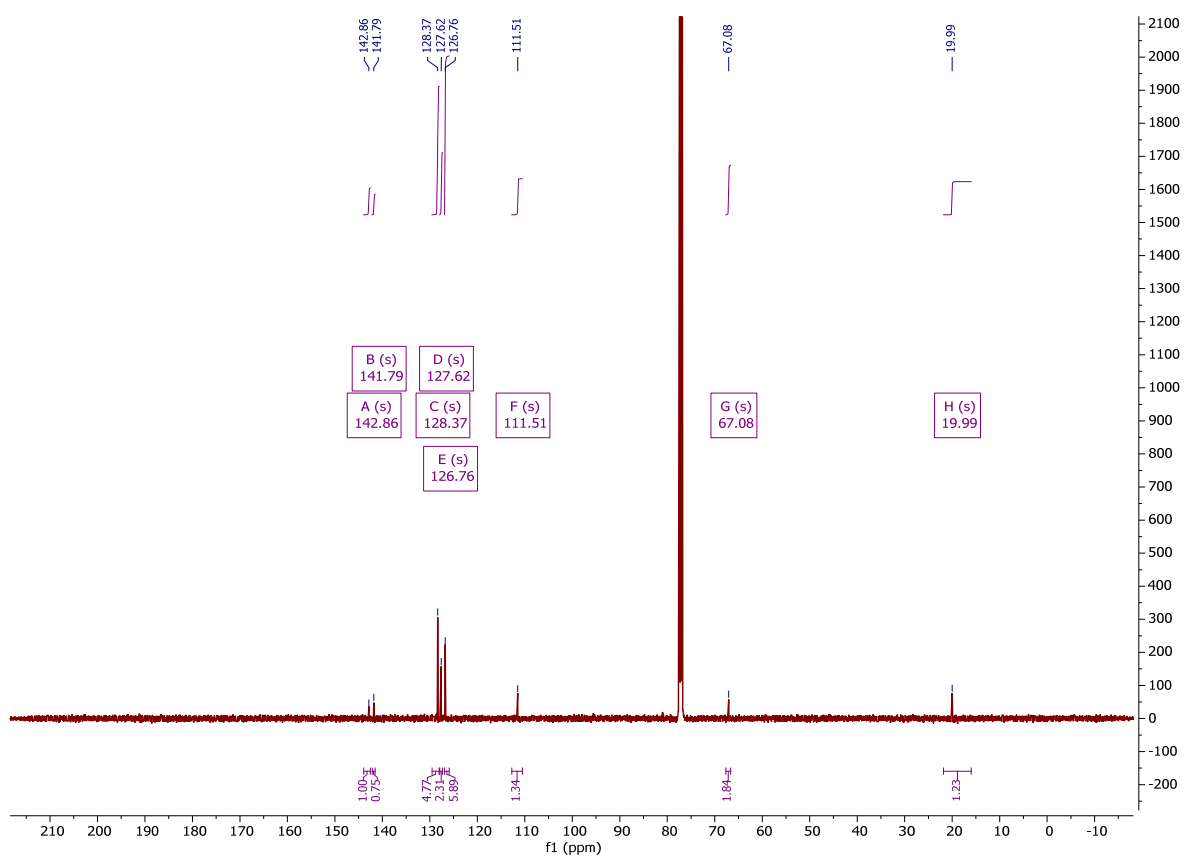

**Fig. S15**

<sup>13</sup>C - NMR spectrum of (2,2-diphenyl-2-(prop-1-en-2-yloxy)ethyl)pentafluoro- $\lambda^6$ -sulfane (**10**) in CDCl<sub>3</sub>.

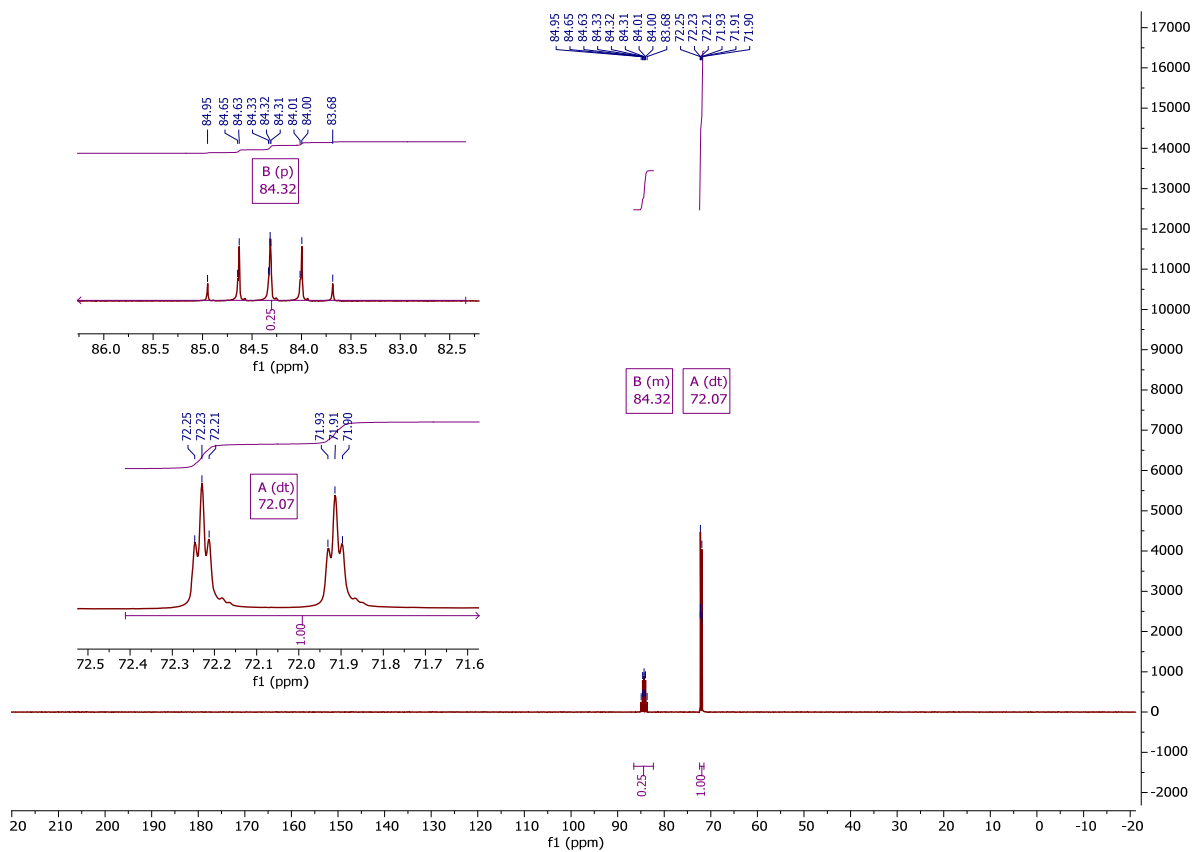

**Fig. S16**

$^{19}\text{F}$ -NMR spectrum of (2,2-diphenyl-2-(prop-1-en-2-yloxy)ethyl)pentafluoro- $\lambda^6$ -sulfane (**10**) in  $\text{CDCl}_3$ .

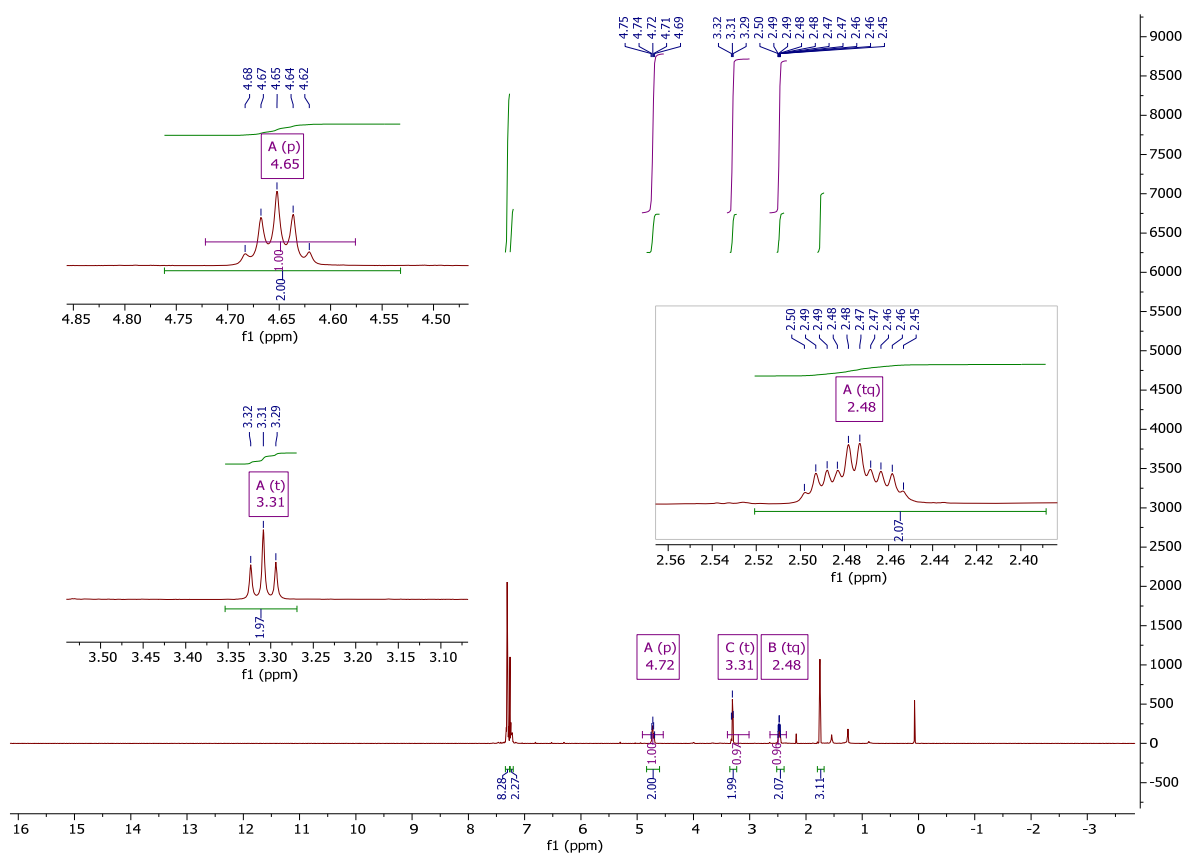

**Fig. S17**

$^1\text{H-NMR}$  spectrum of pentafluoro(2-(pent-3-yn-1-yloxy)-2,2-diphenylethyl)- $\lambda^6$ -sulfane (**11**) in  $\text{CDCl}_3$ .

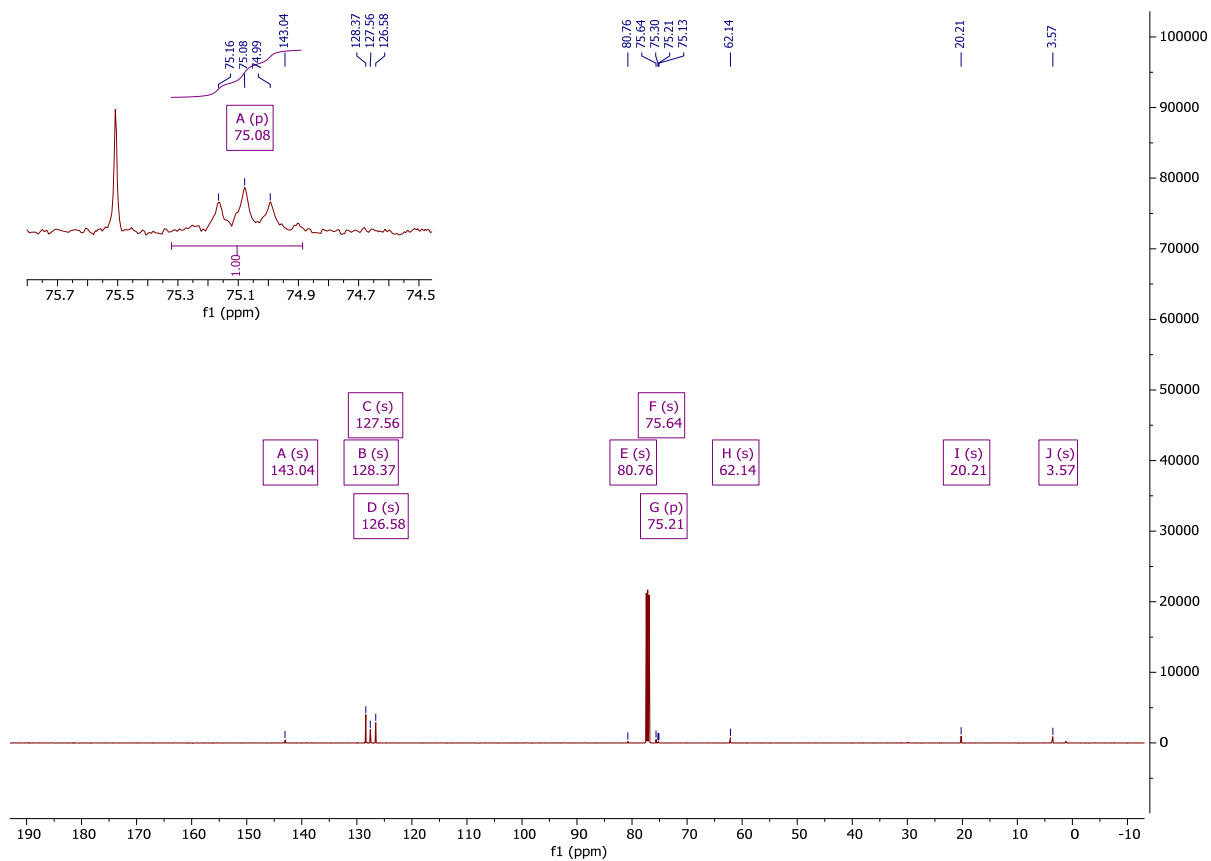

**Fig. S18**

$^{13}\text{C}$ -NMR spectrum of pentafluoro(2-(pent-3-yn-1-yloxy)-2,2-diphenylethyl)- $\lambda^6$ -sulfane (11) in  $\text{CDCl}_3$ .

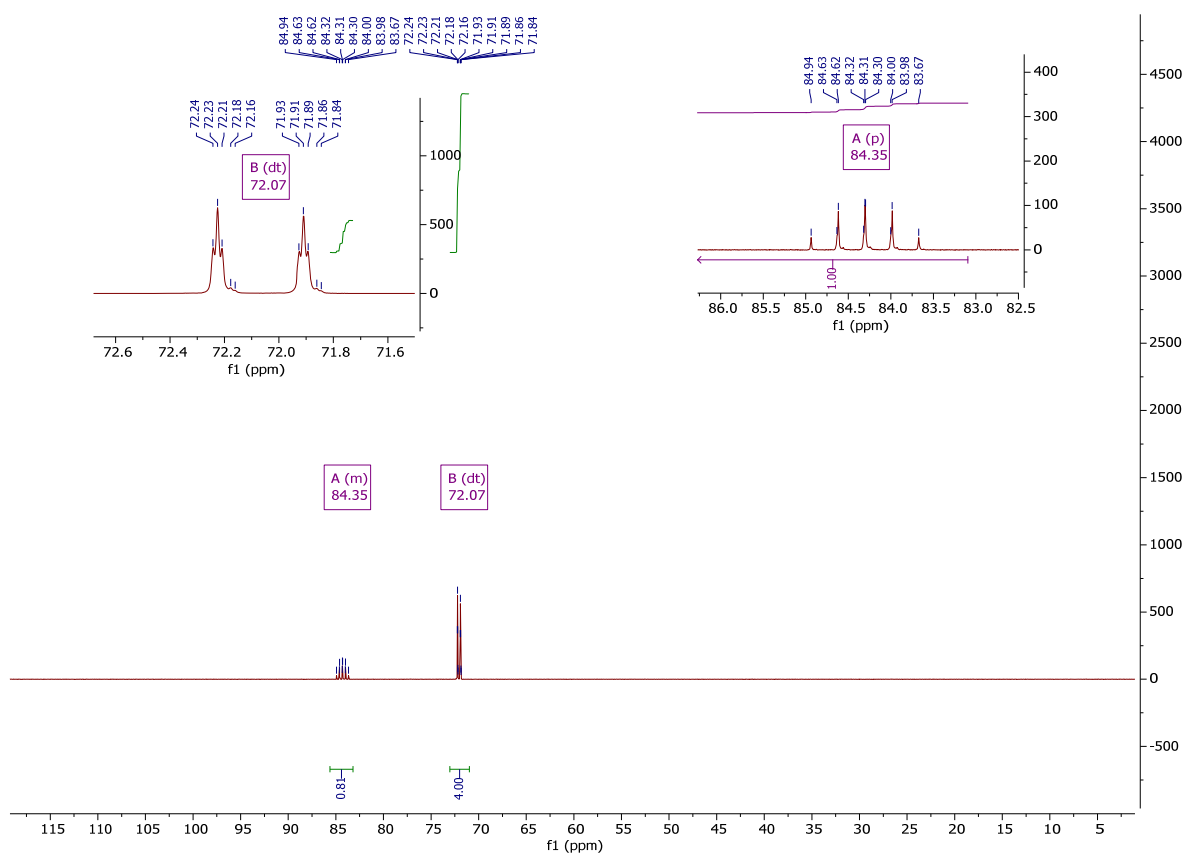

**Fig. S19**

$^{19}\text{F}$ -NMR spectrum of pentafluoro(2-(pent-3-yn-1-yloxy)-2,2-diphenylethyl)- $\lambda^6$ -sulfane (**11**) in  $\text{CDCl}_3$ .

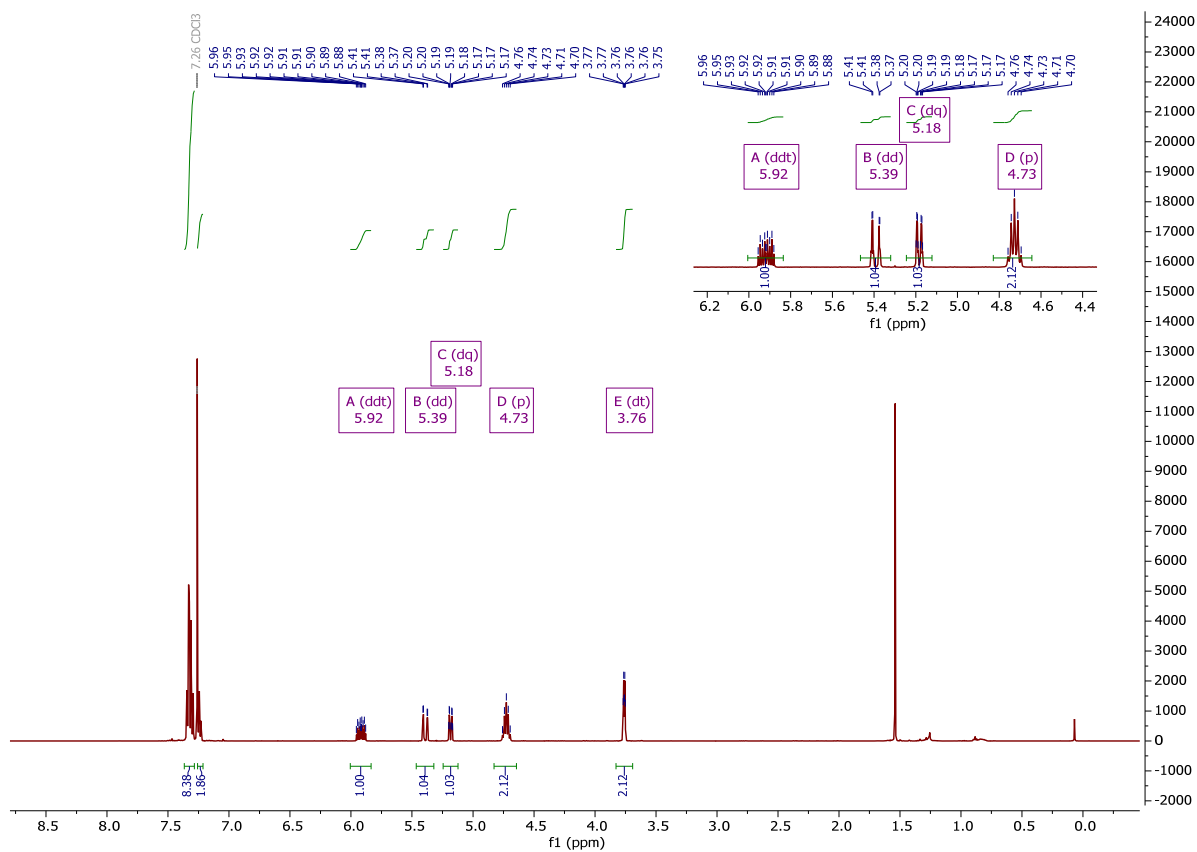

**Fig. S20**

<sup>1</sup>H-NMR spectrum of (2-(allyloxy)-2,2-diphenylethyl)pentafluoro-λ<sup>6</sup>-sulfane (**12**) in CDCl<sub>3</sub>.

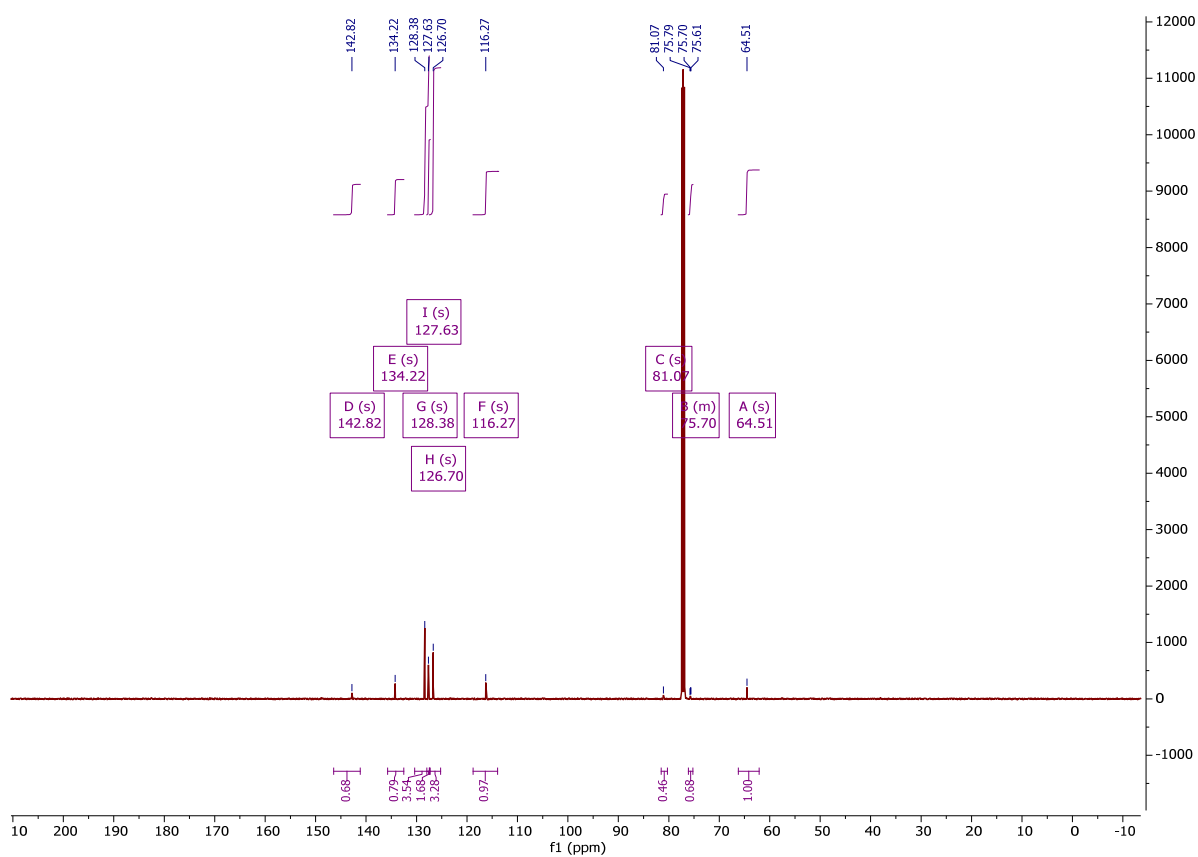

**Fig. S21**

<sup>13</sup>C-NMR spectrum of (2-(allyloxy)-2,2-diphenylethyl)pentafluoro-λ<sup>6</sup>-sulfane (**12**) in CDCl<sub>3</sub>.

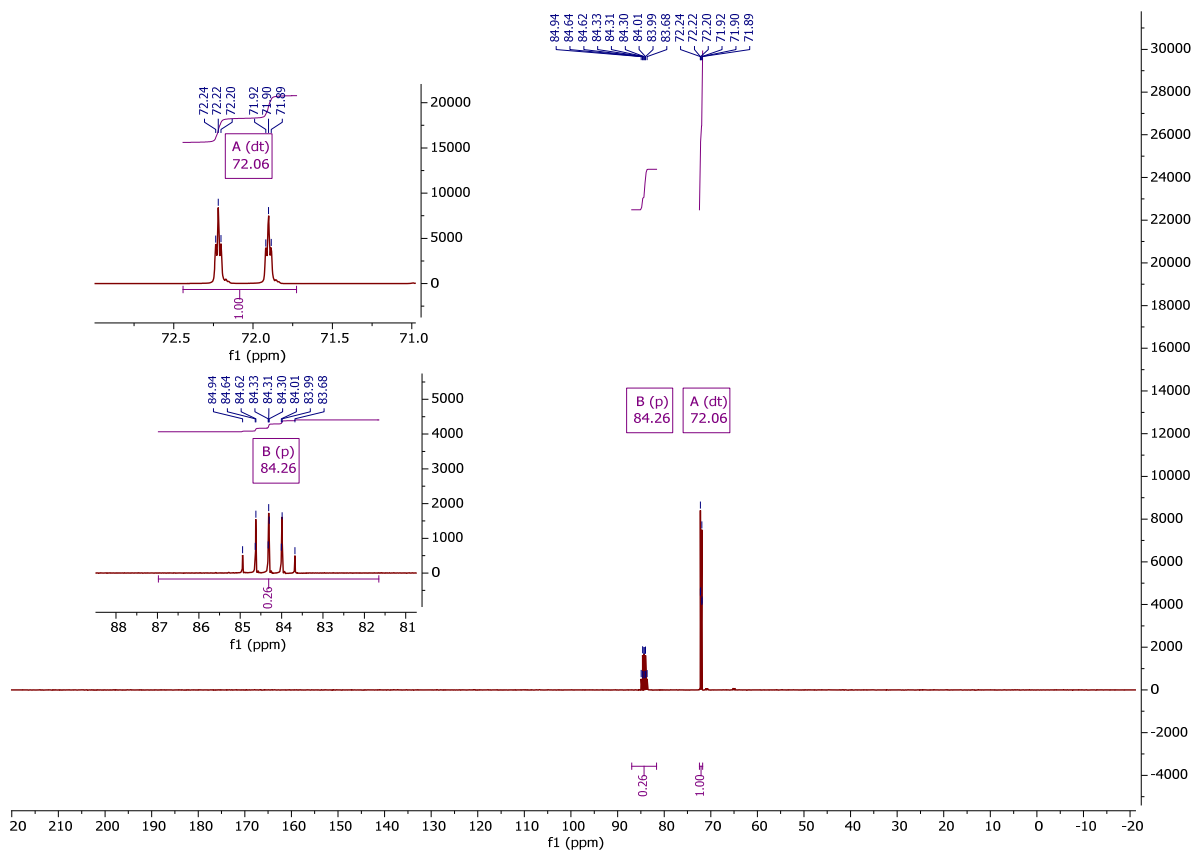

**Fig. S22**

$^{19}\text{F}$ -NMR spectrum of (2-(allyloxy)-2,2-diphenylethyl)pentafluoro- $\lambda^6$ -sulfane (**12**) in  $\text{CDCl}_3$ .



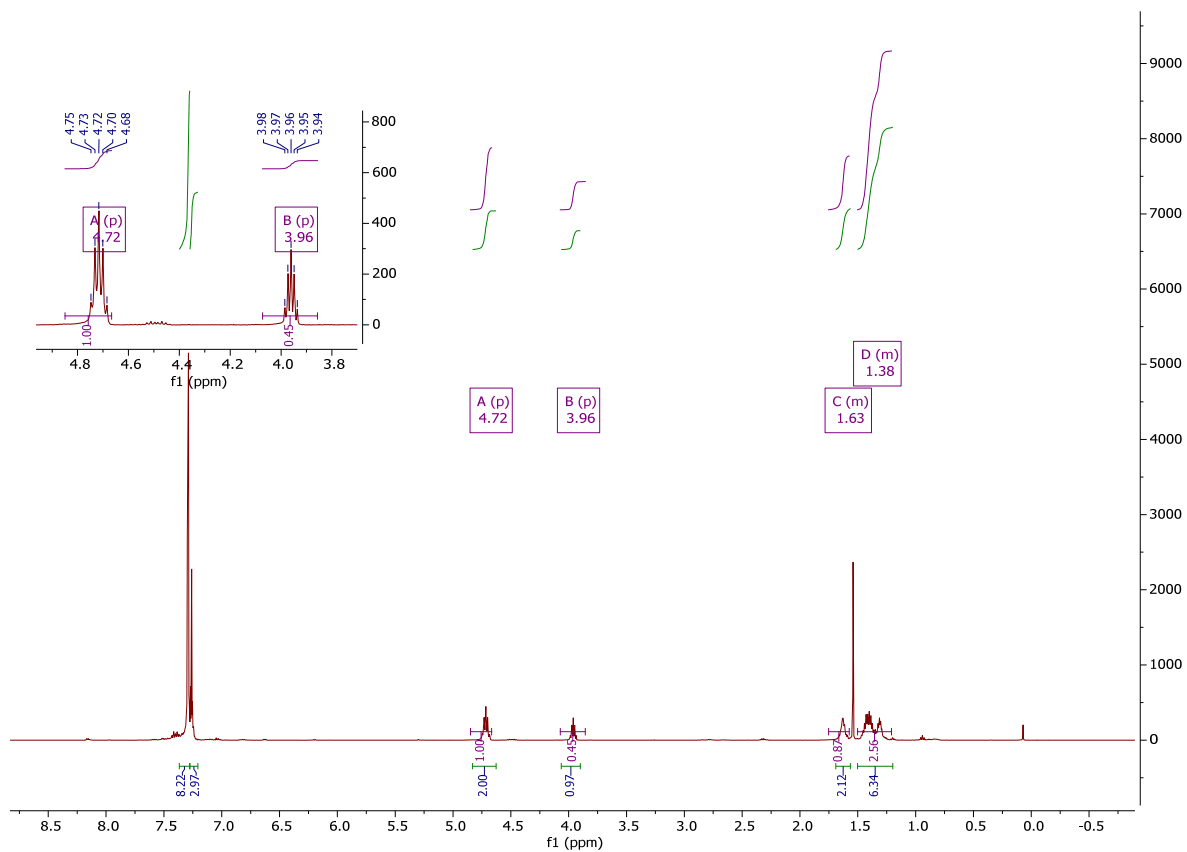

**Fig. S23**

$^1\text{H-NMR}$  spectrum of (2-(cyclopentyloxy)-2,2-diphenylethyl)pentafluoro- $\lambda^6$ -sulfane (**13**) in  $\text{CDCl}_3$ .

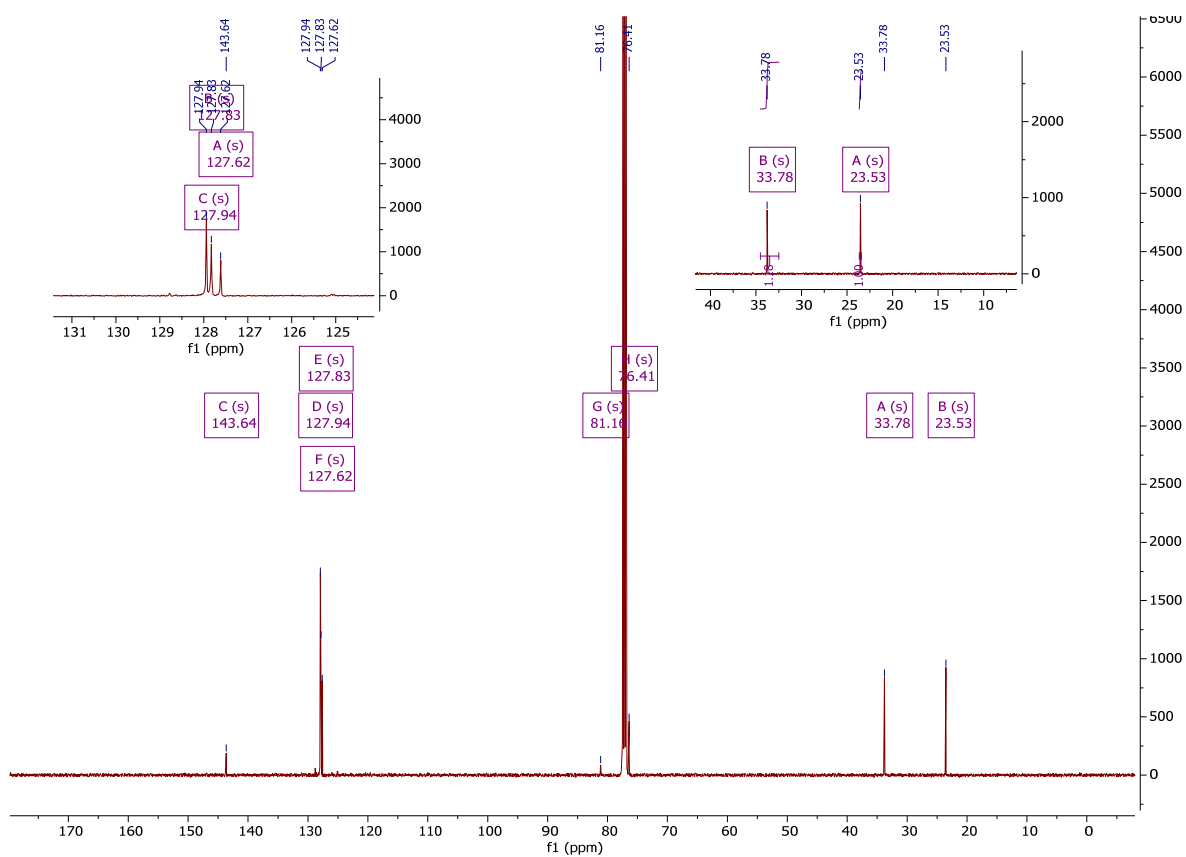

**Fig. S24**

$^{13}\text{C}$ -NMR spectrum of (2-(cyclopentyloxy)-2,2-diphenylethyl)pentafluoro- $\lambda^6$ -sulfane (**13**) in  $\text{CDCl}_3$ .

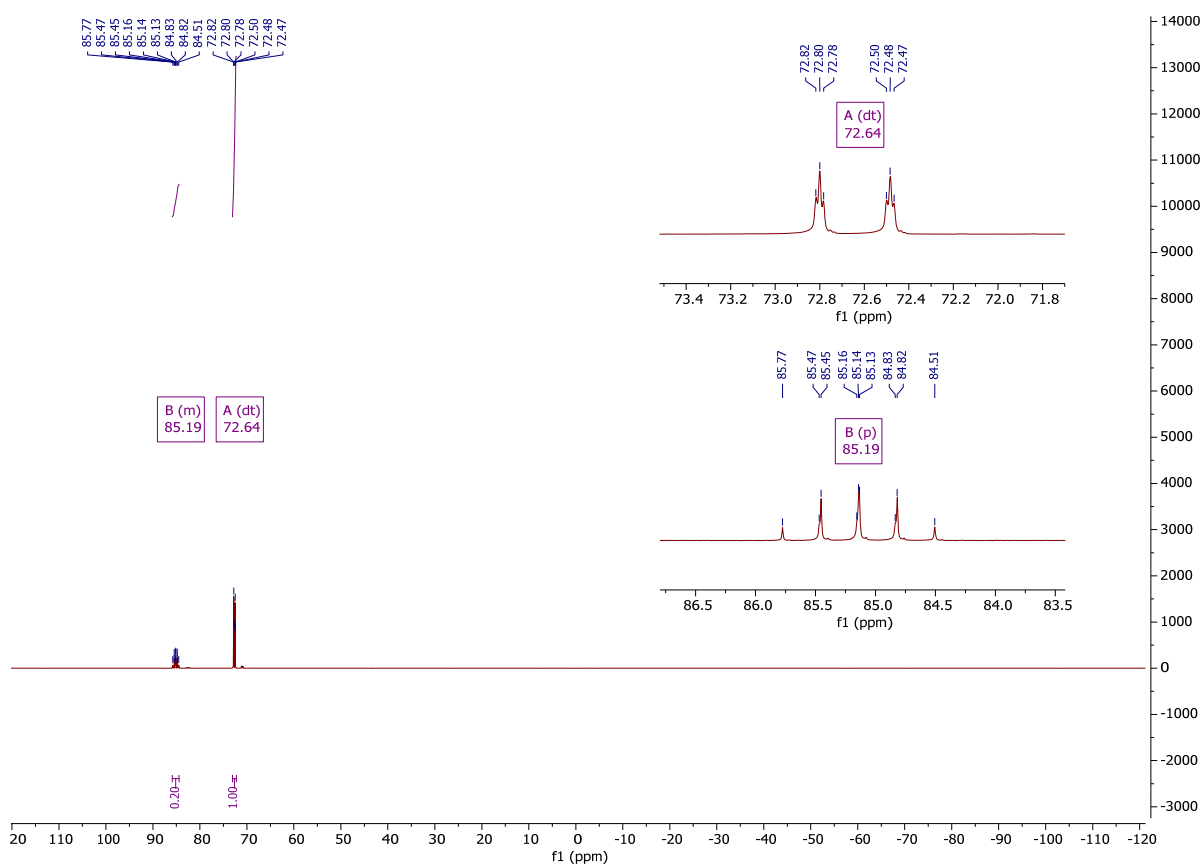

**Fig. S25**

$^{19}\text{F}$ -NMR spectrum of (2-(cyclopentyloxy)-2,2-diphenylethyl)pentafluoro- $\lambda^6$ -sulfane (**13**) in  $\text{CDCl}_3$ .

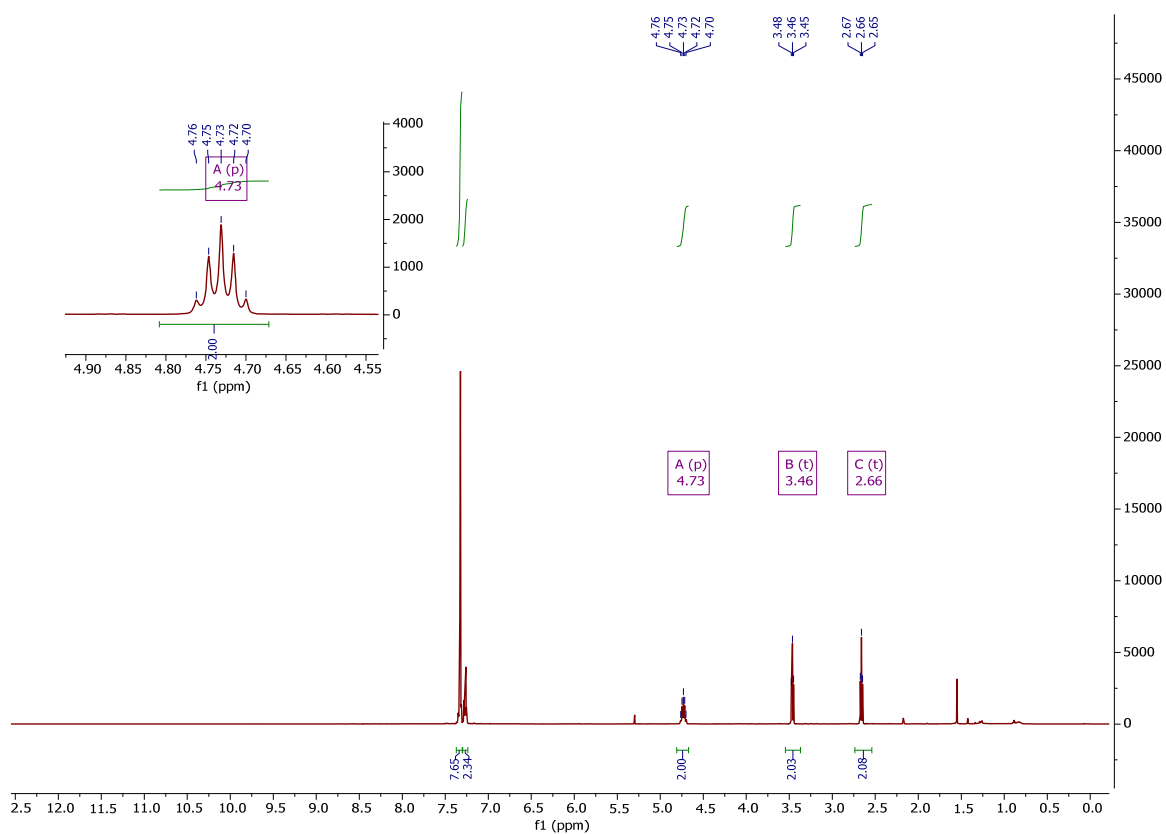

**Fig. S26**

<sup>1</sup>H-NMR spectrum of 3-(2-(pentafluoro- $\lambda^6$ -sulfaneyl)-1,1-diphenylethoxy)propanenitrile (**14**) in CDCl<sub>3</sub>.

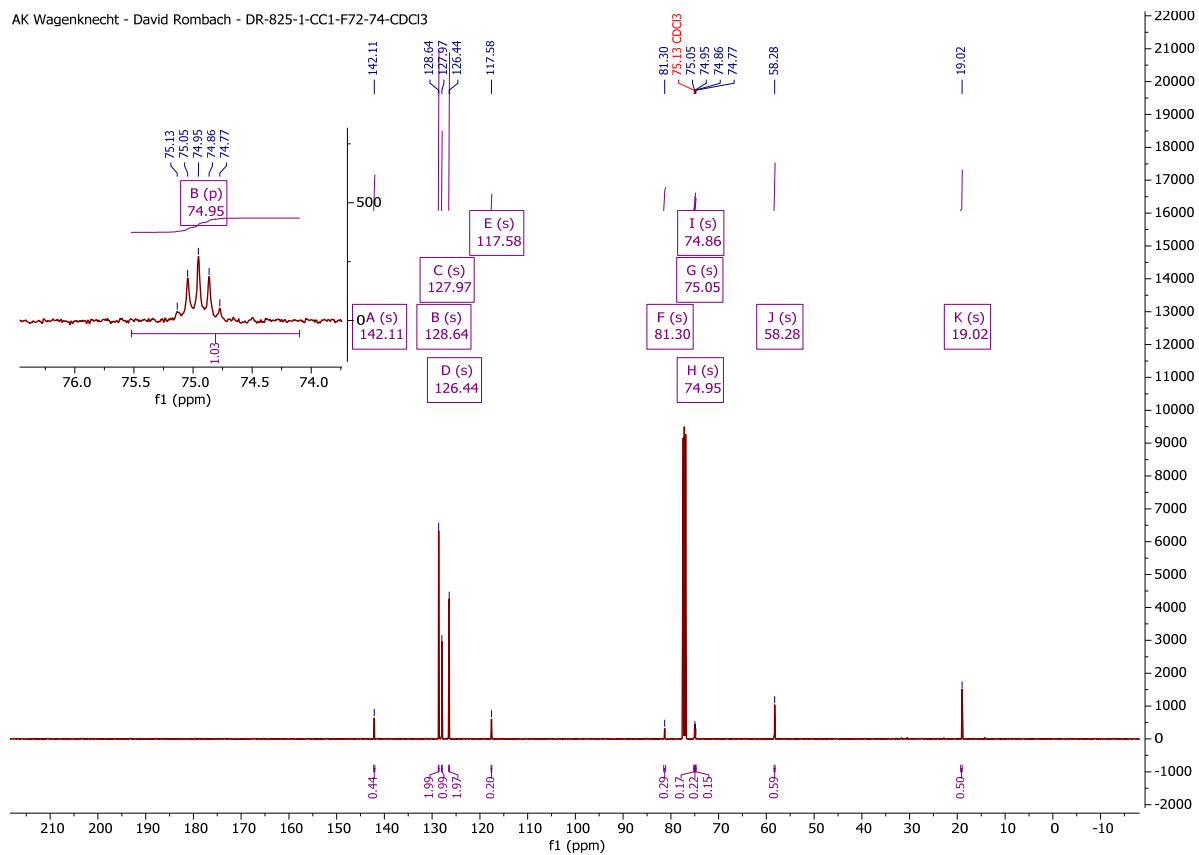

**Fig. S27**

<sup>13</sup>C-NMR spectrum of 3-(2-(pentafluoro- $\lambda^6$ -sulfanyl)-1,1-diphenylethoxy)propanenitrile (**14**) in CDCl<sub>3</sub>.

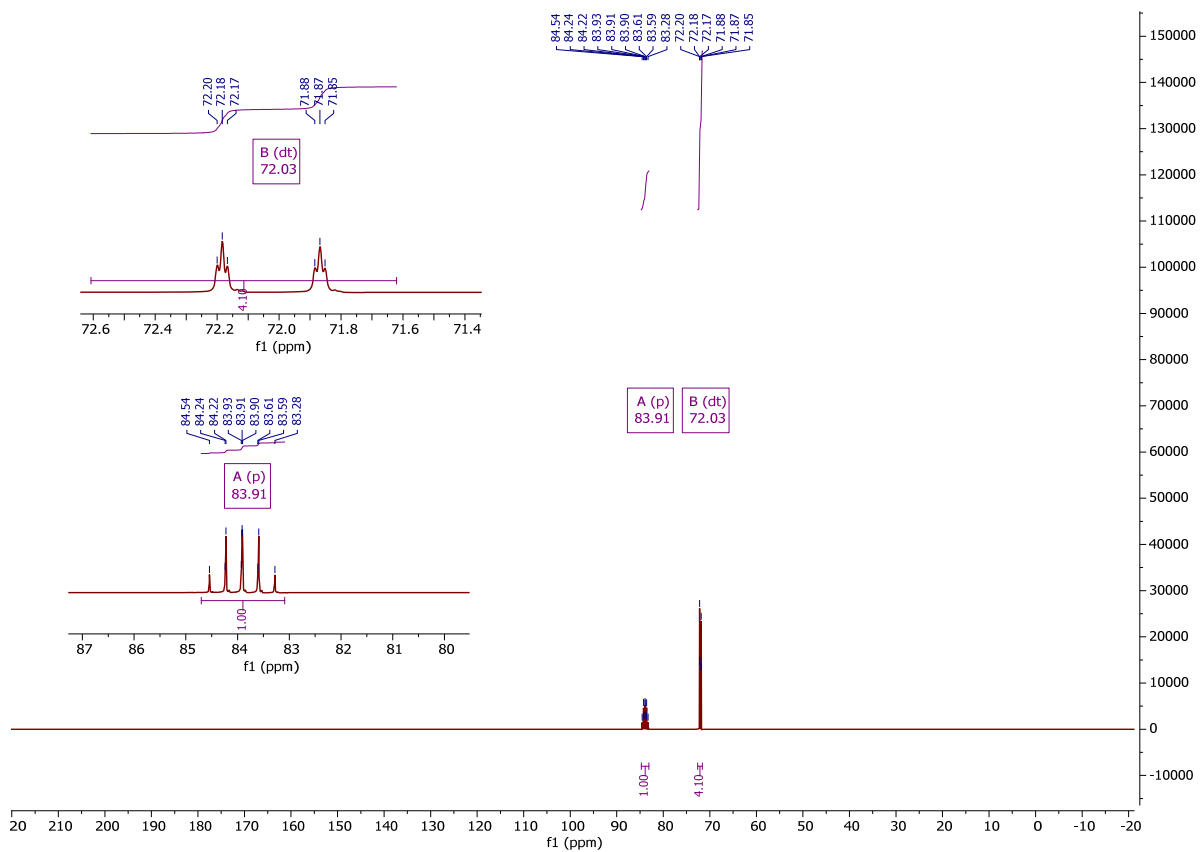

**Fig. S28**

$^{19}\text{F}$ -NMR spectrum of 3-(2-(pentafluoro- $\lambda^6$ -sulfaneyl)-1,1-diphenylethoxy)propanenitrile (**14**) in  $\text{CDCl}_3$ .

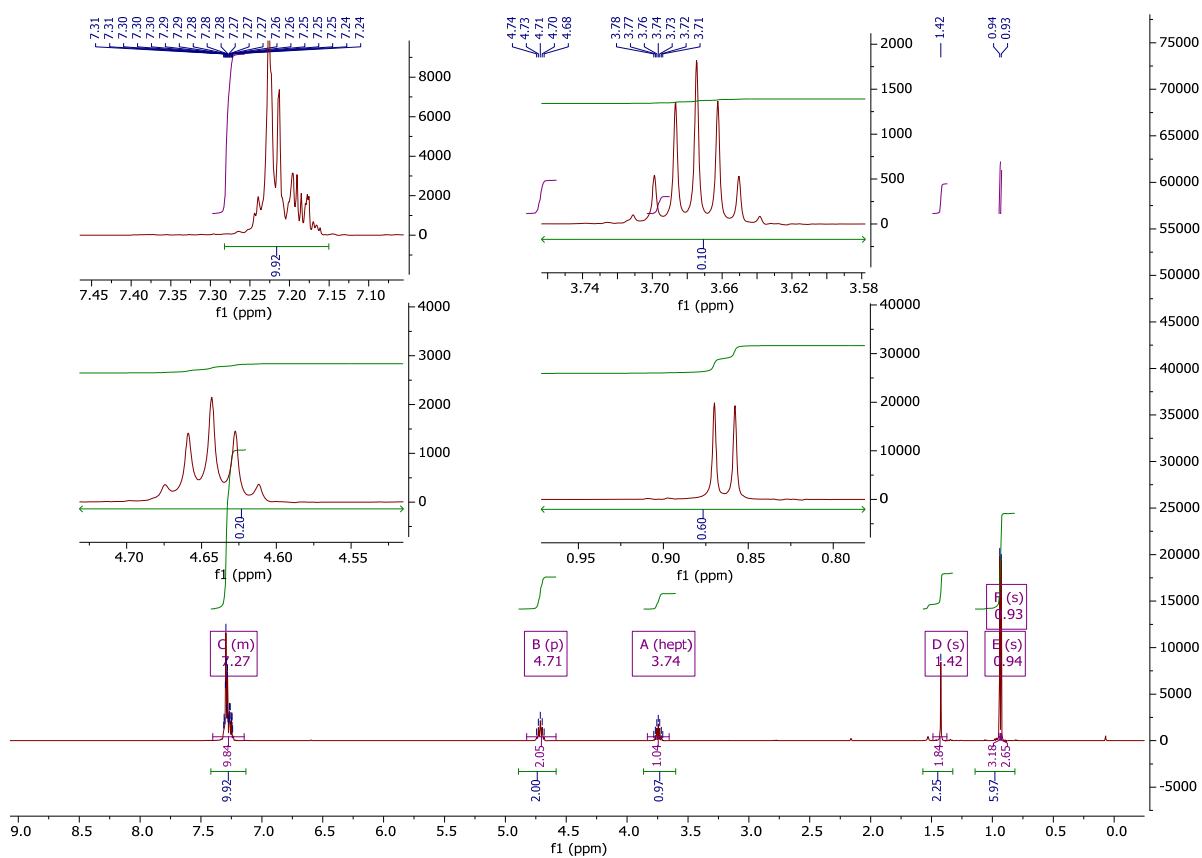

**Fig. S29**

$^1\text{H-NMR}$  spectrum of pentafluoro-(2-isopropoxy-2,2-diphenylethyl)- $\lambda^6$ -sulfane (**15**) in  $\text{CDCl}_3$ .

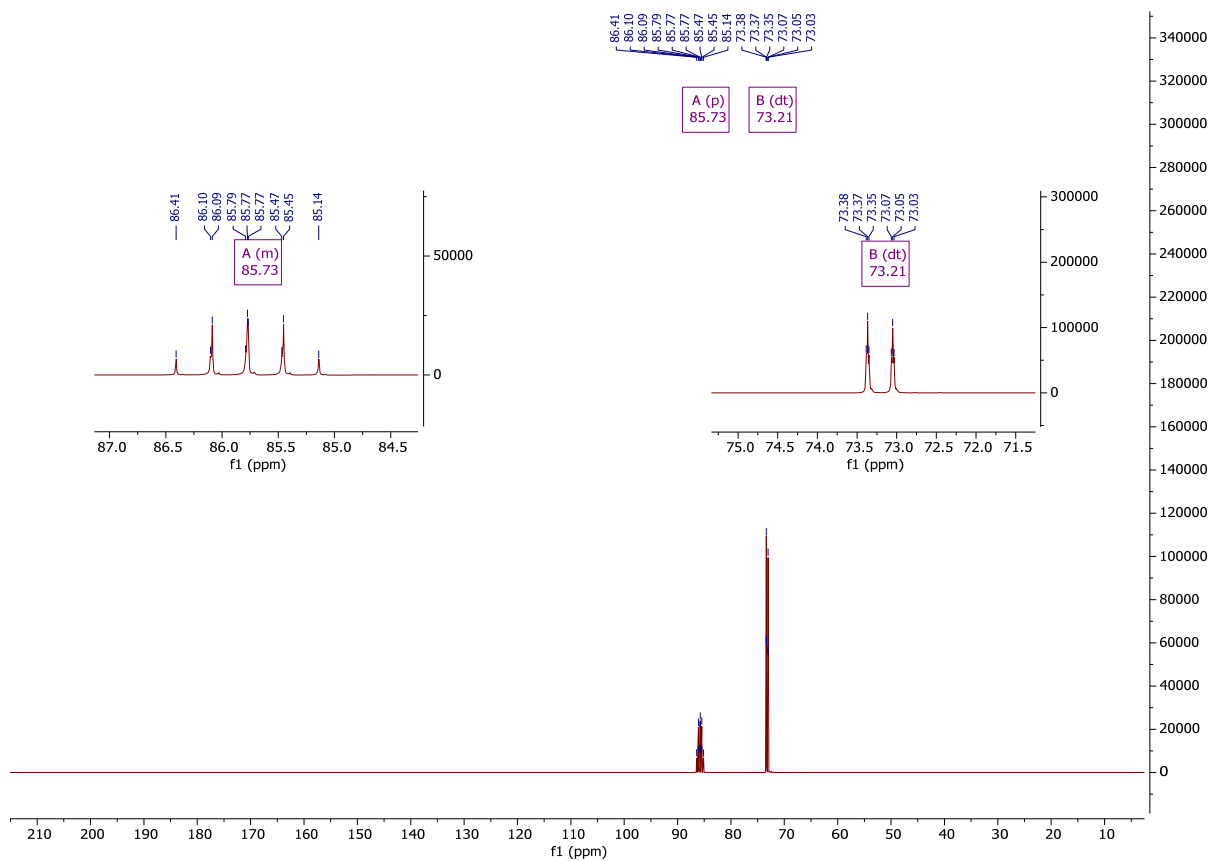

**Fig. S30**

<sup>19</sup>F-NMR spectrum of pentafluoro-(2-isopropoxy-2,2-diphenylethyl)-λ<sup>6</sup>-sulfane (**15**) in CDCl<sub>3</sub>.



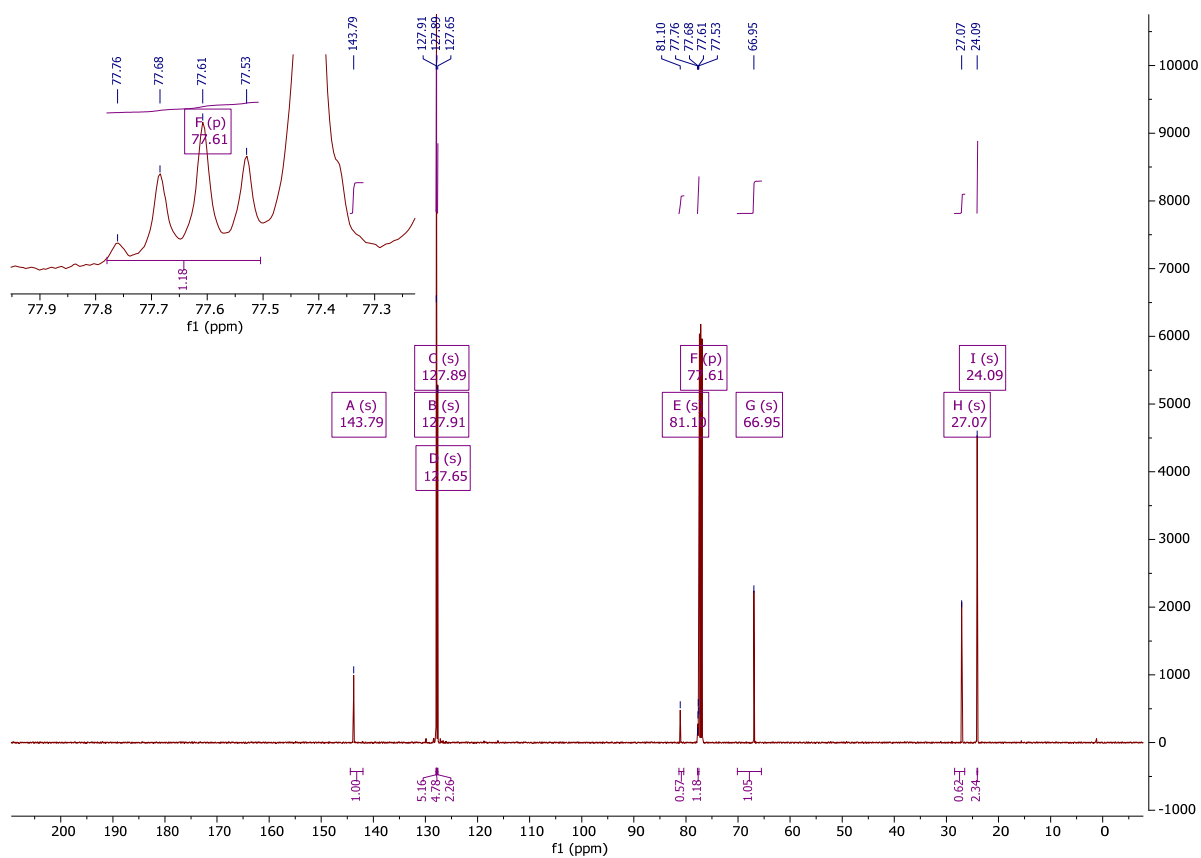

**Fig. S31**

$^{13}\text{C}$ -NMR spectrum of pentafluoro-(2-isopropoxy-2,2-diphenylethyl)- $\lambda^6$ -sulfane (**15**) in  $\text{CDCl}_3$ .

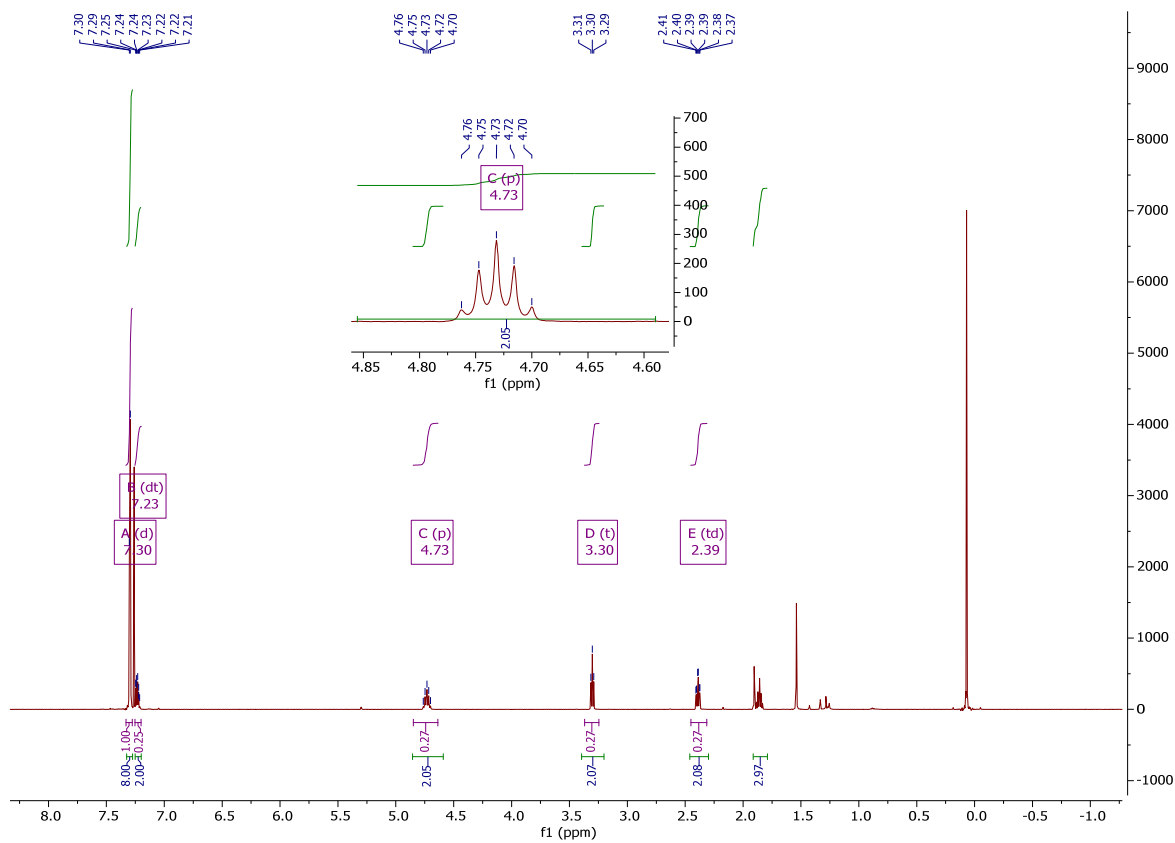

**Fig. S32**

$^1\text{H-NMR}$  spectrum of pentafluoro(2-(pent-4-yn-1-yloxy)-2,2-diphenylethyl)- $\lambda^6$ -sulfane (**16**) in  $\text{CDCl}_3$ .

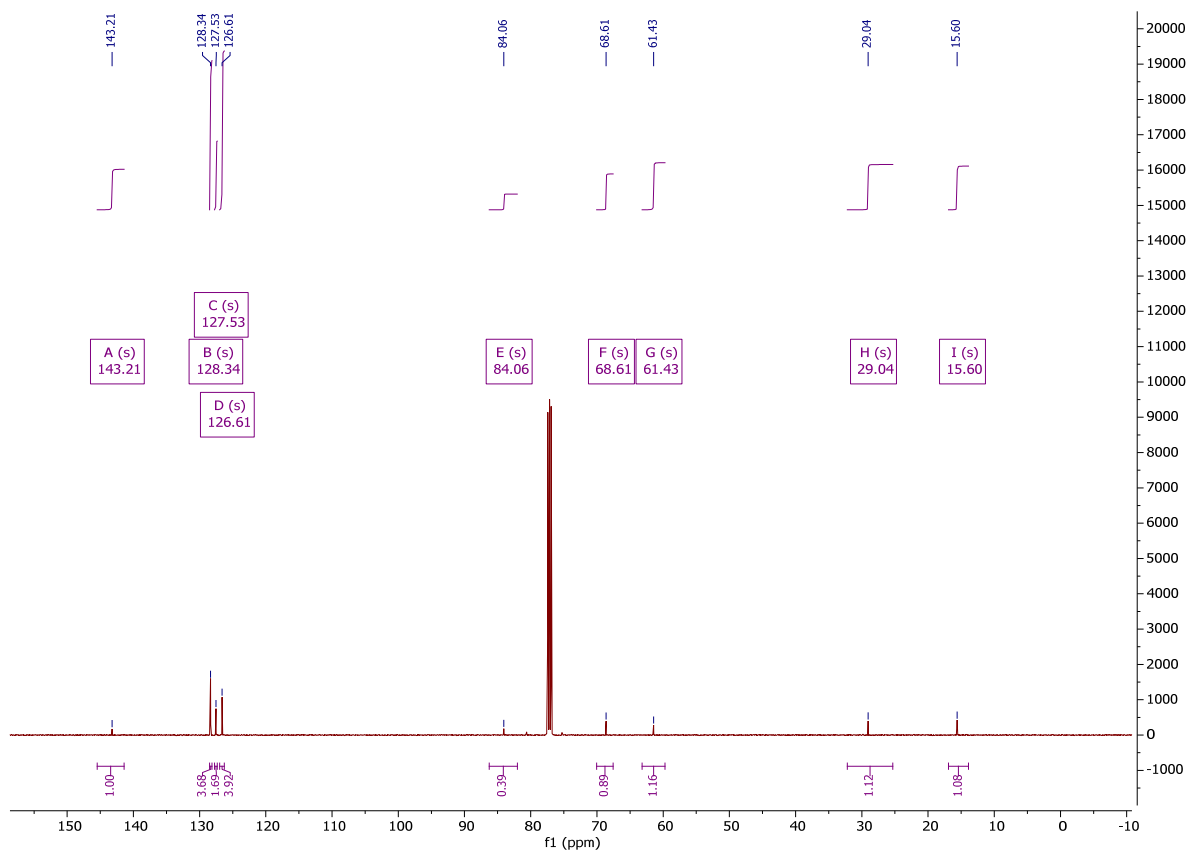

**Fig. S33**

$^{13}\text{C}$ -NMR spectrum of pentafluoro(2-(pent-4-yn-1-yloxy)-2,2-diphenylethyl)- $\lambda^6$ -sulfane (**16**) in  $\text{CDCl}_3$ .

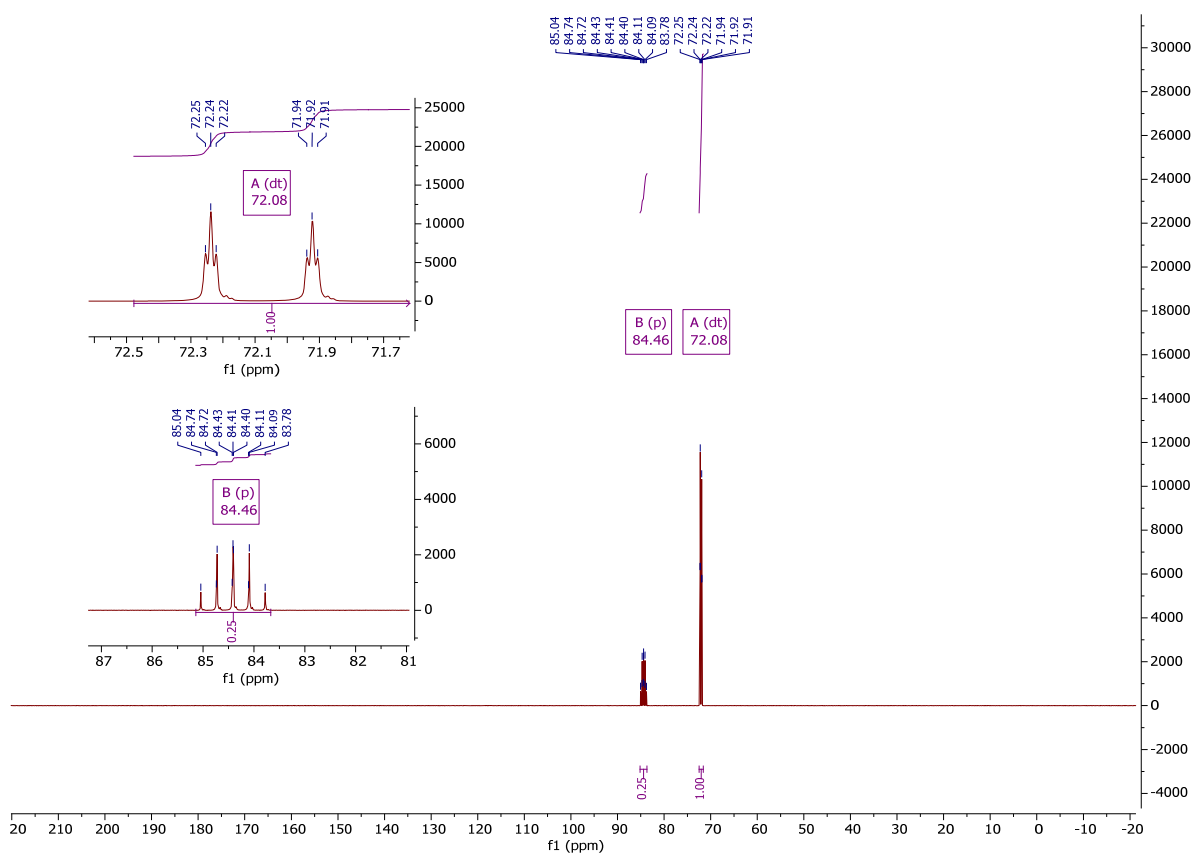

**Fig. S34**

$^{19}\text{F}$ -NMR spectrum of pentafluoro(2-(pent-4-yn-1-yloxy)-2,2-diphenylethyl)- $\lambda^6$ -sulfane (**16**) in  $\text{CDCl}_3$ .

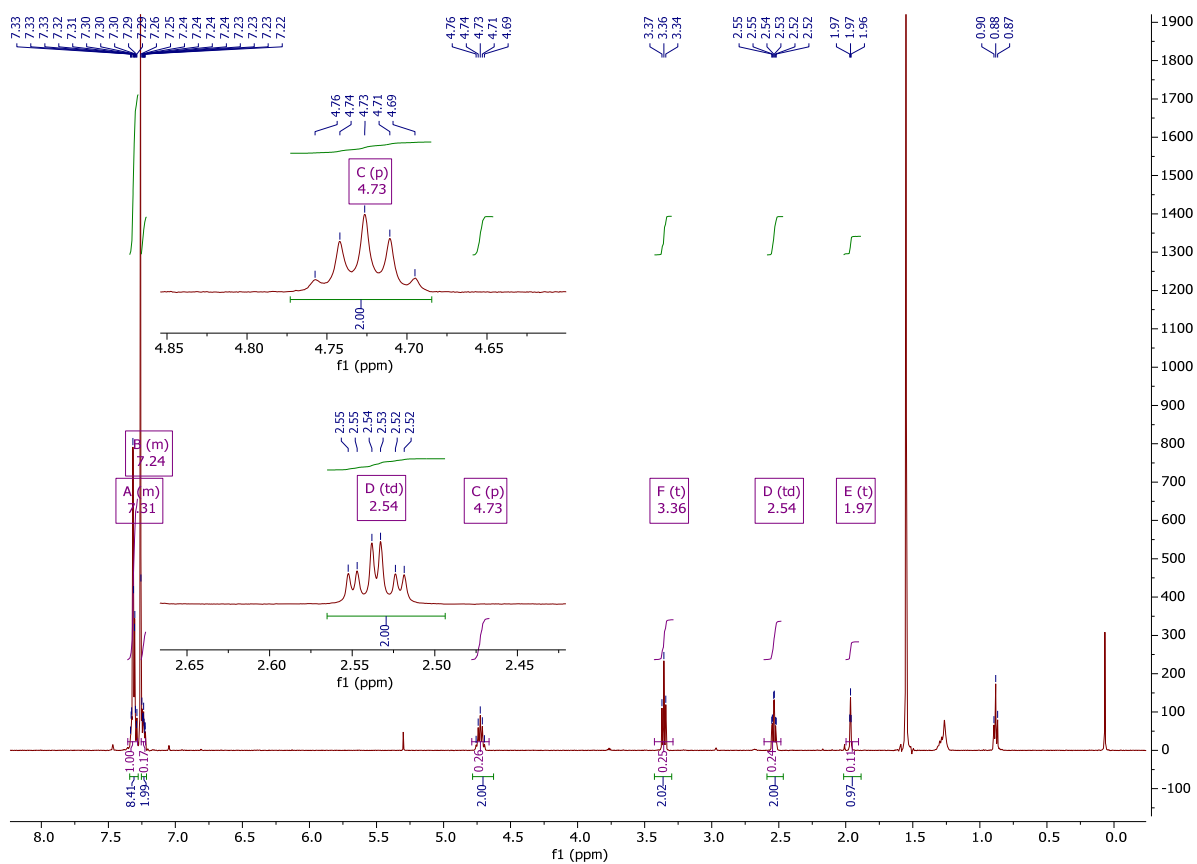

**Fig. S35**

<sup>1</sup>H-NMR spectrum of (2-(but-3-yn-1-yloxy)-2,2-diphenylethyl)pentafluoro- $\lambda^6$ -sulfane (**17**) in CDCl<sub>3</sub>.

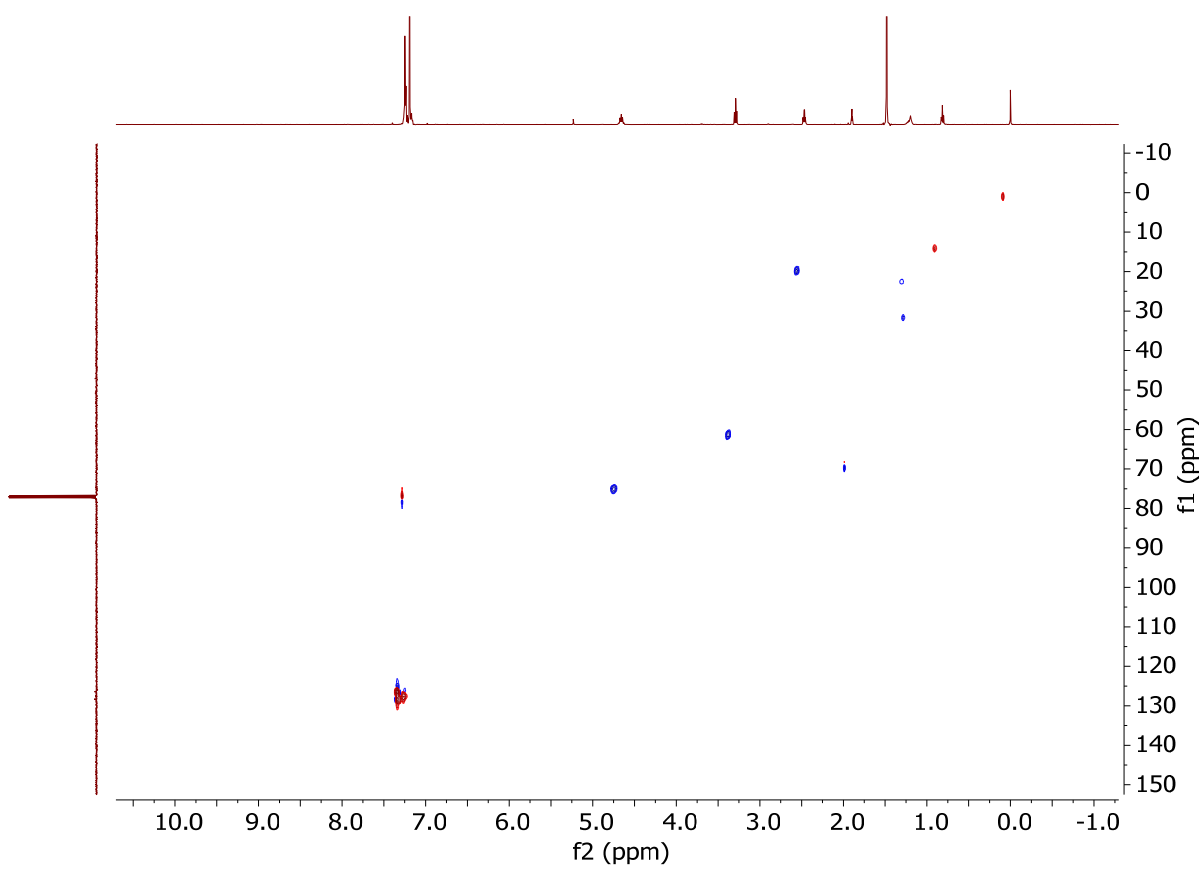

**Fig. S36**

$^1\text{H}$ - $^{13}\text{C}$ -HSQC<sub>ed</sub>-NMR spectrum of (2-(but-3-yn-1-yloxy)-2,2-diphenylethyl)pentafluoro- $\lambda^6$ -sulfane (**17**) in  $\text{CDCl}_3$ .

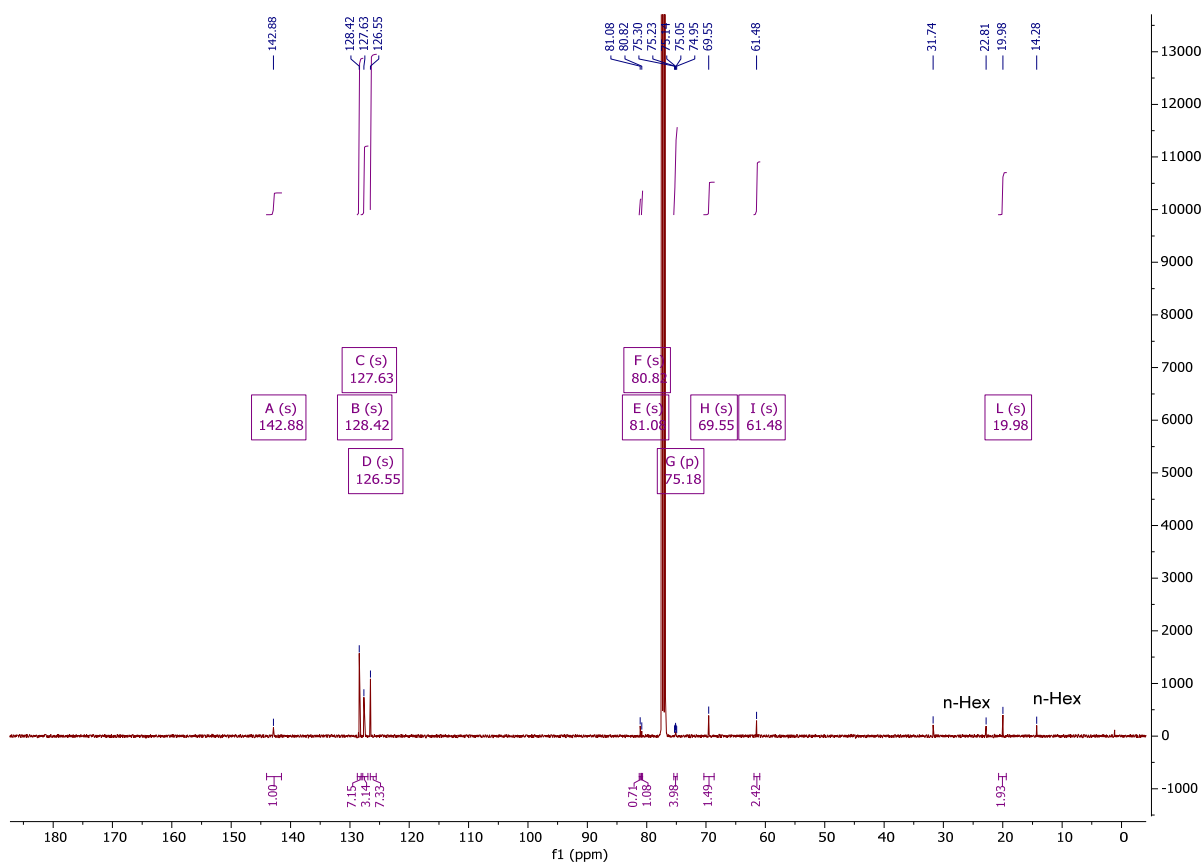

**Fig. S37**

$^{13}\text{C}$ -NMR spectrum of (2-(but-3-yn-1-yloxy)-2-diphenylethyl)pentafluoro- $\lambda^6$ -sulfane (**17**) in  $\text{CDCl}_3$ .

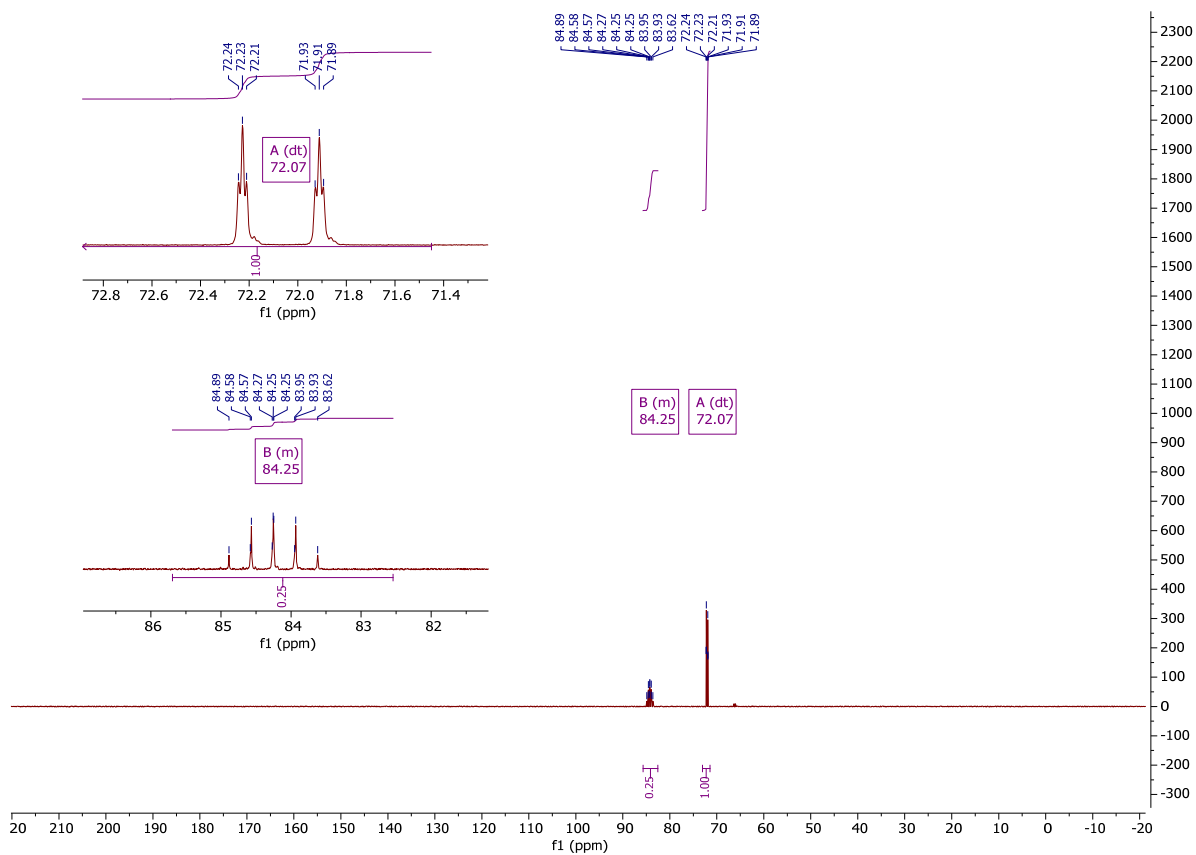

**Fig. S38**

$^{19}\text{F}$ -NMR spectrum of (2-(but-3-yn-1-yloxy)-2,2-diphenylethyl)pentafluoro- $\lambda^6$ -sulfane (**17**) in  $\text{CDCl}_3$ .



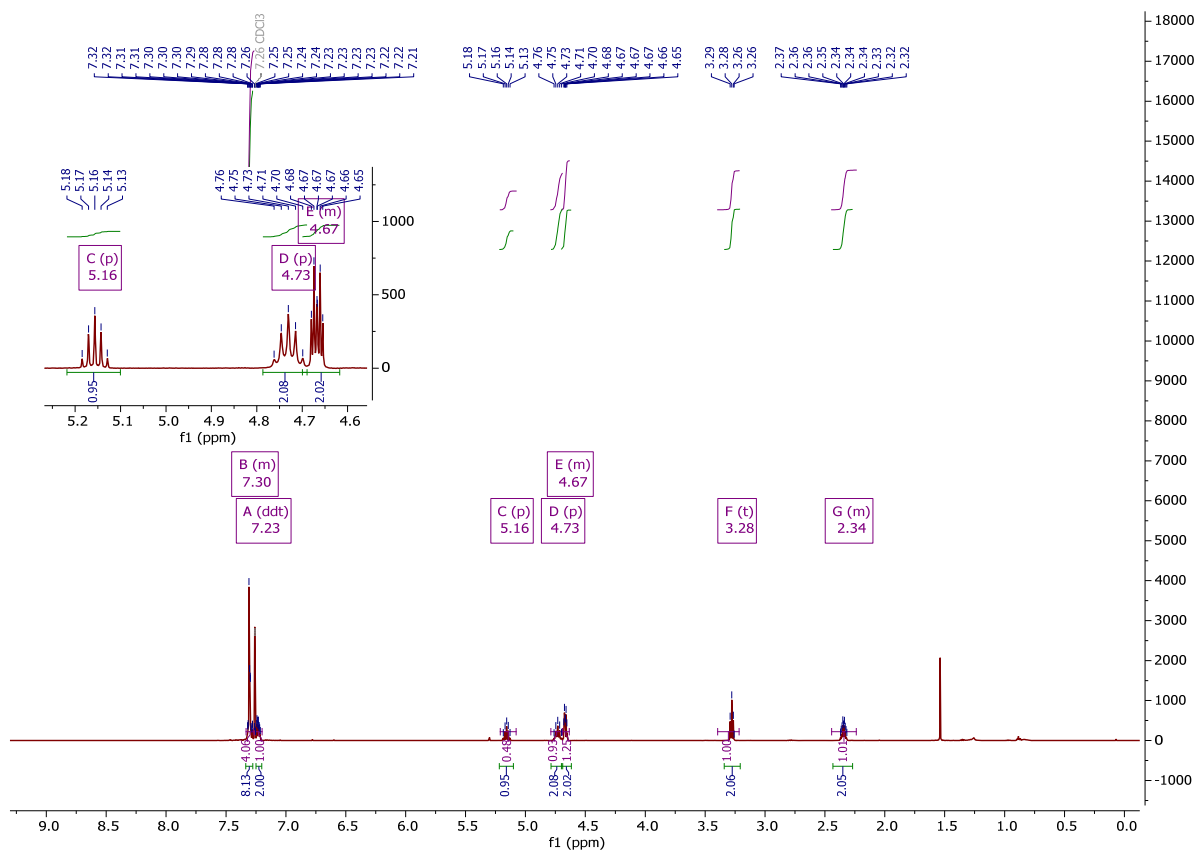

**Fig. S39**

<sup>1</sup>H-NMR spectrum of pentafluoro(2-(penta-3,4-dien-1-yloxy)-2,2-diphenylethyl)-C<sub>6</sub>-sulfane (**18**) in CDCl<sub>3</sub>.

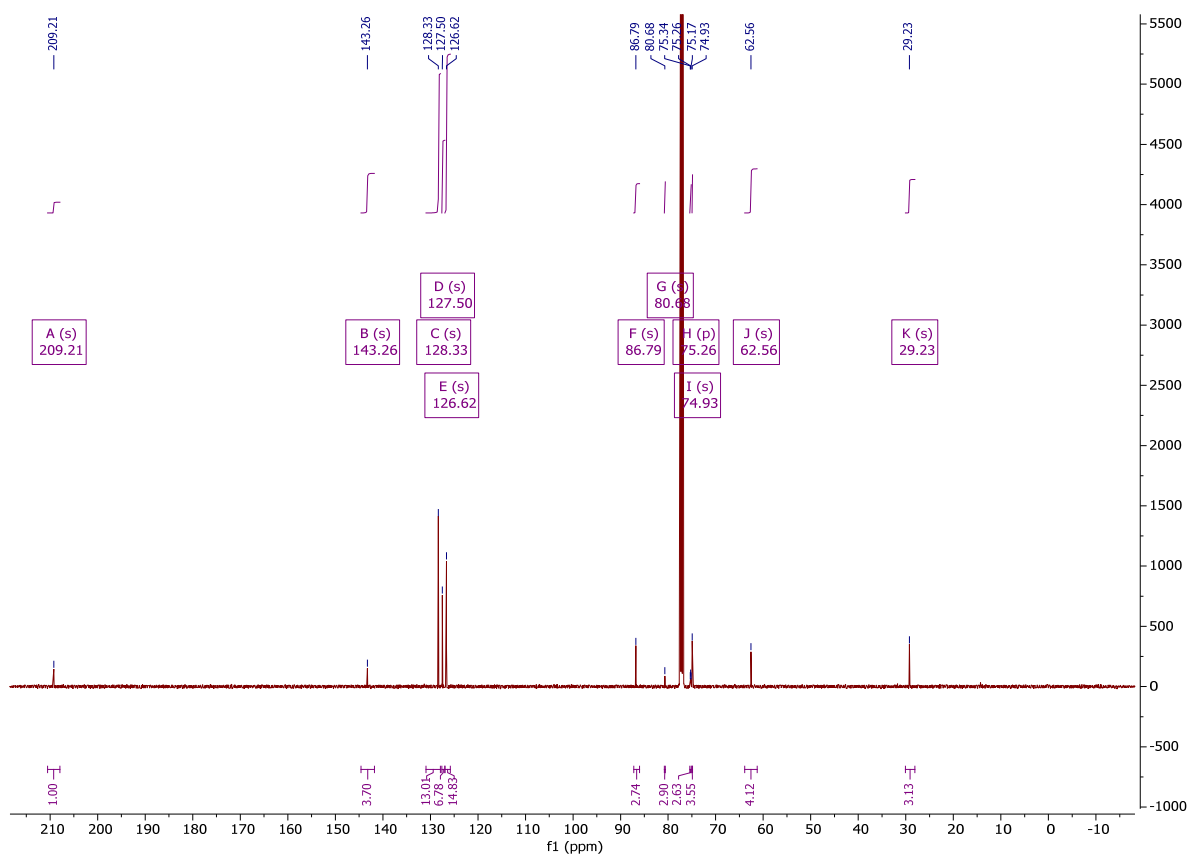

**Fig. S40**

<sup>13</sup>C-NMR spectrum of pentafluoro(2-(penta-3,4-dien-1-yloxy)-2,2-diphenylethyl)-λ<sup>6</sup>-sulfane (**18**) in CDCl<sub>3</sub>.

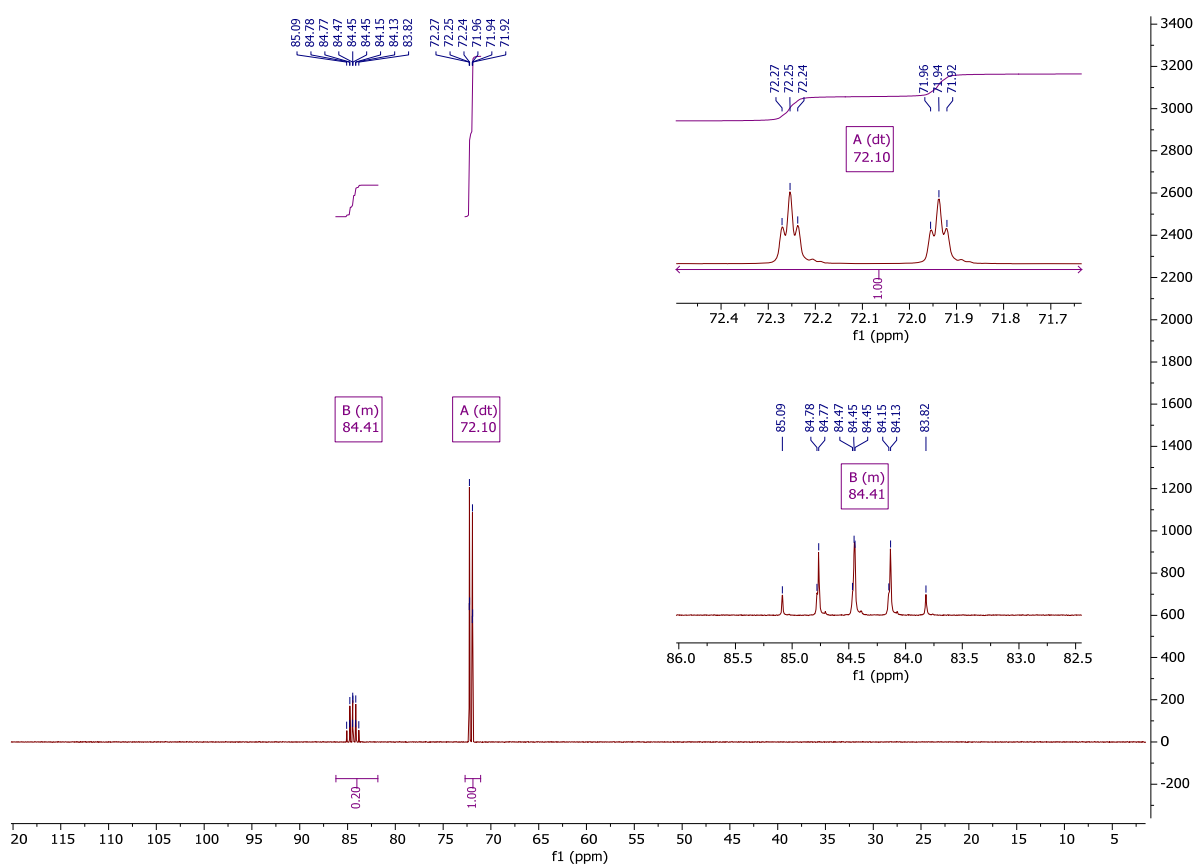

**Fig. S41**

$^{19}\text{F}$ -NMR spectrum of pentafluoro(2-(penta-3,4-dien-1-yloxy)-2,2-diphenylethyl)- $\lambda^6$ -sulfane (**18**) in  $\text{CDCl}_3$ .

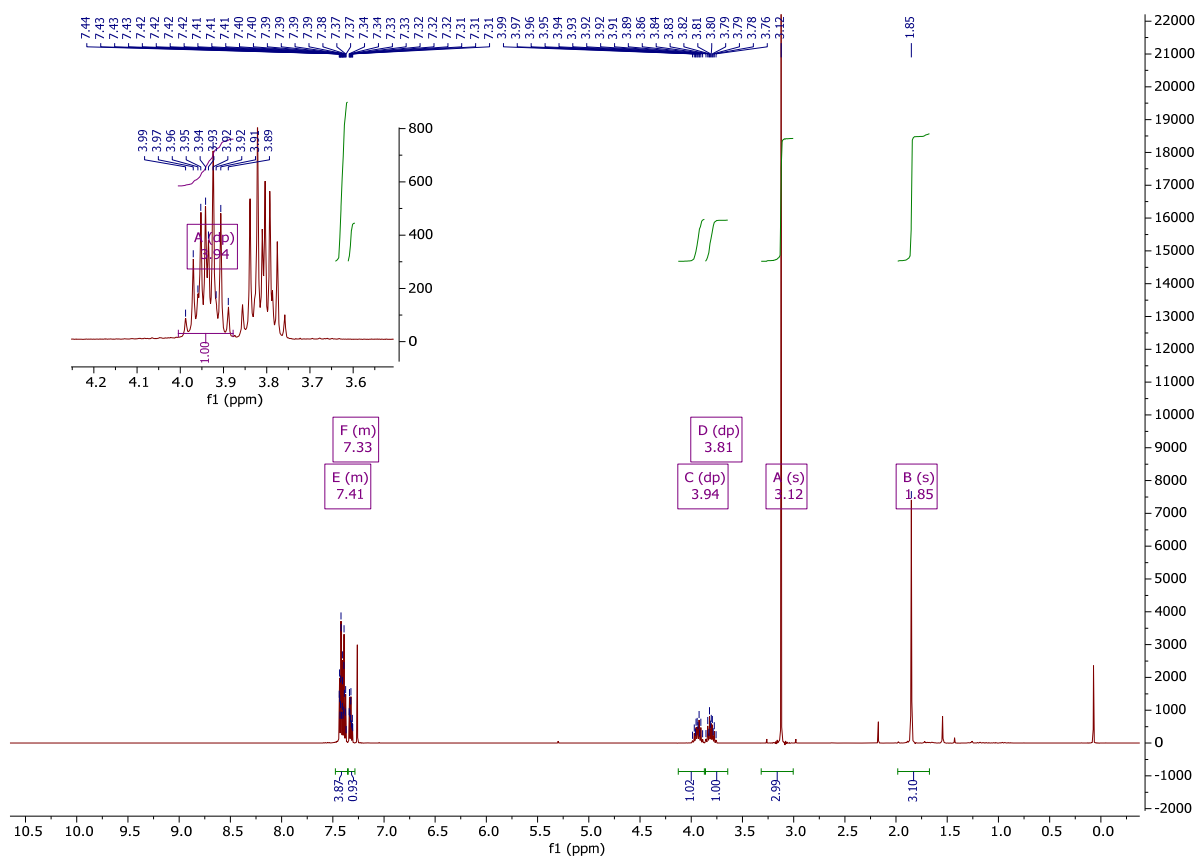

**Fig. S42**

$^1\text{H-NMR}$  spectrum of pentafluoro(2-methoxy-2-phenylpropyl)- $\lambda^6$ -sulfane (**8**) in  $\text{CDCl}_3$ .

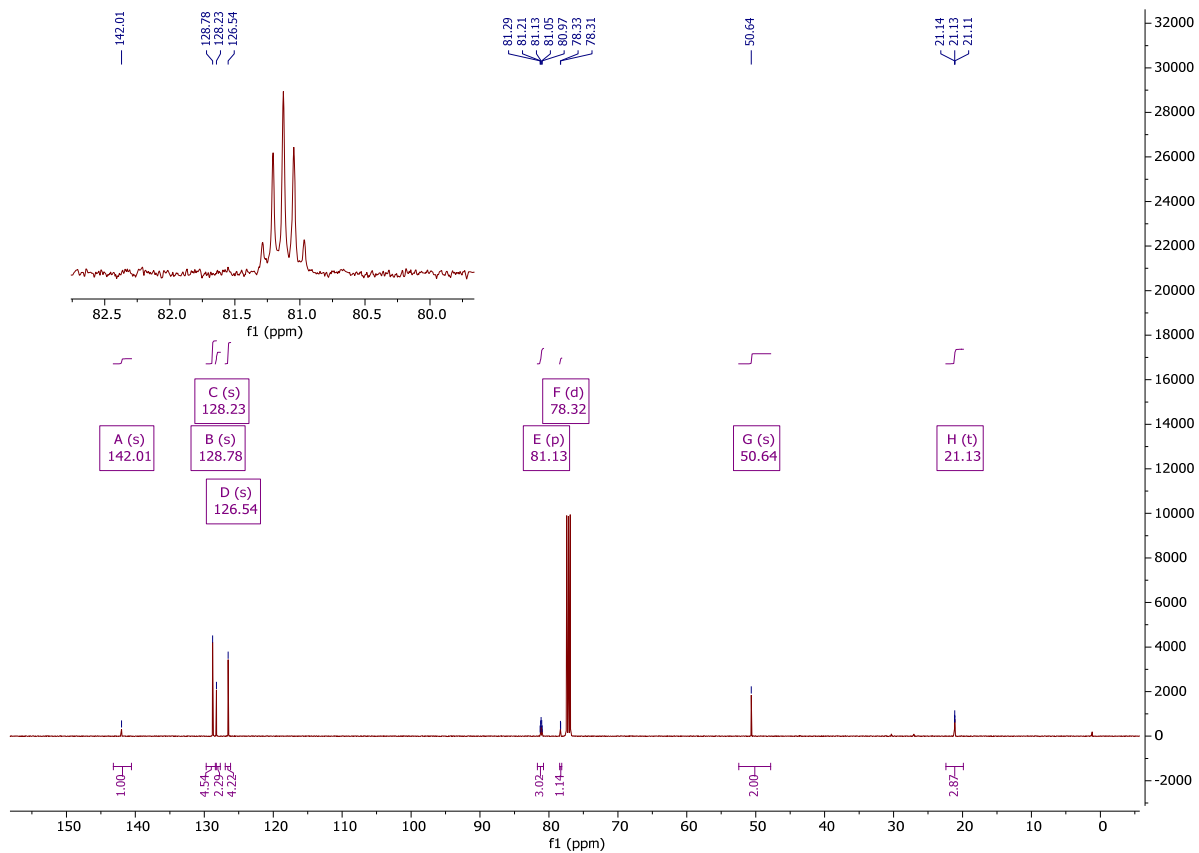

**Fig. S43**

$^{13}\text{C}$ -NMR spectrum of pentafluoro(2-methoxy-2-phenylpropyl)- $\lambda^6$ -sulfane (**8**) in  $\text{CDCl}_3$ .

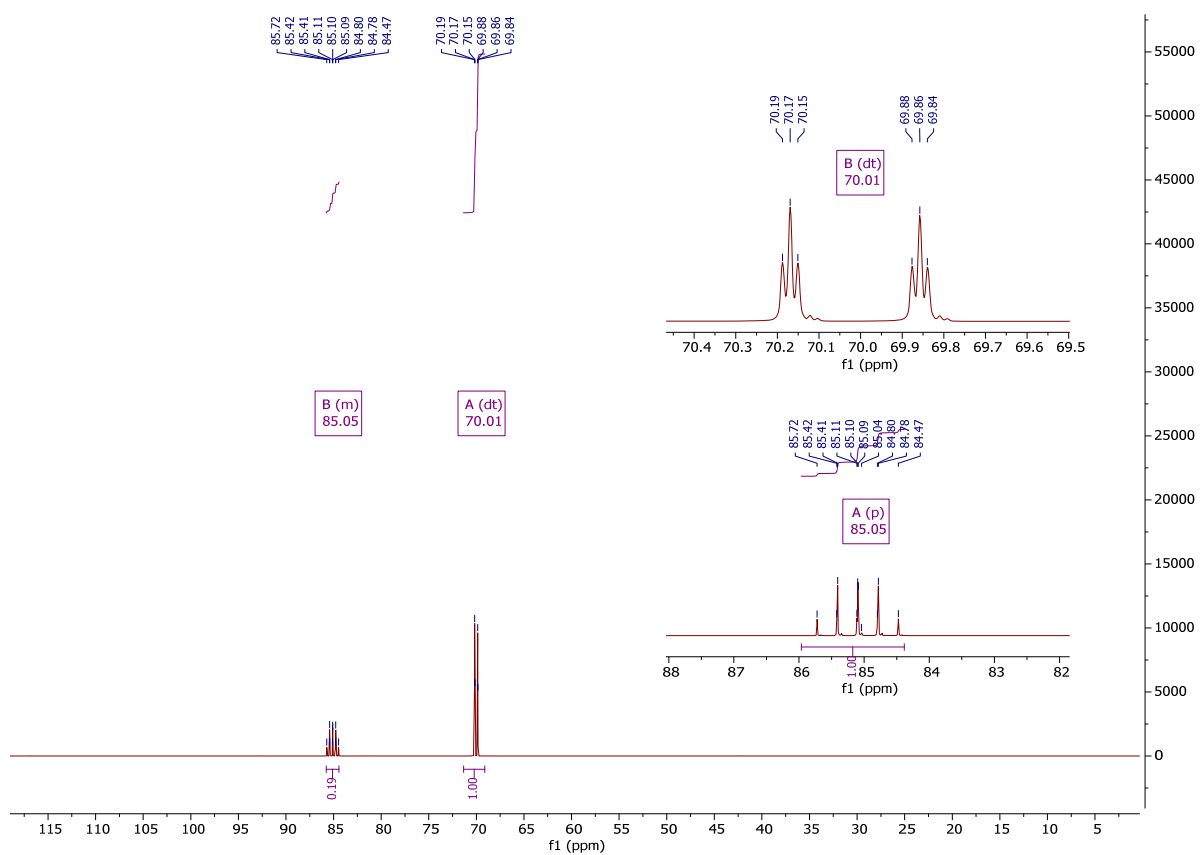

**Fig. S44**

$^{19}\text{F}$ -NMR spectrum of pentafluoro(2-methoxy-2-phenylpropyl)- $\lambda^6$ -sulfane (**8**) in  $\text{CDCl}_3$ .

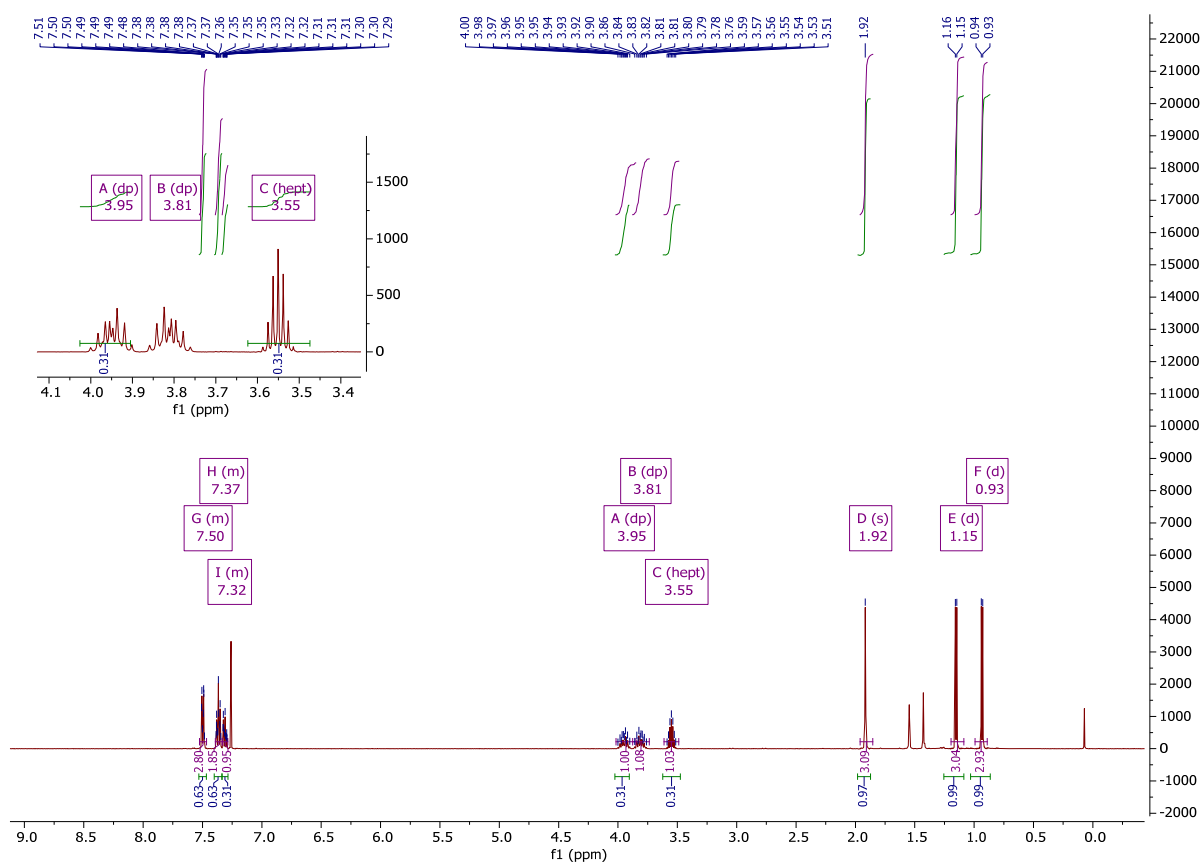

**Fig. S45**

<sup>1</sup>H - NMR spectrum of pentafluoro(2-isopropoxy-2-phenylpropyl)-λ<sup>6</sup>-sulfane (**19**) in CDCl<sub>3</sub>.

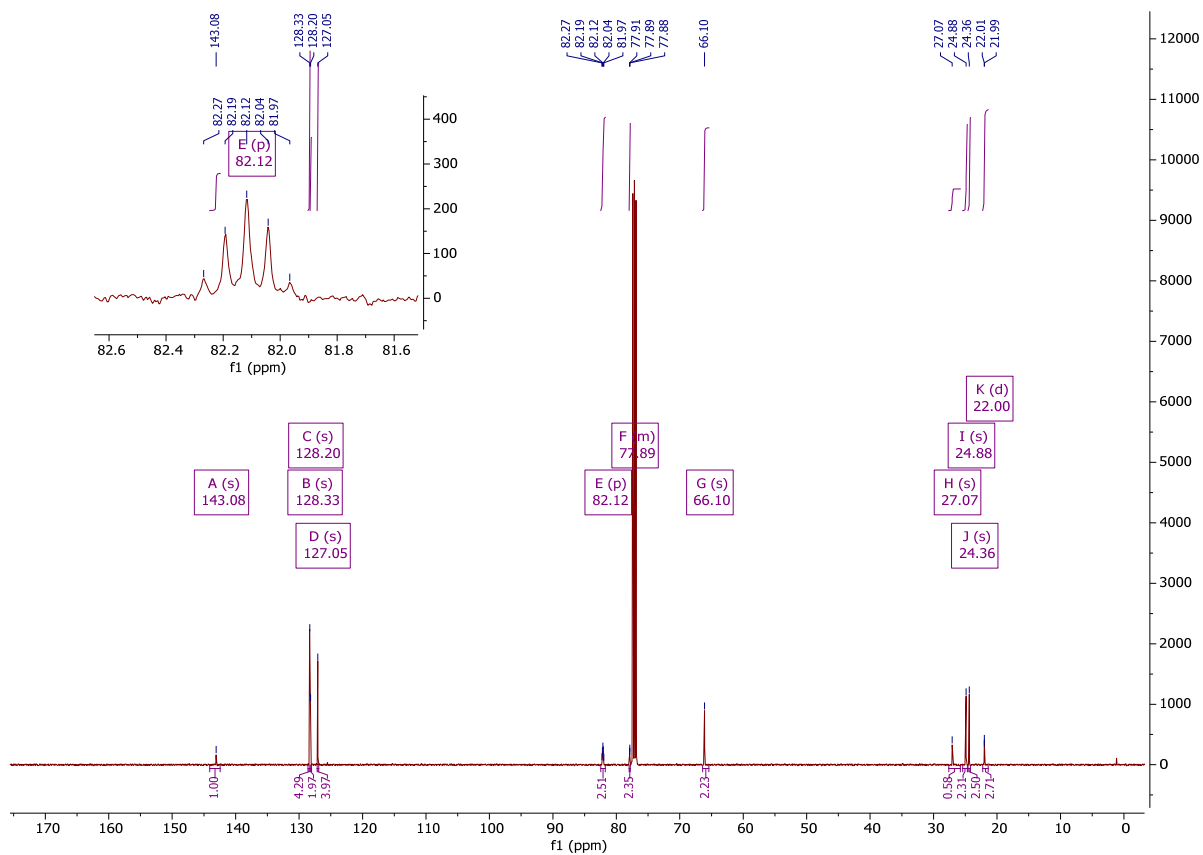

**Fig. S46**

<sup>13</sup>C-NMR spectrum of pentafluoro(2-isopropoxy-2-phenylpropyl)-λ<sup>6</sup>-sulfane (**19**) in CDCl<sub>3</sub>.



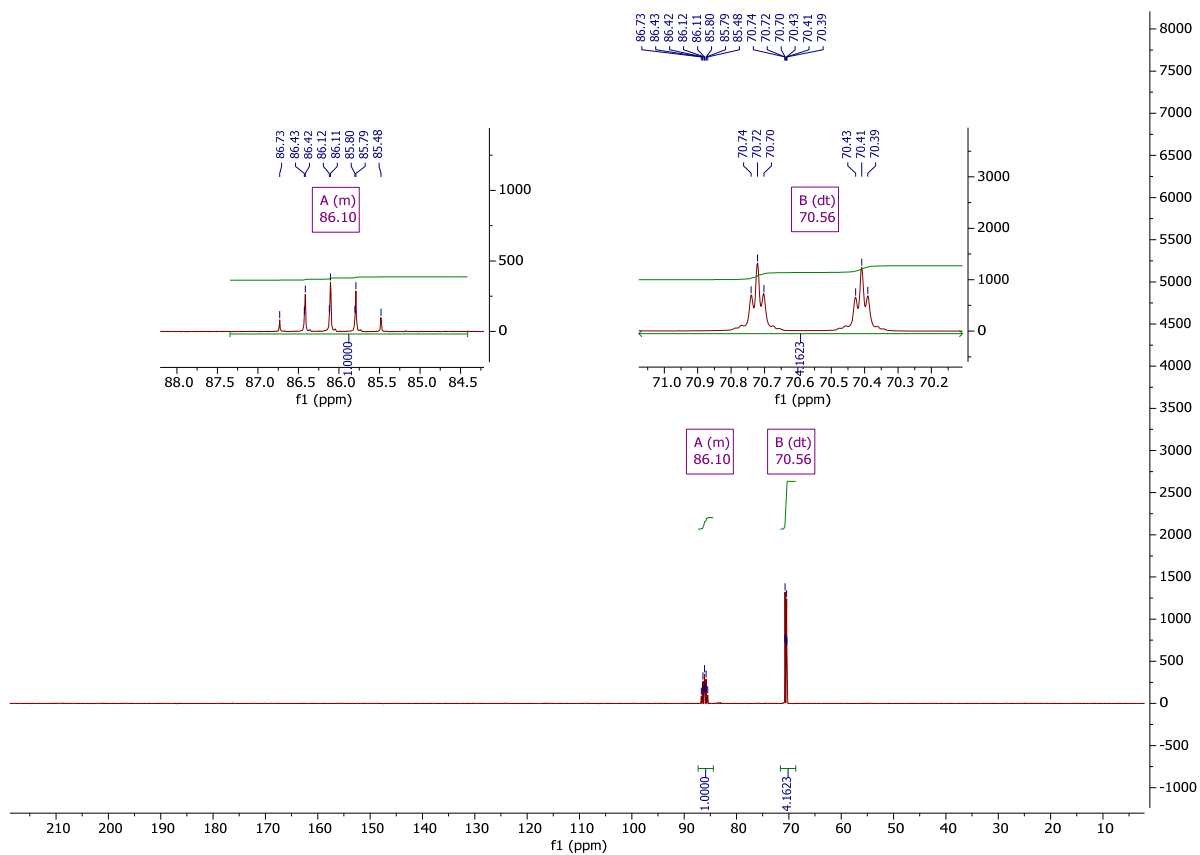

**Fig. S47**

$^{19}\text{F}$ -NMR spectrum of pentafluoro(2-isopropoxy-2-phenylpropyl)- $\lambda^6$ -sulfane (**19**) in  $\text{CDCl}_3$ .

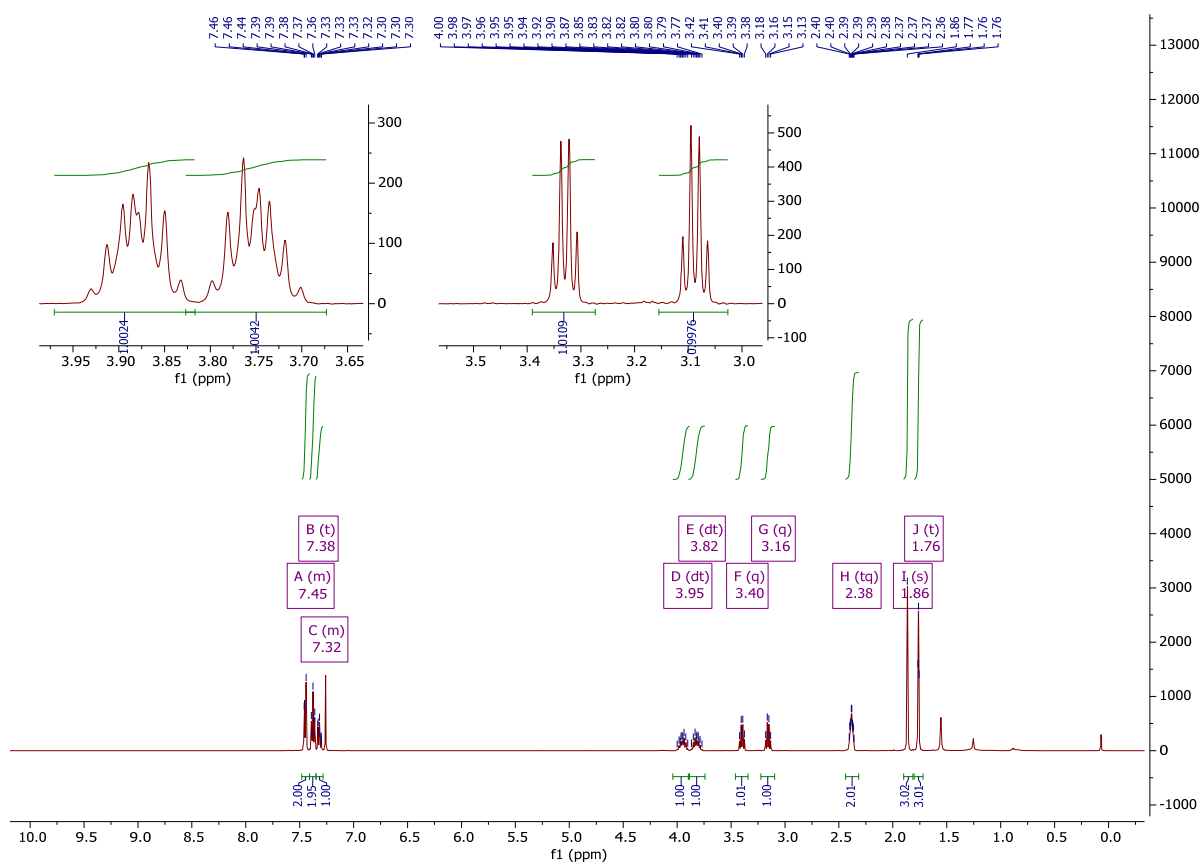

**Fig. S48**

<sup>1</sup>H-NMR spectrum of pentafluoro(2-(pent-3-yn-1-yloxy)-2-phenylpropyl)-λ<sup>6</sup>-sulfane (**20**) in CDCl<sub>3</sub>.

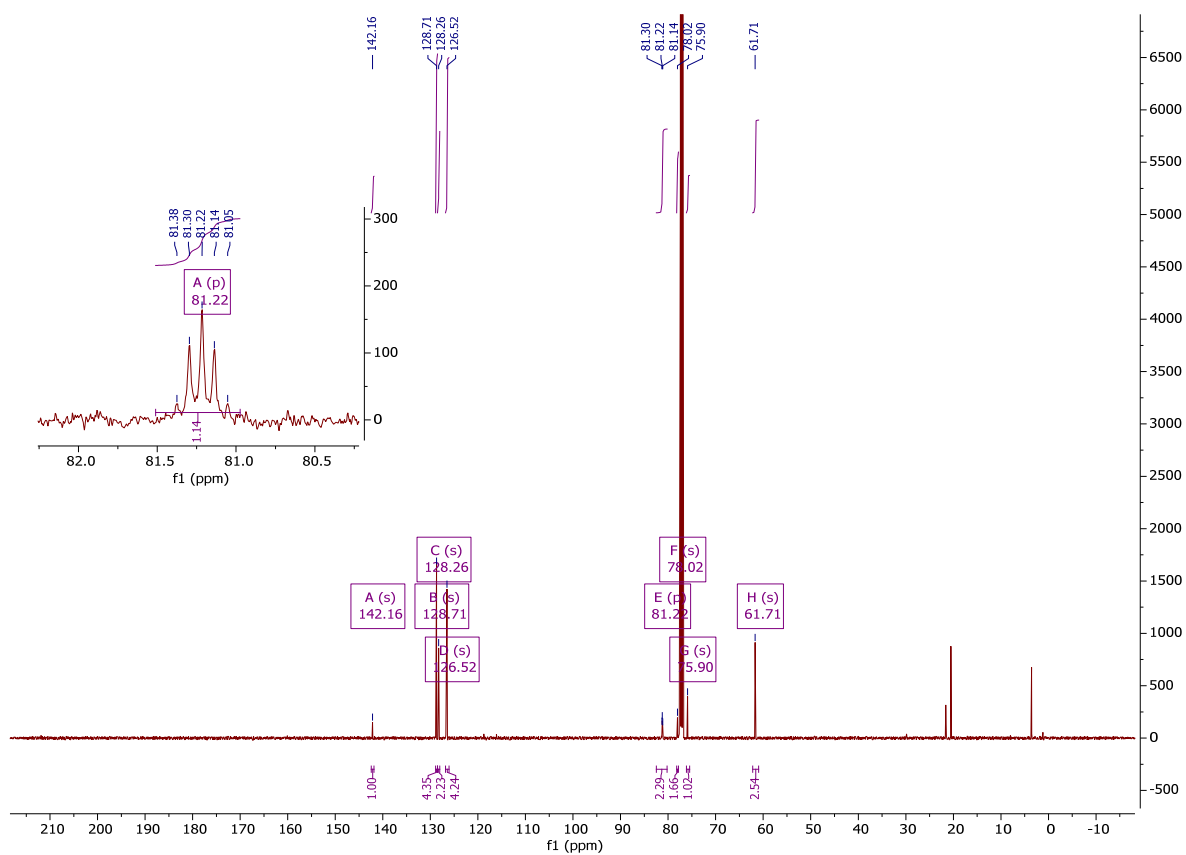

**Fig. S49**

$^{13}\text{C}$ -NMR spectrum of pentafluoro(2-(pent-3-yn-1-yloxy)-2-phenylpropyl)- $\lambda^6$ -sulfane (**20**) in  $\text{CDCl}_3$ .

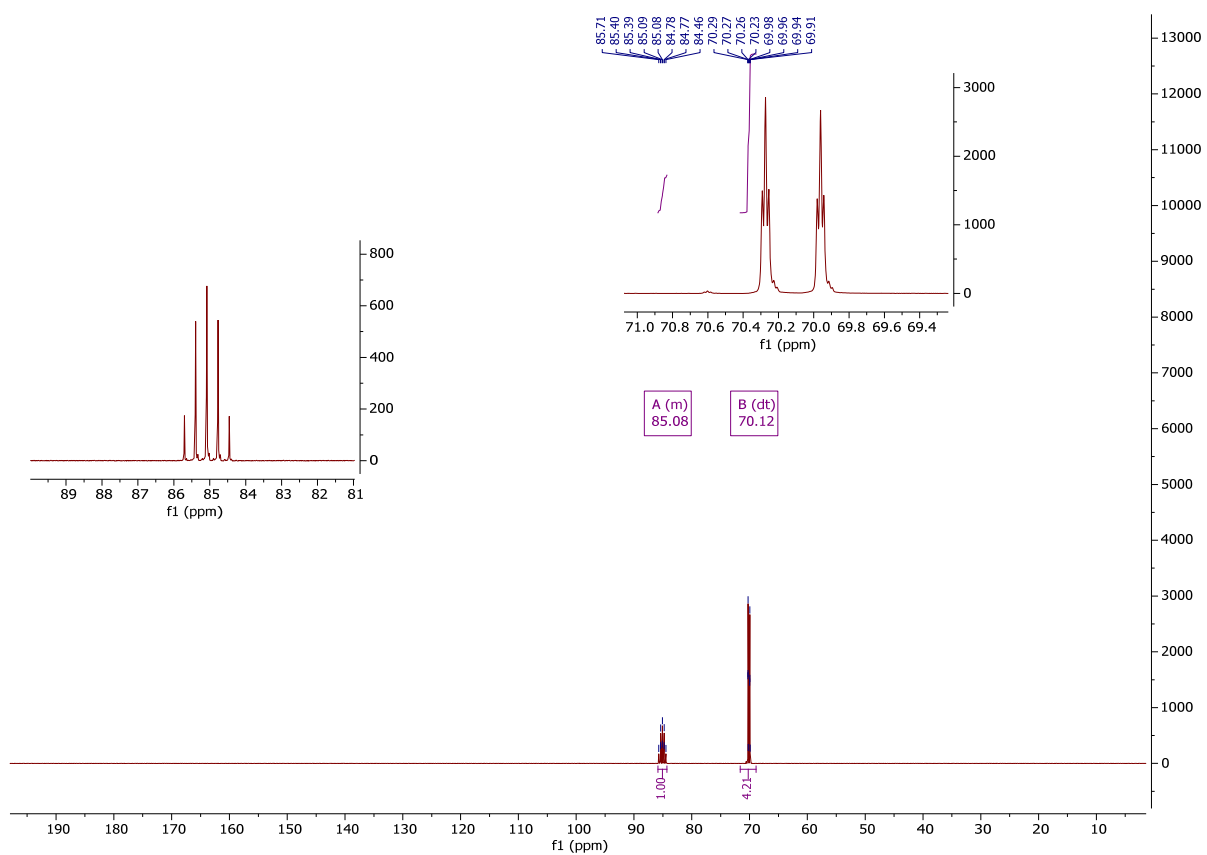

**Fig. S50**

$^{19}\text{F}$ -NMR spectrum of pentafluoro(2-(pent-3-yn-1-yloxy)-2-phenylpropyl)- $\lambda^6$ -sulfane (**20**) in  $\text{CDCl}_3$ .

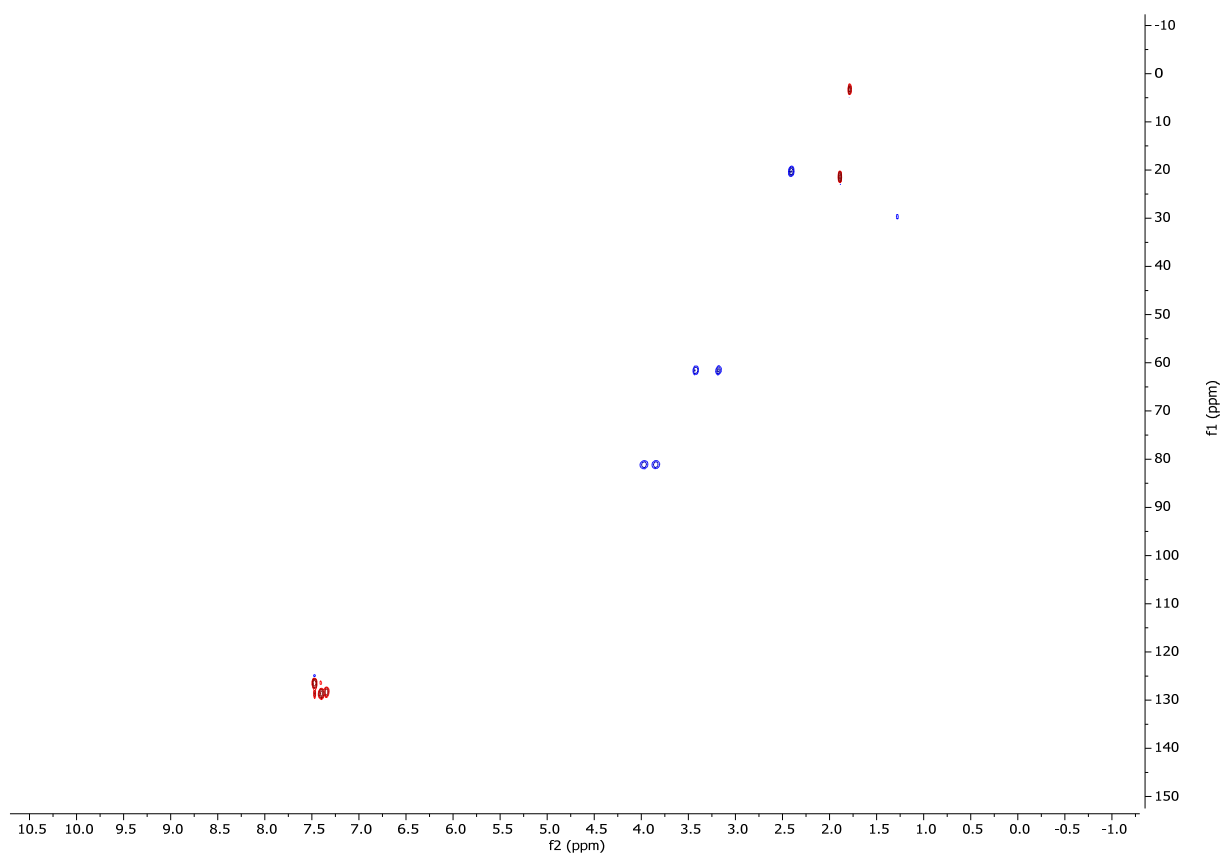

**Fig. S51**

$^1\text{H}$ - $^{13}\text{C}$ -HSQC<sub>ed</sub>-NMR spectrum of pentaffluoro(2-(pent-3-yn-1-yloxy)-2-phenylpropyl)- $\lambda^6$ -sulfane (**20**) in  $\text{CDCl}_3$ .

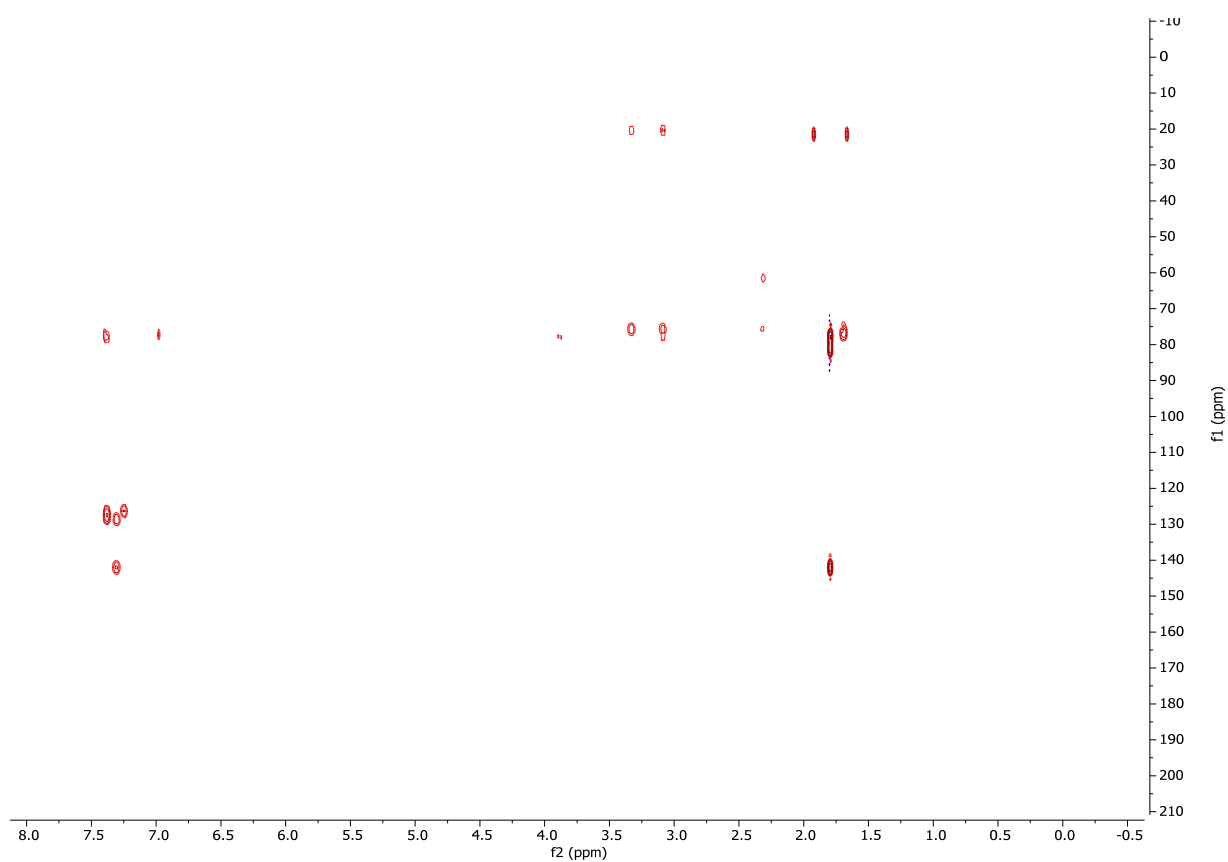

**Fig. S52**

$^1\text{H}$ - $^{13}\text{C}$ -HMBC-NMR spectrum of pentafluoro(2-(pent-3-yn-1-yloxy)-2-phenylpropyl)- $\lambda^6$ -sulfane (**20**) in  $\text{CDCl}_3$ .

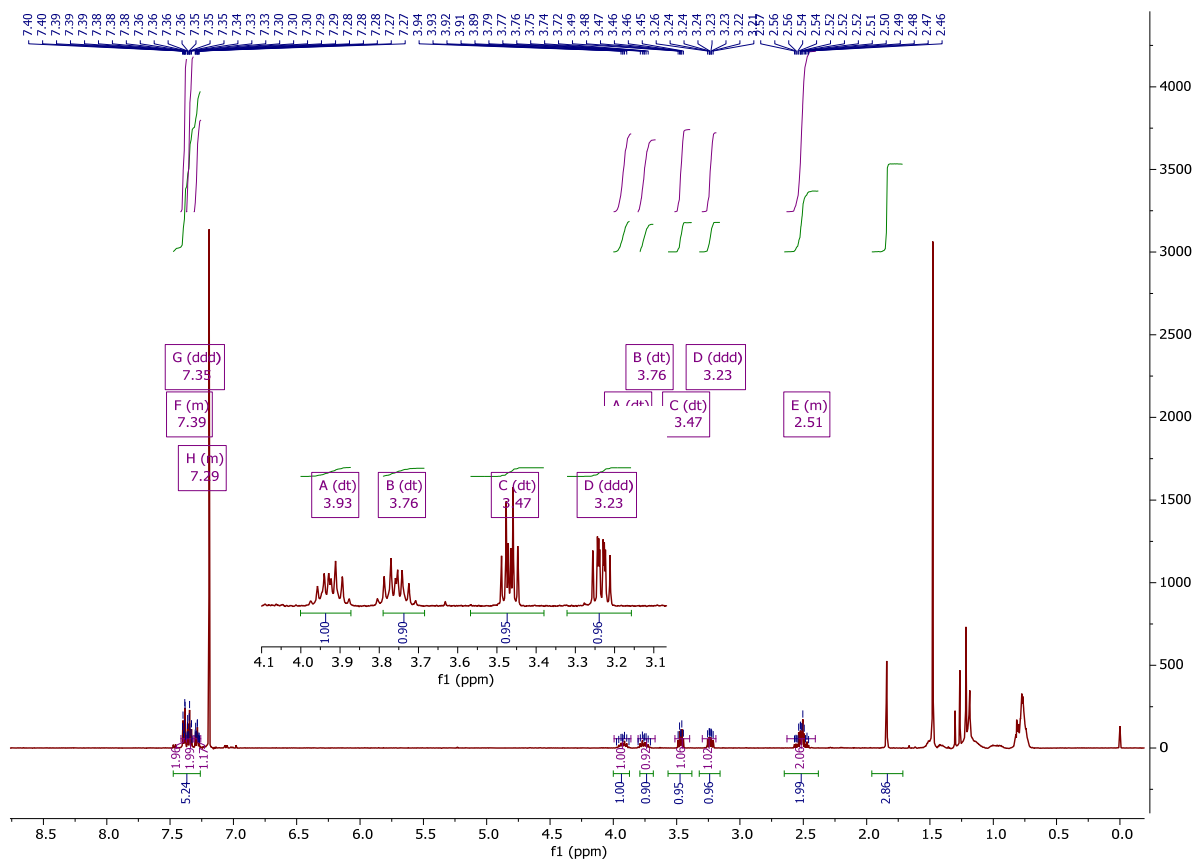

**Fig. S53**

$^1\text{H}$  - NMR spectrum of 3-((1-(pentafluoro- $\lambda^6$ -sulfaneyl)-2-phenylpropan-2-yl)oxy)propanenitrile (**21**) in  $\text{CDCl}_3$ . Residual alkyl impurities in high field between 0.5 and 1.4 ppm.

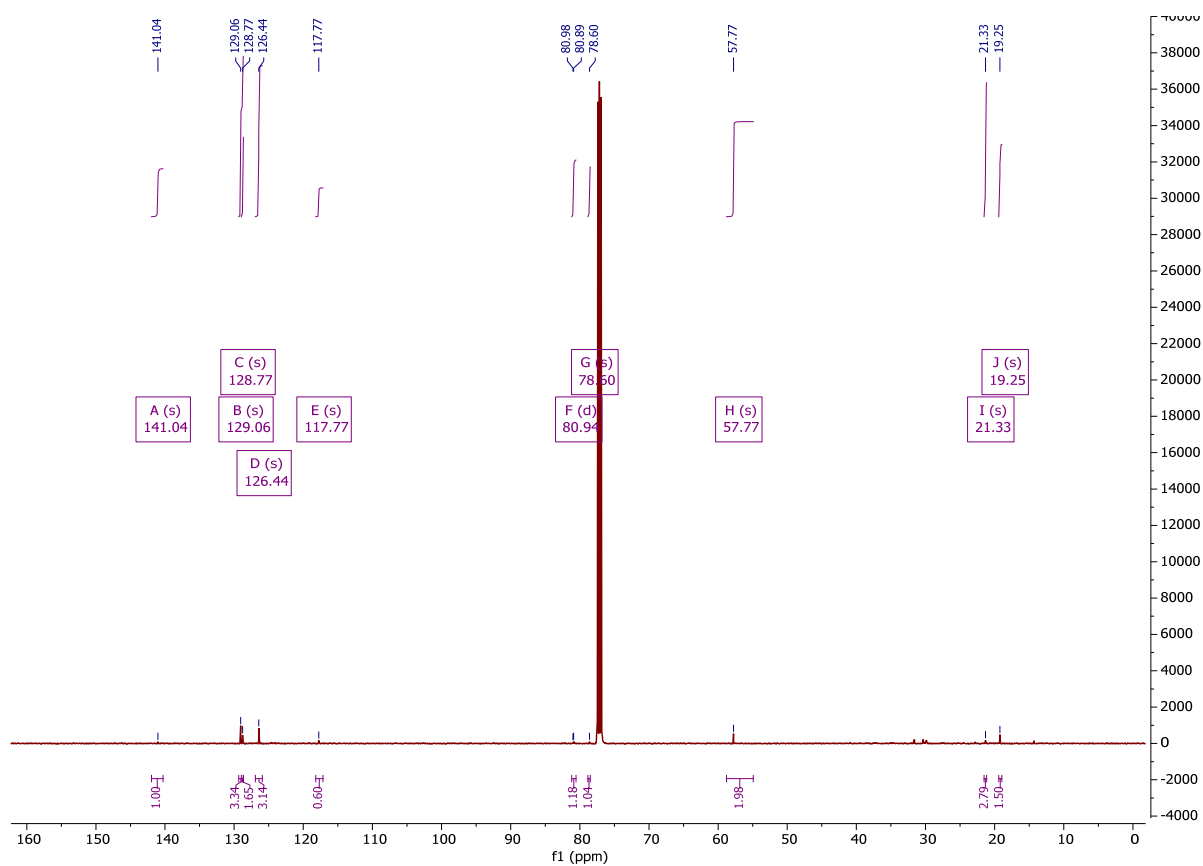

**Fig. S54**

$^{13}\text{C}$ -NMR spectrum of 3-((1-(pentafluoro- $\lambda^6$ -sulfaneyl)-2-phenylpropan-2-yl)oxy)propanenitrile (**21**) in  $\text{CDCl}_3$ .



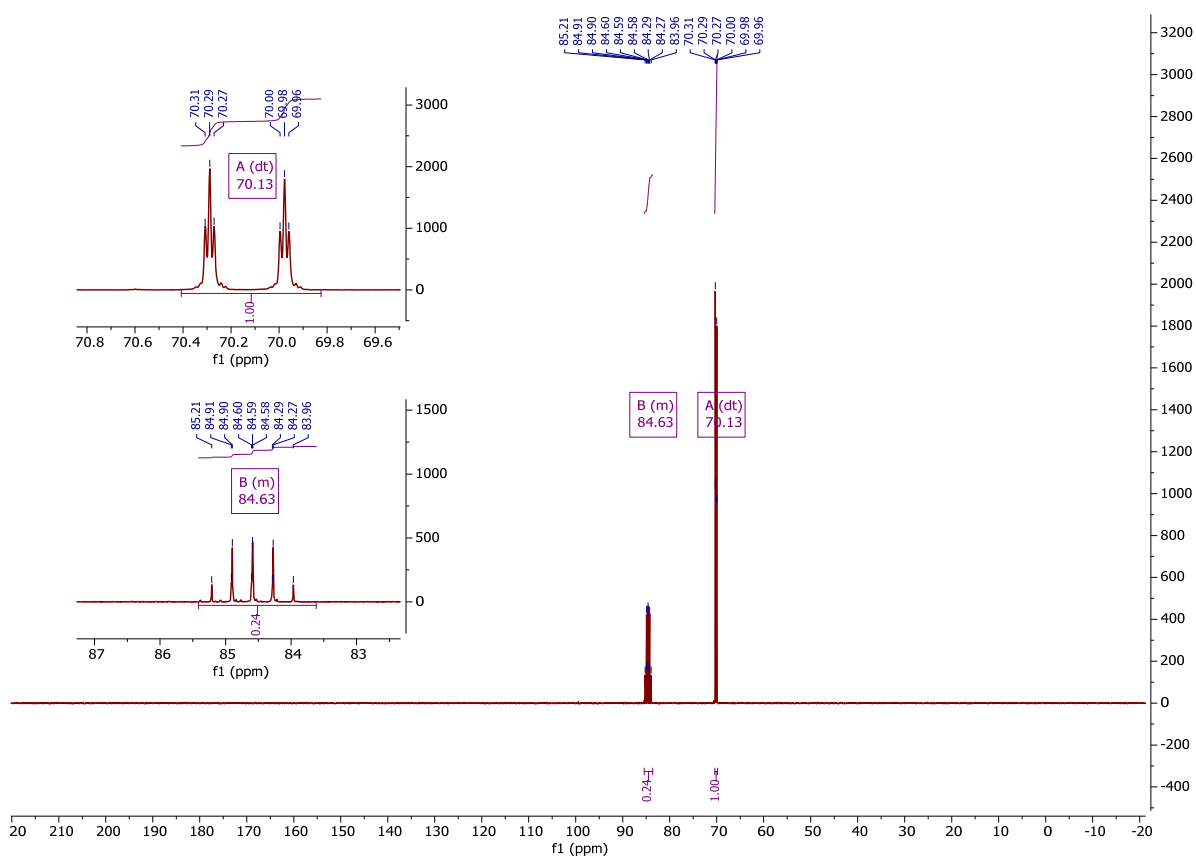

**Fig. S55**

$^{19}\text{F}$ -NMR spectrum of 3-((1-(pentafluoro- $\lambda^6$ -sulfaneyl)-2-phenylpropan-2-yl)oxy)propanenitrile (**21**) in  $\text{CDCl}_3$ .

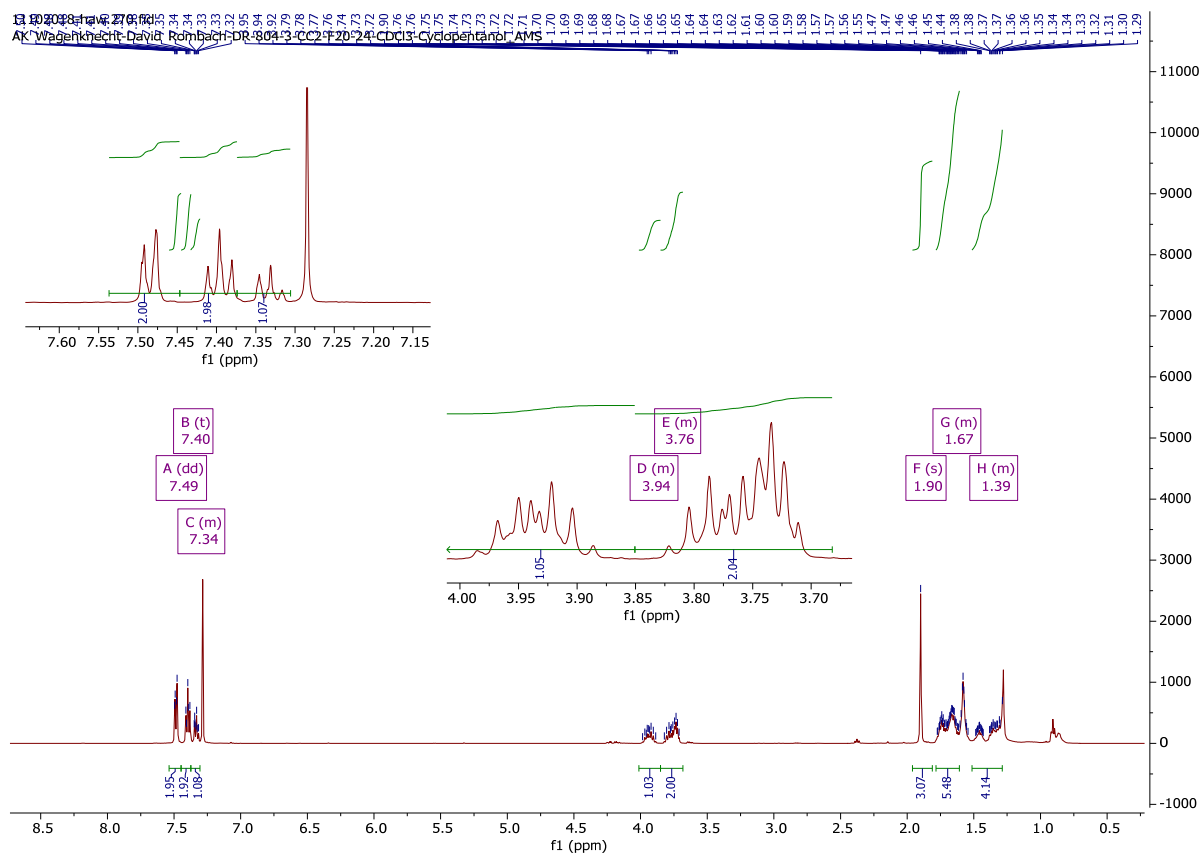

**Fig. S56**

<sup>1</sup>H-NMR spectrum of (2-(cyclopentyloxy)-2-phenylpropyl)pentafluoro-λ<sup>6</sup>-sulfane (**22**) in CDCl<sub>3</sub>.

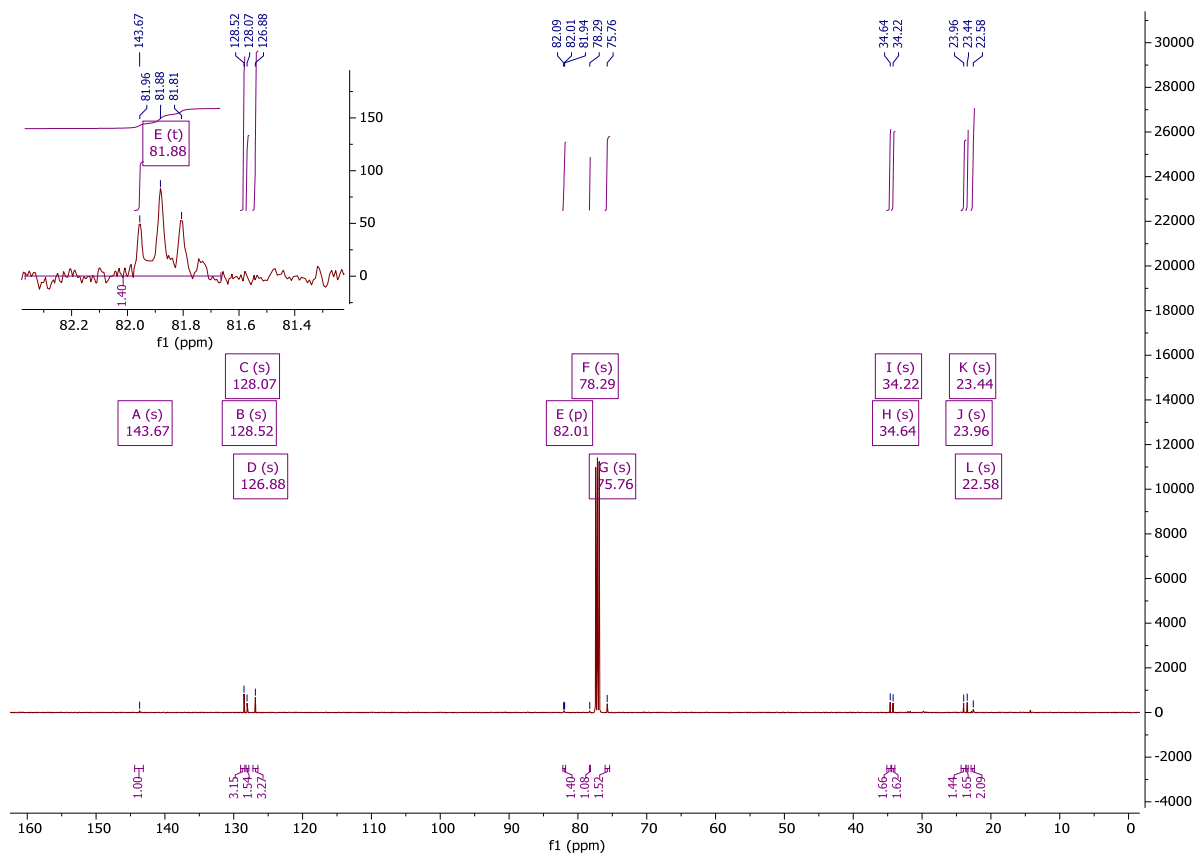

**Fig. S57**

<sup>13</sup>C-NMR spectrum of (2-(cyclopentyloxy)-2-phenylpropyl)pentafluoro-λ<sup>6</sup>-sulfane (**22**) in CDCl<sub>3</sub>.

11102018-haw.272.fid  
AK Wagenknecht-David Rombach-DR-804-3-CC2-F20-24-CDCl3-Cyclopentanol\_AMS

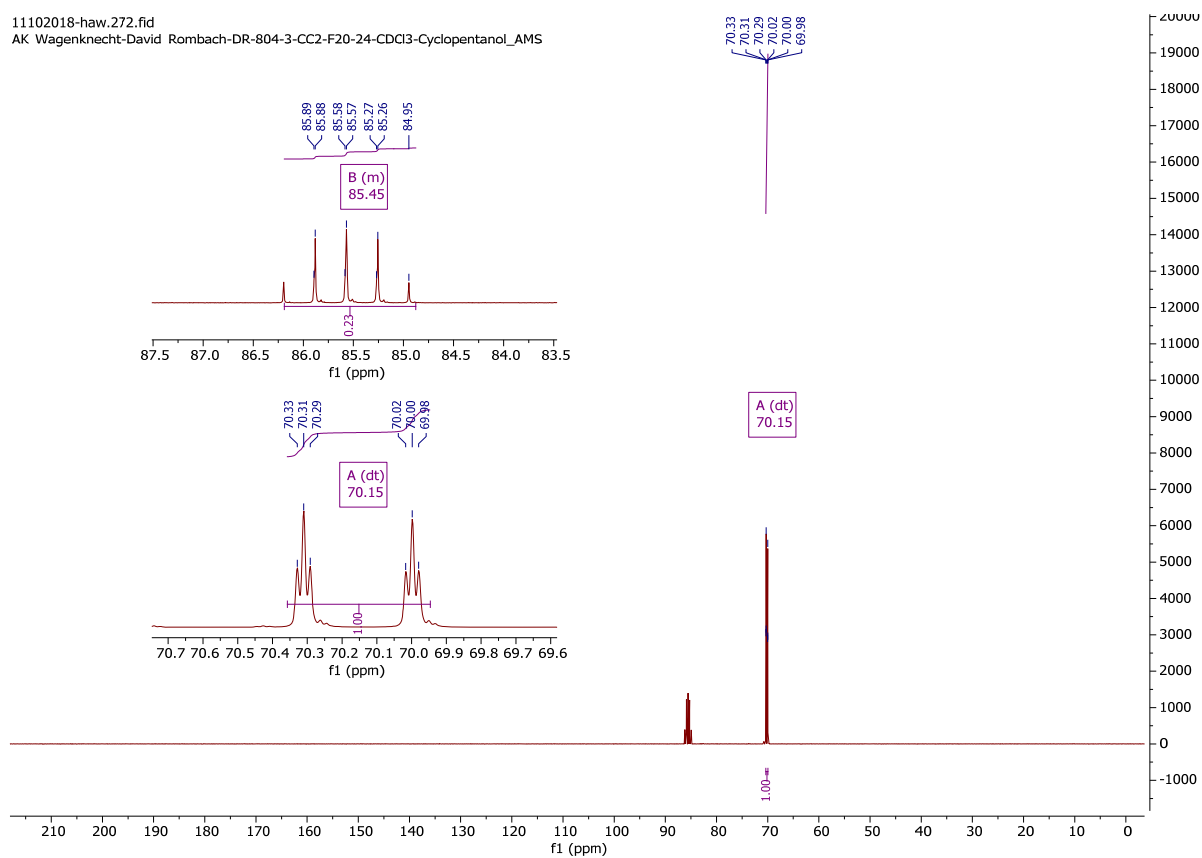

**Fig. S58**

$^{19}\text{F}$ -NMR spectrum of (2-(cyclopentyloxy)-2-phenylpropyl)pentafluoro- $\lambda^6$ -sulfane (**22**) in  $\text{CDCl}_3$ .

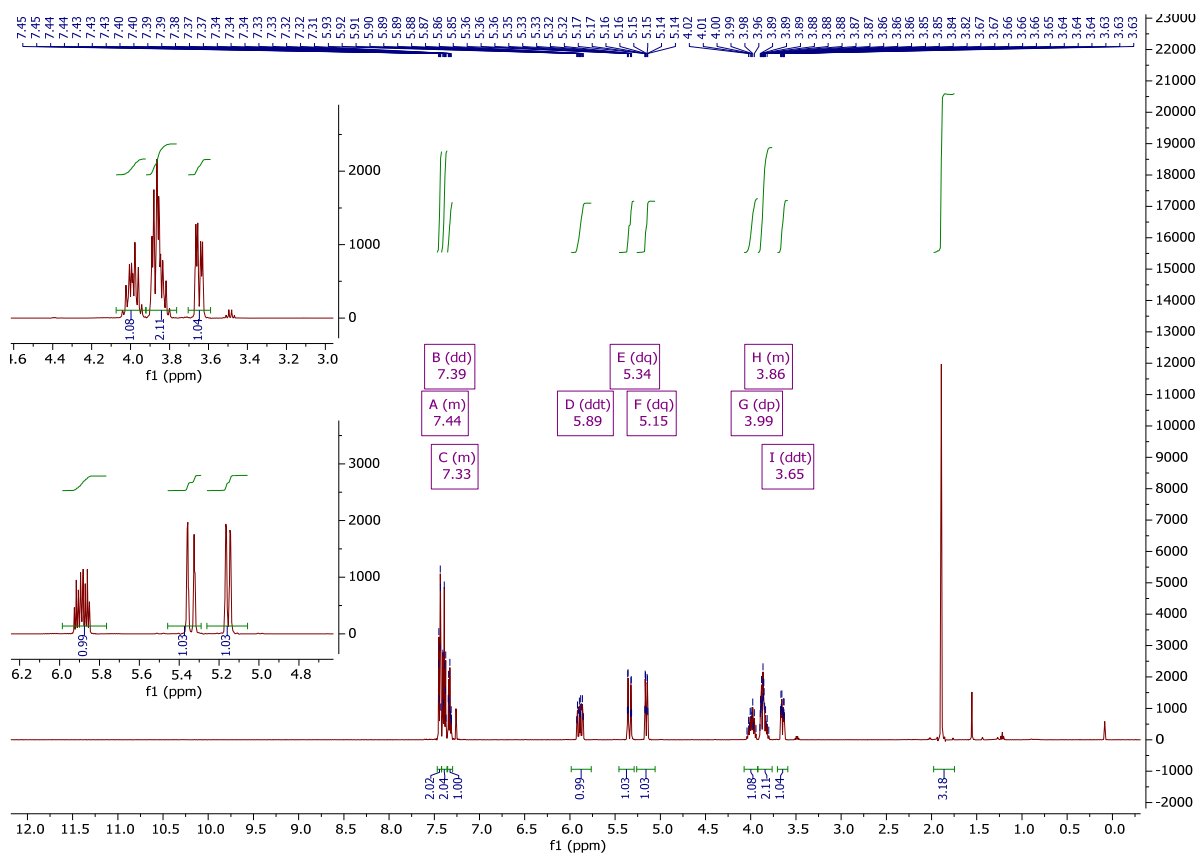

**Fig. S59**

$^1\text{H-NMR}$  spectrum of (2-(allyloxy)-2-phenylpropyl)pentafluoro- $\lambda^6$ -sulfane (**23**) in  $\text{CDCl}_3$ .

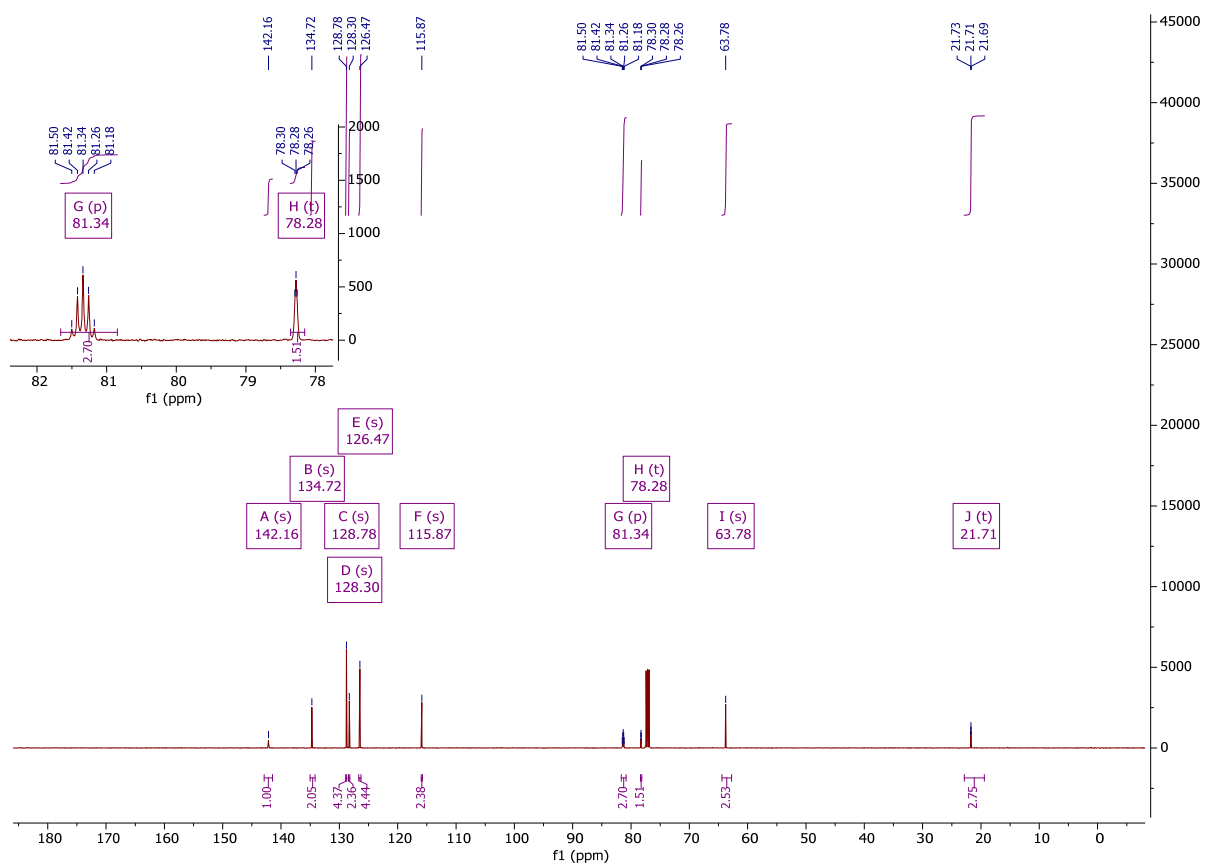

**Fig. S60**

$^{13}\text{C}$ -NMR spectrum of (2-(allyloxy)-2-phenylpropyl)pentafluoro- $\lambda^6$ -sulfane (**23**) in  $\text{CDCl}_3$ .

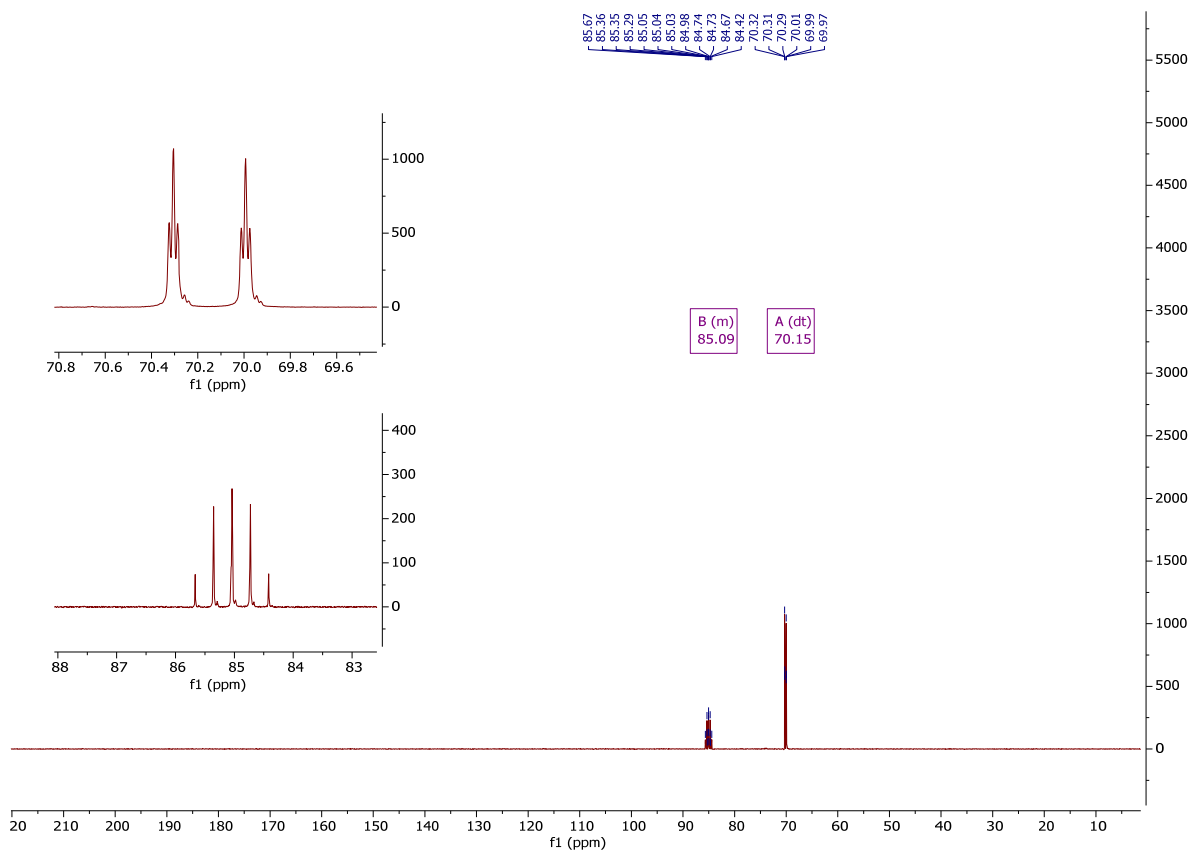

**Fig. S61**

$^{19}\text{F}$ -NMR spectrum of (2-(allyloxy)-2-phenylpropyl)pentafluoro- $\lambda^6$ -sulfane (**23**) in  $\text{CDCl}_3$ .

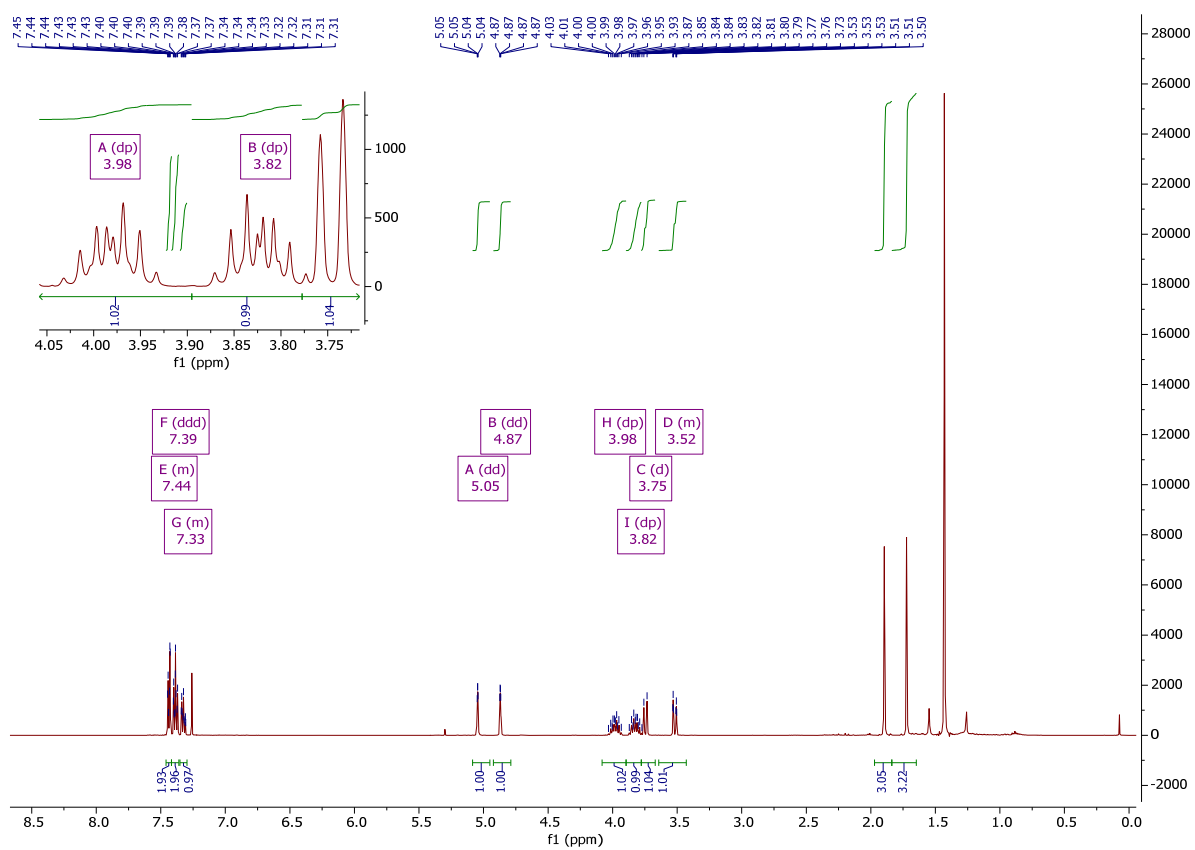

**Fig. S62**

<sup>1</sup>H - NMR spectrum of pentafluoro(2-((2-methylallyl)oxy)-2-phenylpropyl)-λ<sup>6</sup>-sulfane (**24**) in CDCl<sub>3</sub>.



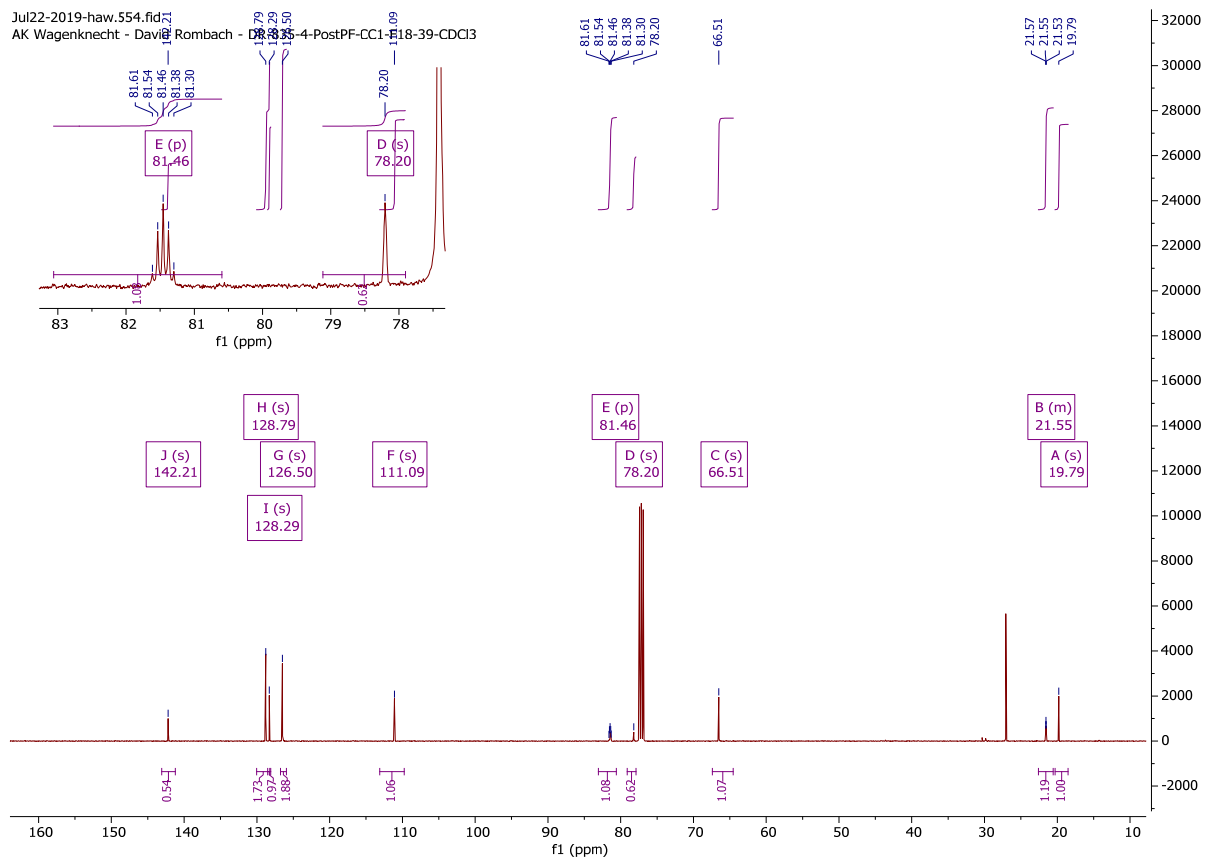

**Fig. S63**

<sup>13</sup>C-NMR spectrum of pentafluoro(2-((2-methylallyl)oxy)-2-phenylpropyl)-λ<sup>6</sup>-sulfane (**24**) in CDCl<sub>3</sub>.

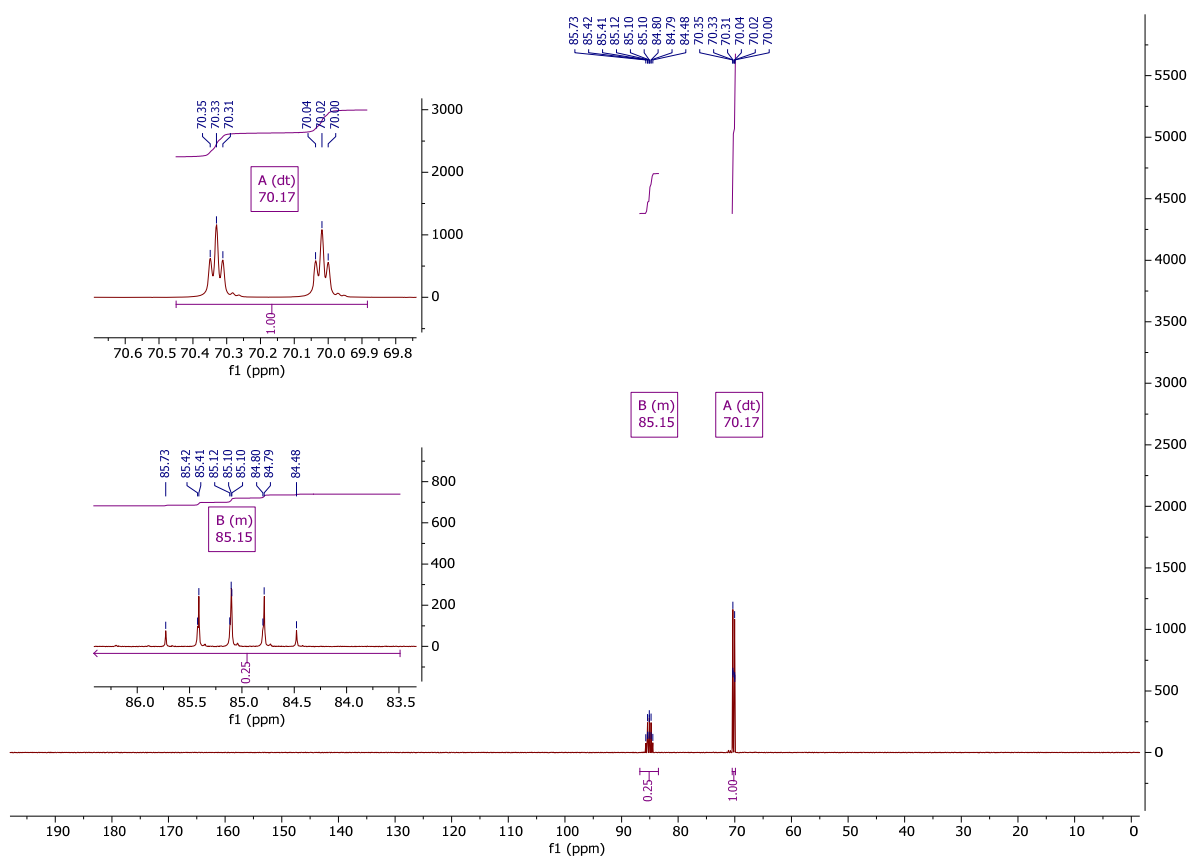

**Fig. S64**

$^{19}\text{F}$ -NMR spectrum of pentafluoro(2-((2-methylallyl)oxy)-2-phenylpropyl)- $\lambda^6$ -sulfane (**24**) in  $\text{CDCl}_3$ .

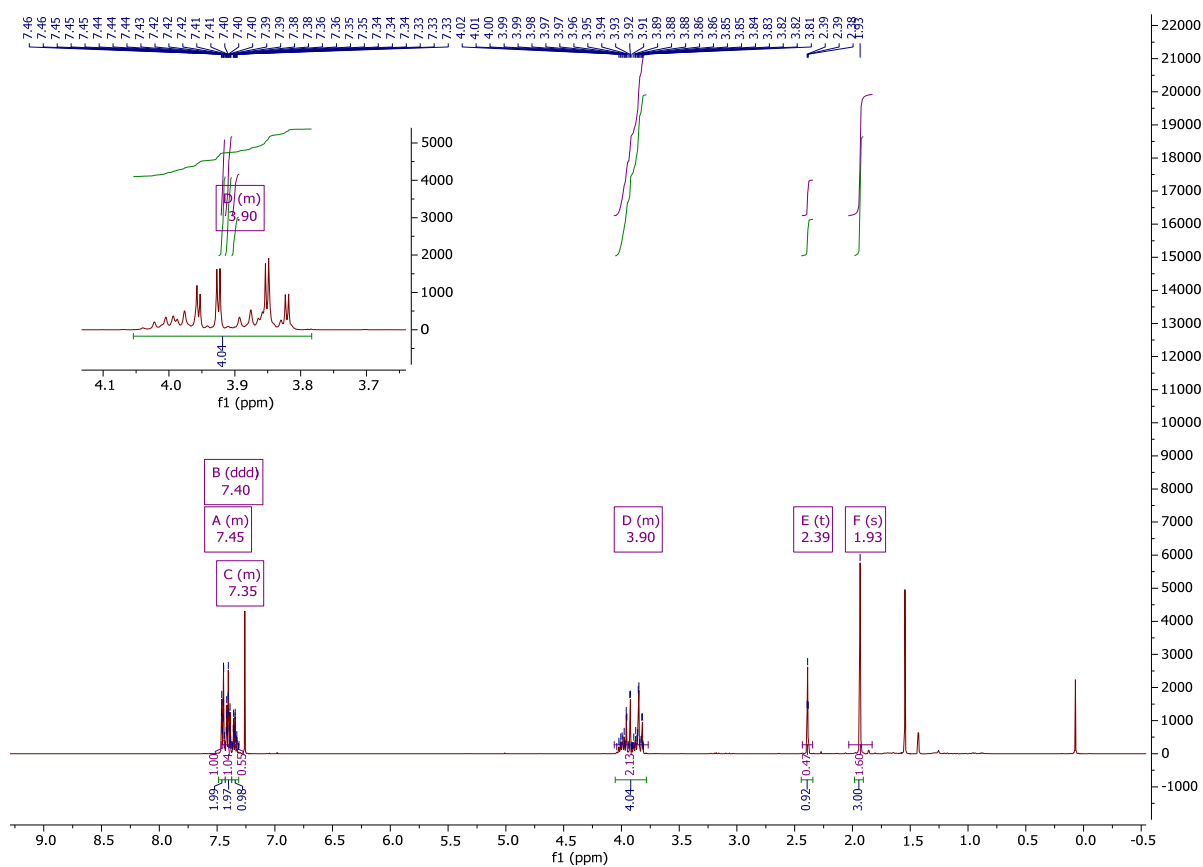

**Fig. S65**

$^1\text{H}$ -NMR spectrum of pentafluoro(2-phenyl-2-(prop-2-yn-1-yloxy)propyl)- $\lambda^6$ -sulfane (**25**) in  $\text{CDCl}_3$ .

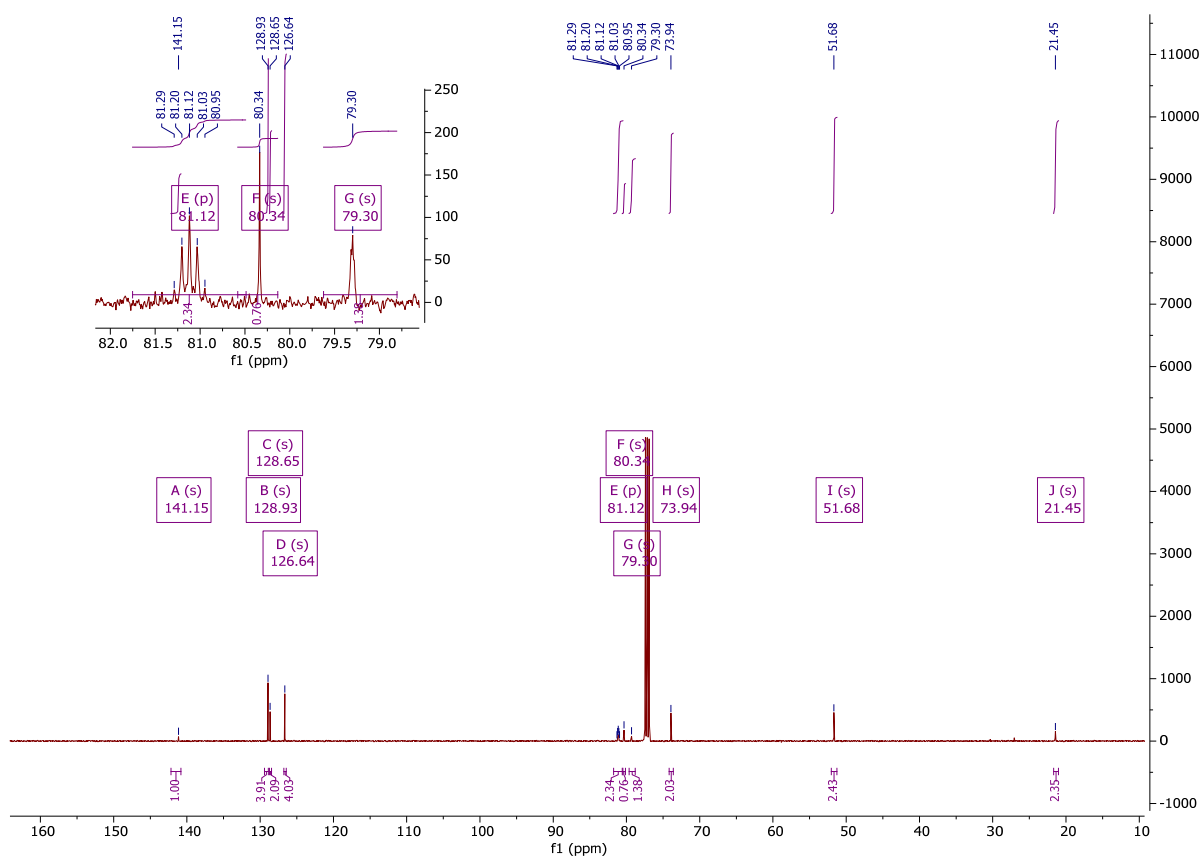

**Fig. S66**

$^{13}\text{C}$ -NMR spectrum of pentafluoro(2-phenyl-2-(prop-2-yn-1-yloxy)propyl)- $\lambda^6$ -sulfane (**25**) in  $\text{CDCl}_3$ .

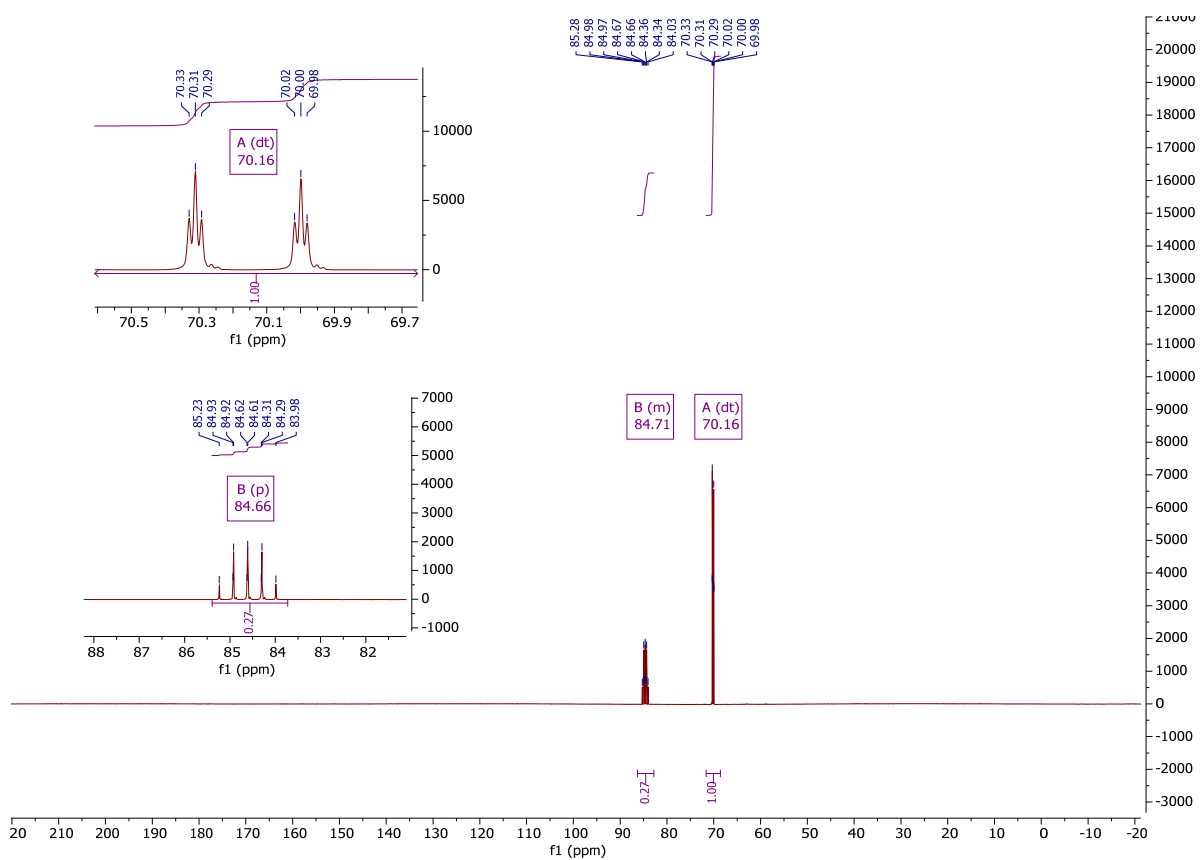

**Fig. S67**

$^{19}\text{F}$ -NMR spectrum of pentafluoro(2-phenyl-2-(prop-2-yn-1-yloxy)propyl)- $\lambda^6$ -sulfane (**25**) in  $\text{CDCl}_3$ .

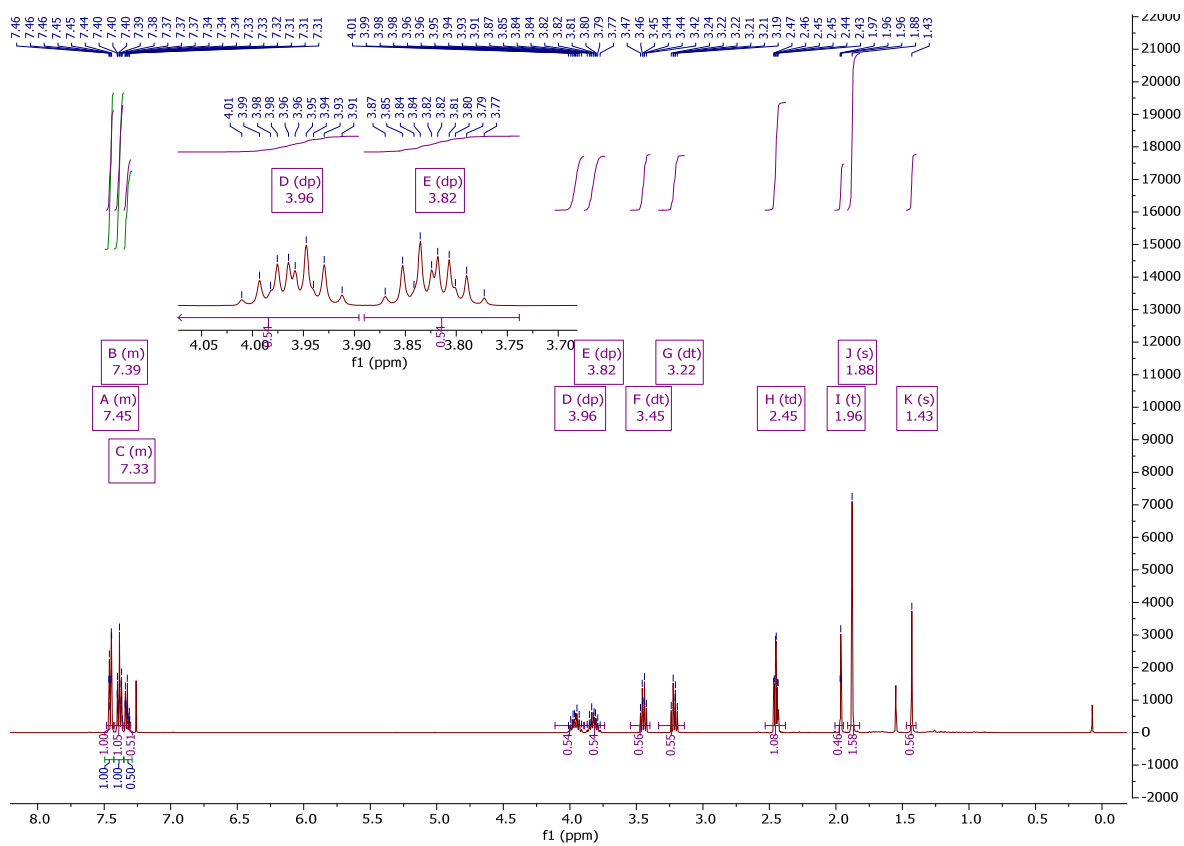

**Fig. S68**

<sup>1</sup>H-NMR spectrum of (2-(but-3-yn-1-yloxy)-2-phenylpropyl)pentafluoro-λ<sup>6</sup>-sulfane (**26**) in CDCl<sub>3</sub>.

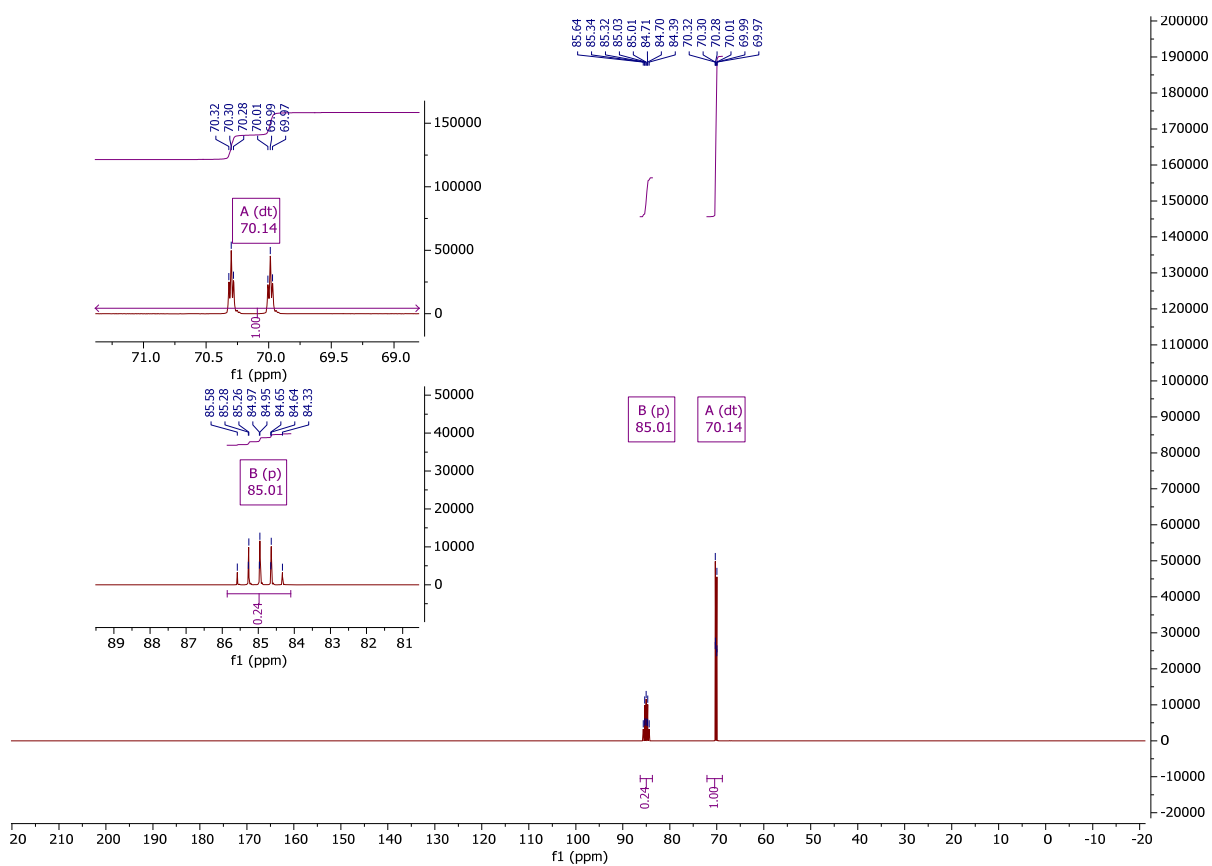

**Fig. S69**

$^{19}\text{F}$ -NMR spectrum of (2-(but-3-yn-1-yloxy)-2-phenylpropyl)pentafluoro- $\lambda^6$ -sulfane (**26**) in  $\text{CDCl}_3$ .

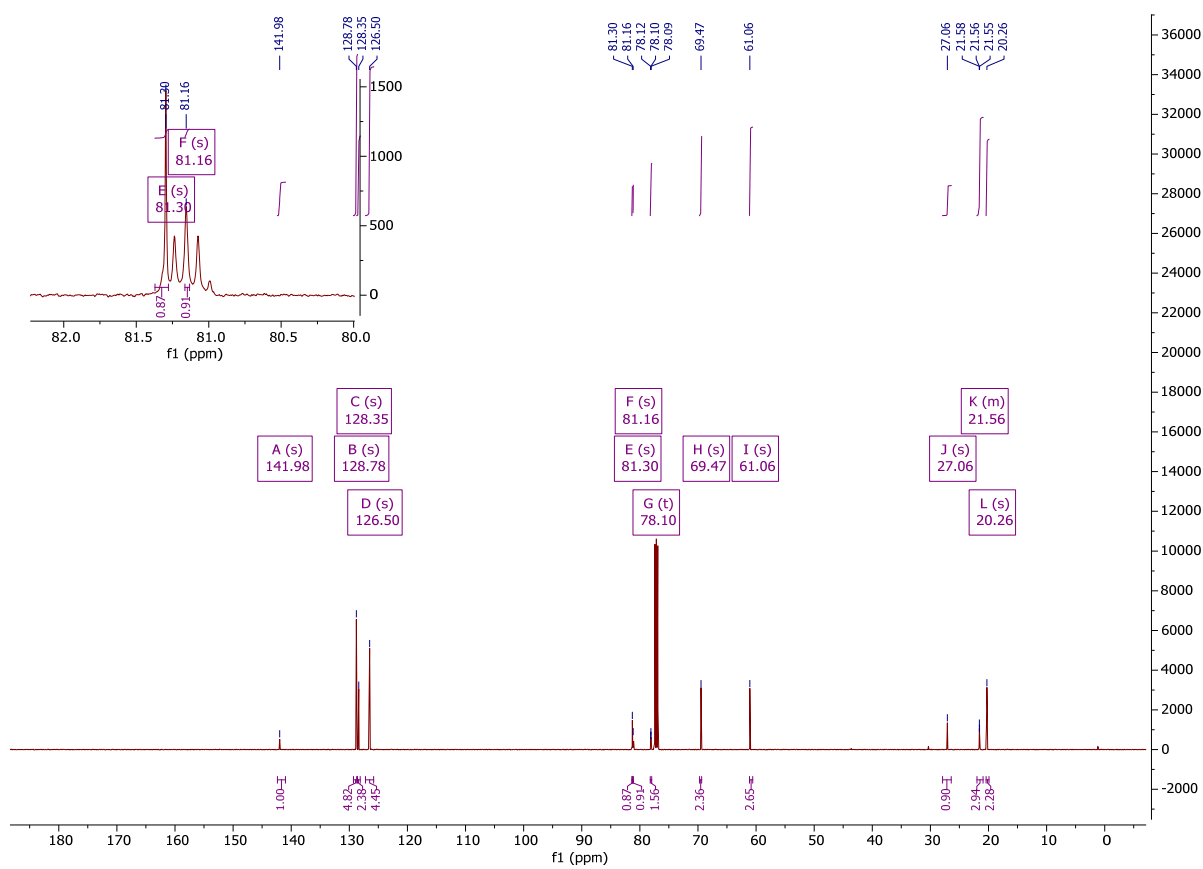

**Fig. S70**

$^{13}\text{C}$ -NMR spectrum of (2-(but-3-yn-1-yloxy)-2-phenylpropyl)pentafluoro- $\lambda^6$ -sulfane (**26**) in  $\text{CDCl}_3$ .



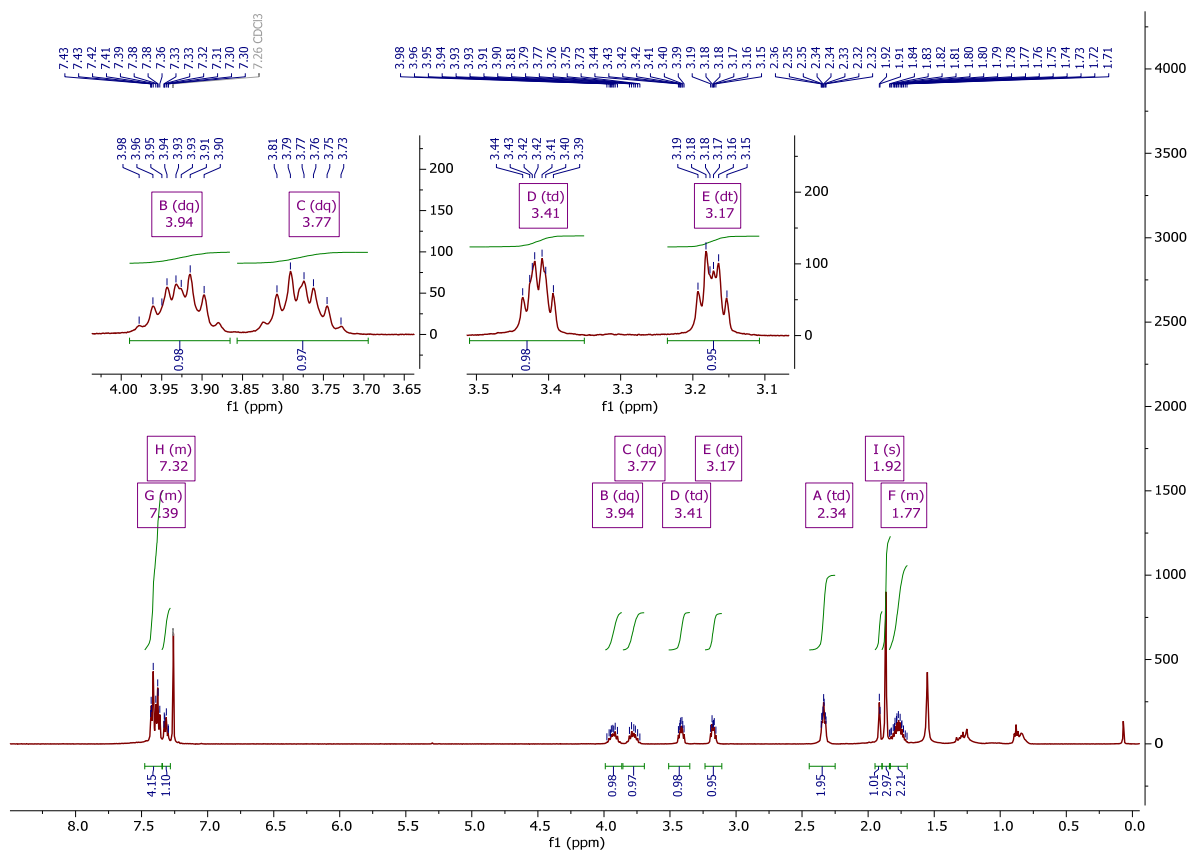

**Fig. S71**

<sup>1</sup>H - NMR of spectrum pentafluoro(2-(pent-4-yn-1-yloxy)-2-phenylpropyl)-λ<sup>6</sup>-sulfane (**27**) in CDCl<sub>3</sub>.

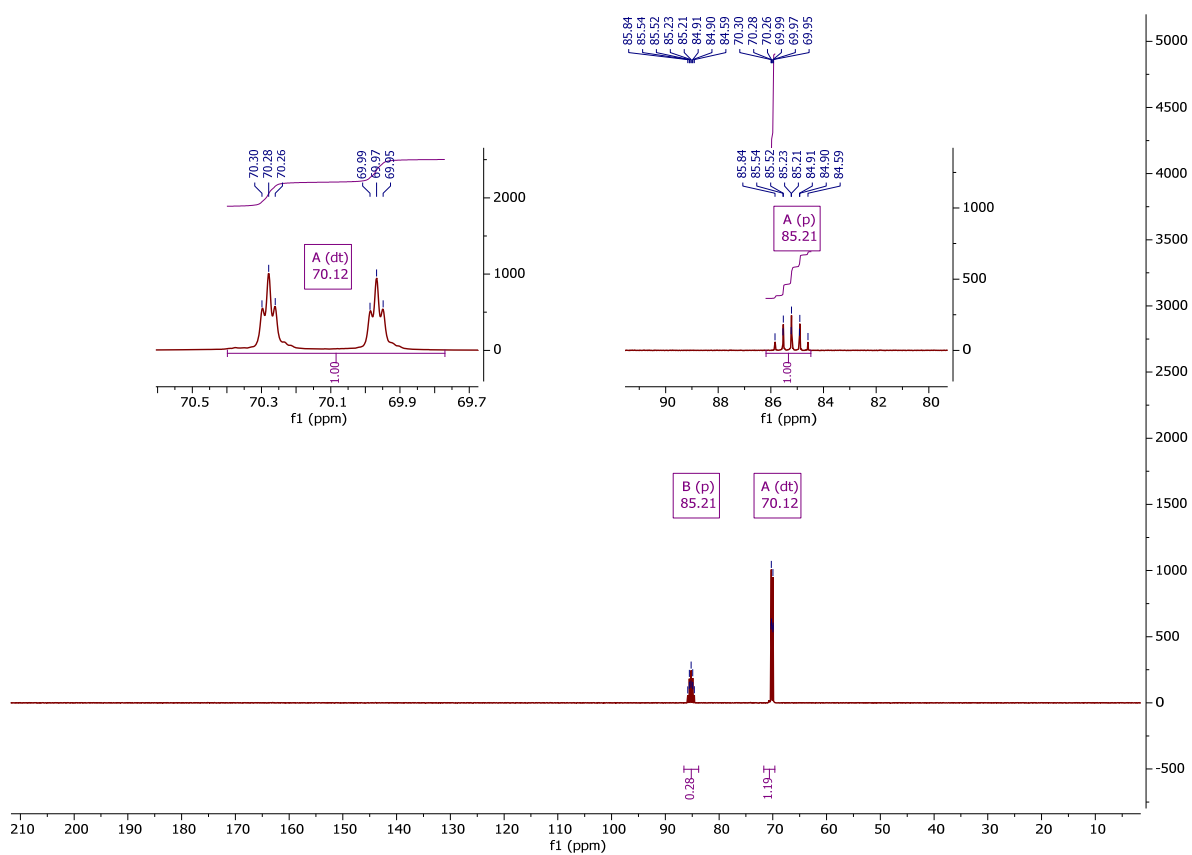

**Fig. S72**

$^{19}\text{F}$ -NMR of spectrum pentafluoro(2-(pent-4-yn-1-yloxy)-2-phenylpropyl)- $\lambda^6$ -sulfane (**27**) in  $\text{CDCl}_3$ .

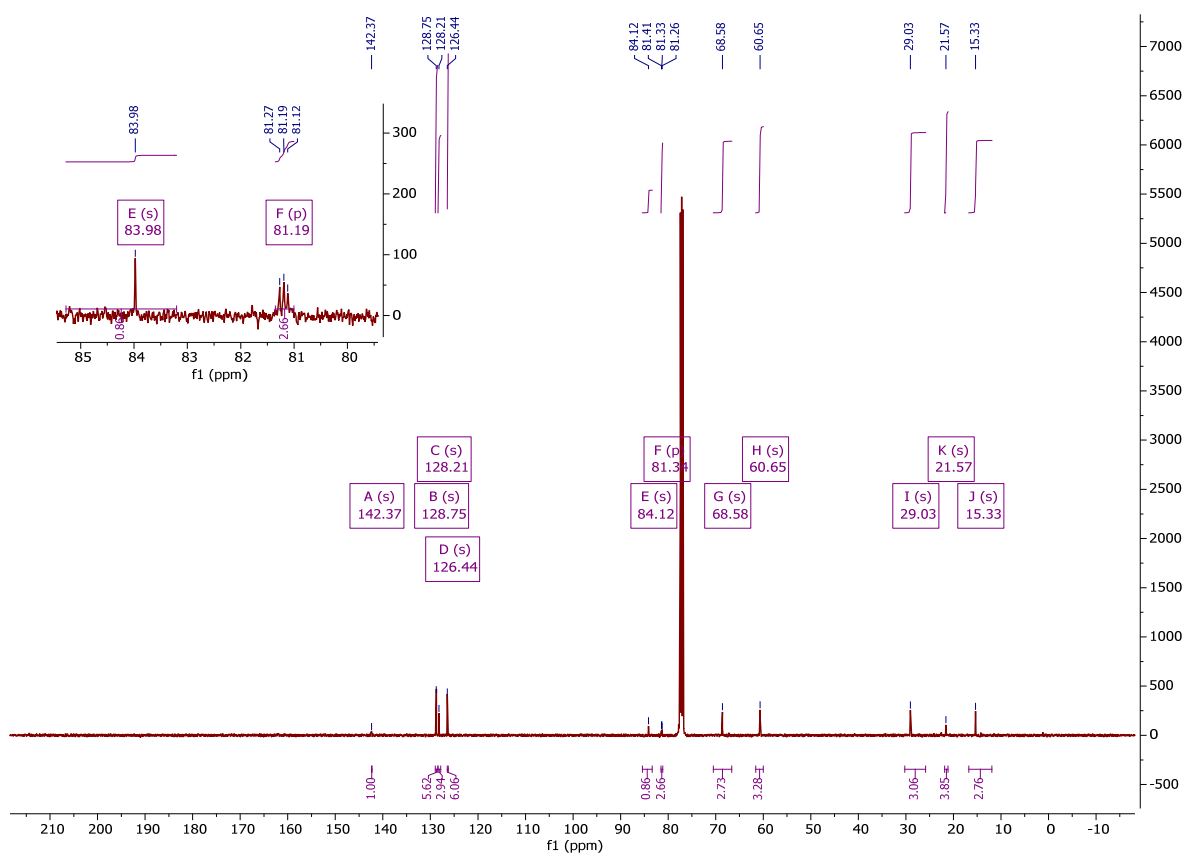

**Fig. S73**

<sup>13</sup>C-NMR of spectrum pentafluoro(2-(pent-4-yn-1-yloxy)-2-phenylpropyl)-λ<sup>6</sup>-sulfane (**27**) in CDCl<sub>3</sub>.

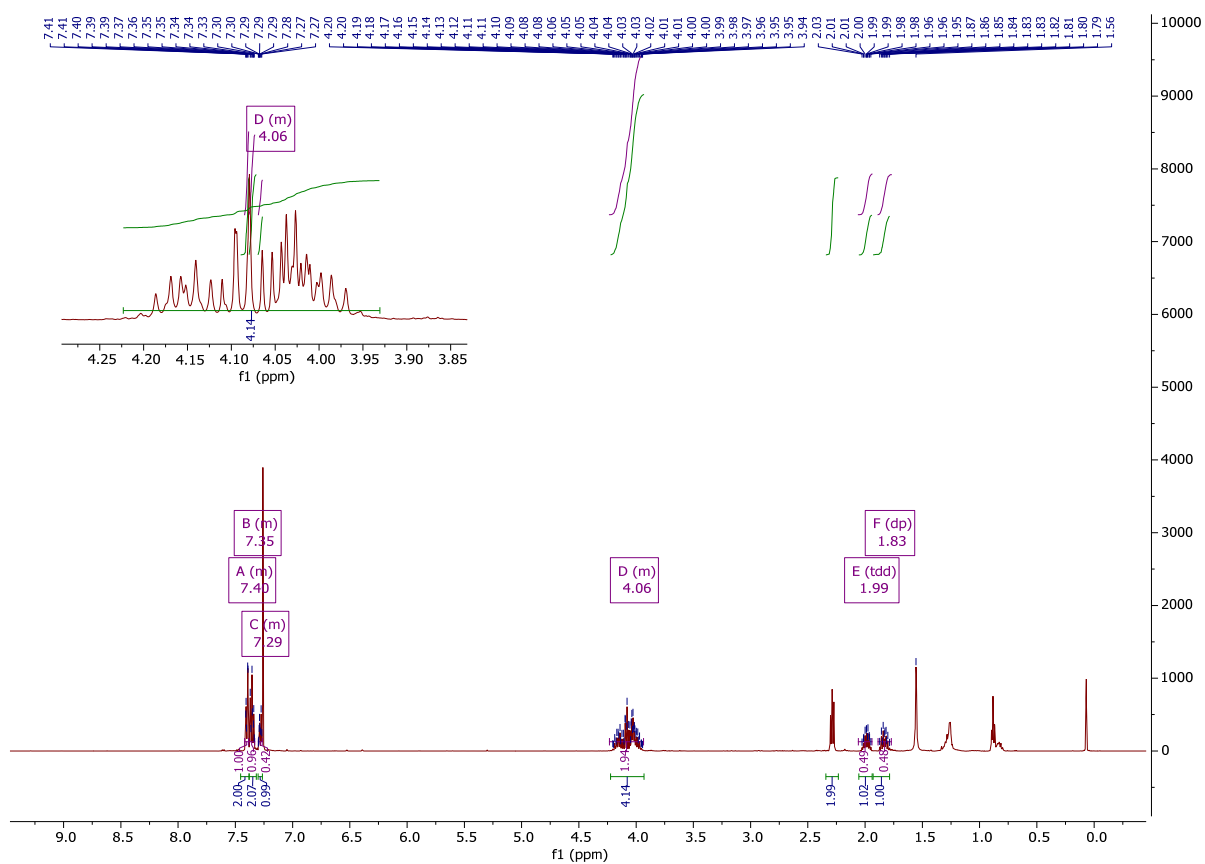

**Fig. S74**

<sup>1</sup>H - NMR spectrum of 2-((pentafluoro- $\lambda^6$ -sulfonyl)methyl)-2-phenyltetrahydrofuran (**28**) in CDCl<sub>3</sub>.

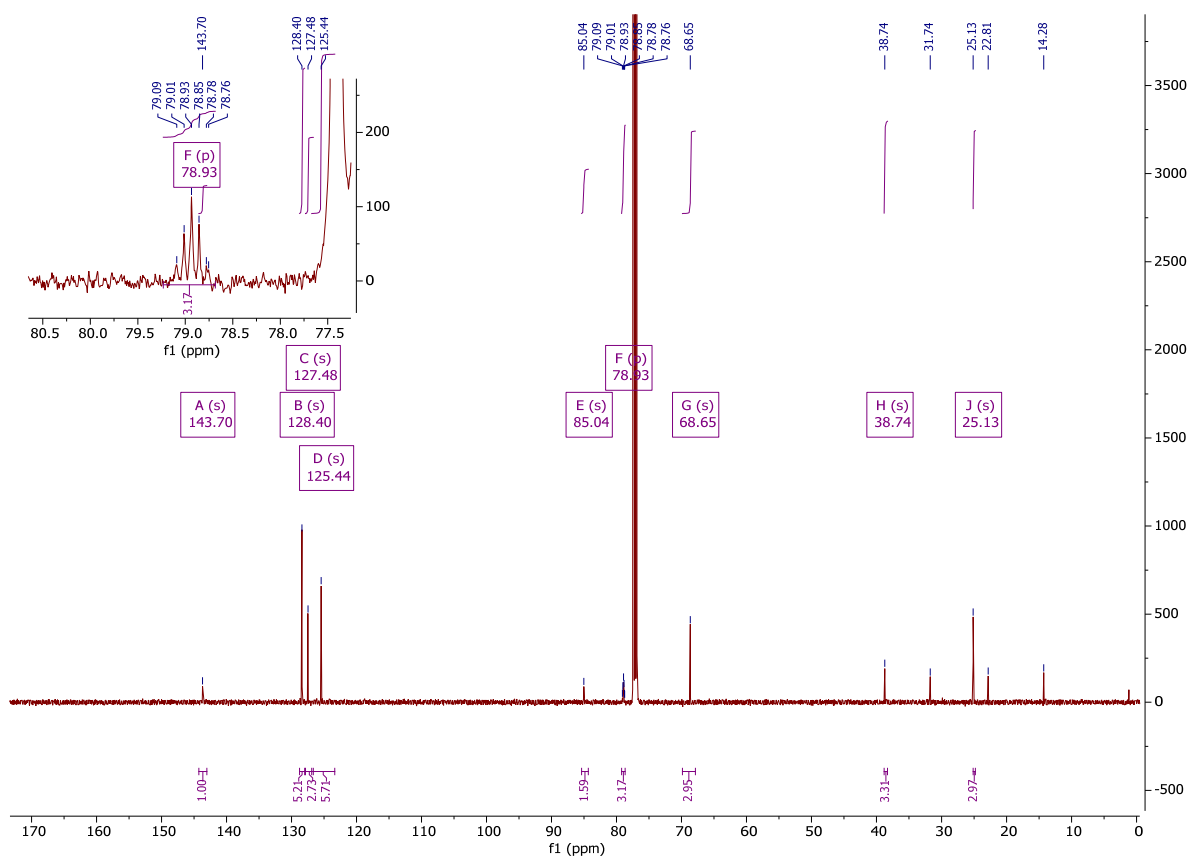

**Fig. S75**

$^{13}\text{C}$  - NMR spectrum of 2-((pentafluoro- $\lambda^6$ -sulfaneyl)methyl)-2-phenyltetrahydrofuran (**28**) in  $\text{CDCl}_3$ .

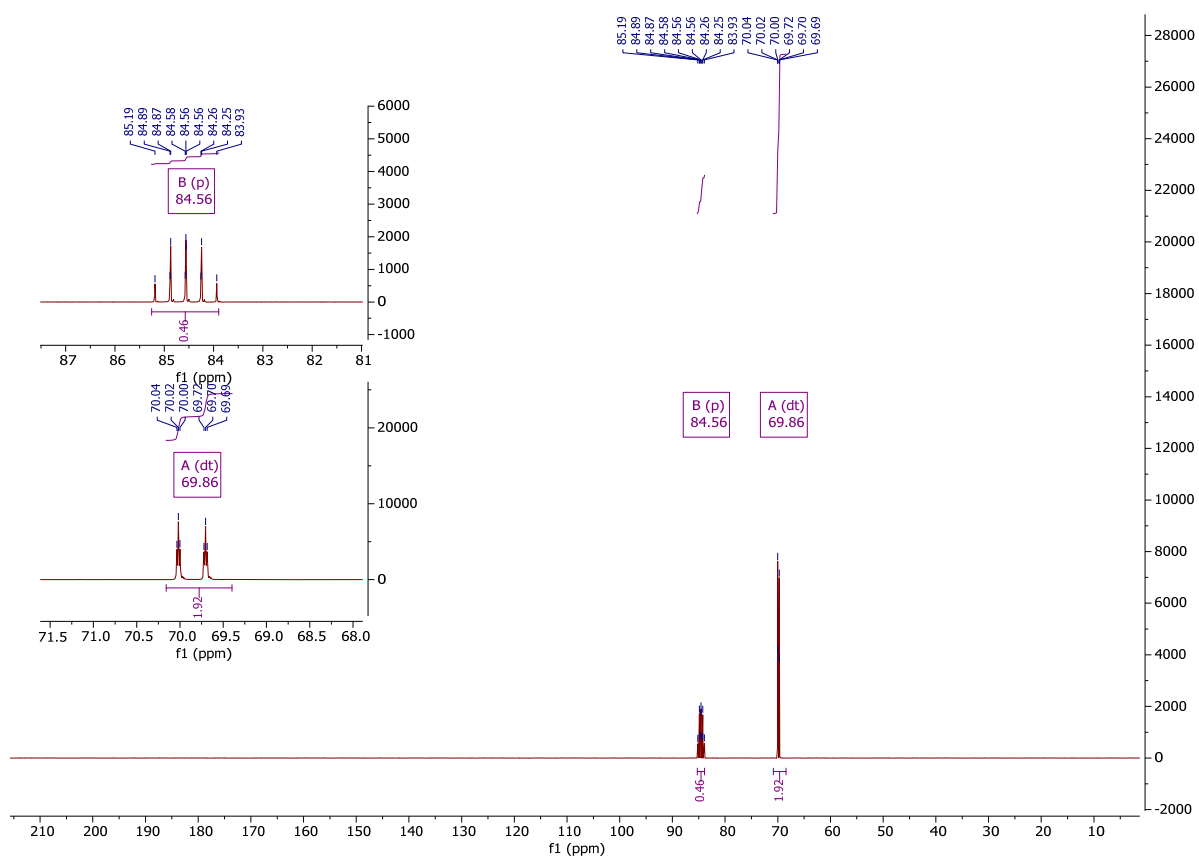

**Fig. S76**

$^{19}\text{F}$  - NMR spectrum of 2-((pentafluoro- $\lambda^6$ -sulfaneyl)methyl)-2-phenyltetrahydrofuran (**28**) in  $\text{CDCl}_3$ .

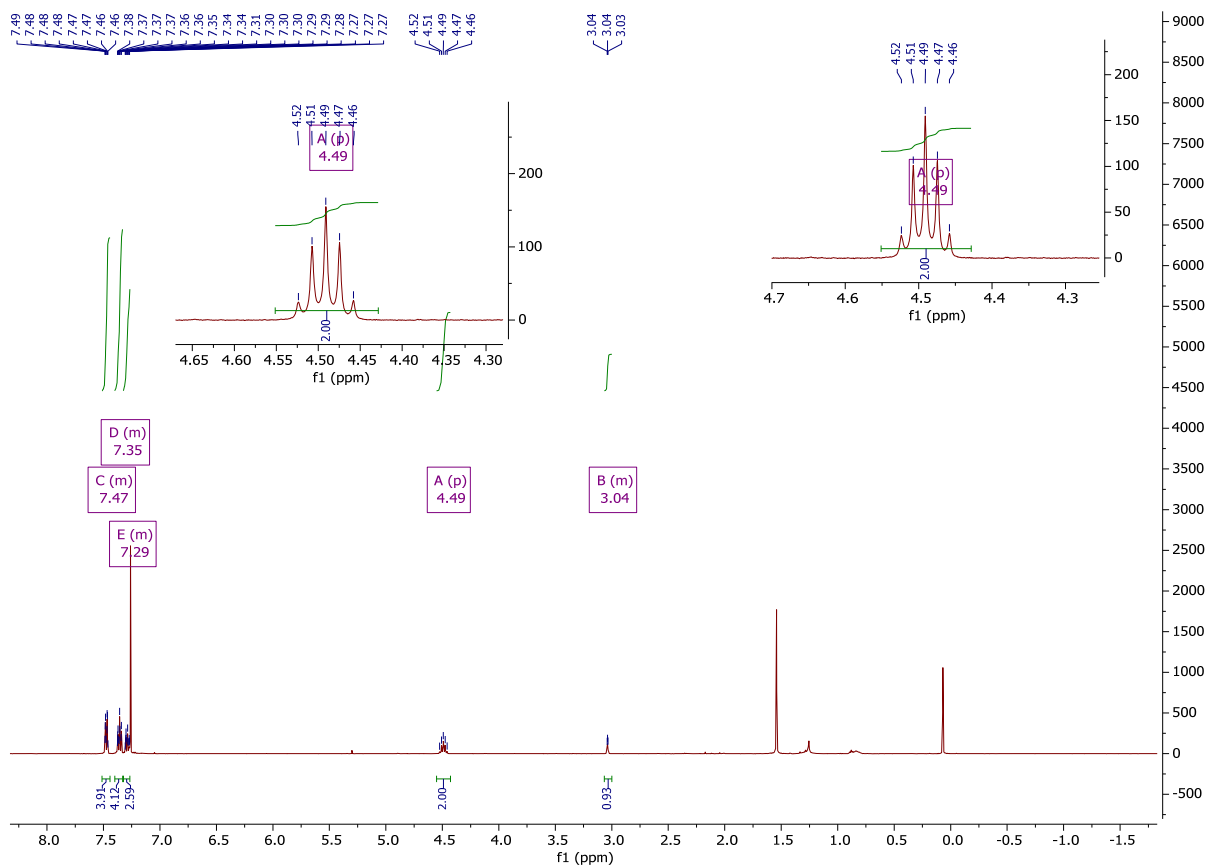

**Fig. S77**

$^1\text{H}$  - NMR spectrum of 2-(pentafluoro- $\lambda^6$ -sulfaneyl)-1,1-diphenylethan-1-ol (**29**) in  $\text{CDCl}_3$ .

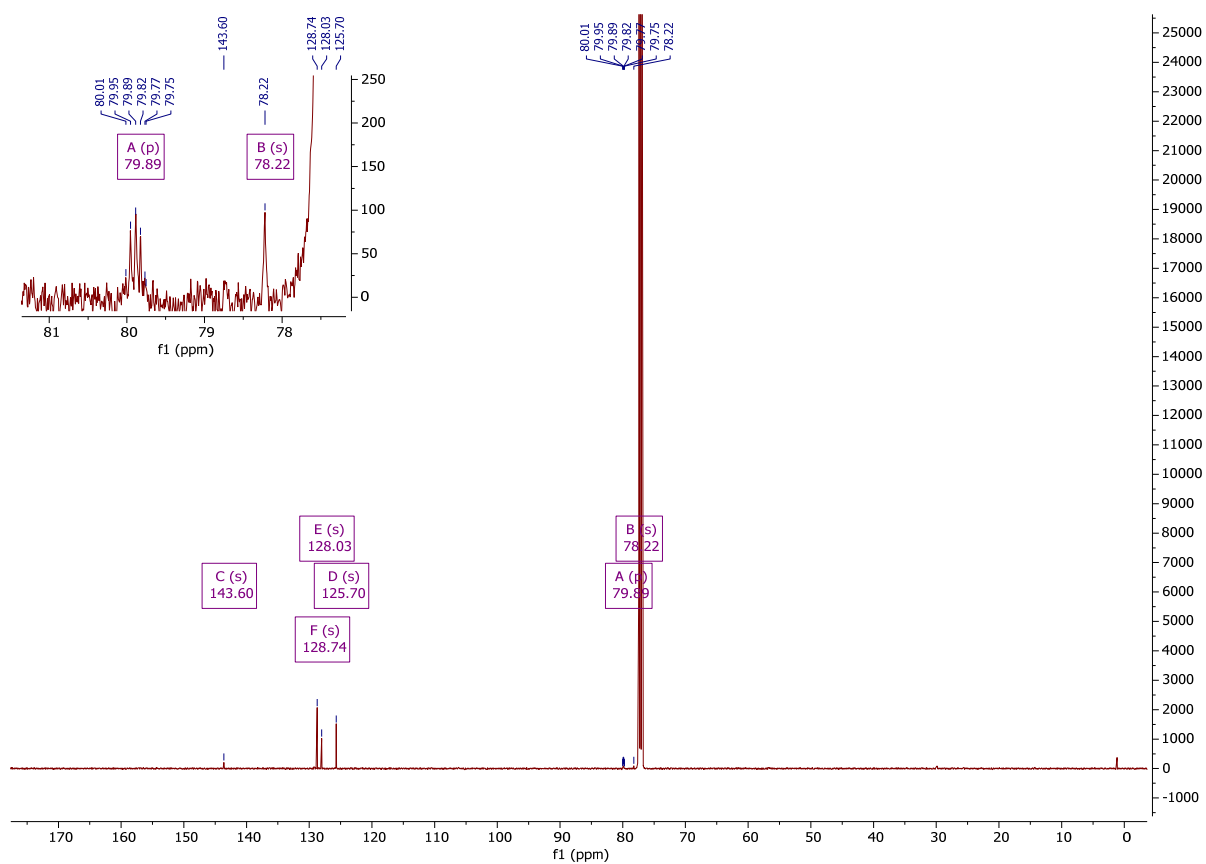

**Fig. S78**

$^{13}\text{C}$ -NMR spectrum of 2-(pentafluoro- $\lambda^6$ -sulfaneyl)-1,1-diphenylethan-1-ol (**29**) in  $\text{CDCl}_3$ .



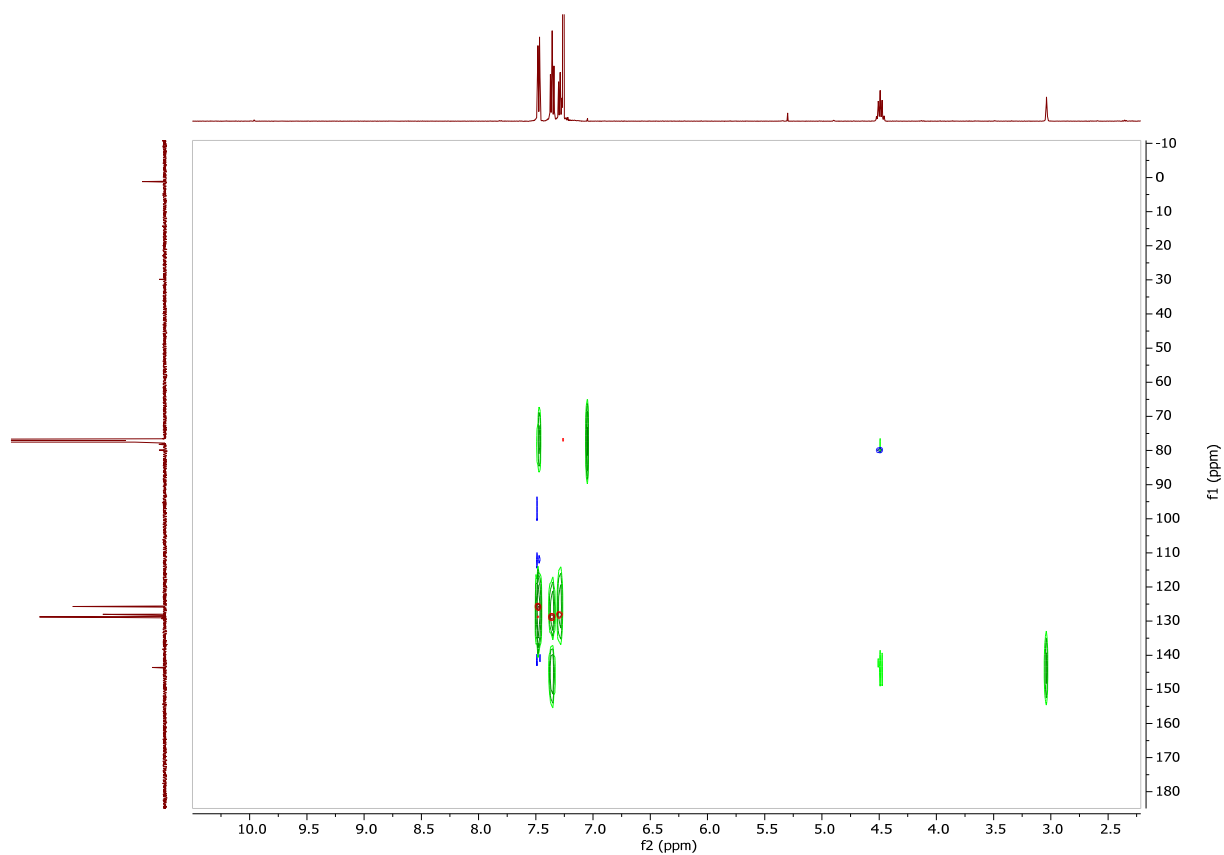

**Fig. S79**

Stacked  $^1\text{H}$ - $^{13}\text{C}$ - HSQCed/HMBC spectra of 2-(pentafluoro- $\lambda^6$ -sulfaneyl)-1,1-diphenylethan-1-ol (**29**) in  $\text{CDCl}_3$ .

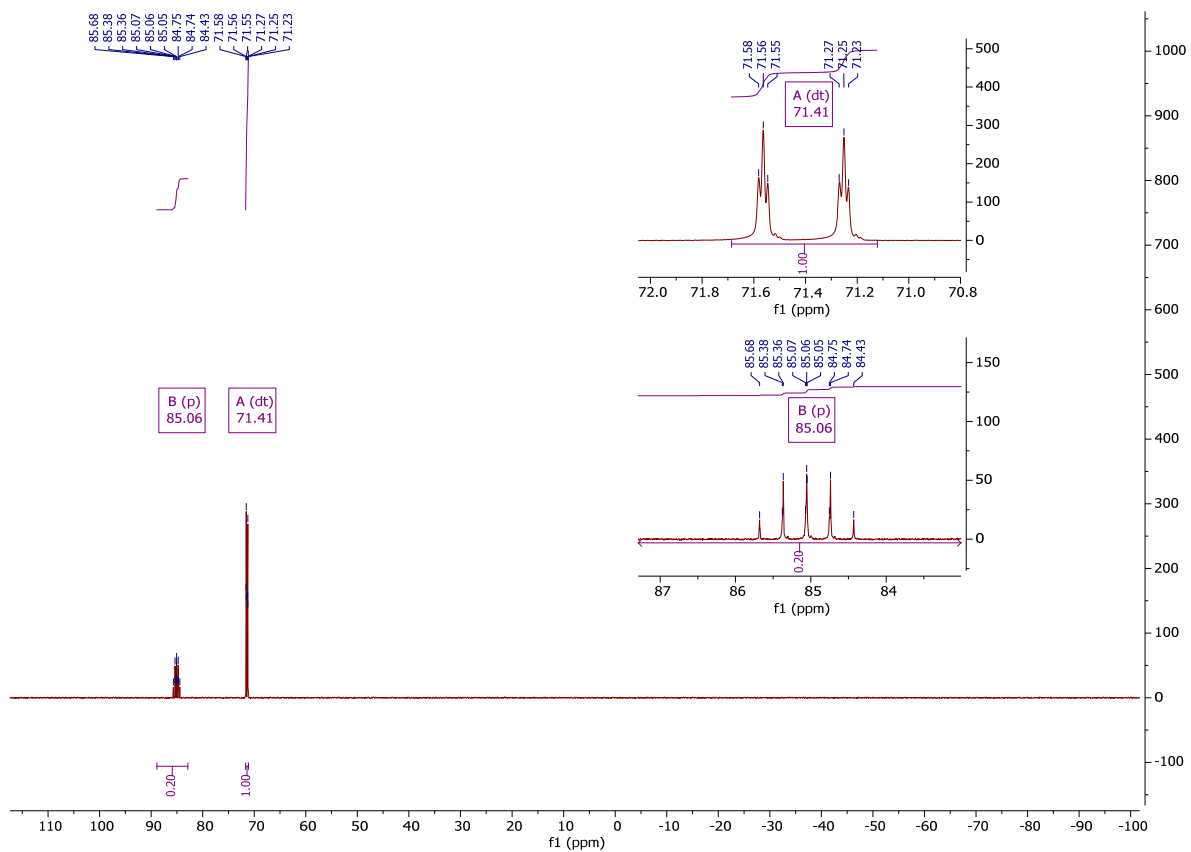

**Fig. S80**

$^{19}\text{F}$ -NMR spectrum of 2-(pentafluoro- $\lambda^6$ -sulfaneyl)-1,1-diphenylethan-1-ol (**29**) in  $\text{CDCl}_3$ .

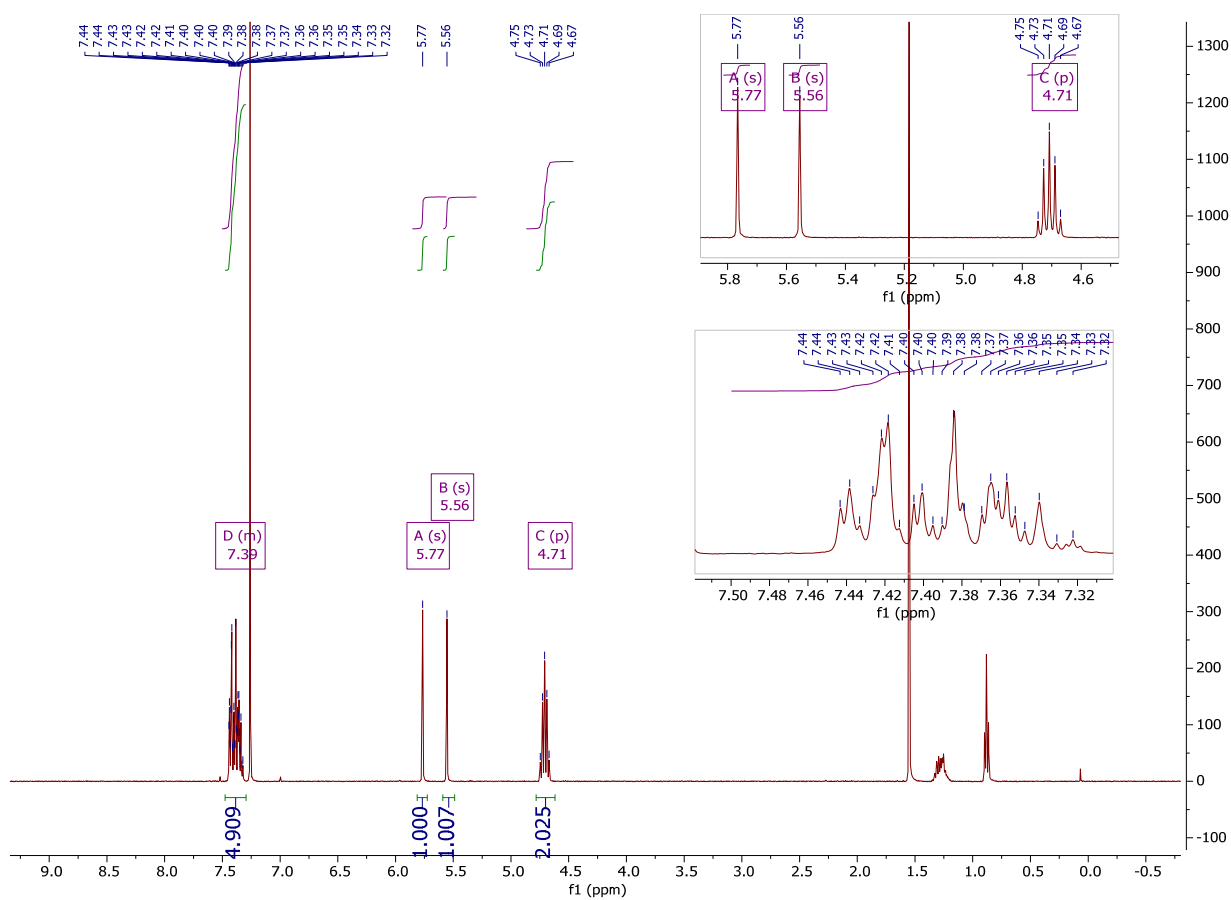

**Fig. S81**

$^1\text{H-NMR}$  spectrum of pentafluoro-(2-phenylallyl)- $\lambda^6$ -sulfane (**30**) in  $\text{CDCl}_3$  as previously reported.<sup>[S7]</sup>

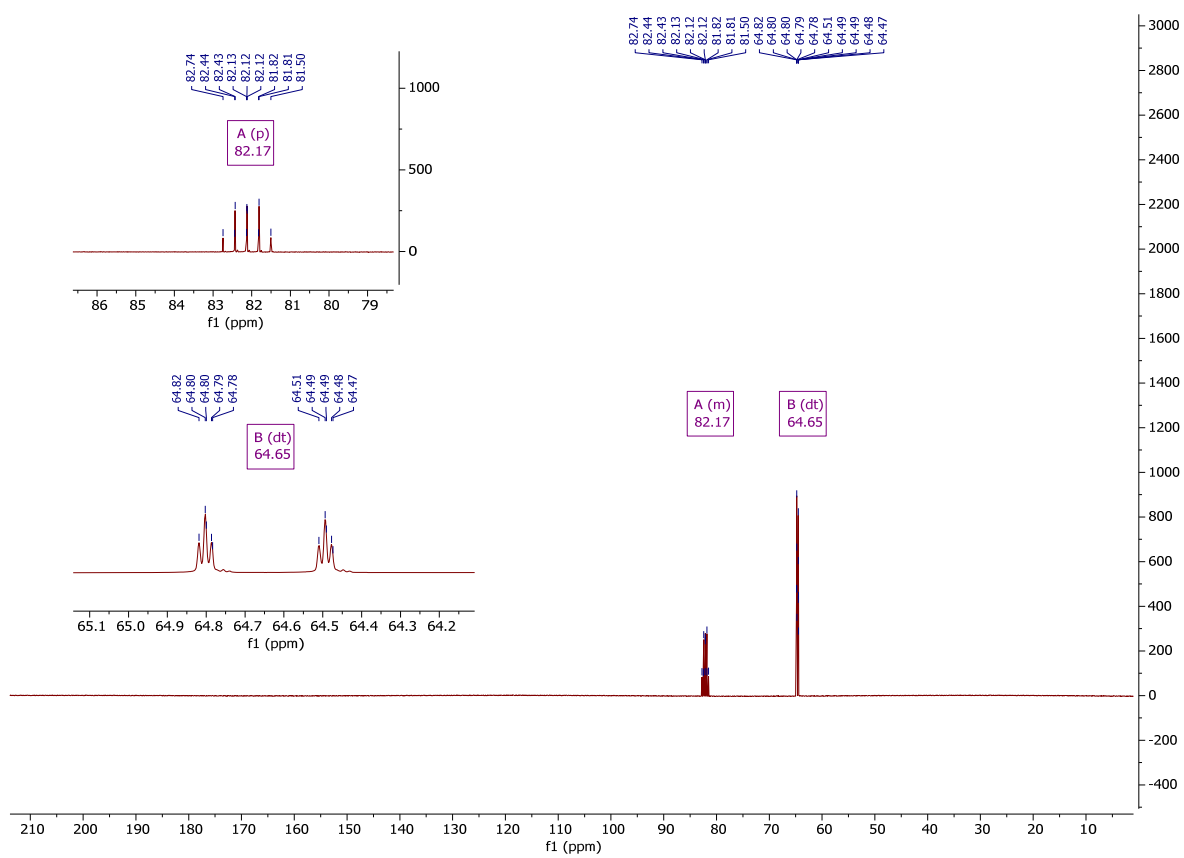

**Fig. S82**

$^{19}\text{F}$ -NMR spectrum of pentafluoro-(2-phenylallyl)- $\lambda^6$ -sulfane (**30**) in  $\text{CDCl}_3$  as previously reported.<sup>[S7]</sup>

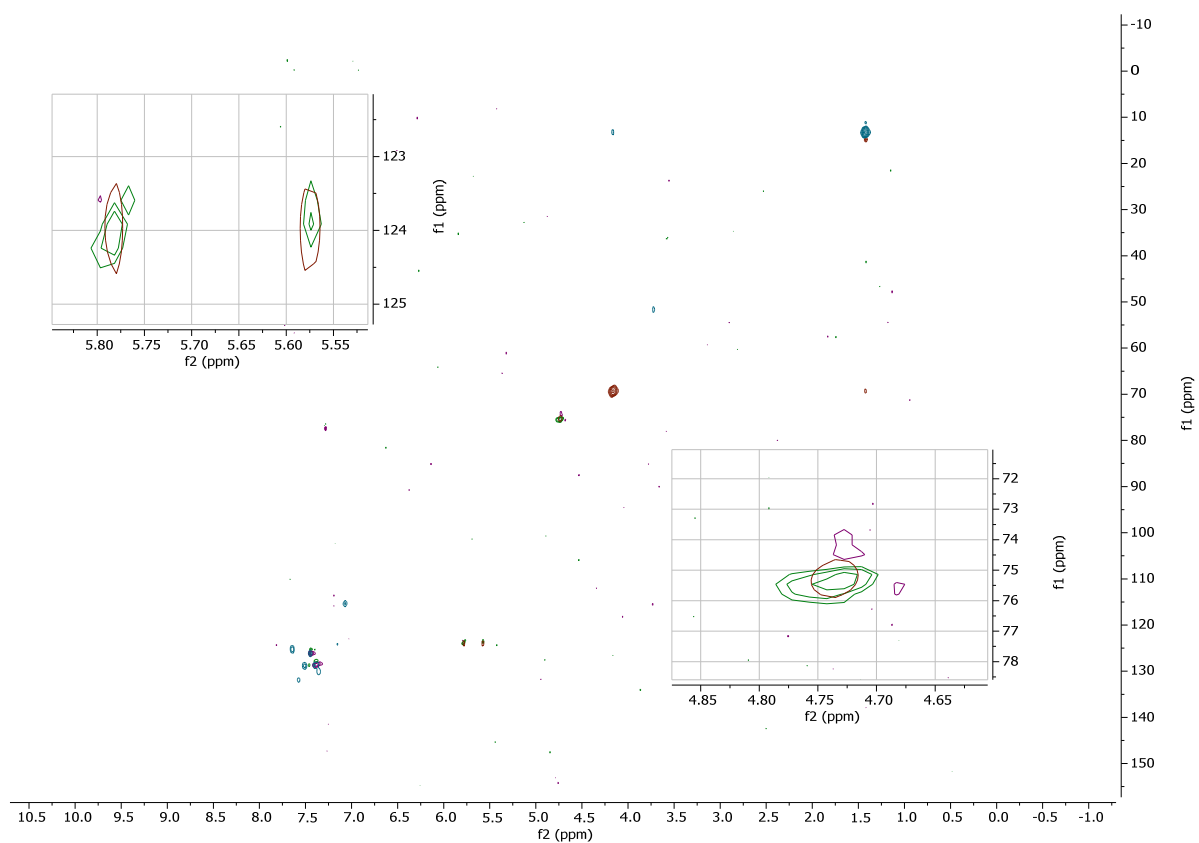

**Fig. S83**

Stacked  $^1\text{H}$ - $^{13}\text{C}$ -HSQC spectra of isolated pentafluoro-(2-phenylallyl)- $\lambda^6$ -sulfane (**30**) and the crude reaction mixture of the demethoxylation reaction of **8** in  $\text{CDCl}_3$ . The relevant  $\text{CH}_2\text{SF}_5$  group as well as the  $\text{C}=\text{CH}_2$  groups are highlighted. The mixture contains fluorobenzene and  $\alpha,\alpha,\alpha$ -trifluorotoluene which was added as standard to the reaction mixture.

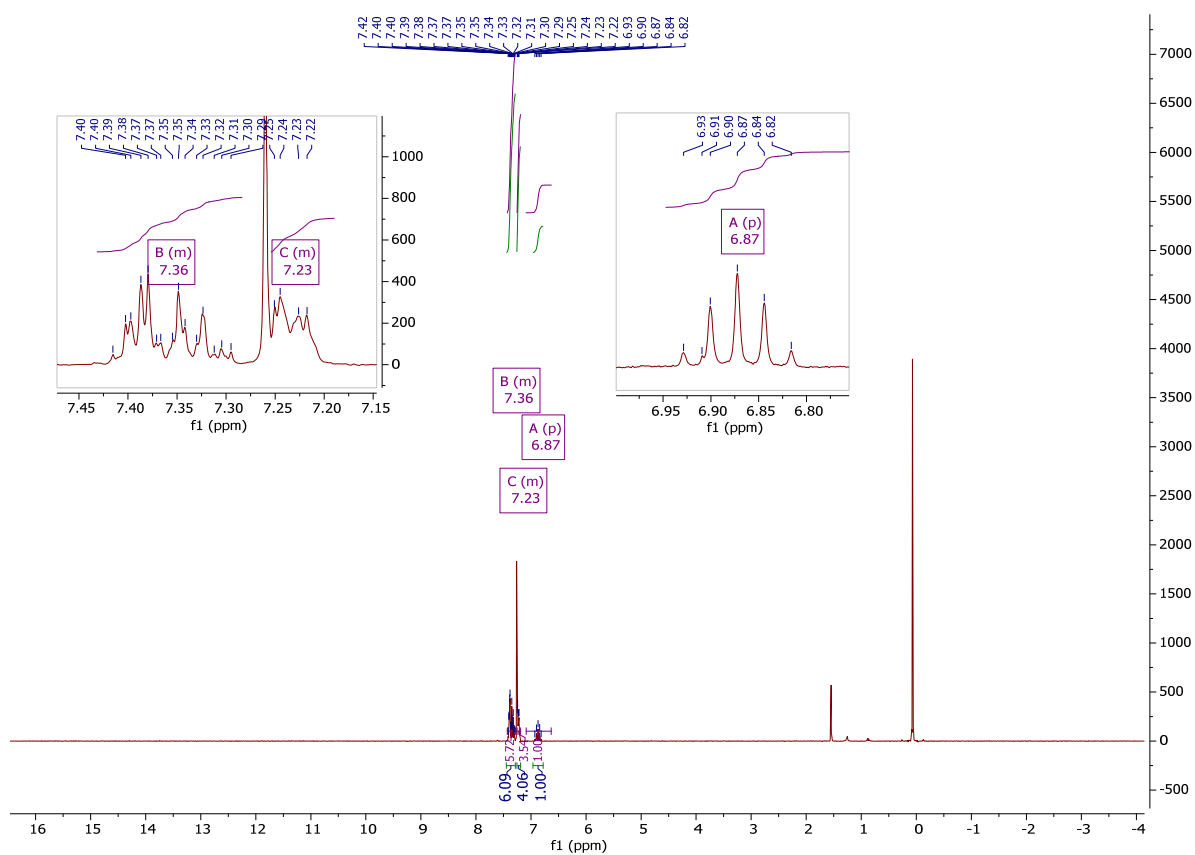

**Fig. S84**

$^1\text{H-NMR}$  spectrum of (2,2-Diphenylvinyl)-pentafluoro- $\lambda^6$ -sulfane (**31**) in  $\text{CDCl}_3$  as previously reported<sup>[S7]</sup>.

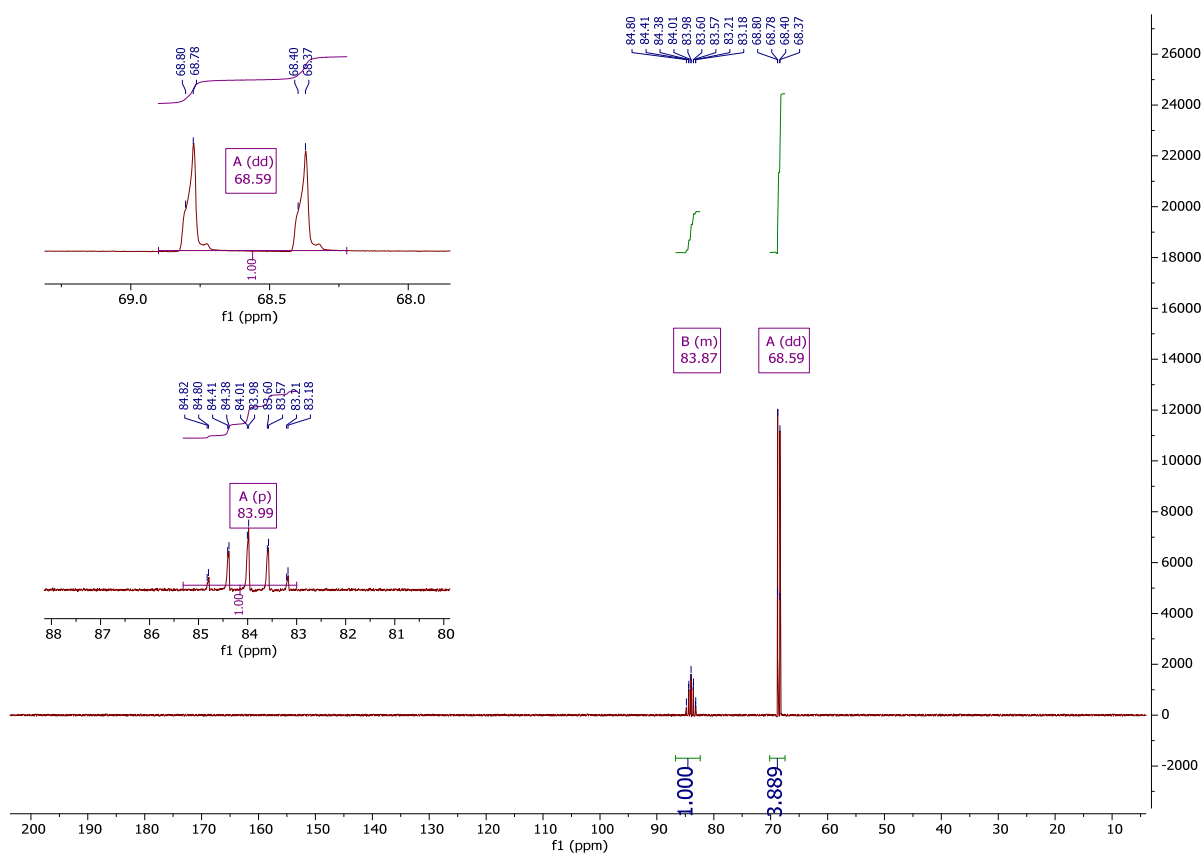

**Fig. S85**

$^{19}\text{F}$ -NMR spectrum of (2,2-Diphenylvinyl)-pentafluoro- $\lambda^6$ -sulfane (**31**) in  $\text{CDCl}_3$  as previously reported<sup>[S7]</sup>.

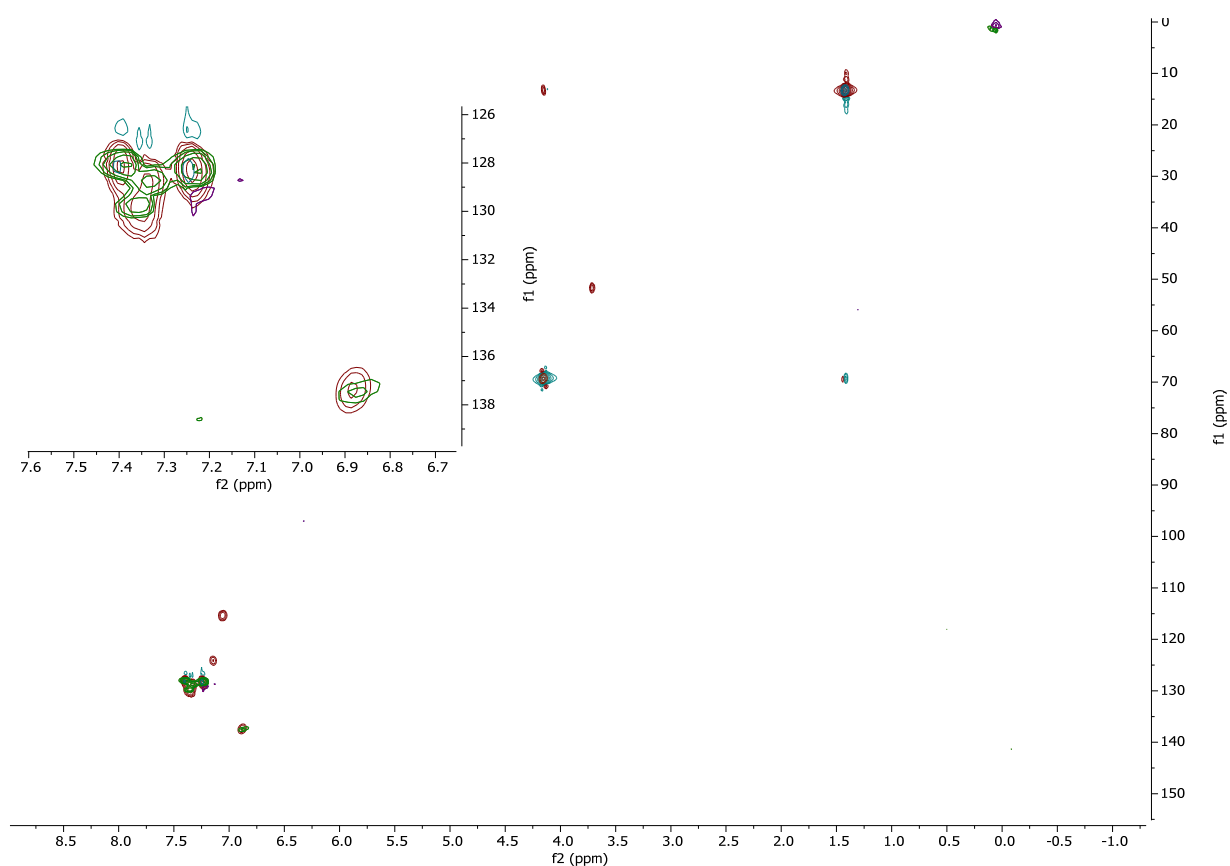

**Fig. S86**

Stacked <sup>1</sup>H-<sup>13</sup>C-HSQC spectra of isolated (2,2-Diphenylvinyl)-pentafluoro- $\lambda^6$ -sulfane (**31**) and the crude reaction mixture of the demethoxylation of **9** by BF<sub>3</sub> in CDCl<sub>3</sub>. The relevant =CHSF<sub>5</sub> group as well as the arene region is highlighted. The mixture contains fluorobenzene which was added as standard to the reaction mixture.



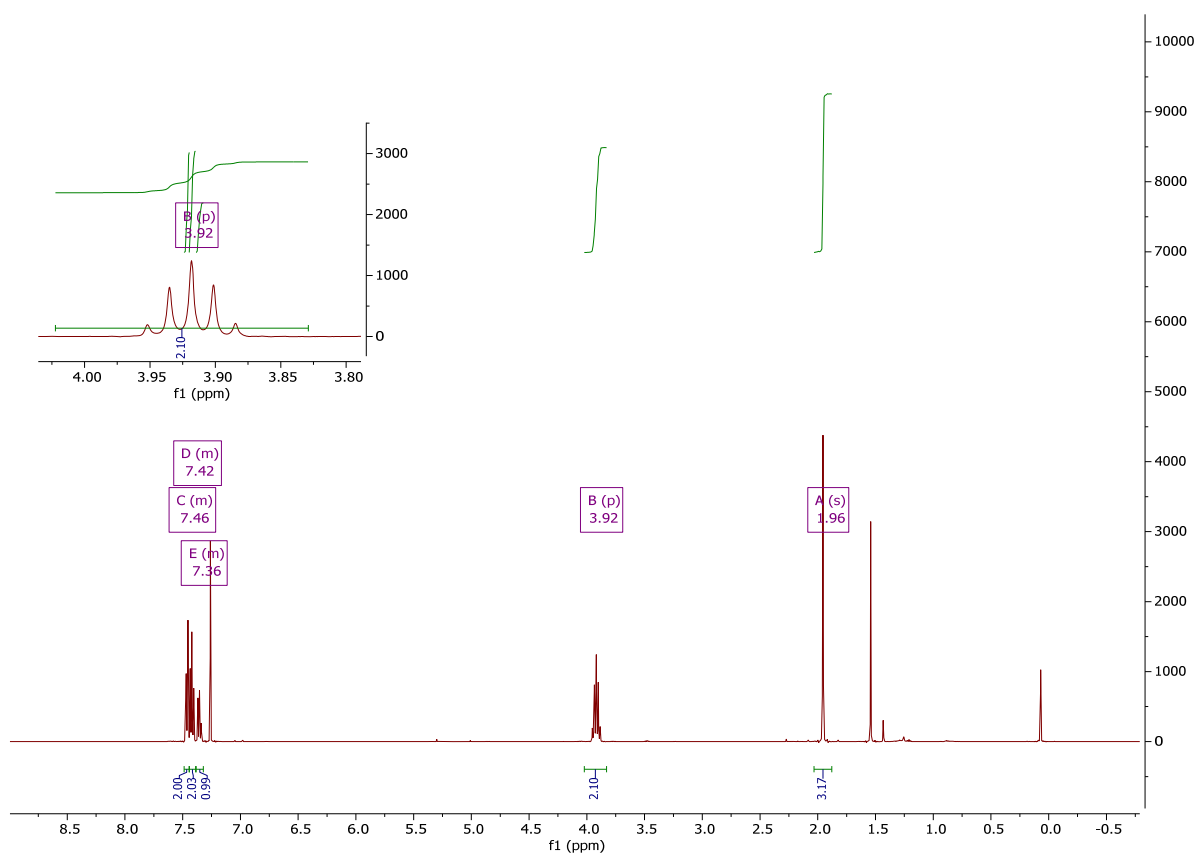

**Fig. S87**

<sup>1</sup>H-NMR spectrum of (2-azido-2-phenylpropyl)pentafluoro-λ<sup>6</sup>-sulfane (**32**) in CDCl<sub>3</sub>.

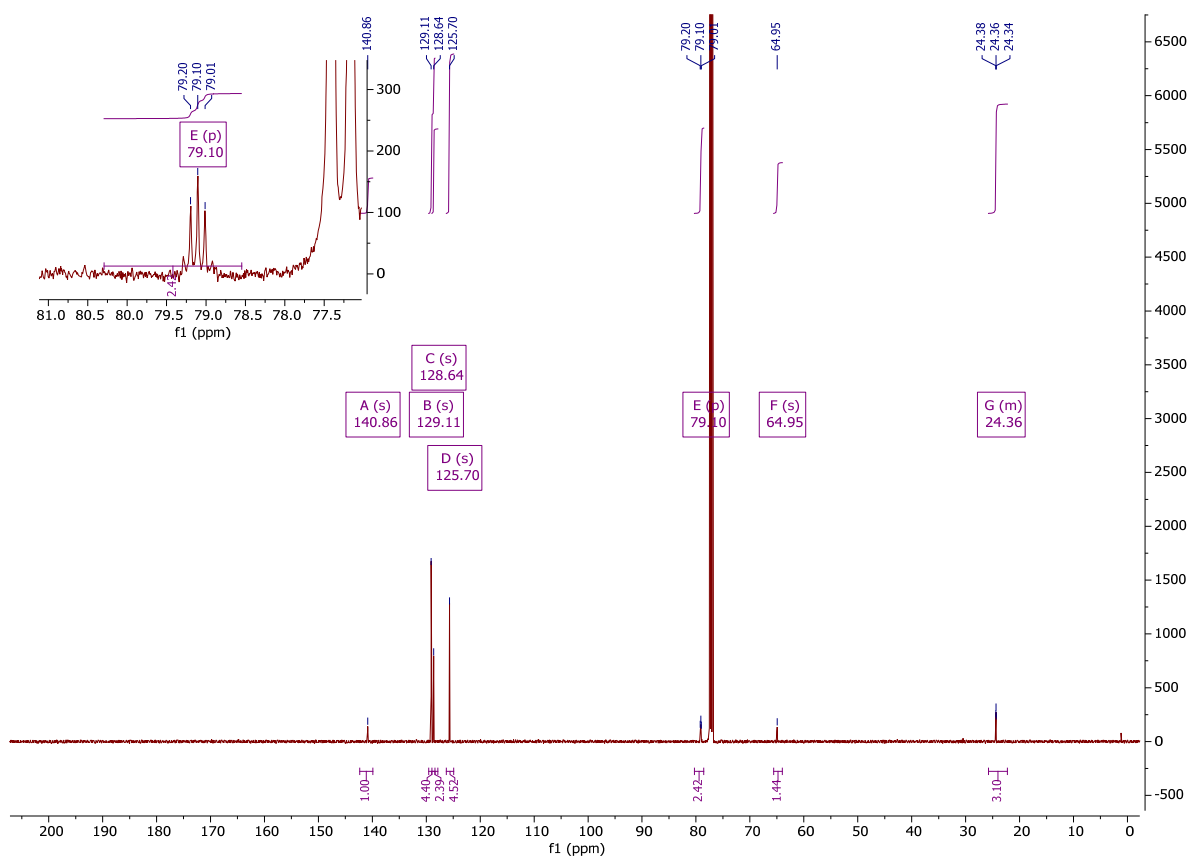

**Fig. S88**

$^{13}\text{C}$ -NMR spectrum of (2-azido-2-phenylpropyl)pentafluoro- $\lambda^6$ -sulfane (**32**) in  $\text{CDCl}_3$ .

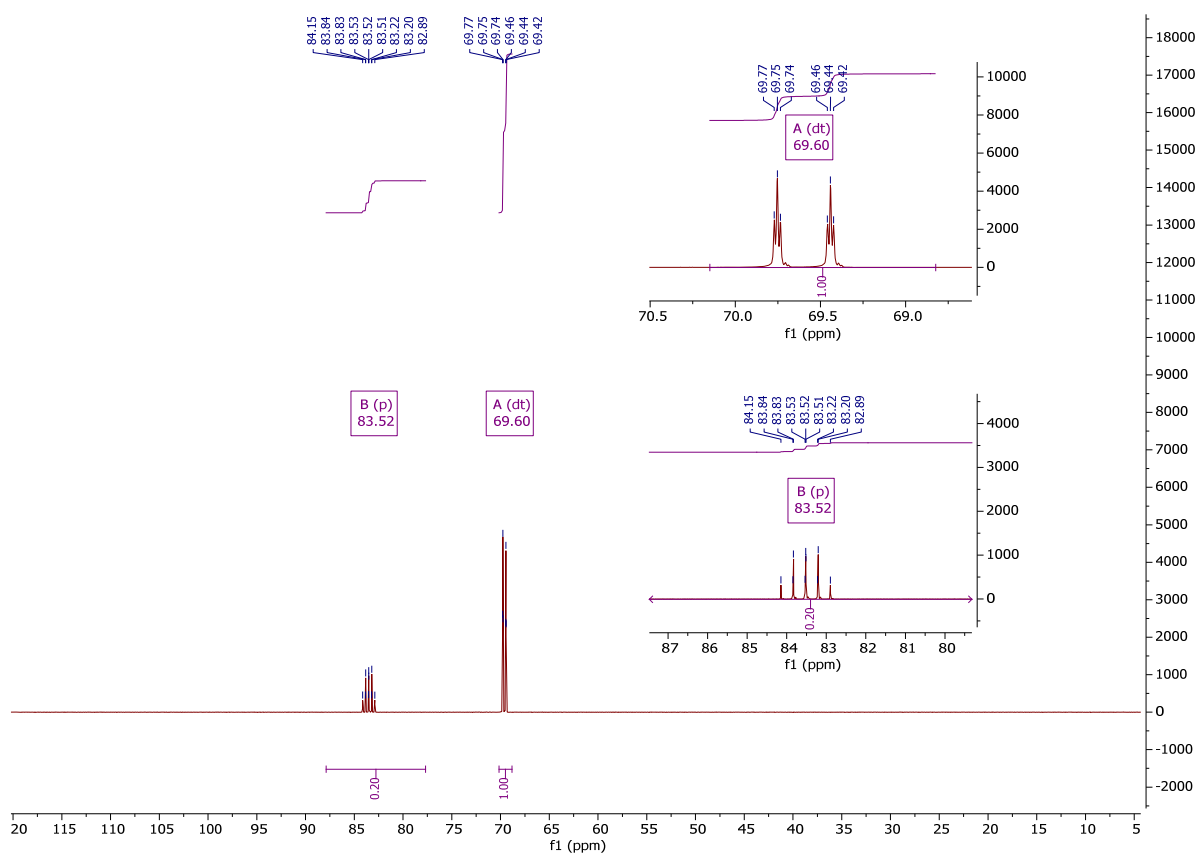

**Fig. S89**

$^{19}\text{F}$ -NMR spectrum of (2-azido-2-phenylpropyl)pentafluoro- $\lambda^6$ -sulfane (**32**) in  $\text{CDCl}_3$ .

## Mass spectrometric characterisations

MAT 95,+EI,Que 110,dir offen 7/22/2019 12:20:19 PM DR-834-2  
moe D. Rombach AK Wagenknecht  
dr8342 #6-8 RT: 0.52-0.69 AV: 3 NL: 3.92E6  
T: + c EI Full ms [ 49.50-450.50]

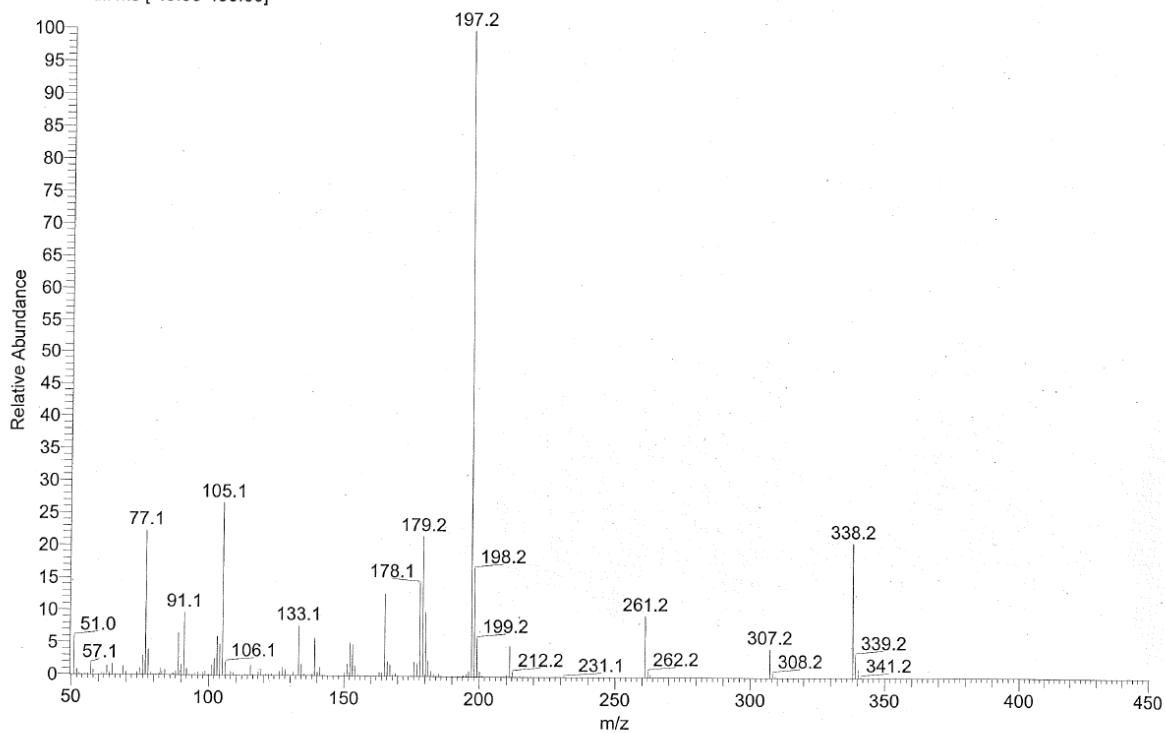

**Fig. S90**

HR-EI-MS spectrum of pentafluoro(2-methoxy-2,2-diphenylethyl)- $\lambda^6$ -sulfane (**9**).

dr8342-c9 #7 RT: 0.60 AV: 1 NL: 8.15E5  
T: + c EI Full ms [ 49.33-450.33]

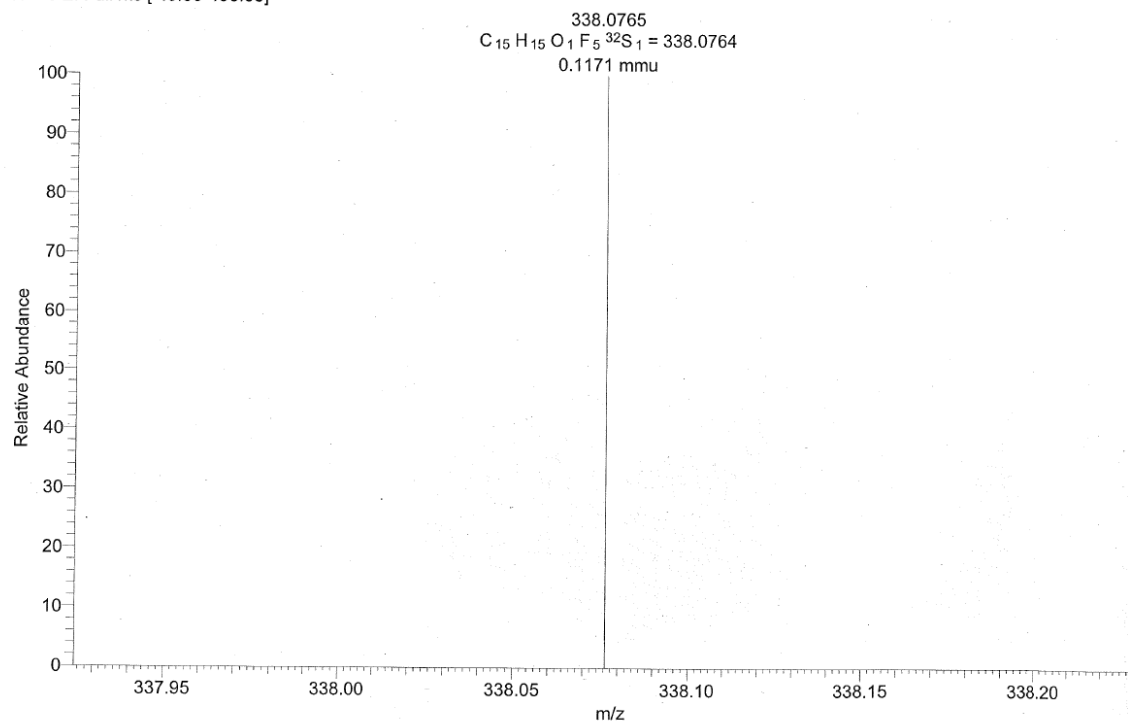

**Fig. S91**

HR-EI-MS spectrum of pentafluoro(2-methoxy-2,2-diphenylethyl)- $\lambda^6$ -sulfane (**9**).

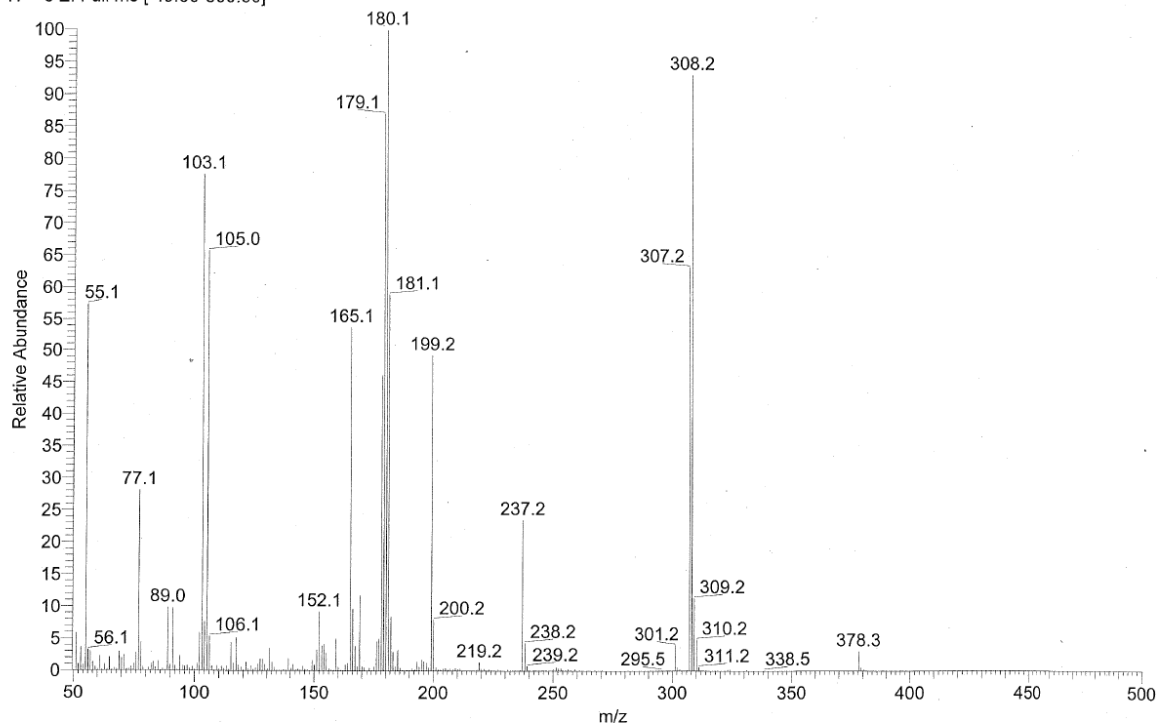

**Fig. S92**

EI-MS spectrum of pentafluoro(2-((2-methylallyl)oxy)-2,2-diphenylethyl)- $\lambda^6$ -sulfane (**10**).

MAT 95,+EI,Que 110,dir offen  
moe

7/22/2019 12:51:23 PM  
D. Rombach

DR-826-2  
AK Wagenknecht

dr8262 #1-3 RT: 0.18-0.35 AV: 3 NL: 1.51E5  
T: + c EI Full ms [ 49.50-500.50]

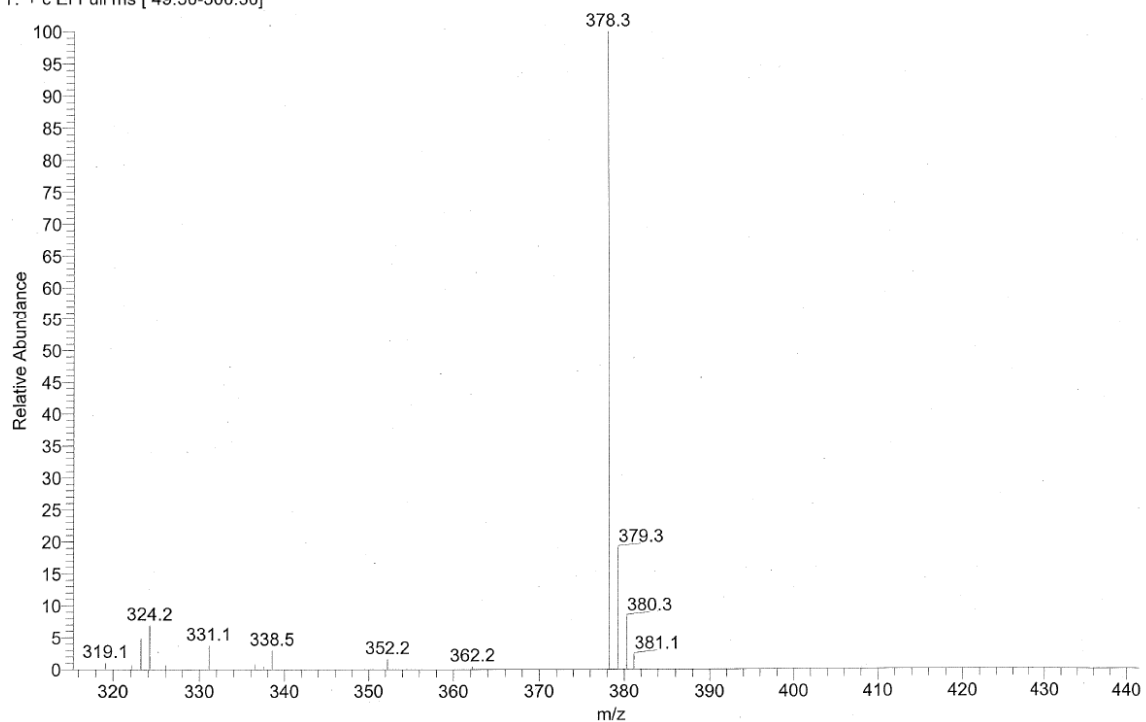

**Fig. S93**

HR-EI-MS spectrum of pentafluoro(2-((2-methylallyl)oxy)-2,2-diphenylethyl)- $\lambda^6$ -sulfane (10).

7/22/2019 12:56:43 PM

dr8262-c1 #21 RT: 1.91 AV: 1 NL: 1.08E5  
T: + c EI Full ms [ 49.50-500.50]

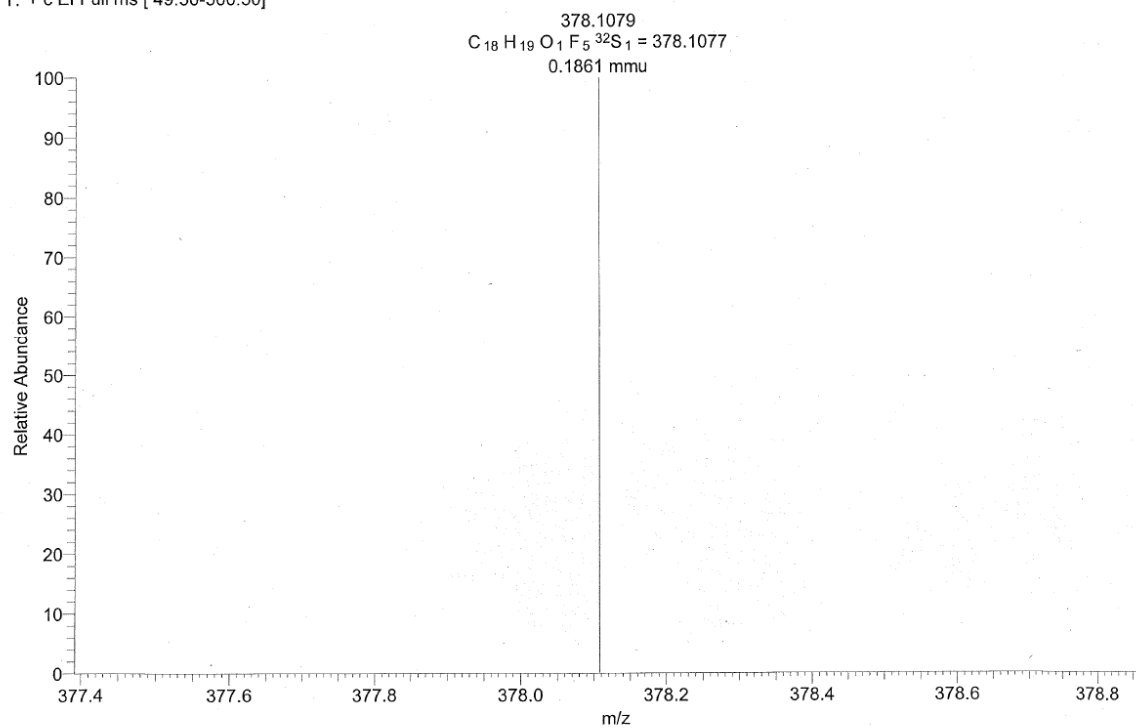

**Fig. S94**

HR-EI-MS spectrum of pentafluoro(2-((2-methylallyl)oxy)-2,2-diphenylethyl)- $\lambda^6$ -sulfane (10).



MAT 95,+EI,Que 110,dir offen 7/16/2018 12:29:27 PM DR-748-5PTLC2  
moe D. Rombach AK Wagenknecht  
dr7485ptlc2 #1-3 RT: 0.12-0.27 AV: 3 NL: 1.47E6  
T: + c EI Full ms [ 99.50-700.50]

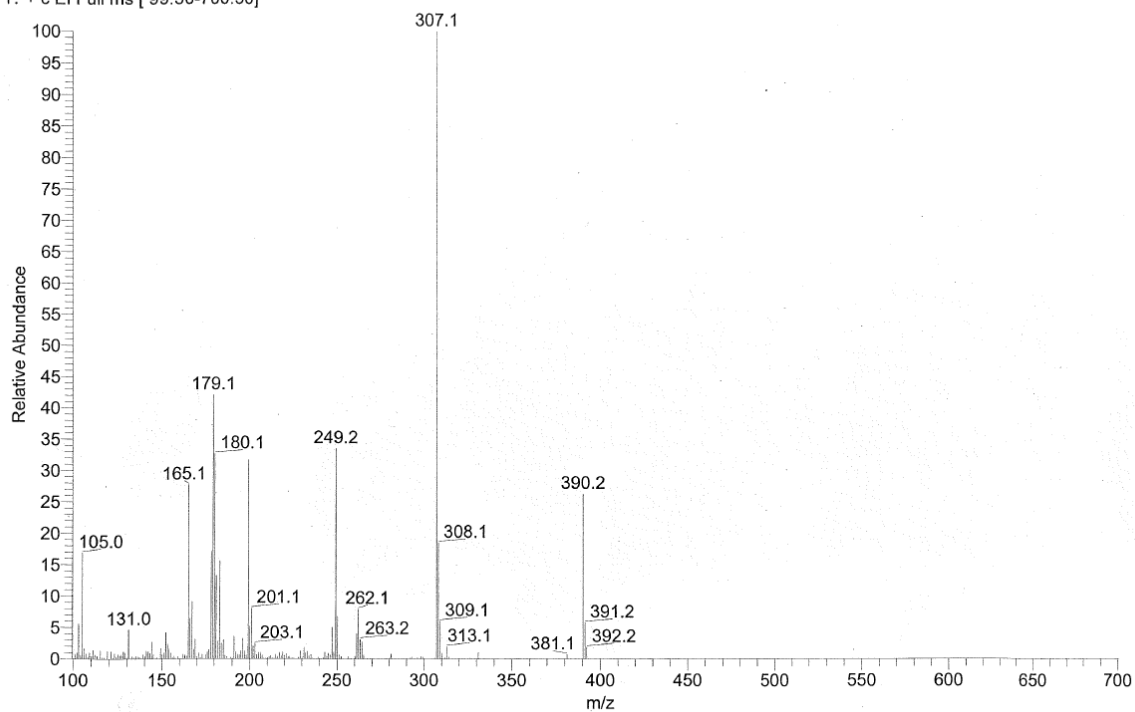

**Fig. S95**

EI-MS spectrum of pentafluoro(2-(pent-3-yn-1-yloxy)-2,2-diphenylethyl)- $\lambda^6$ -sulfane (**11**).

dr7485ptlc2-c3 #16 RT: 1.23 AV: 1 NL: 4.17E5  
T: + c EI Full ms [ 99.39-700.39]

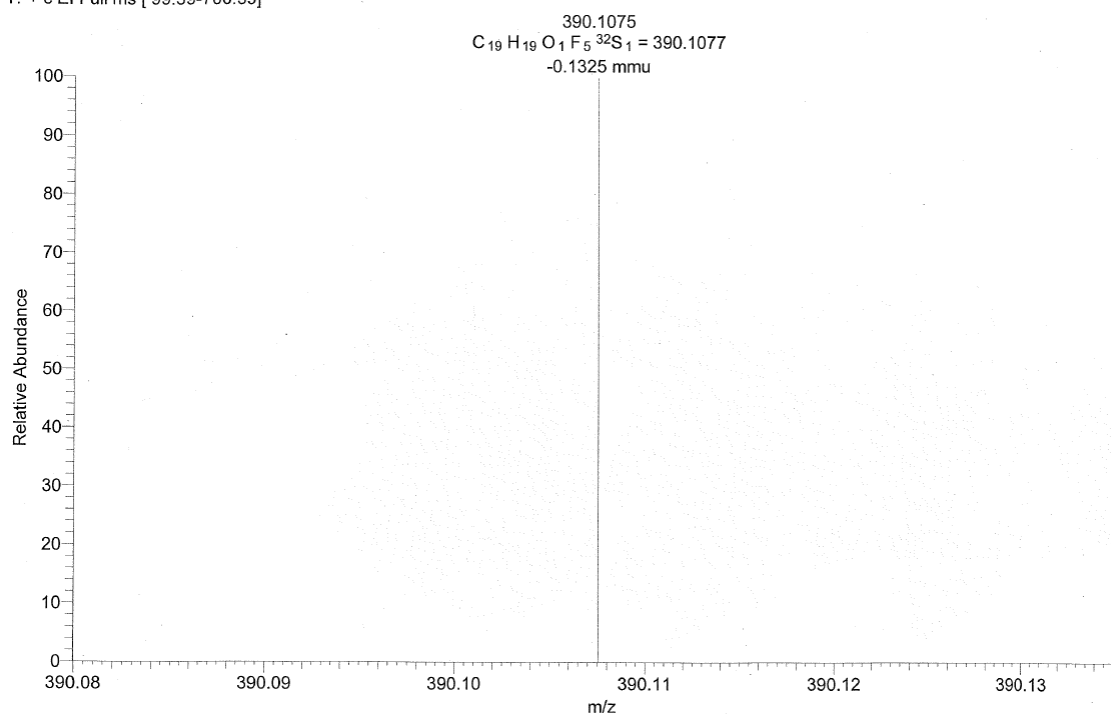

**Fig. S96**

HR-EI-MS spectrum of pentafluoro(2-(pent-3-yn-1-yloxy)-2,2-diphenylethyl)- $\lambda^6$ -sulfane (11).

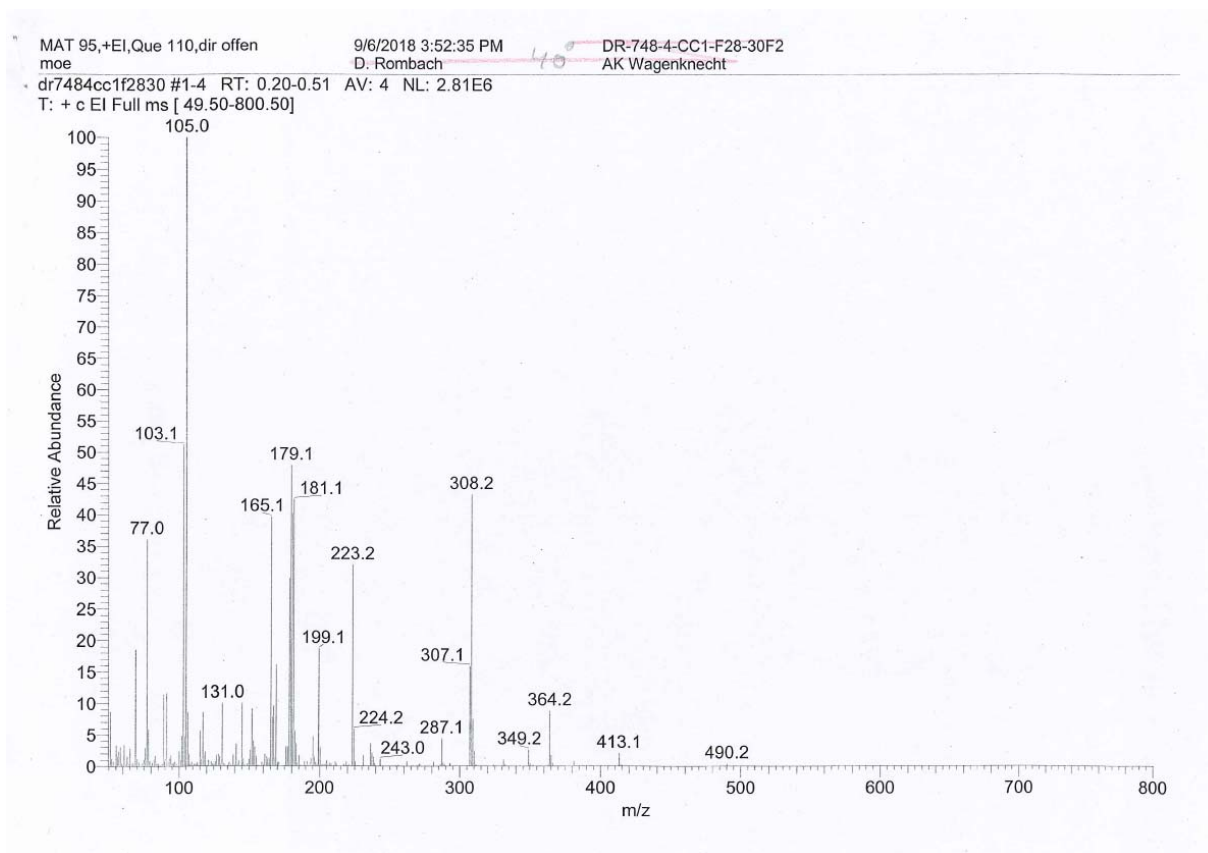

**Fig. S97**

EI-MS spectrum of (2-(allyloxy)-2,2-diphenylethyl)pentafluoro- $\lambda^6$ -sulfane (**12**).

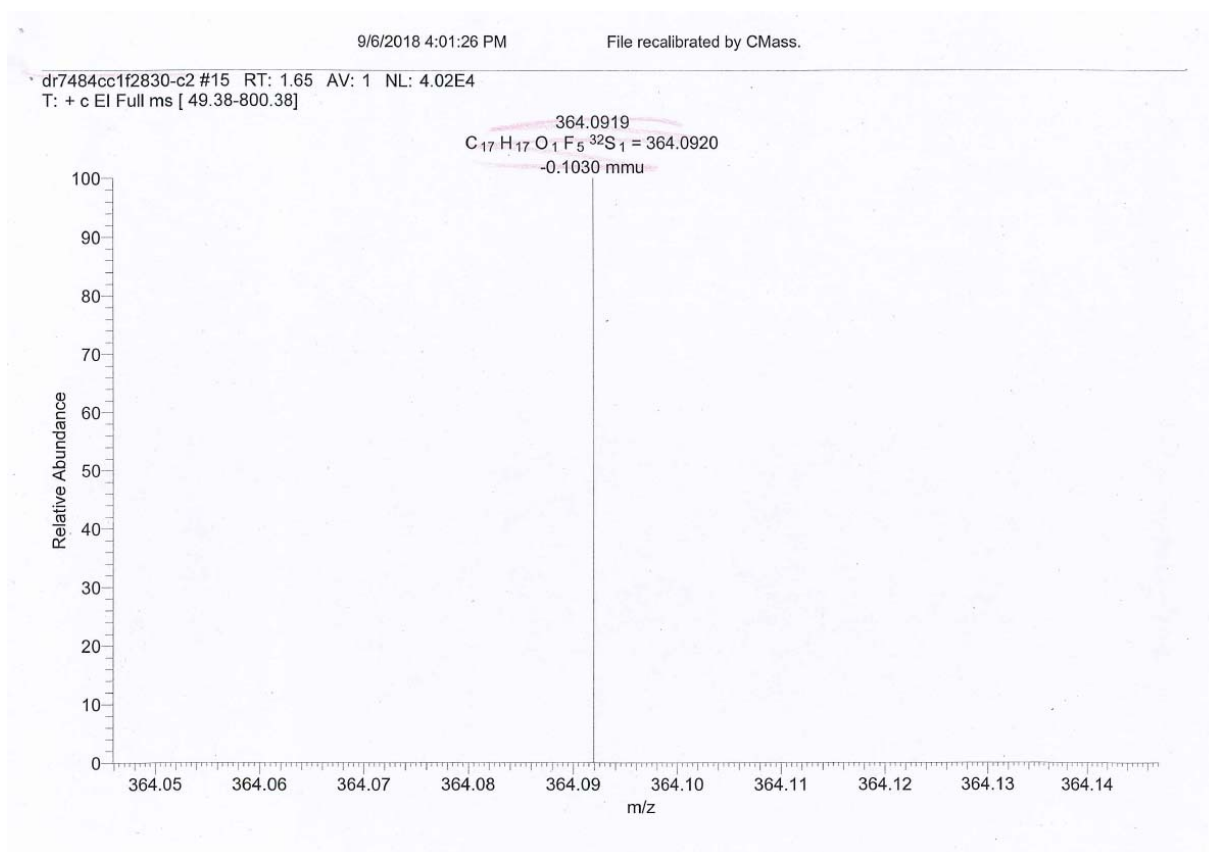

**Fig. S98**

HR-EI-MS spectrum of (2-(allyloxy)-2,2-diphenylethyl)pentafluoro- $\lambda^6$ -sulfane (**12**).

MAT 95,+EI,Que 110,dir offen 10/25/2018 12:20:43 PM DR 808-8-CC2  
moe D. Rombach 50 AK Wagenknecht  
dr8088cc2 #9-11 RT: 0.79-0.97 AV: 3 NL: 3.37E6  
T: + c EI Full ms [ 49.50-500.50]

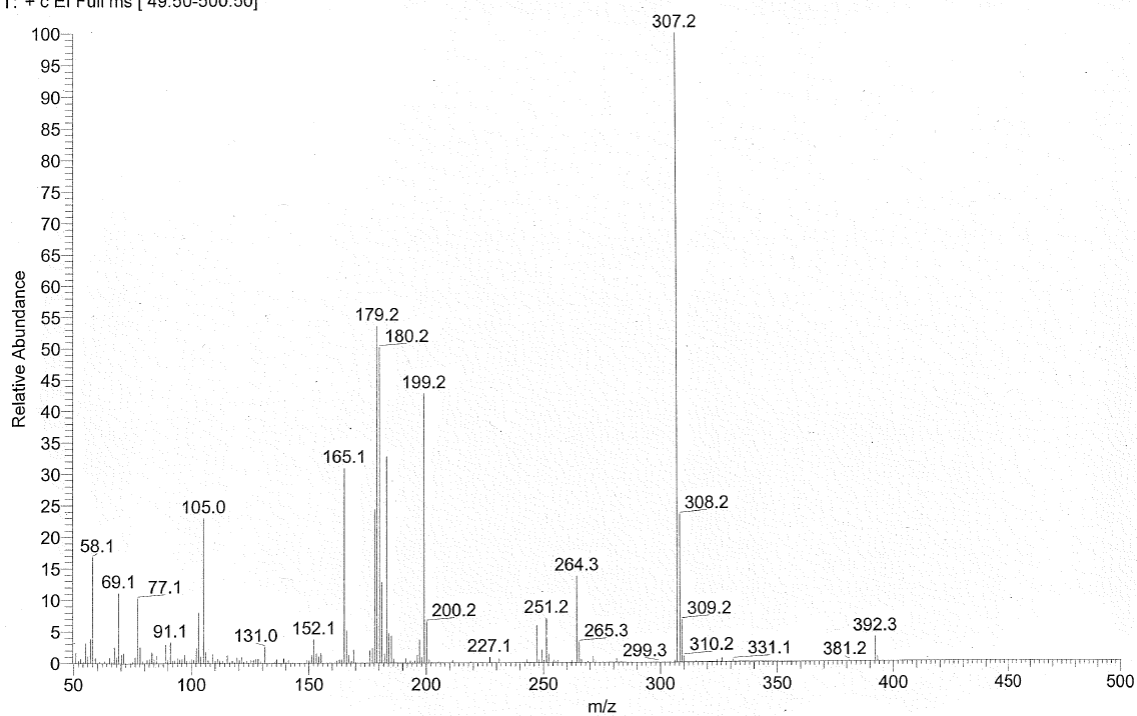

**Fig. S99**

EI-MS spectrum of (2-(cyclopentyloxy)-2,2-diphenylethyl)pentafluoro- $\lambda^6$ -sulfane (**13**).

MAT 95,+EI,Que 110,dir offen 10/25/2018 12:20:43 PM DR 808-8-CC2  
moe D. Rombach AK Wagenknecht  
dr8088cc2 #9-11 RT: 0.79-0.97 AV: 3 NL: 1.32E5  
T: + c EI Full ms [ 49.50-500.50]

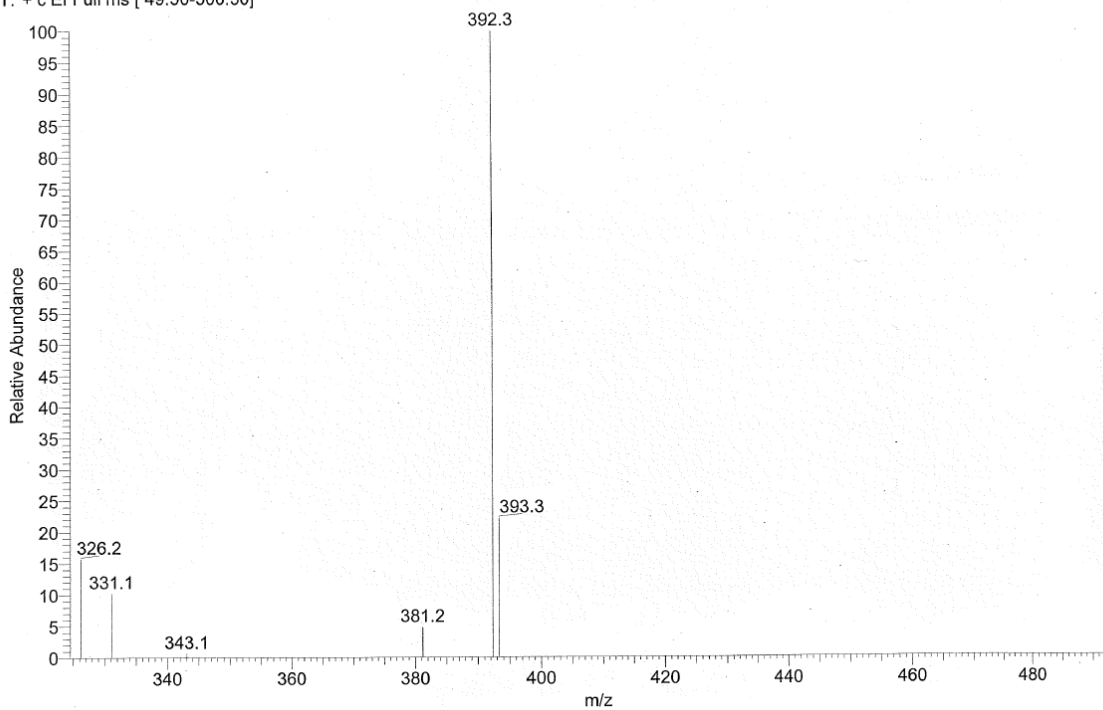

**Fig. S100**

EI-MS spectrum of (2-(cyclopentyloxy)-2,2-diphenylethyl)pentafluoro- $\lambda^6$ -sulfane (**13**).

dr8088cc2-c3 #9 RT: 0.79 AV: 1 NL: 1.17E5  
T: + c EI Full ms [ 49.33-500.33]

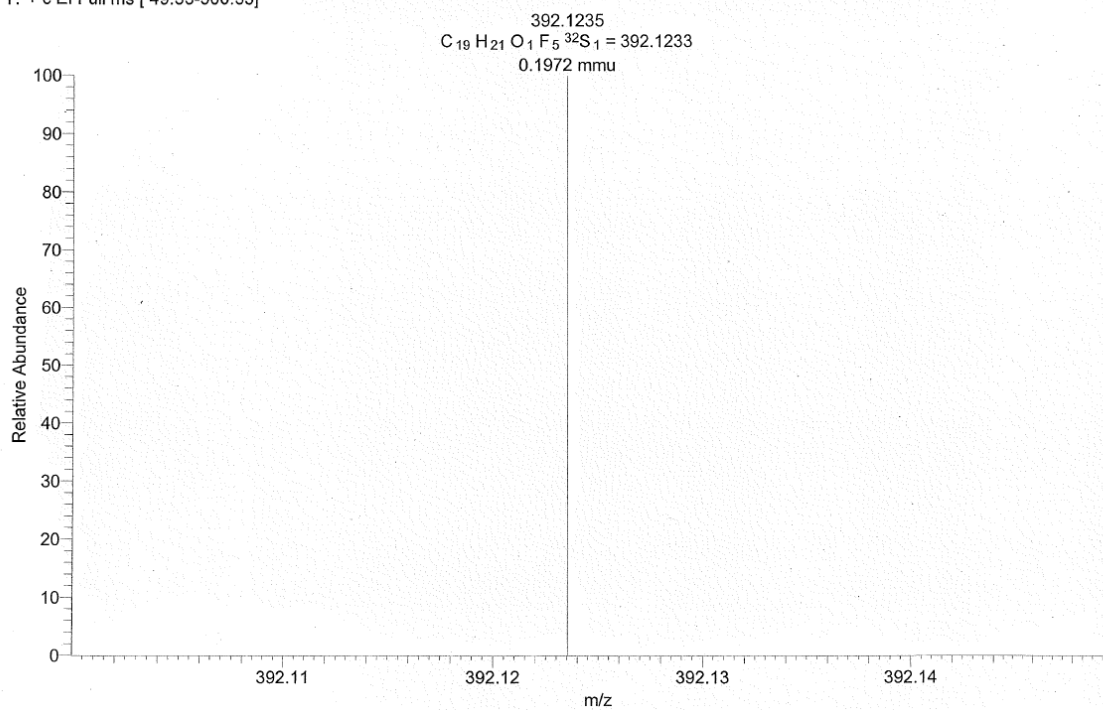

**Fig. S101**

HR-EI-MS spectrum of (2-(cyclopentyloxy)-2,2-diphenylethyl)pentafluoro- $\lambda^6$ -sulfane (13).

MAT 95,+EI,Que 110,dir offen  
7/22/2019 1:02:07 PM DR-825-1  
D. Rombach AK Wagenknecht  
dr8251 #2-4 RT: 0.23-0.40 AV: 3 NL: 1.40E6  
T: + c EI Full ms [ 49.50-500.50]

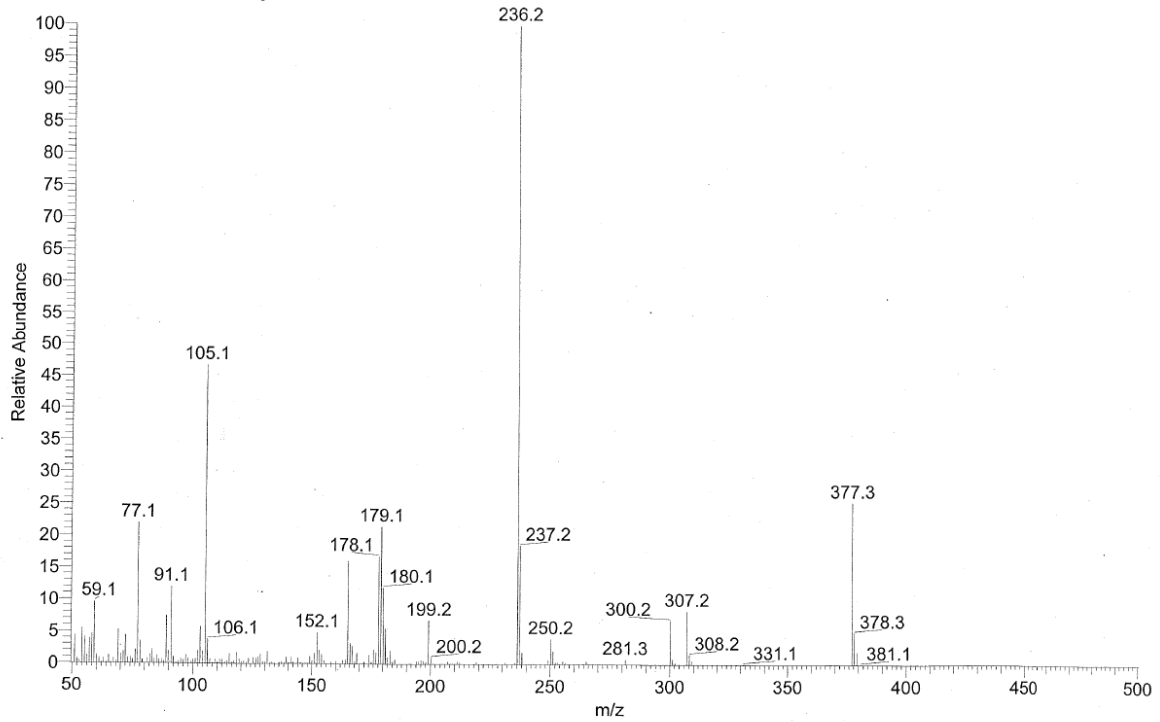

**Fig. S102**

EI-MS spectrum of 3-(2-(pentafluoro- $\lambda^6$ -sulfaneyl)-1,1-diphenylethoxy)propanenitrile (14).



dr8251-c2 #23 RT: 2.05 AV: 1 NL: 2.60E5  
T: + c EI Full ms [ 49.33-500.33]

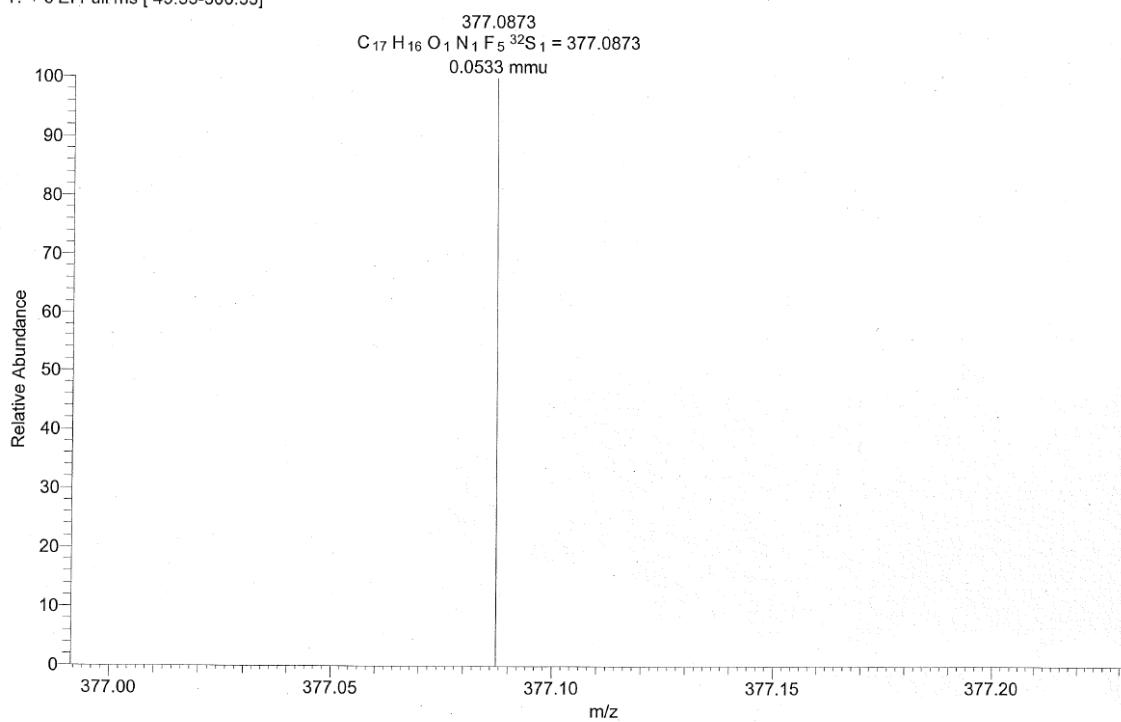

**Fig. S103**

HR-EI-MS spectrum of 3-(2-(pentafluoro- $\lambda^6$ -sulfaneyl)-1,1-diphenylethoxy)propanenitrile (14).

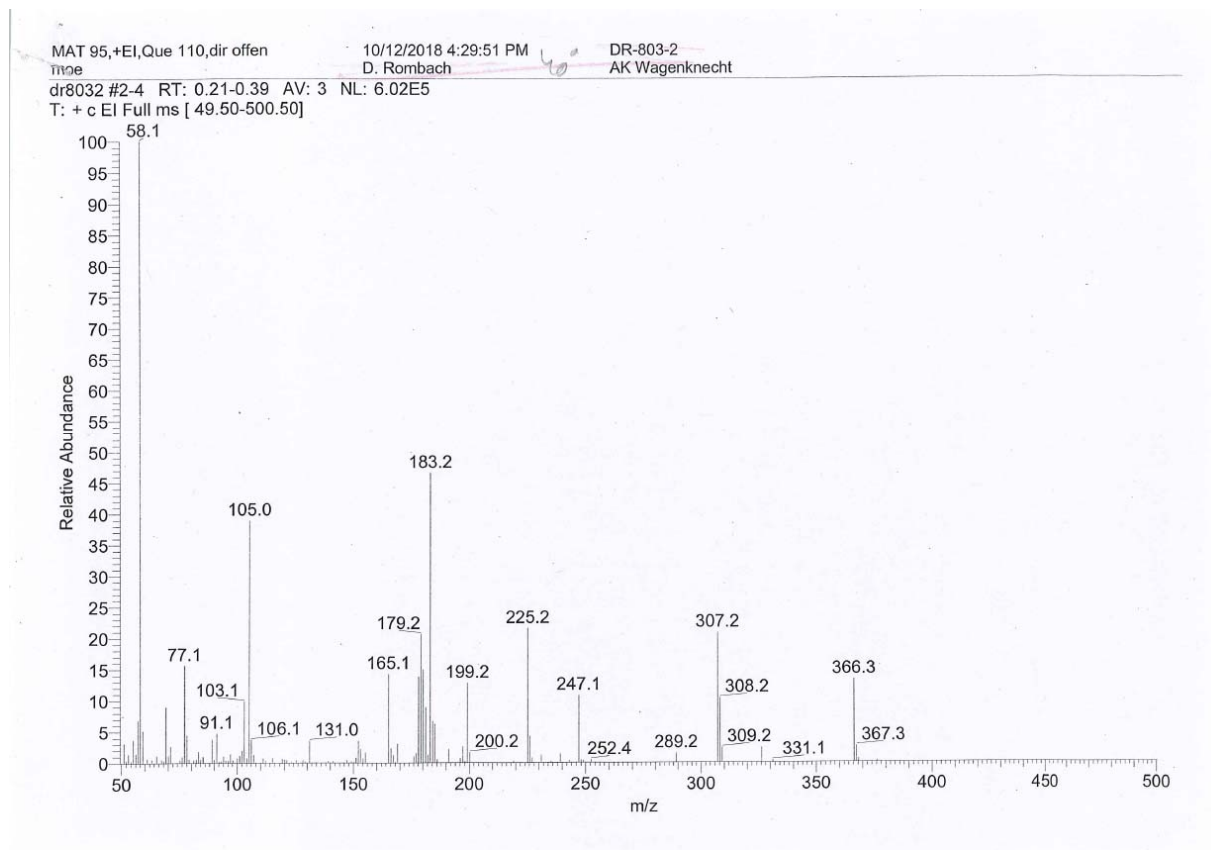

**Fig. S104**

EI-MS spectrum of pentafluoro(2-isopropoxy-2,2-diphenylethyl)- $\lambda^6$ -sulfane (**15**).

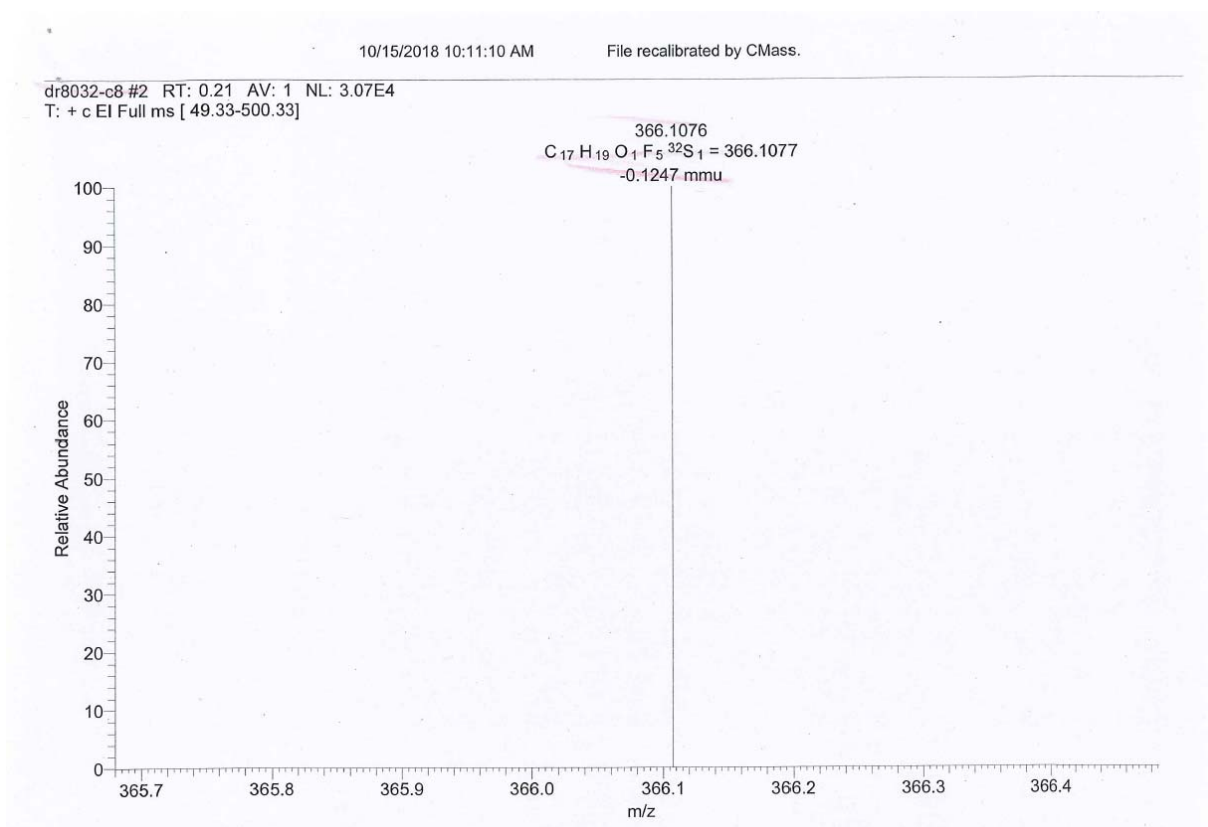

**Fig. S105**

HR-EI-MS spectrum of pentafluoro(2-isopropoxy-2,2-diphenylethyl)- $\lambda^6$ -sulfane (**15**).

MAT 95,+EI,Que 110,dir offen 8/22/2019 3:32:07 PM DR-830 linear-49  
moe D. Rombach 70° AK Wagenknecht  
dr830linear #3-8 RT: 0.32-0.78 AV: 6 NL: 5.36E6  
T: + c EI Full ms [ 49.50-600.50]

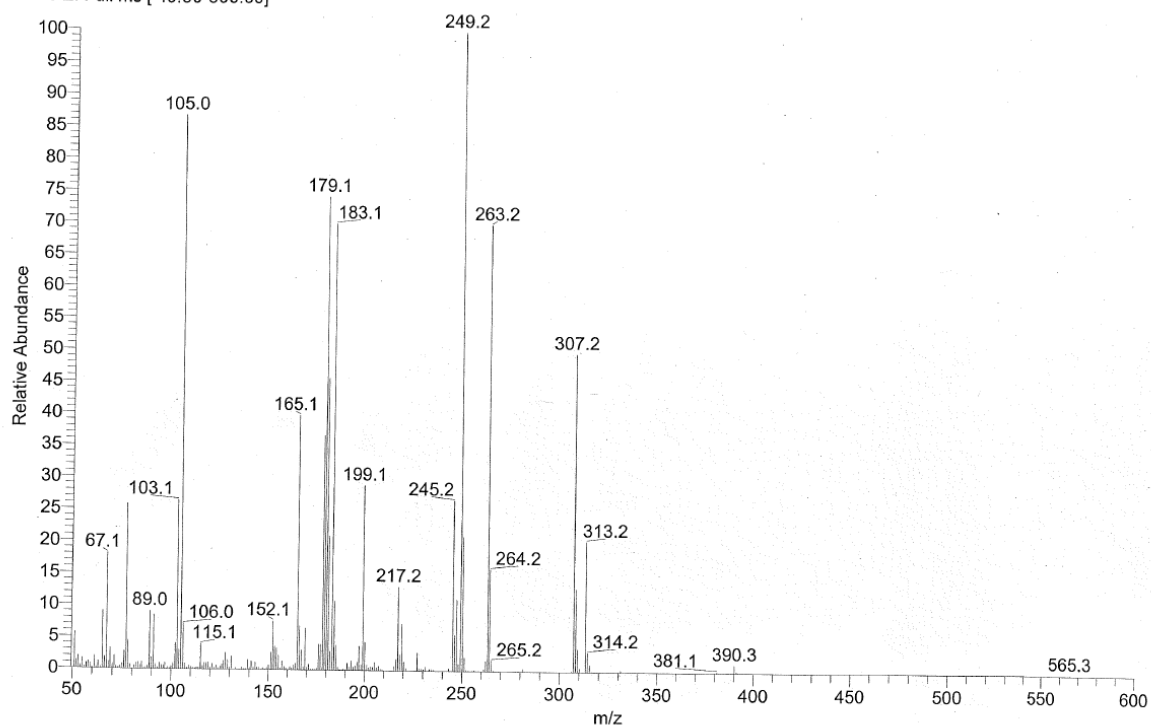

**Fig. S106**

EI-MS spectrum of pentafluoro(2-(pent-4-yn-1-yloxy)-2,2-diphenylethyl)- $\lambda^6$ -sulfane (**16**).

MAT 95,+EI,Que 110,dir offen 8/22/2019 3:32:07 PM DR-830 linear-49  
moe D. Rombach AK Wagenknecht  
dr830linear #3-8 RT: 0.32-0.78 AV: 6 NL: 6.65E4  
T: + c EI Full ms [ 49.50-600.50]

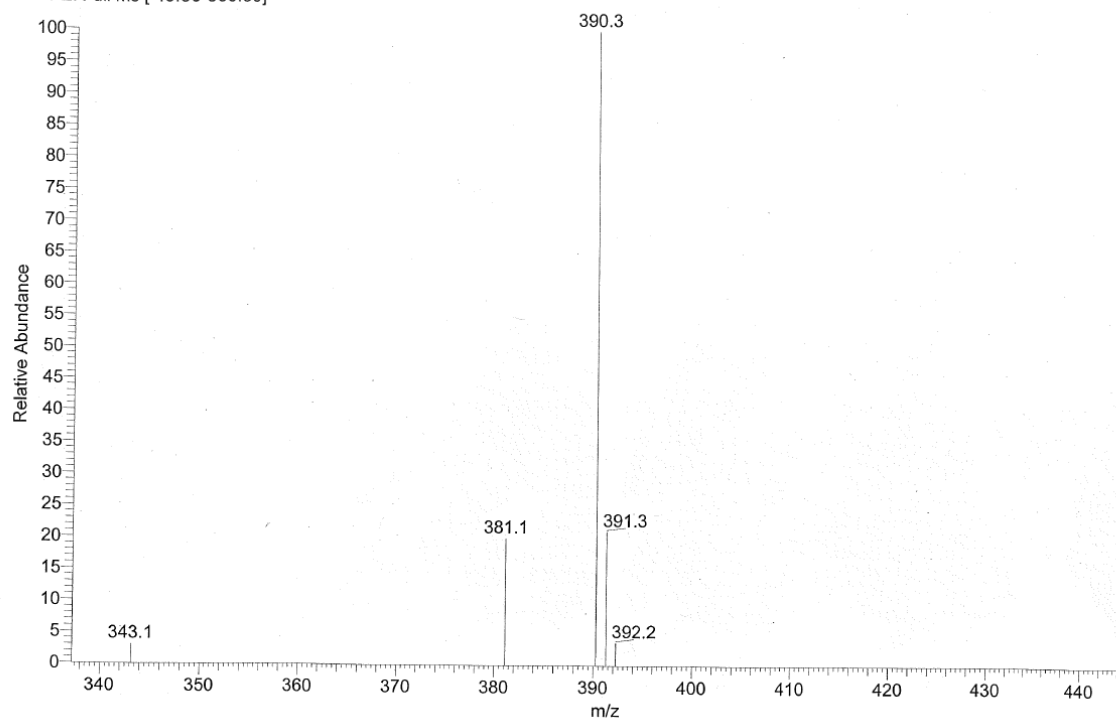

**Fig. S107**

EI-MS spectrum of pentafluoro(2-(pent-4-yn-1-yloxy)-2,2-diphenylethyl)- $\lambda^6$ -sulfane (**16**).

dr830linear-c2 #4 RT: 0.41 AV: 1 NL: 1.11E5  
T: + c EI Full ms [ 49.34-600.34]

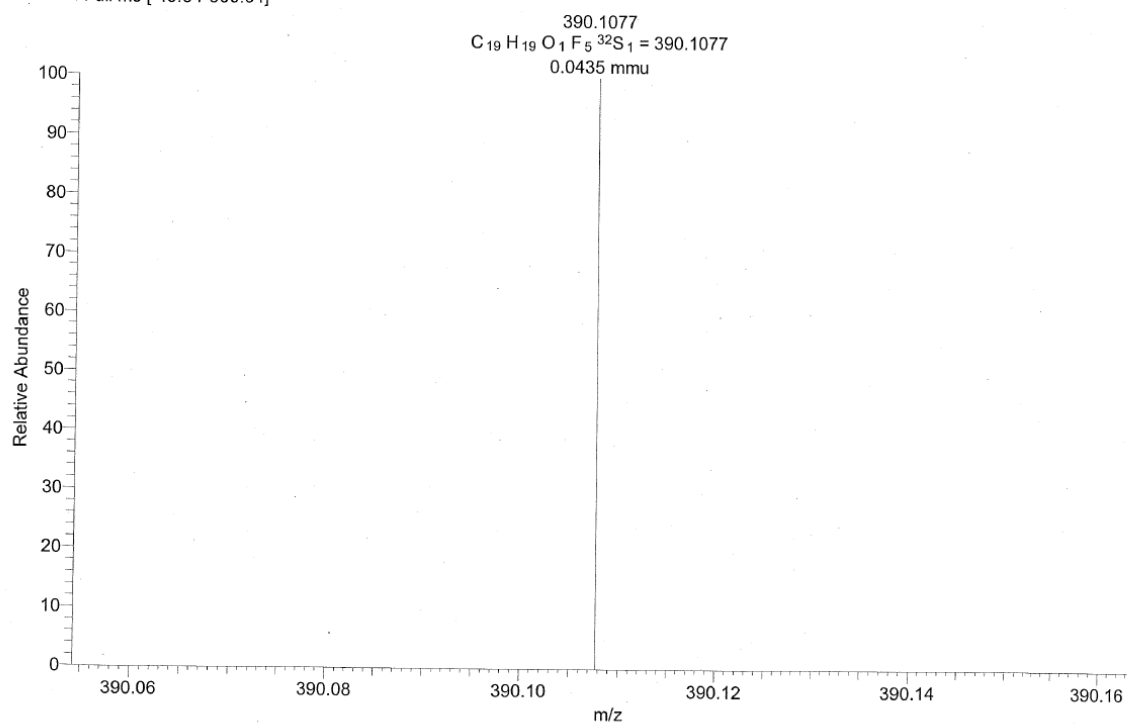

**Fig. S108**

HR-EI-MS spectrum of pentafluoro(2-(pent-4-yn-1-yloxy)-2,2-diphenylethyl)- $\lambda^6$ -sulfane (16).

MAT 95,+EI,Que 110,dir offen 7/23/2019 10:56:16 AM DR-831-12-F2-F19-23  
moe D. Rombach 20 AK Wagenknecht  
dr83112f1923 #12-14 RT: 1.09-1.26 AV: 3 NL: 4.13E6  
T: + c EI Full ms [ 49.50-500.50]

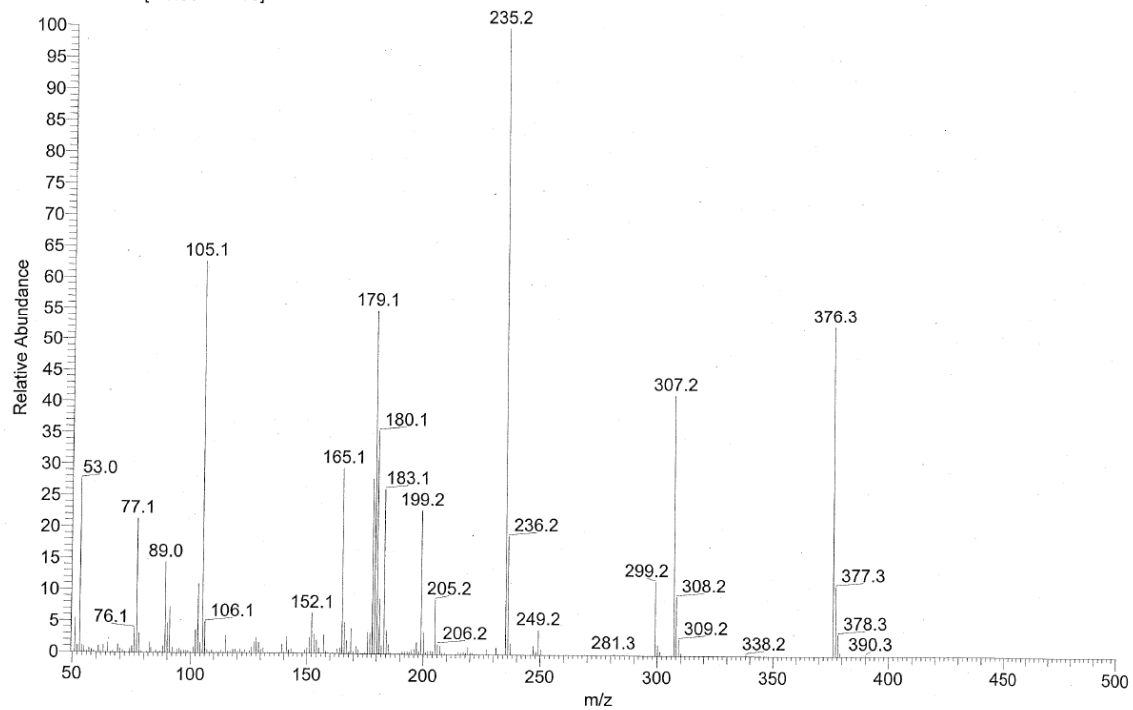

**Fig. S109**

EI-MS spectrum of (2-(but-3-yn-1-yloxy)-2,2-diphenylethyl)pentafluoro- $\lambda^6$ -sulfane (**17**).

dr83112f1923-c4 #18 RT: 1.61 AV: 1 NL: 6.01E5  
T: + c EI Full ms [ 49.32-500.32]

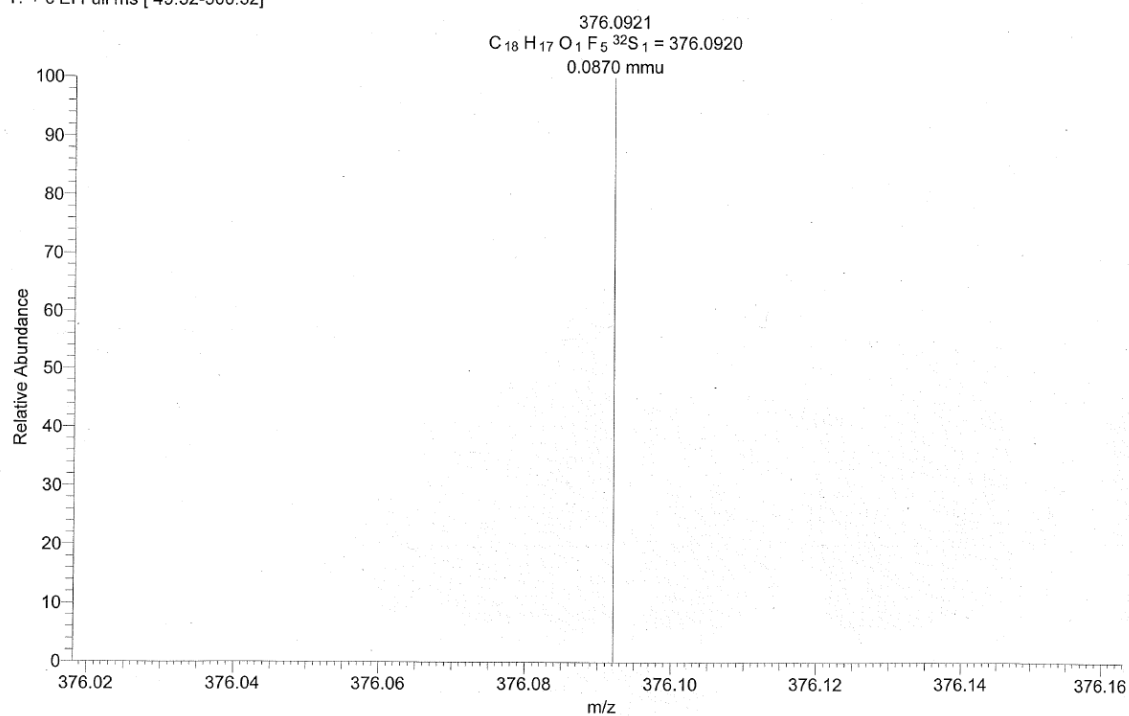

**Fig. S110**

HR-EI-MS spectrum of (2-(but-3-yn-1-yloxy)-2,2-diphenylethyl)pentafluoro- $\lambda^6$ -sulfane (17).



MAT 95,+EI,Que 110,dir offen  
moe

7/23/2019 9:53:49 AM  
D. Rombach

DR-8214-CC2-F15-20  
AK Wagenknecht

dr8214 #4-6 RT: 0.38-0.55 AV: 3 NL: 3.30E6  
T: + c EI Full ms [ 49.50-500.50]

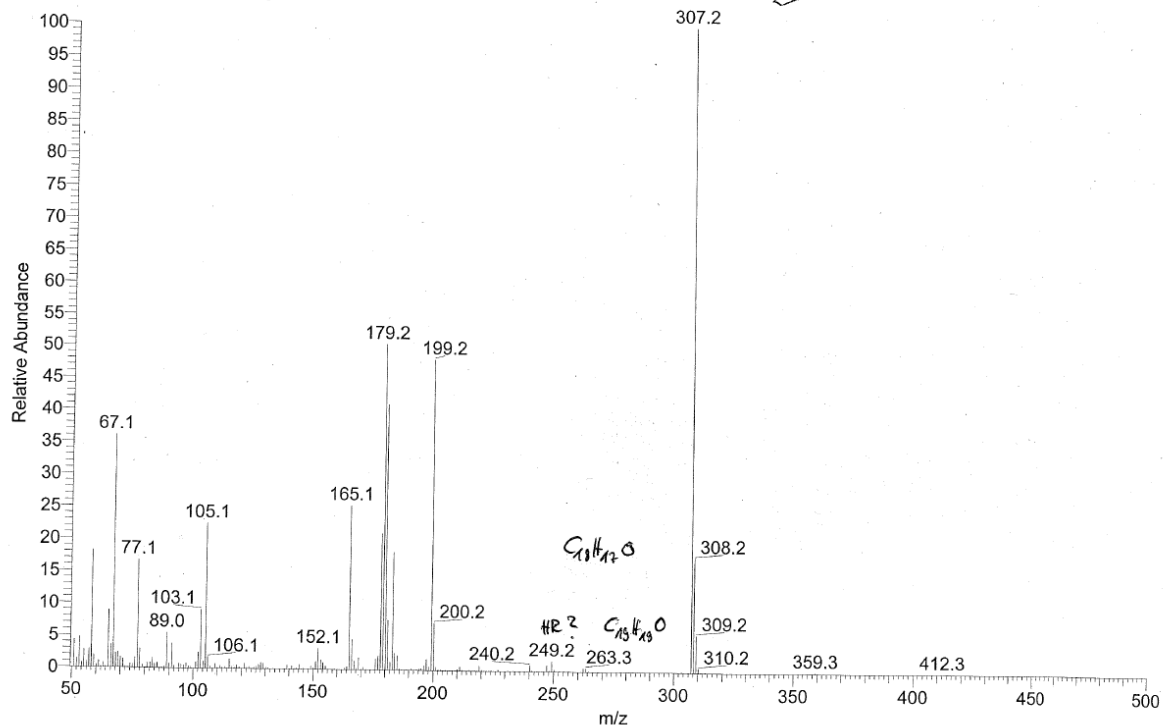

**Fig. S111**

EI-MS spectrum of pentafluoro(2-(penta-3,4-dien-1-yloxy)-2,2-diphenylethyl)- $\lambda^6$ -sulfane (18).

dr8214 #4-6 RT: 0.38-0.55 AV: 3 NL: 5.01E3  
T: + c EI Full ms [ 49.50-500.50]

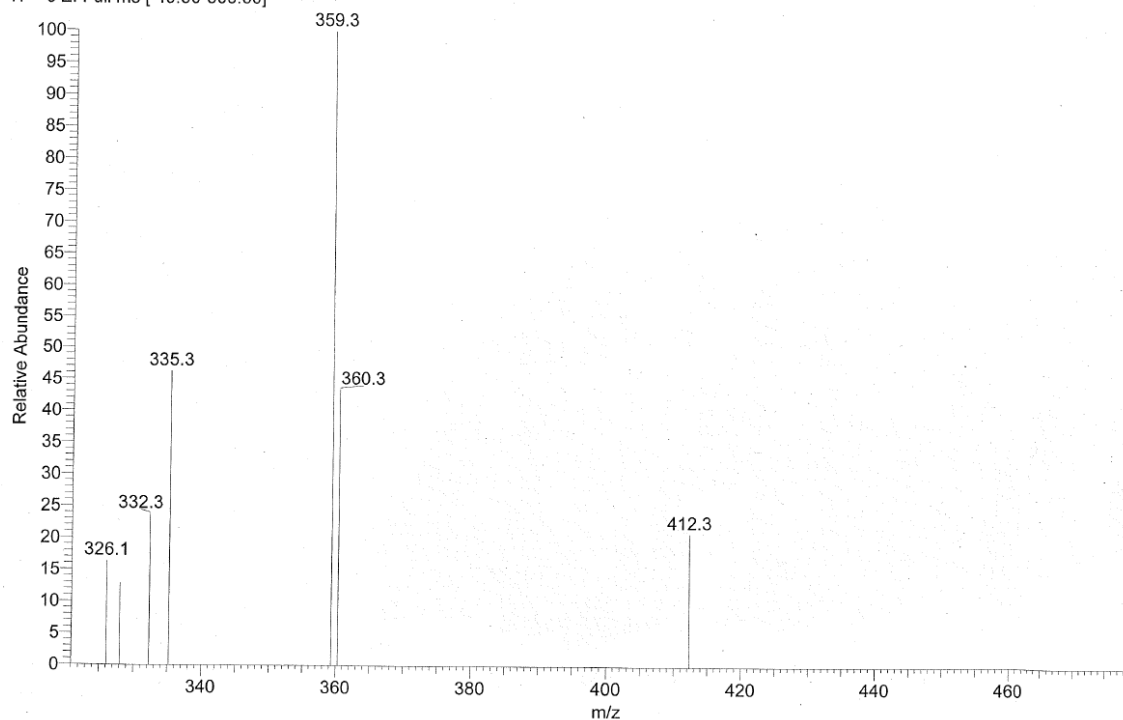

**Fig. S112**

EI-MS spectrum of pentafluoro(2-(penta-3,4-dien-1-yloxy)-2,2-diphenylethyl)- $\lambda^6$ -sulfane (18).

dr8214-c6 #3 RT: 0.29 AV: 1 NL: 8.81E3  
T: + c EI Full ms [ 49.41-500.41]

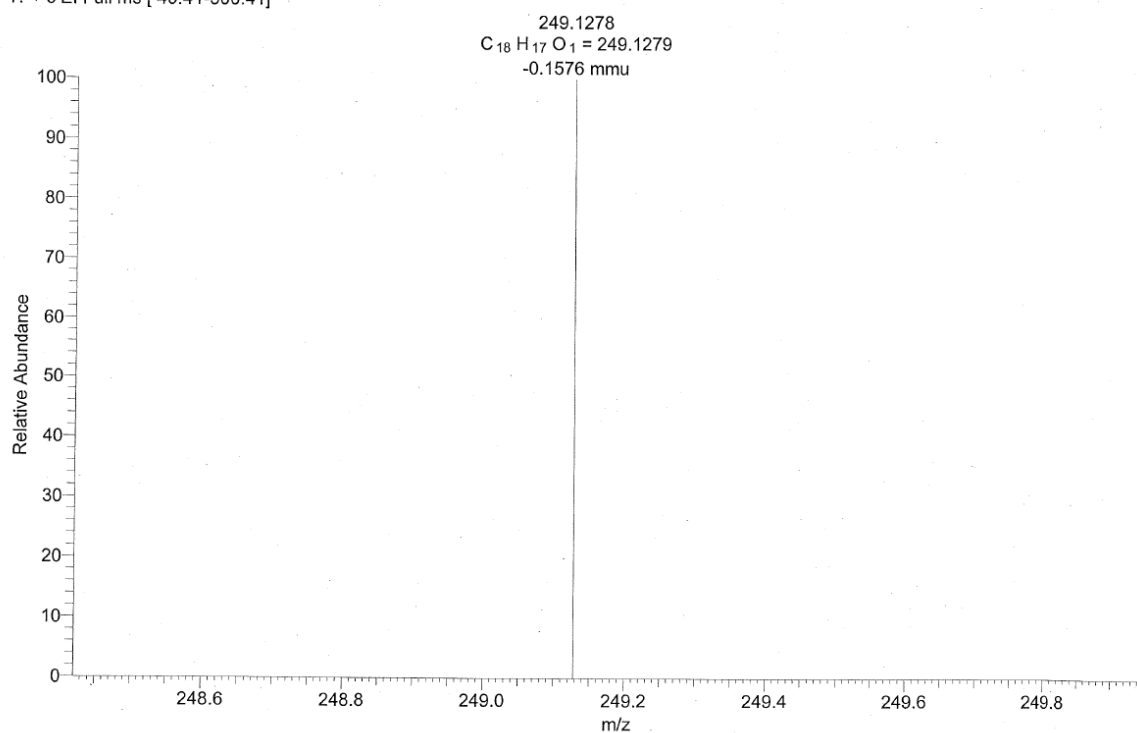

**Fig. S113**

HR-EI-MS spectrum of pentafluoro(2-(penta-3,4-dien-1-yloxy)-2,2-diphenylethyl)- $\lambda^6$ -sulfane (**18**).

dr8214-c9 #4 RT: 0.38 AV: 1 NL: 1.64E4  
T: + c EI Full ms [ 49.39-500.39]

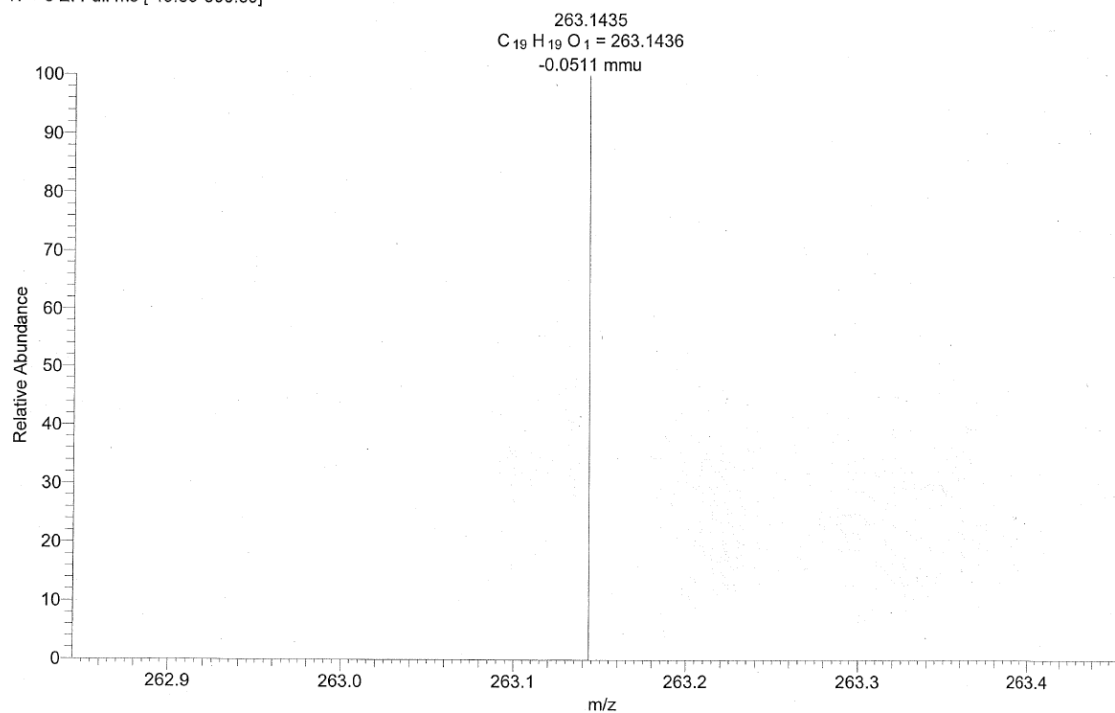

**Fig. S114**

HR-EI-MS spectrum of pentafluoro(2-(penta-3,4-dien-1-yloxy)-2,2-diphenylethyl)- $\lambda^6$ -sulfane (**18**).

MAT 95,+EI,Que 110,dir offen 7/22/2019 12:00:49 PM DR-834-1  
moe D. Rombach AK Wagenknecht  
dr8341 #5-7 RT: 0.43-0.59 AV: 3 NL: 5.53E6  
T: + c EI Full ms [ 49.50-400.50]

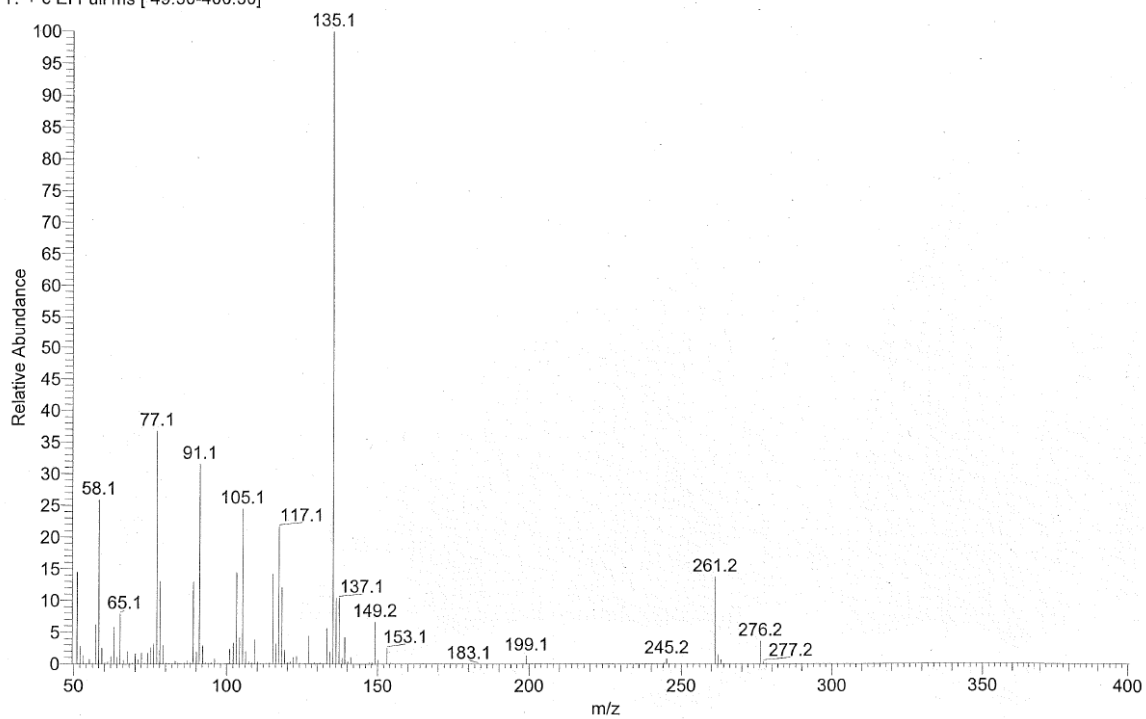

**Fig. S115**

HR-EI-MS spectrum of pentafluoro(2-methoxy-2-phenylpropyl)- $\lambda^6$ -sulfane (**8**).

dr8341-c4 #8 RT: 0.66 AV: 1 NL: 9.09E3  
T: + c EI Full ms [ 49.36-400.36]

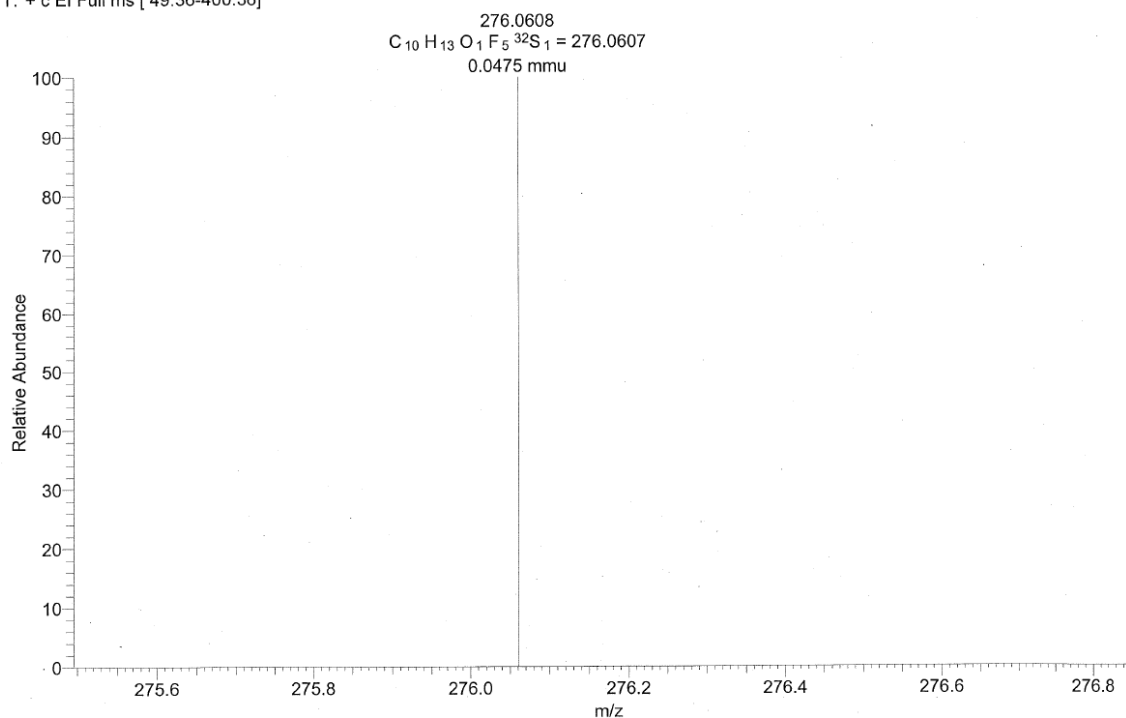

**Fig. S116**

HR-EI-MS spectrum of pentafluoro(2-methoxy-2-phenylpropyl)- $\lambda^6$ -sulfane (**8**).

MAT 95,+EI,Que 110,dir offen 10/12/2018 2:50:47 PM DR-804-4  
moe D. Rombach AK Wagenknecht  
dr8044\_181012145047 #3-6 RT: 0.29-0.54 AV: 4 NL: 3.98E5  
T: + c EI Full ms [49.50-450.50]

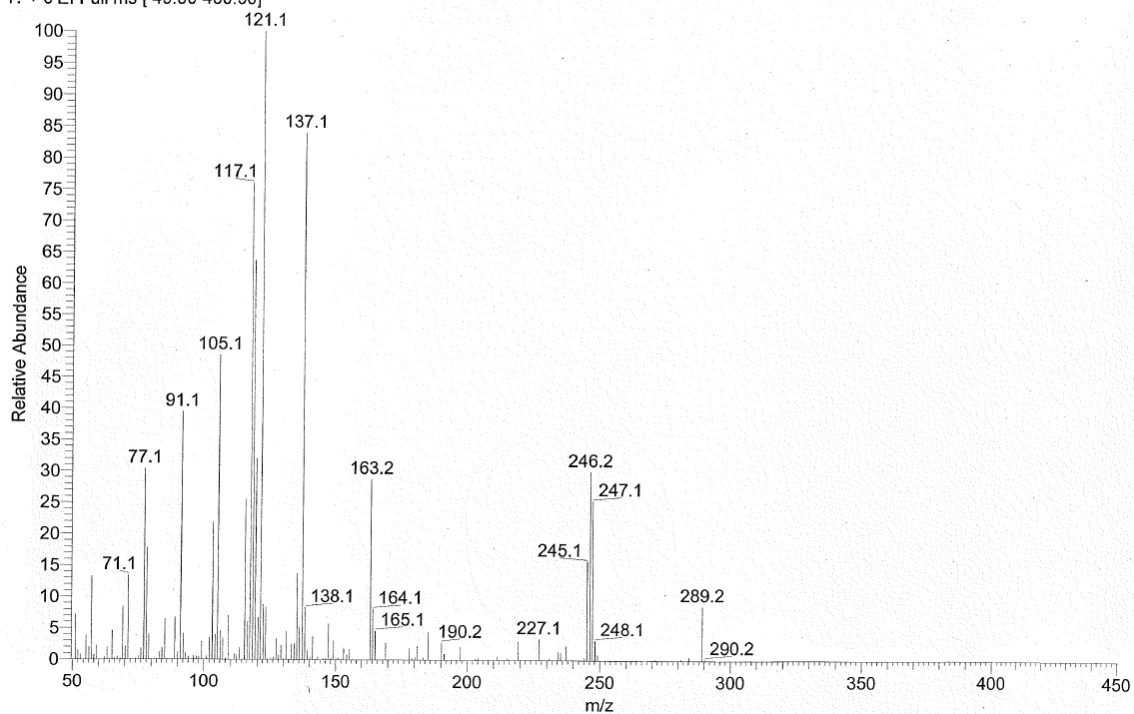

**Fig. S117**

EI-MS spectrum of pentafluoro(2-isopropoxy-2-phenylpropyl)- $\lambda^6$ -sulfane (**19**).

dr8044-c8 #11 RT: 0.99 AV: 1 NL: 5.60E3  
T: + c EI Full ms [ 49.34-450.34]

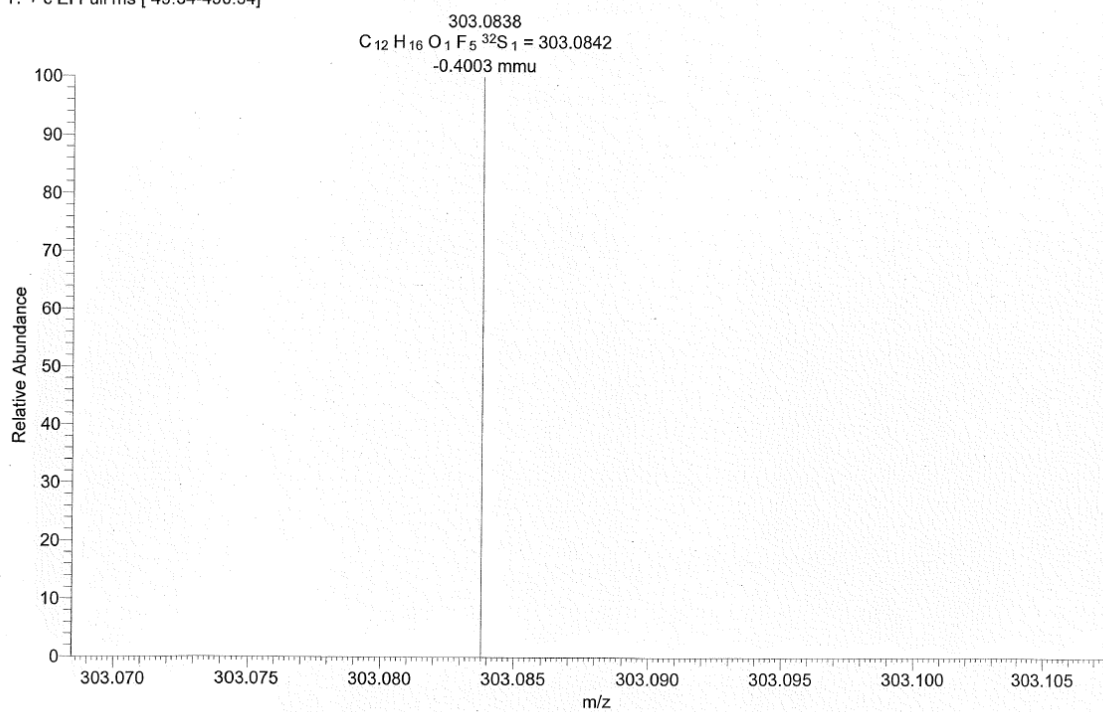

**Fig. S118**

HR-EI-MS spectrum of pentafluoro(2-isopropoxy-2-phenylpropyl)- $\lambda^6$ -sulfane (**19**).



dr8044-c9 #3 RT: 0.33 AV: 1 NL: 1.32E3  
T: + c EI Full ms [ 49.41-450.41]

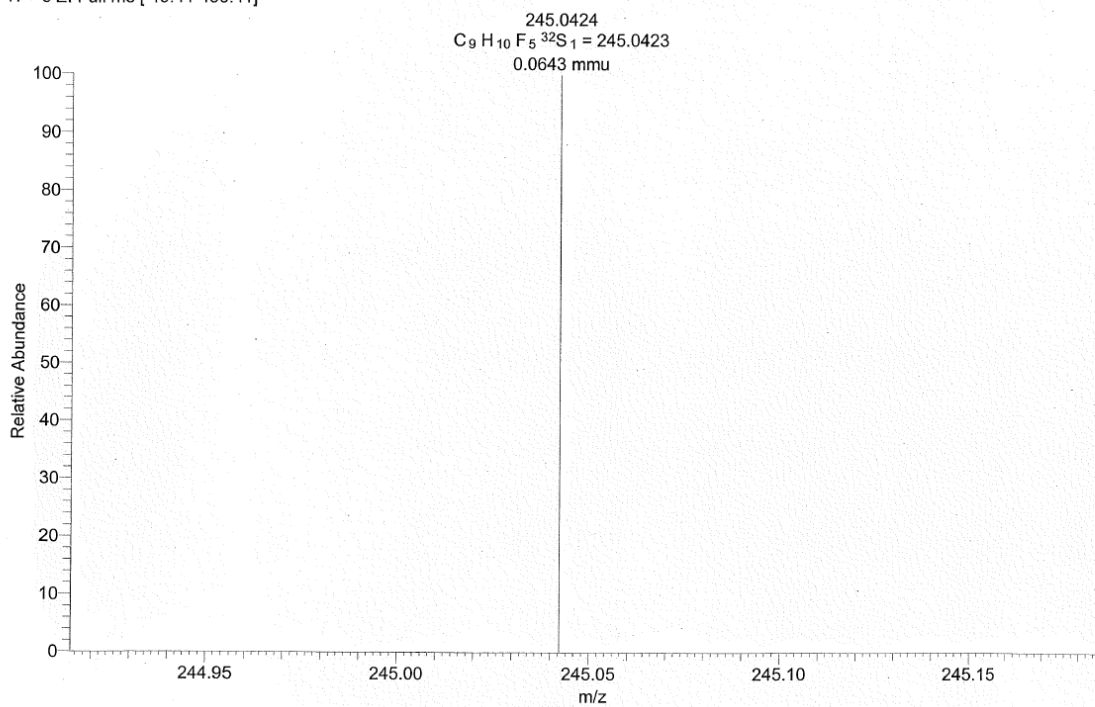

**Fig. S119**

HR-EI-MS spectrum of pentafluoro(2-isopropoxy-2-phenylpropyl)- $\lambda^6$ -sulfane (**19**).

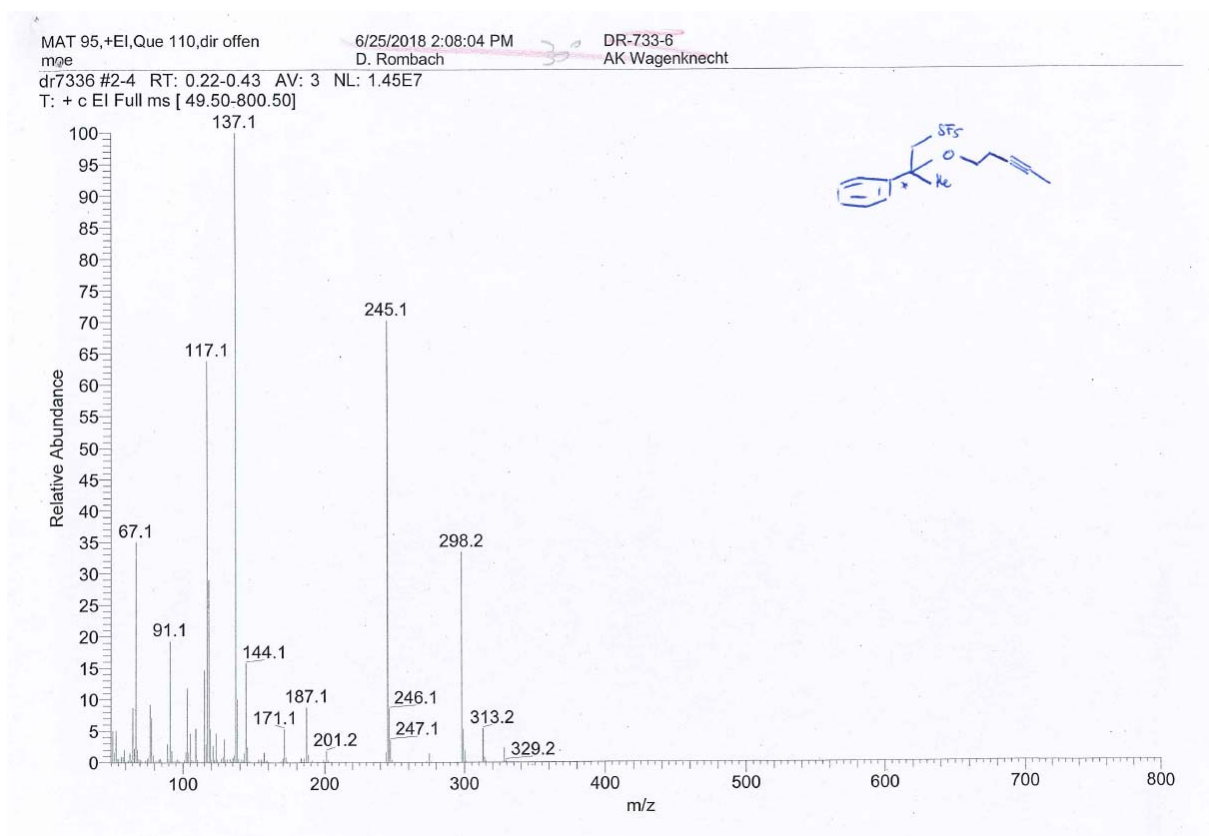

**Fig. S120**

EI-MS spectrum of pentafluoro(2-(pent-3-yn-1-yloxy)-2-phenylpropyl)- $\lambda^6$ -sulfane (**20**).

MAT 95,+EI,Que 110,dir offen  
moe  
dr7336 #2-4 RT: 0.22-0.43 AV: 3 NL: 7.76E5  
T: + c EI Full ms [ 49.50-800.50]

6/25/2018 2:08:04 PM  
D. Rombach

DR-733-6  
AK Wagenknecht

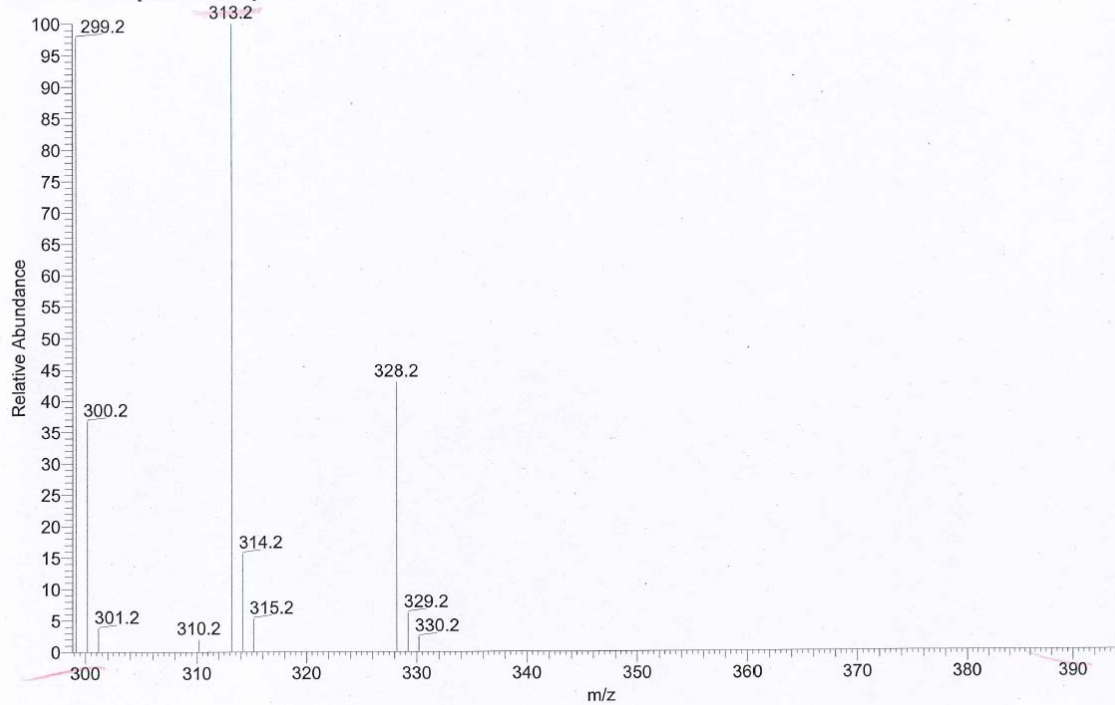

**Fig. S121**

EI-MS spectrum of pentafluoro(2-(pent-3-yn-1-yloxy)-2-phenylpropyl)- $\lambda^6$ -sulfane (**20**).

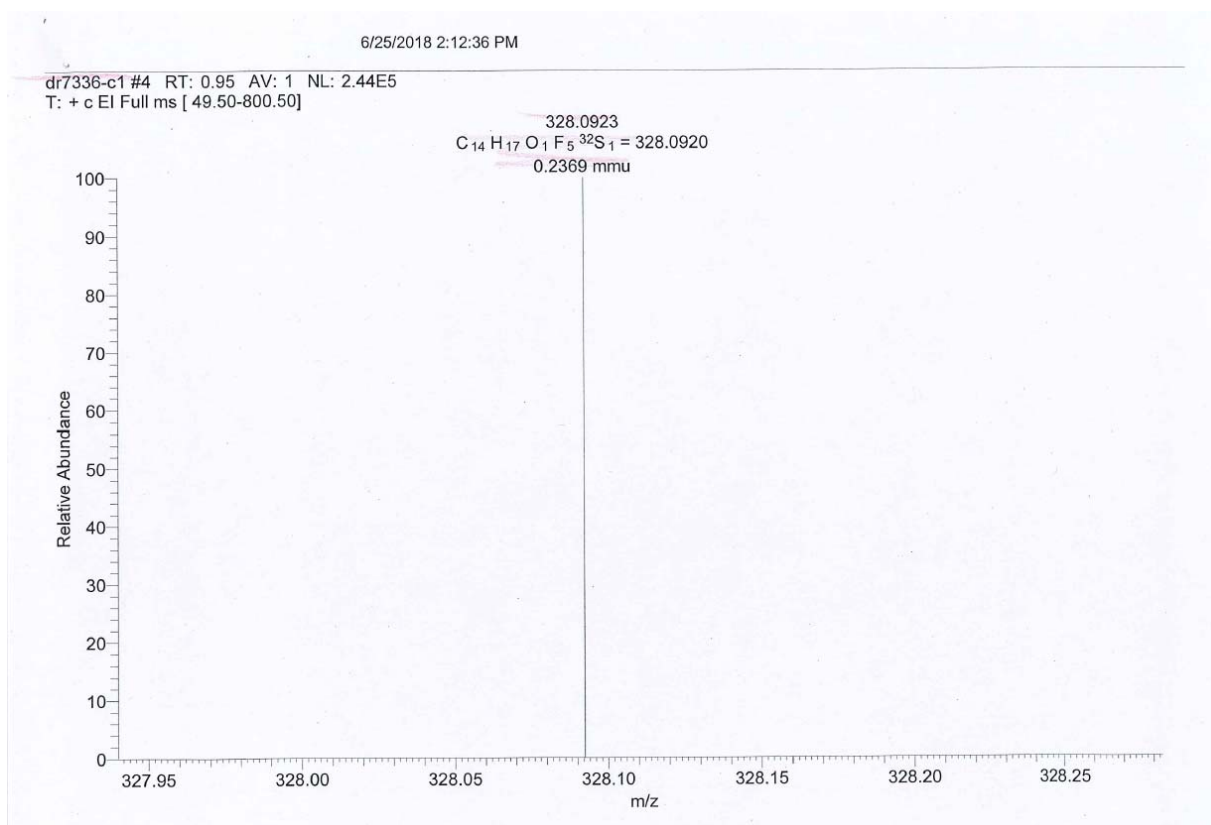

**Fig. S122**

HR-EI-MS spectrum of pentafluoro(2-(pent-3-yn-1-yloxy)-2-phenylpropyl)- $\lambda^6$ -sulfane (20).

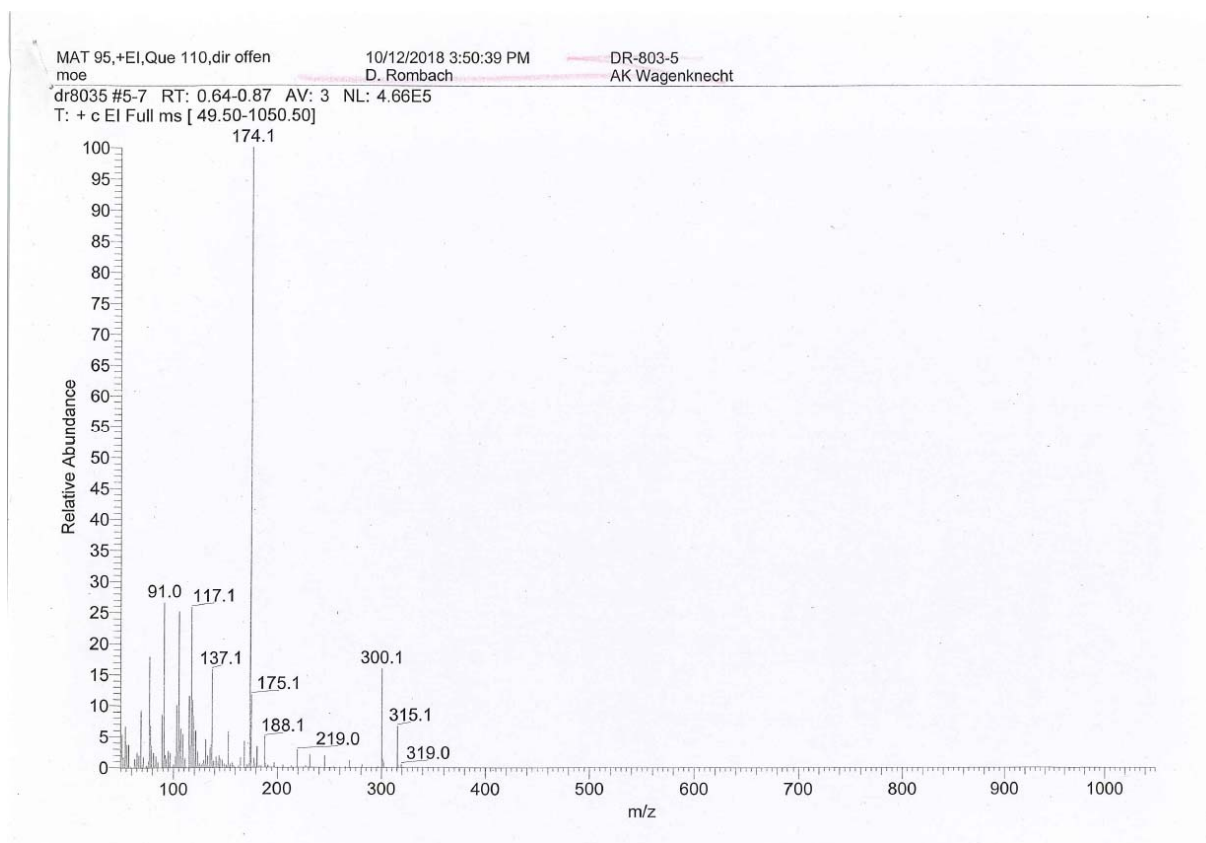

**Fig. S123**

EI-MS spectrum of 3-((1-(pentafluoro- $\lambda^6$ -sulfanyl)-2-phenylpropan-2-yl)oxy)propane-nitrile (**21**).

10/15/2018 12:23:17 PM

File recalibrated by CMass.

dr8035-c7 #1 RT: 0.19 AV: 1 NL: 1.75E4  
T: + c EI Full ms [ 49.43-1050.43]

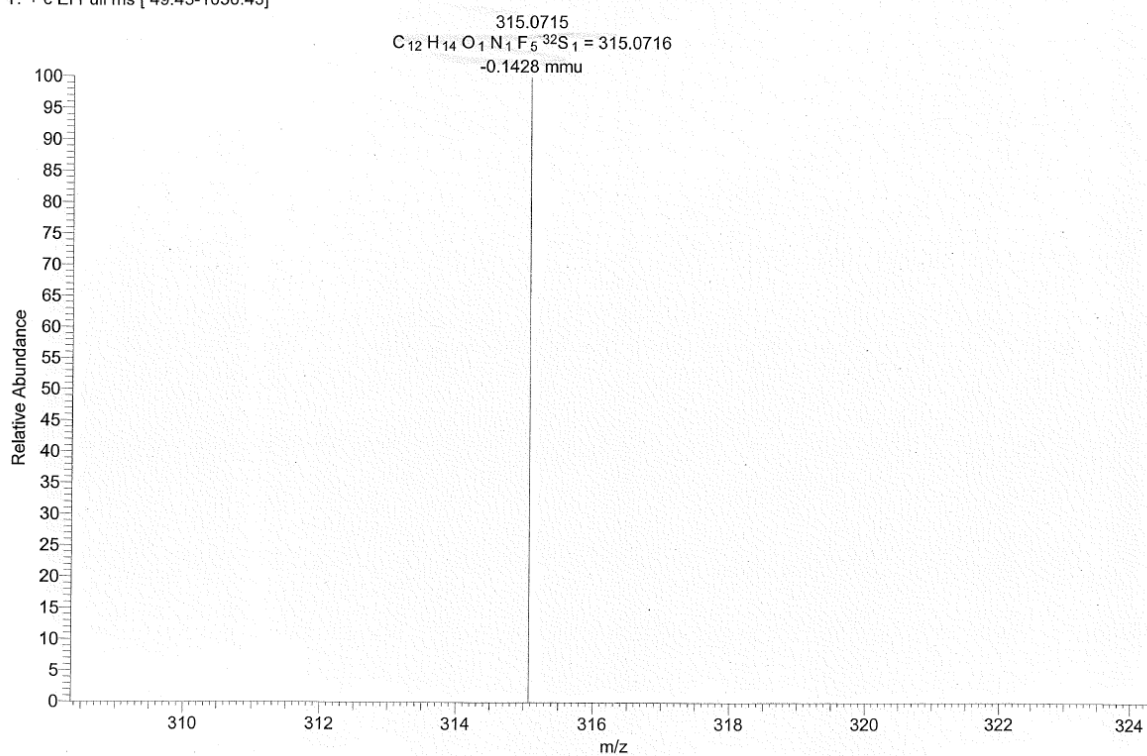

**Fig. S124**

HR-EI-MS spectrum of 3-((1-(pentafluoro- $\lambda^6$ -sulfaneyl)-2-phenylpropan-2-yl)oxy)propan-enitrile (**21**).

MAT 95,+EI,Que 110,dir offen 10/19/2018 3:54:59 PM 804-3-CC2-F20-24  
\*moe D. Rombach AK Wagenknecht  
dr8043cc2f2024\_181019155459 #3-6 RT: 0.27-0.52 AV: 4 NL: 8.61E5  
T: + c EI Full ms [ 49.50-450.50]

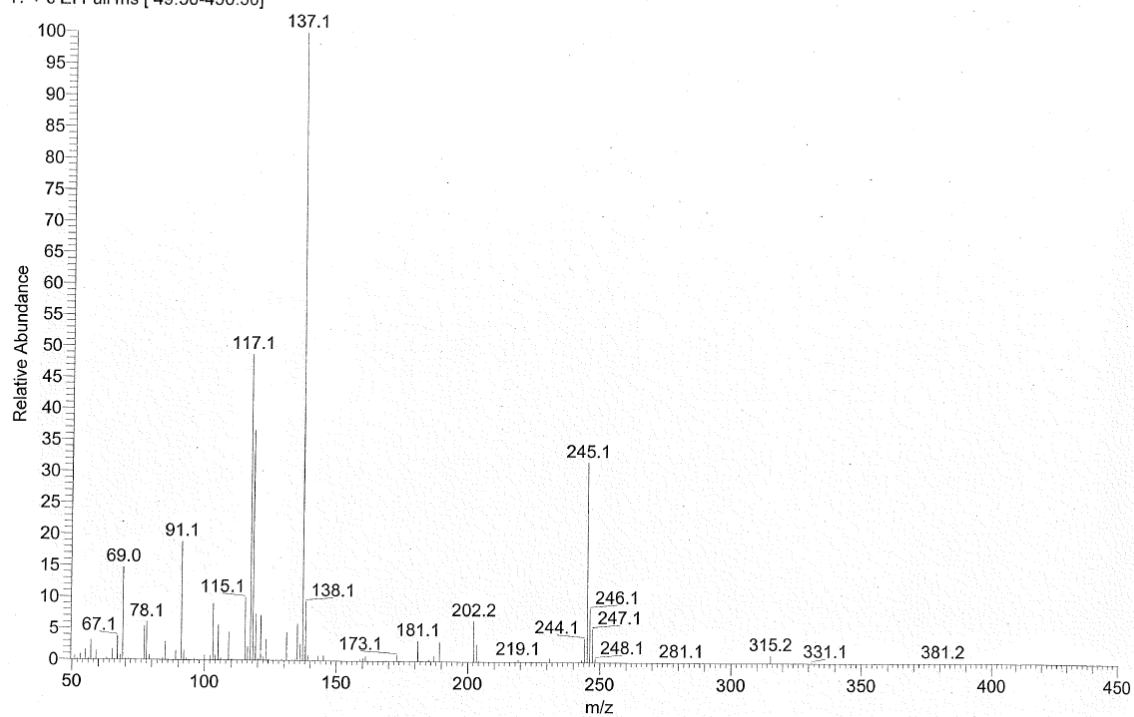

**Fig. S125**

EI-MS spectrum of (2-(cyclopentyloxy)-2-phenylpropyl)pentafluoro- $\lambda^6$ -sulfane (**22**).

8/7/2019 11:20:56 AM

File recalibrated by CMass.

dr8043cc2f2024\_181019155459-c5 #3 RT: 0.27 AV: 1 NL: 1.53E4  
T: + c EI Full ms [ 49.36-450.36]

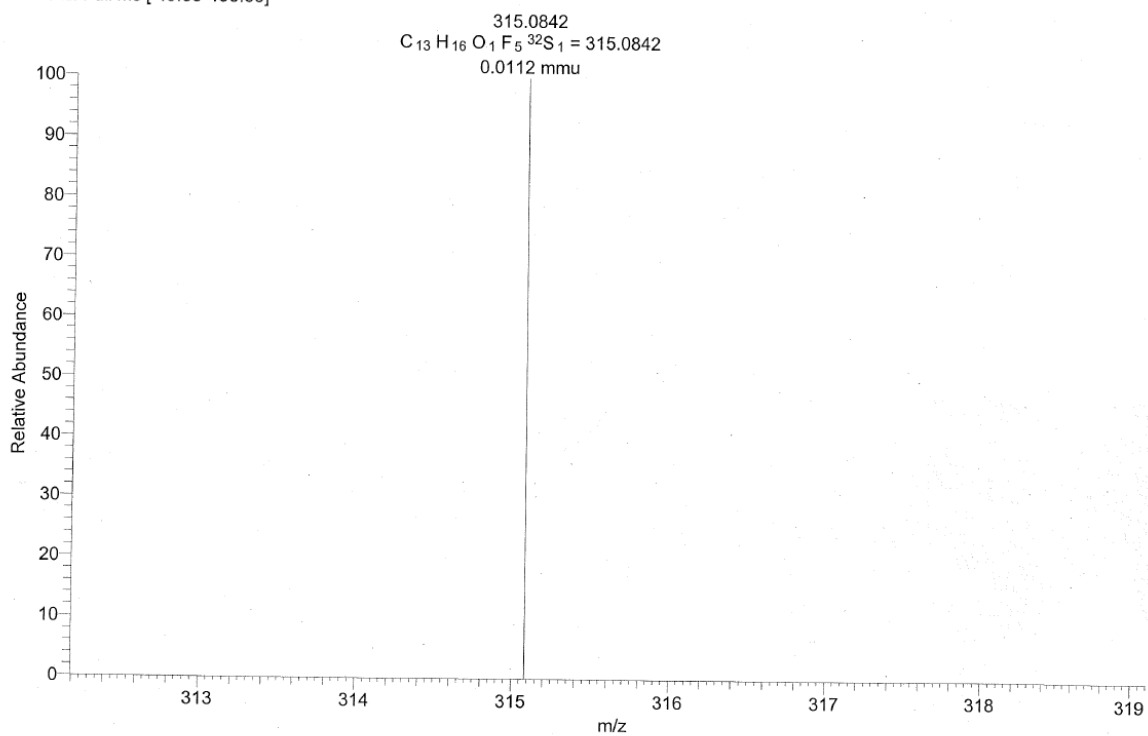

**Fig. S126**

HR-EI-MS spectrum of (2-(cyclopentyloxy)-2-phenylpropyl)pentafluoro- $\lambda^6$ -sulfane (**22**).



dr8043cc2f2024\_181019155459-c3 #7 RT: 0.60 AV: 1 NL: 1.18E5  
T: + c EI Full ms [ 49.40-450.40]

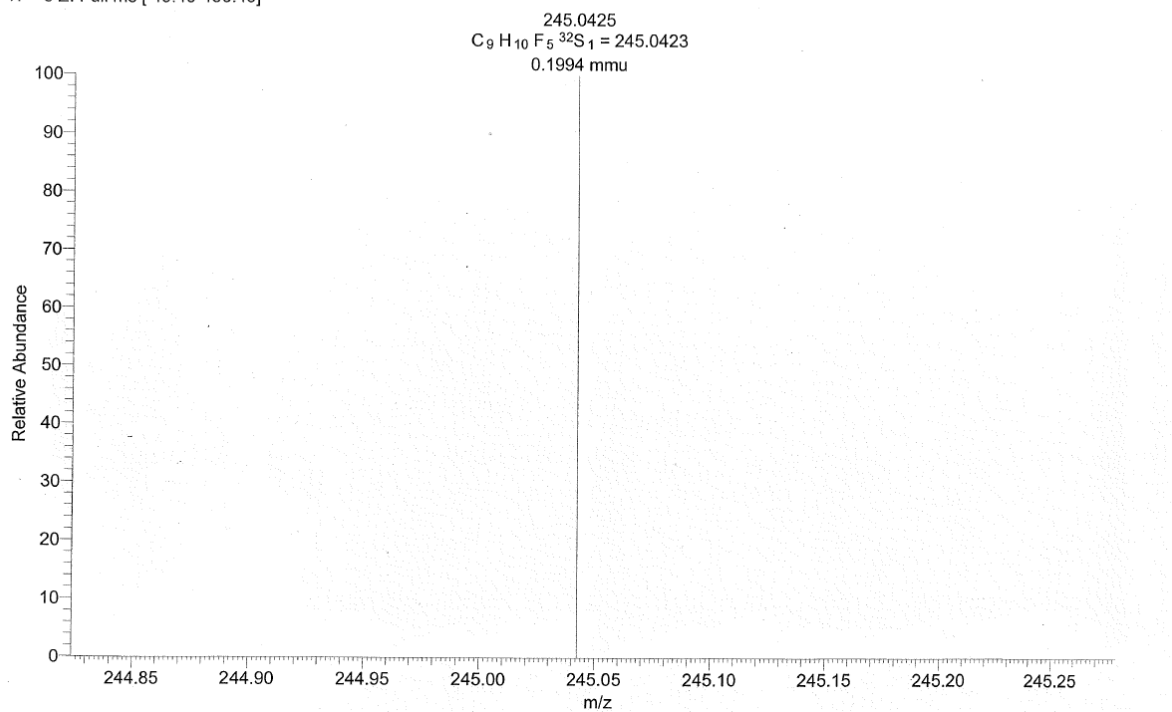

**Fig. S127**

HR-EI-MS spectrum of (2-(cyclopentyloxy)-2-phenylpropyl)pentafluoro- $\lambda^6$ -sulfane (**22**).

dr8043cc2f2024\_181019155459-c8 #3 RT: 0.27 AV: 1 NL: 3.97E4  
T: + c EI Full ms [ 49.43-450.43]

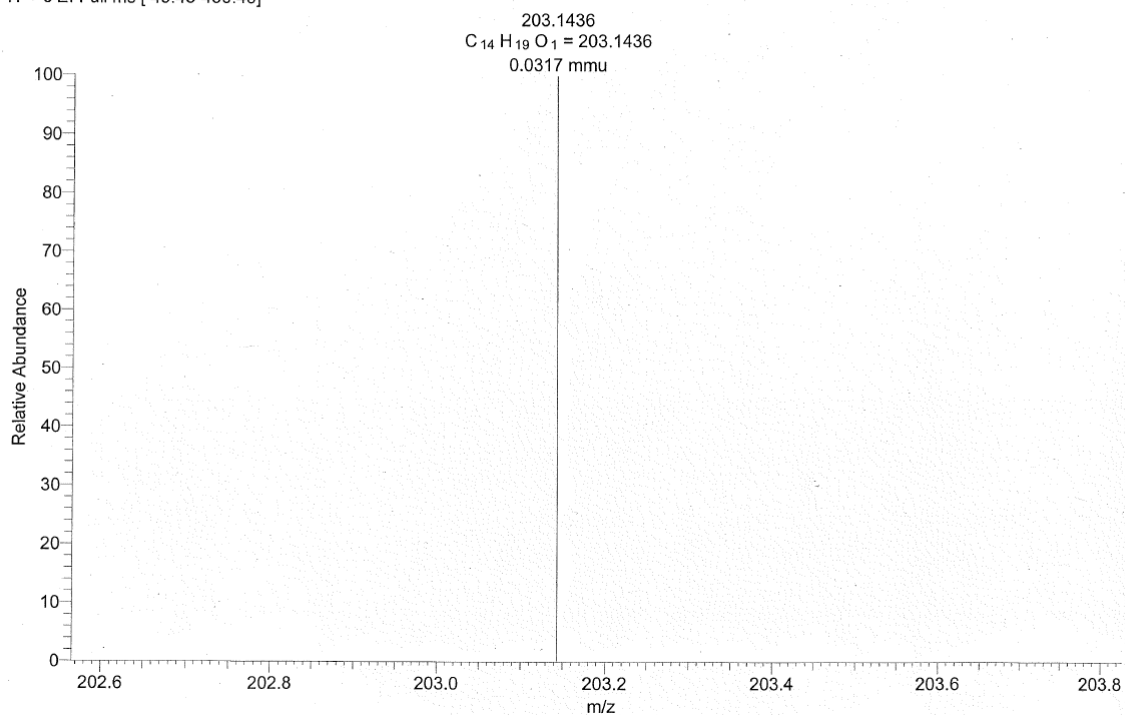

**Fig. S128**

HR-EI-MS spectrum of (2-(cyclopentyloxy)-2-phenylpropyl)pentafluoro- $\lambda^6$ -sulfane (**22**).

MAT 95,+EI,Que 110,dir offen 7/29/2019 11:10:54 AM DR-835-2 cc2  
moe D. Rombach AK Wagenknecht  
dr8352\_190729111054 #1-3 RT: 0.16-0.34 AV: 3 NL: 1.53E5  
T: + c EI Full ms [ 49.50-500.50]

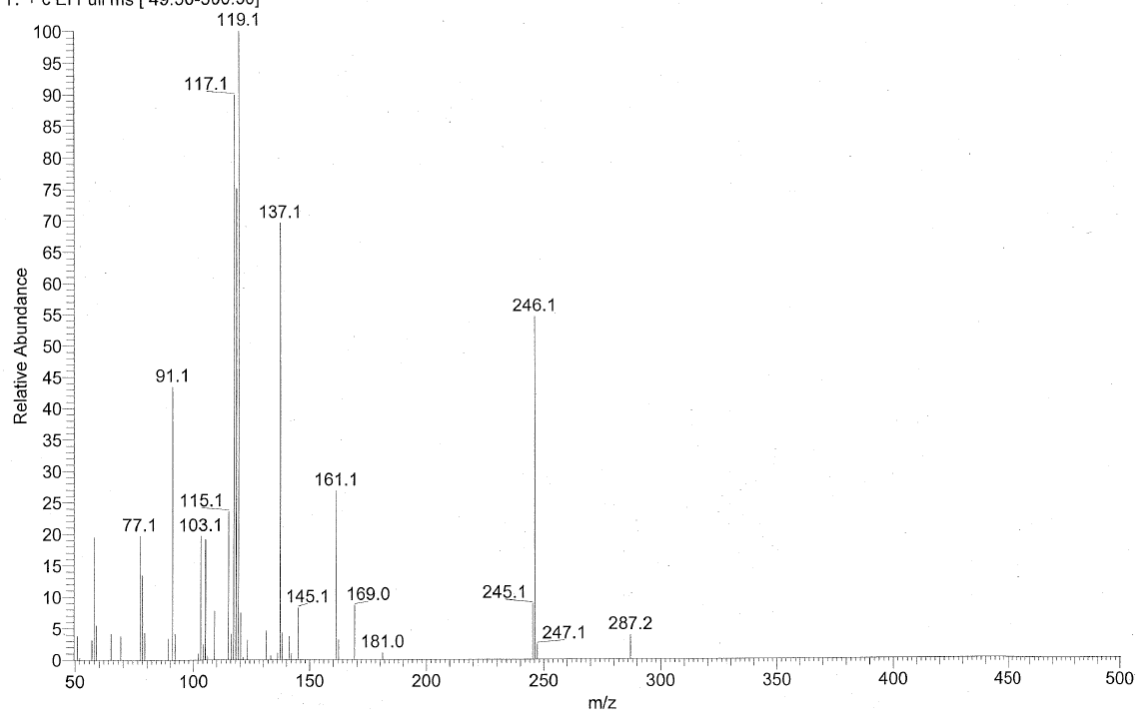

**Fig. S129**

EI-MS spectrum of (2-(allyloxy)-2-phenylpropyl)pentafluoro- $\lambda^6$ -sulfane (**23**).

7/29/2019 11:21:02 AM

File recalibrated by CMass.

dr8352\_190729111054-c4 #2 RT: 0.25 AV: 1 NL: 7.58E3  
T: + c EI Full ms [ 49.39-500.39]

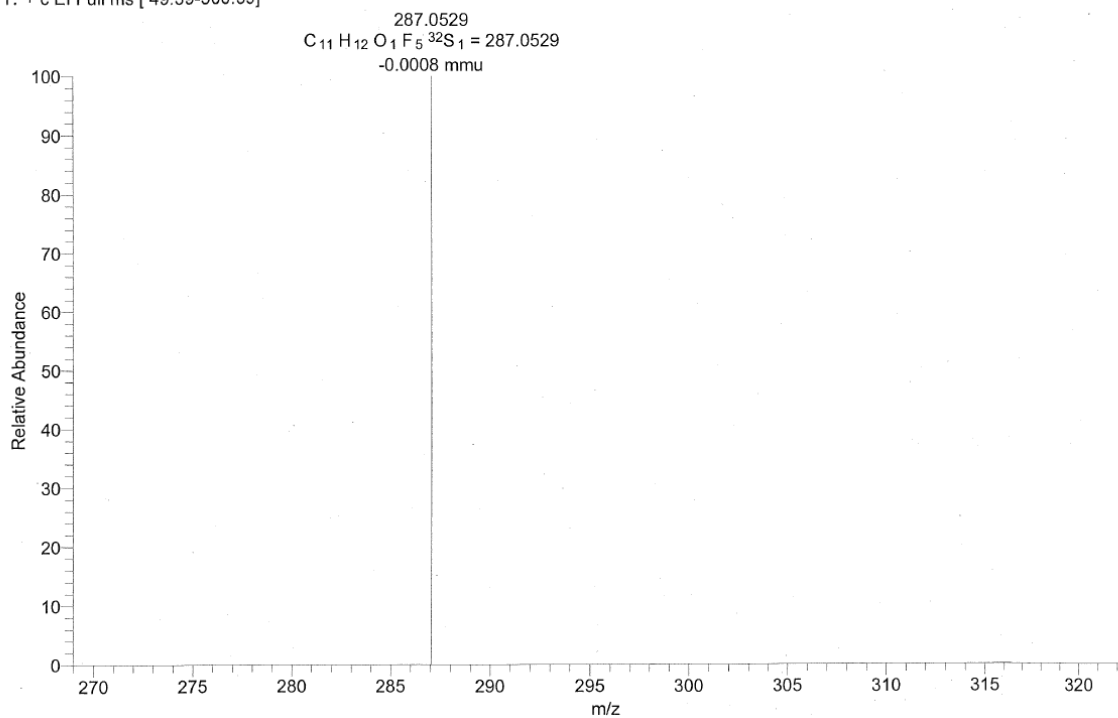

**Fig. S130**

EI-MS spectrum of (2-(allyloxy)-2-phenylpropyl)pentafluoro- $\lambda^6$ -sulfane (**23**).

dr8352\_190729111054-c8 #3 RT: 0.34 AV: 1 NL: 2.36E4  
T: + c EI Full ms [49.45-500.45]

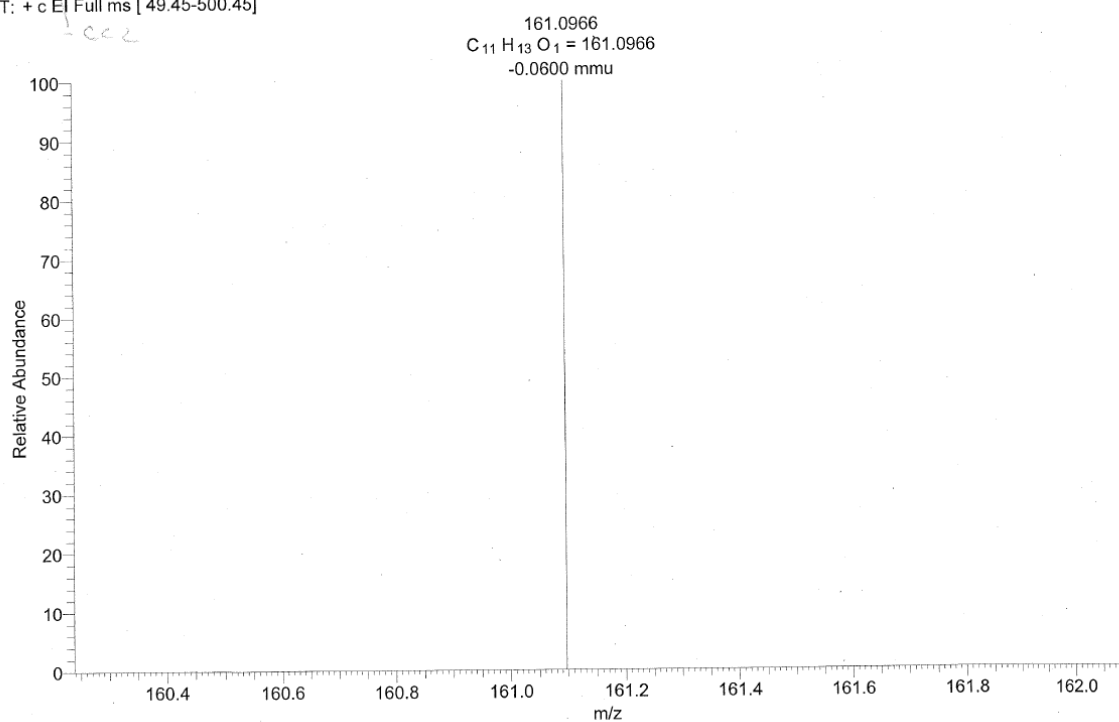

**Fig. S131**

EI-MS spectrum of (2-(allyloxy)-2-phenylpropyl)pentafluoro- $\lambda^6$ -sulfane (**23**).

dr8352\_190729111054-c5 #14 RT: 1.29 AV: 1 NL: 1.09E4  
T: + c EI Full ms [ 49.42-500.42]

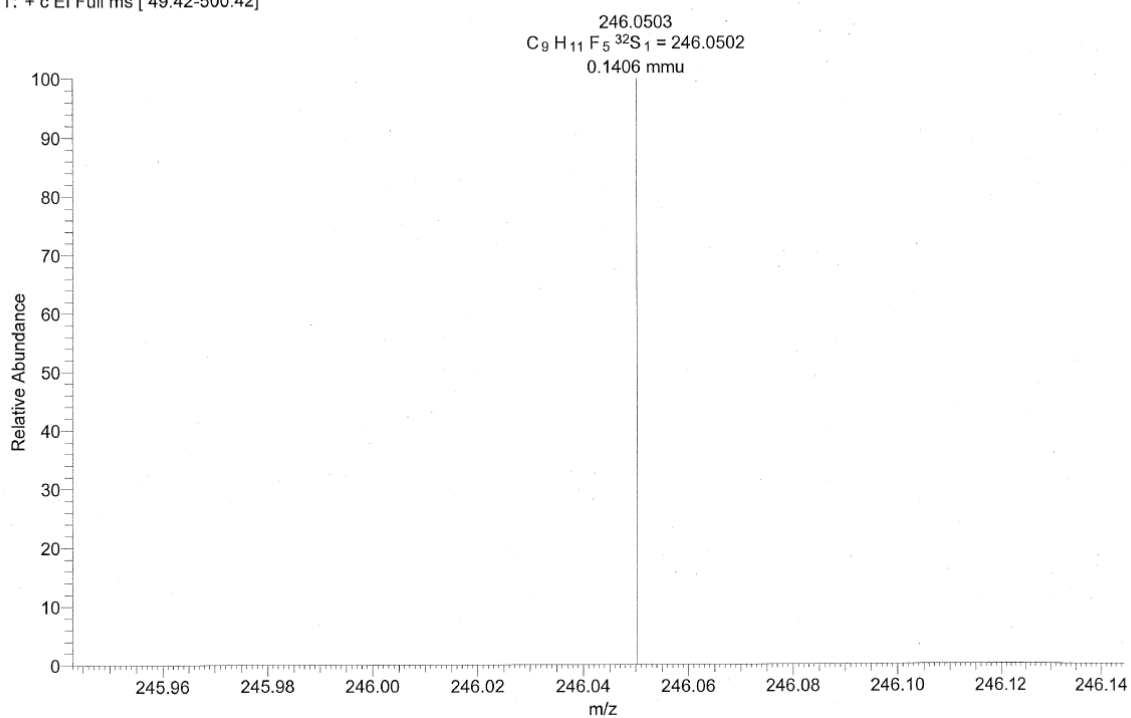

**Fig. S132**

EI-MS spectrum of (2-(allyloxy)-2-phenylpropyl)pentafluoro- $\lambda^6$ -sulfane (**23**).

MAT 95,+EI,Que 110,dir offen 7/23/2019 10:38:44 AM DR-835-4-cc1-F18-39  
moe D. Rombach AK Wagenknecht  
dr8354\_190723103844 #1-3 RT: 0.14-0.31 AV: 3 NL: 2.71E6  
T: + c EI Full ms [ 49.50-450.50]

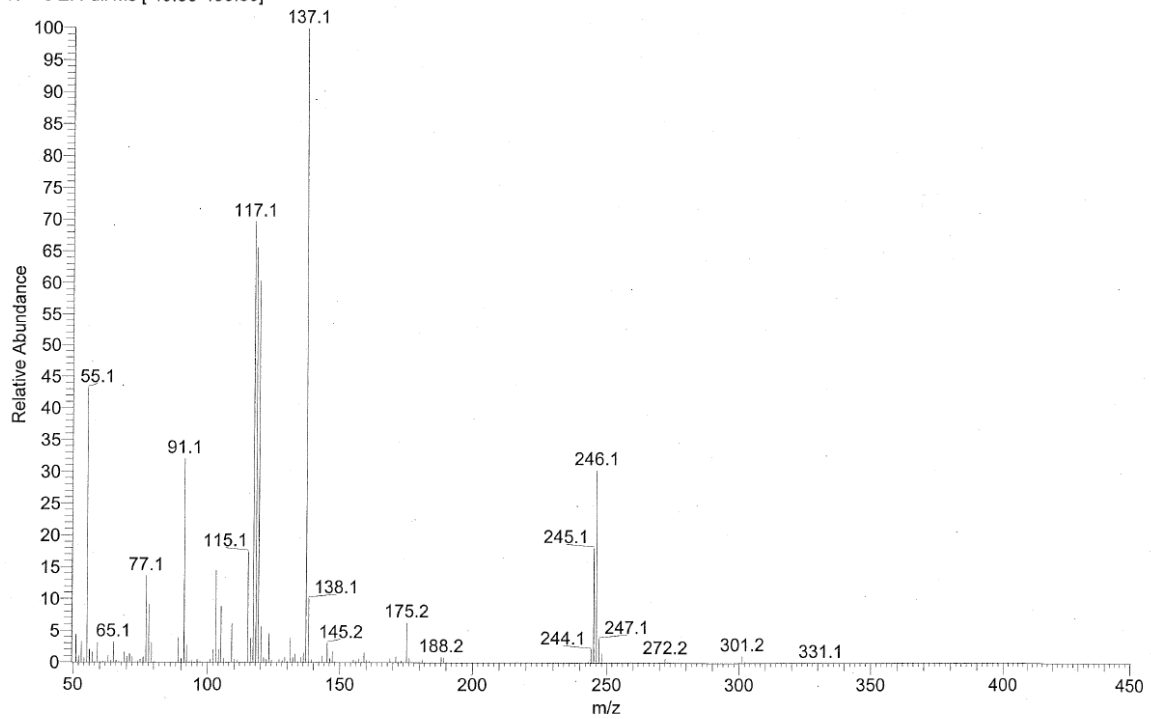

**Fig. S133**

EI-MS spectrum of pentafluoro(2-((2-methylallyl)oxy)-2-phenylpropyl)- $\lambda^6$ -sulfane (**24**).

MAT 95,+EI,Que 110,dir offen 7/23/2019 10:38:44 AM DR-835-4-cc1-F18-39  
moe D. Rombach AK Wagenknecht  
dr8354\_190723103844 #1-3 RT: 0.14-0.31 AV: 3 NL: 3.03E4  
T: + c EI Full ms [ 49.50-450.50]

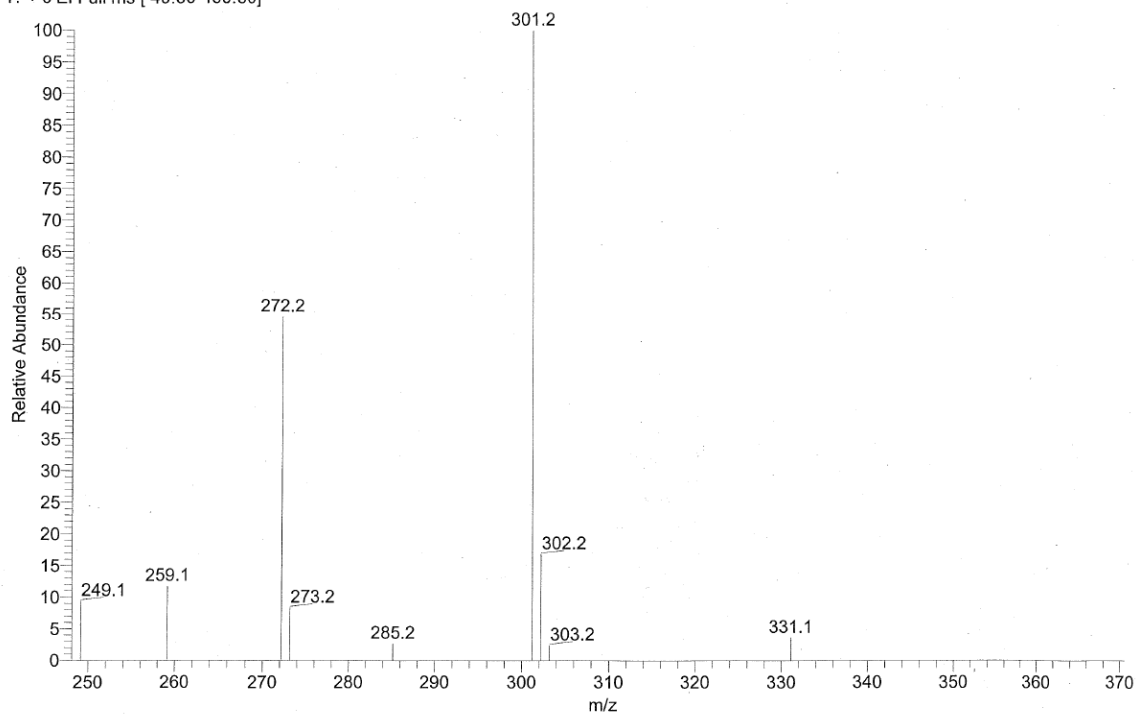

**Fig. S134**

EI-MS spectrum of pentafluoro(2-((2-methylallyl)oxy)-2-phenylpropyl)- $\lambda^6$ -sulfane (**24**).



dr8354\_190723103844-c6 #1 RT: 0.14 AV: 1 NL: 2.83E4  
T: + c EI Full ms [ 49.36-450.36]

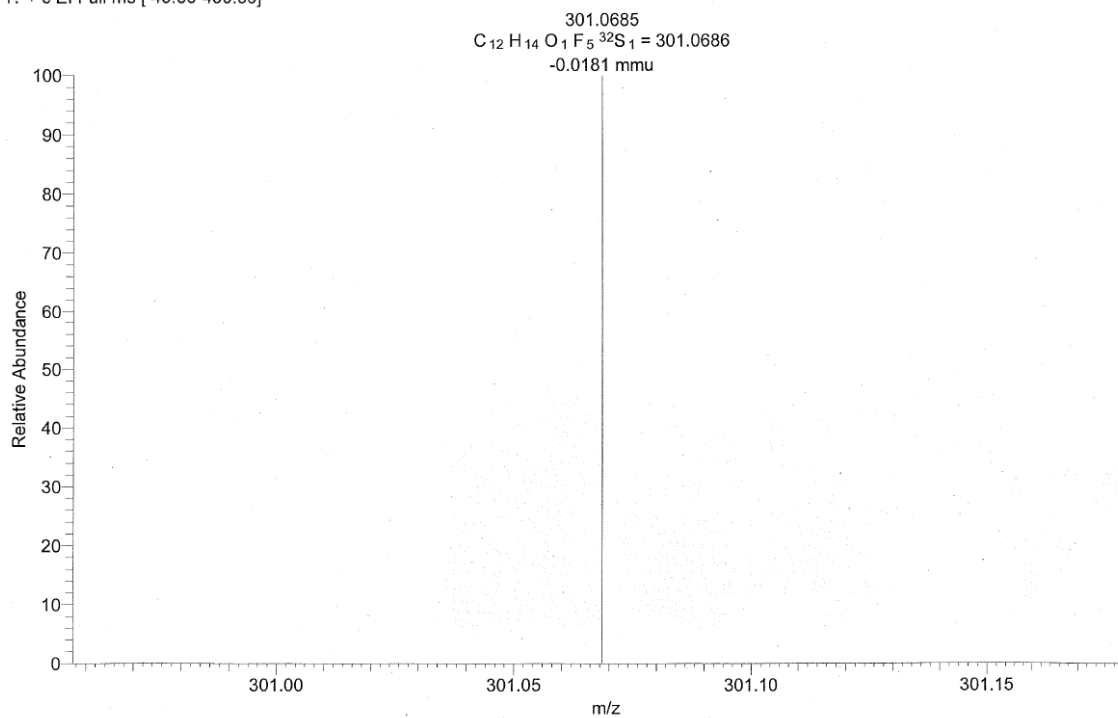

**Fig. S135**

HR-EI-MS spectrum of pentafluoro(2-((2-methylallyl)oxy)-2-phenylpropyl)- $\lambda^6$ -sulfane (24).

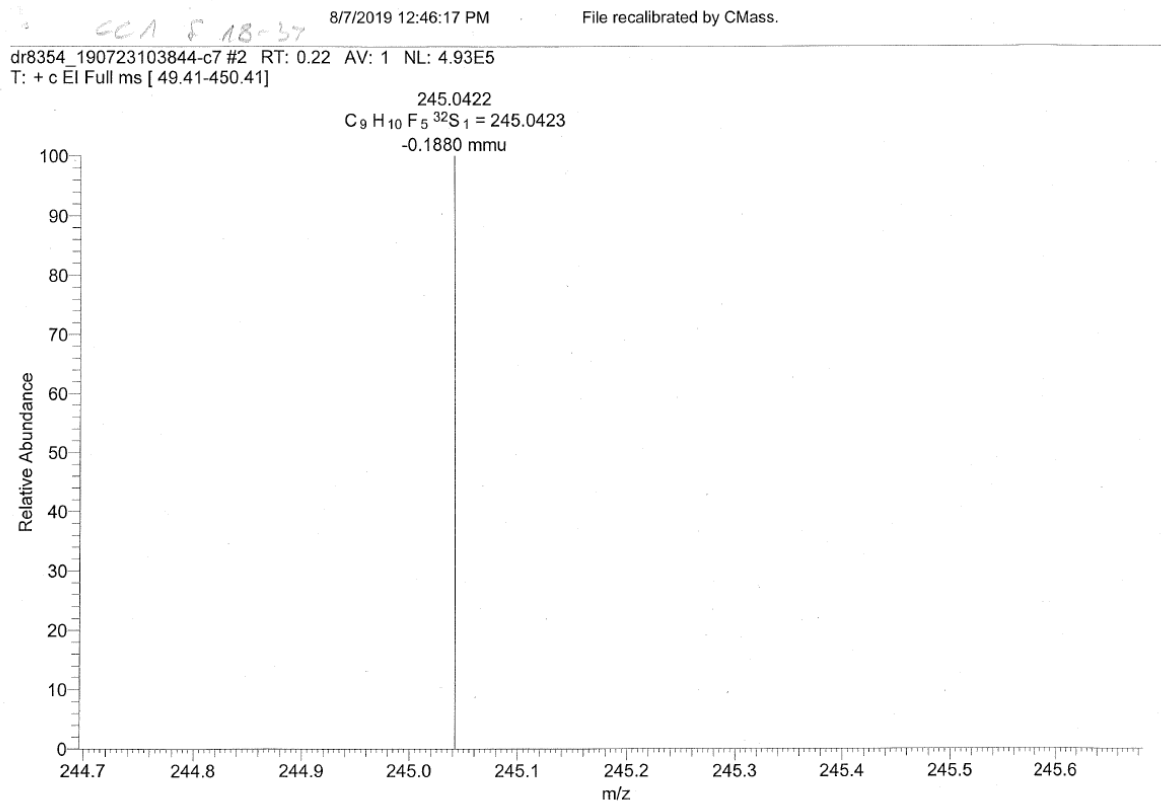

**Fig. S136**

HR-EI-MS spectrum of pentafluoro(2-((2-methylallyl)oxy)-2-phenylpropyl)- $\lambda^6$ -sulfane (24).

MAT 95,+EI,Que 110,dir offen 7/23/2019 11:08:40 AM DR-833-12-F2  
mpe D. Rombach 20 AK Wagenknecht  
dr83312f2 #1-3 RT: 0.16-0.32 AV: 3 NL: 3.83E6  
T: + c EI Full ms [ 49.50-450.50]

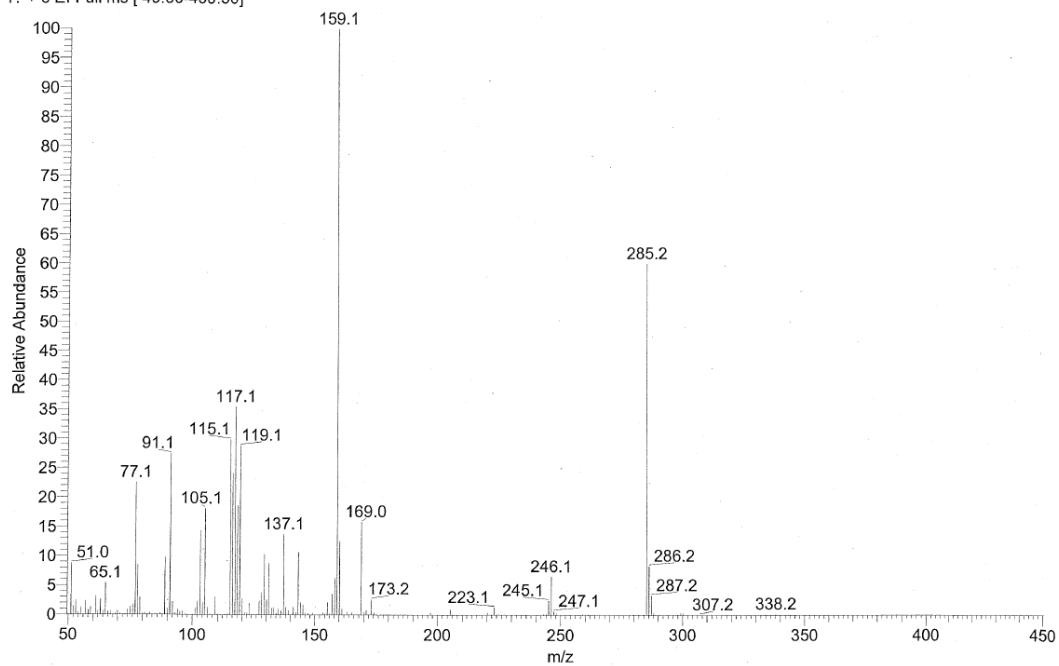

**Fig. S137**

EI-MS spectrum of pentafluoro(2-phenyl-2-(prop-2-yn-1-yloxy)propyl)- $\lambda^6$ -sulfane (**25**).

MAT 95,+EI,Que 110,dir offen 7/23/2019 11:08:40 AM DR-833-12-F2  
moe D. Rombach AK Wagenknecht  
dr83312f2 #1-3 RT: 0.16-0.32 AV: 3 NL: 1.37E4  
T: + c EI Full ms [ 49.50-450.50]

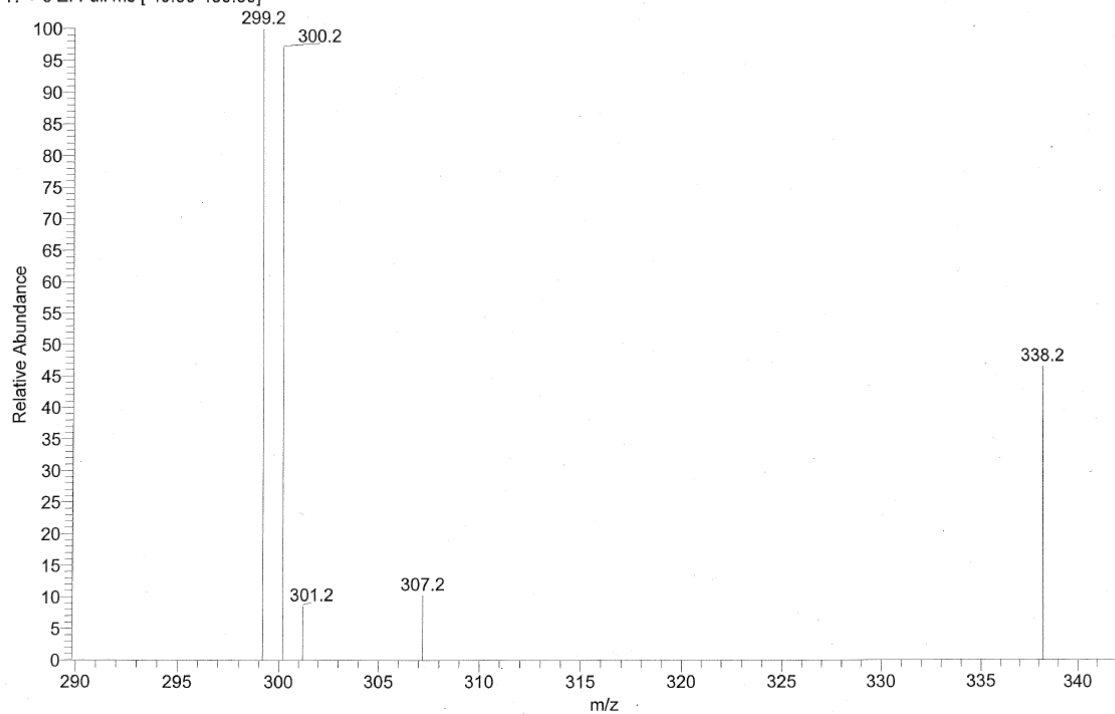

**Fig. S138**

EI-MS spectrum of pentafluoro(2-phenyl-2-(prop-2-yn-1-yloxy)propyl)- $\lambda^6$ -sulfane (**25**).

dr83312f2-c5 #2 RT: 0.24 AV: 1 NL: 1.42E4  
T: + c EI Full ms [ 49.37-450.37]

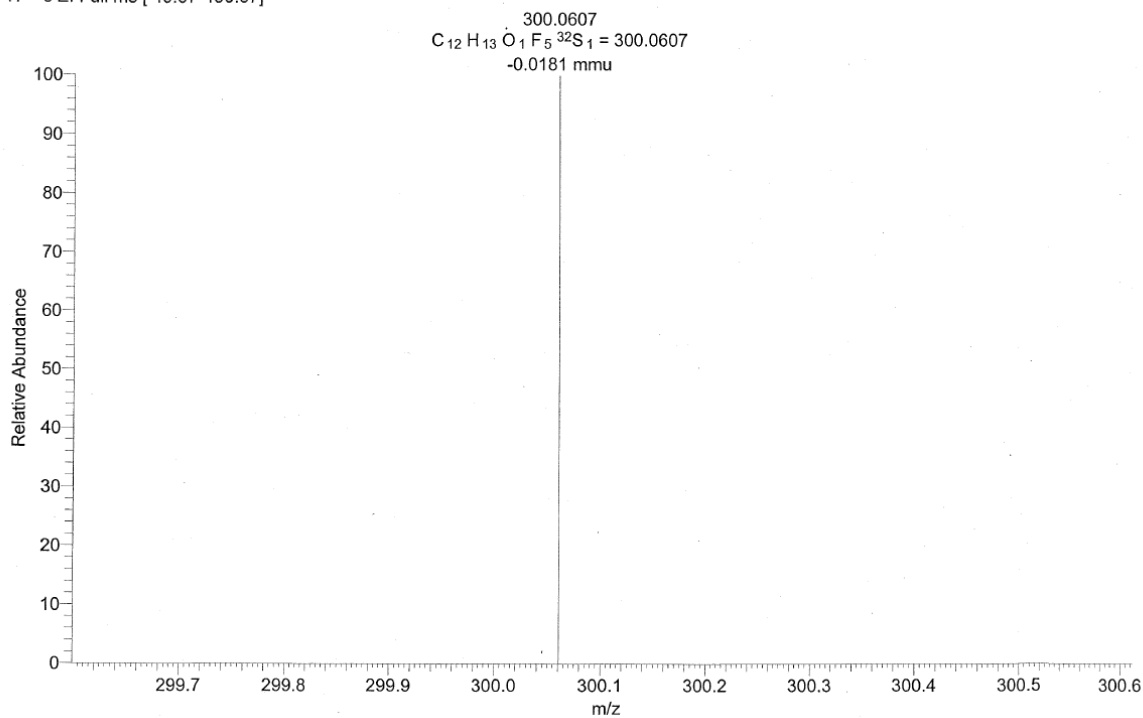

**Fig. S139**

HR-EI-MS spectrum of pentafluoro(2-phenyl-2-(prop-2-yn-1-yloxy)propyl)- $\lambda^6$ -sulfane (25).

MAT 95,+EI,Que 110,dir offen 7/22/2019 4:17:49 PM DR-833-34-lin nmr  
moç D. Rombach 20° AK Wagenknecht  
dr83334lin #3-5 RT: 0.28-0.44 AV: 3 NL: 1.58E6  
T: + c EI Full ms [ 49.50-450.50]

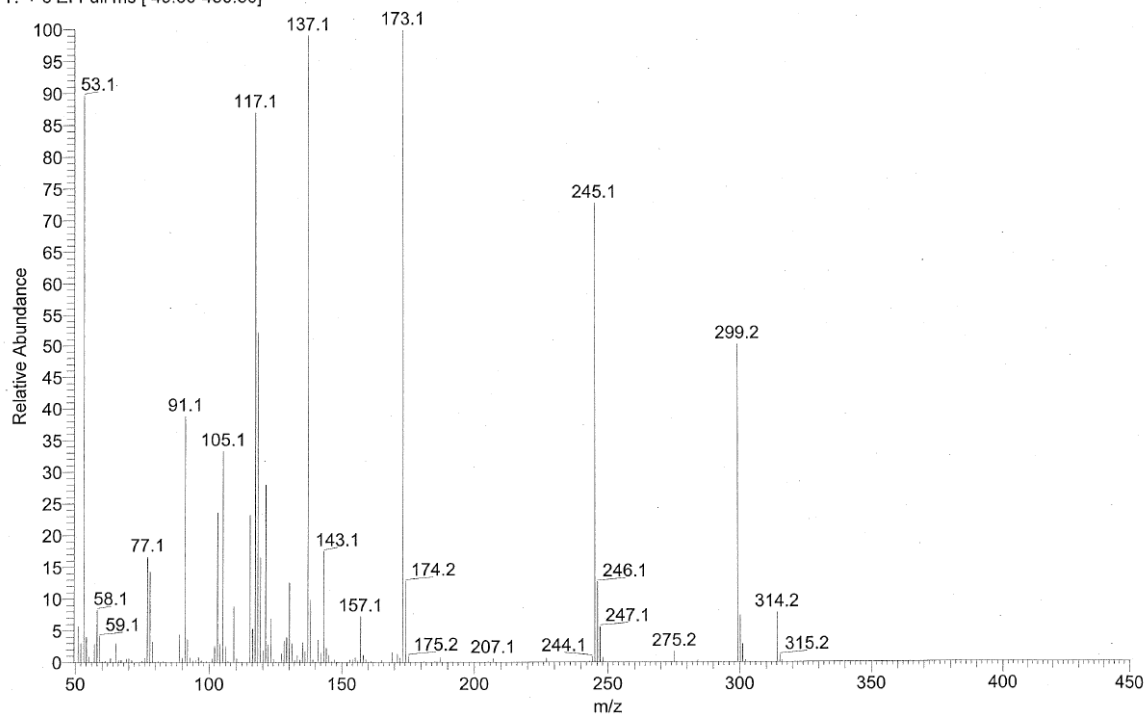

**Fig. S140**

HR-EI-MS spectrum of (2-(but-3-yn-1-yloxy)-2-phenylpropyl)pentafluoro- $\lambda^6$ -sulfane (**26**).

dr83334lin-c6 #3 RT: 0.28 AV: 1 NL: 1.38E5  
T: + c EI Full ms [ 49.37-450.37]

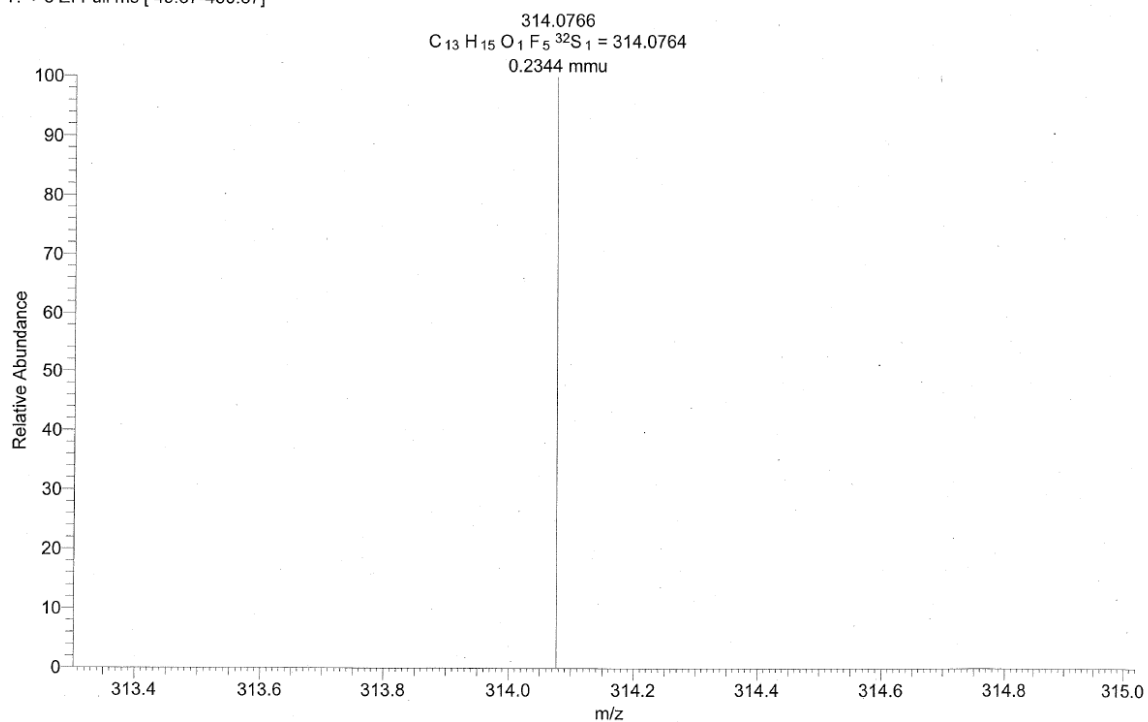

**Fig. S141**

HR-EI-MS spectrum of (2-(but-3-yn-1-yloxy)-2-phenylpropyl)pentafluoro- $\lambda^6$ -sulfane (**26**).

MAT 95,+EI,Que 110,dir offen 8/12/2019 12:51:57 PM DR-831-34 pure  
moe D. Rombach 20' AK Wagenknecht  
dr83134pure #3-5 RT: 0.37-0.45 AV: 2 NL: 1.21E6  
T: + c EI Full ms [ 49.50-500.50]

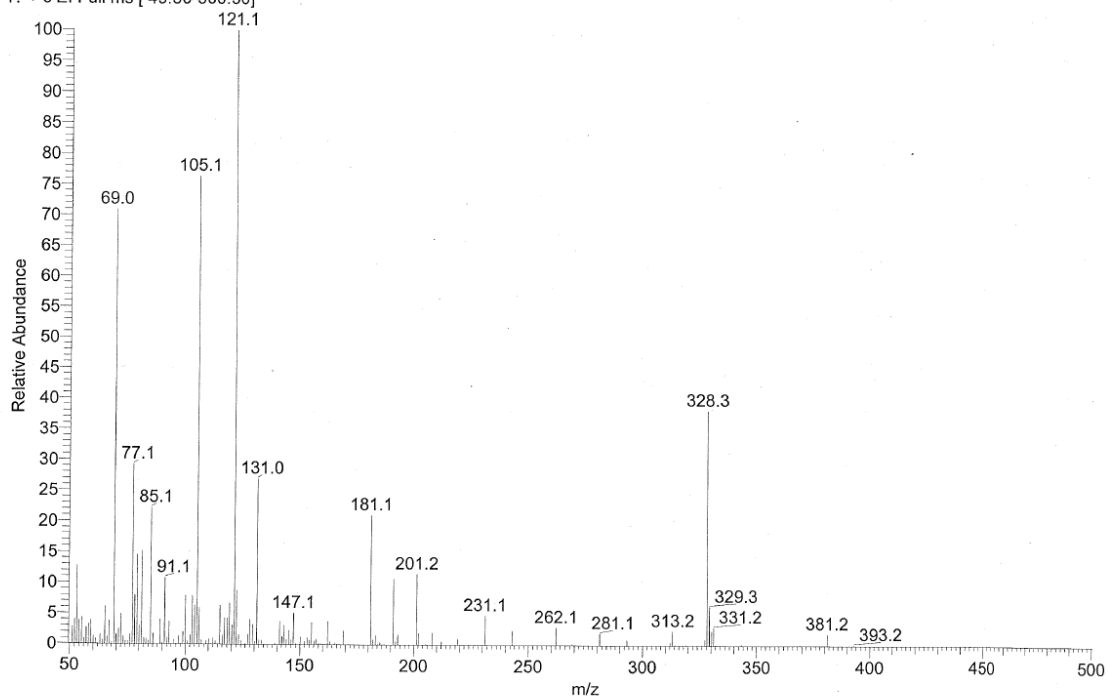

**Fig. S144**

EI-MS spectrum of pentafluoro(2-(pent-4-yn-1-yloxy)-2-phenylpropyl)- $\lambda^6$ -sulfane (**27**).



8/12/2019 1:00:29 PM

File recalibrated by CMass.

dr83134pure-c6 #19 RT: 1.67 AV: 1 NL: 1.18E4  
T: + c EI Full ms [ 49.35-500.35]

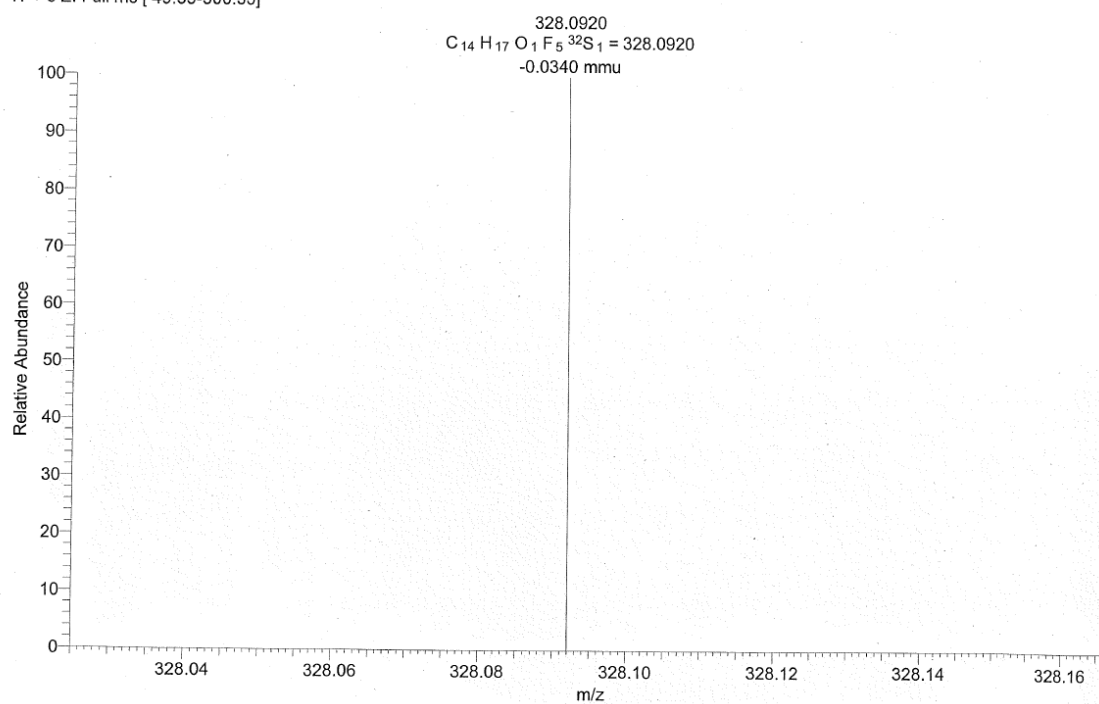

**Fig. S145**

HR-EI-MS spectrum of pentafluoro(2-(pent-4-yn-1-yloxy)-2-phenylpropyl)- $\lambda^6$ -sulfane (27).

MAT 95,+EI,Que 110,dir offen .10/19/2018 4:51:25 PM 804-2-CC1-F24  
mpe D. Rombach AK Wagenknecht  
dr8042cc1f24 #2-5 RT: 0.22-0.45 AV: 4 NL: 6.05E6  
T: + c EI Full ms [ 49.50-400.50]

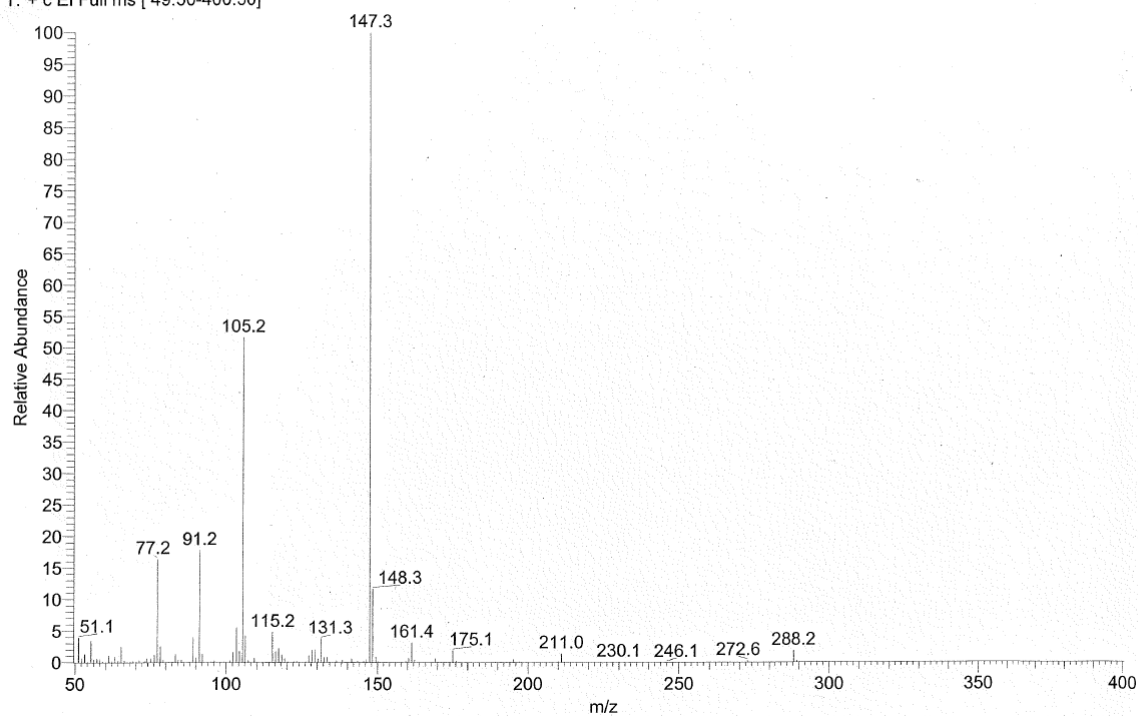

**Fig. S146**

EI-MS spectrum of 2-((pentafluoro- $\lambda^6$ -sulfaneyl)methyl)-2-phenyltetrahydrofuran (**28**).

MAT 95,+EI,Que 110,dir offen 10/19/2018 4:51:25 PM 804-2-CC1-F24  
mpe D. Rombach AK Wagenknecht  
dr8042cc1f24 #2-5 RT: 0.22-0.45 AV: 4 NL: 1.13E5  
T: + c EI Full ms [ 49.50-400.50]

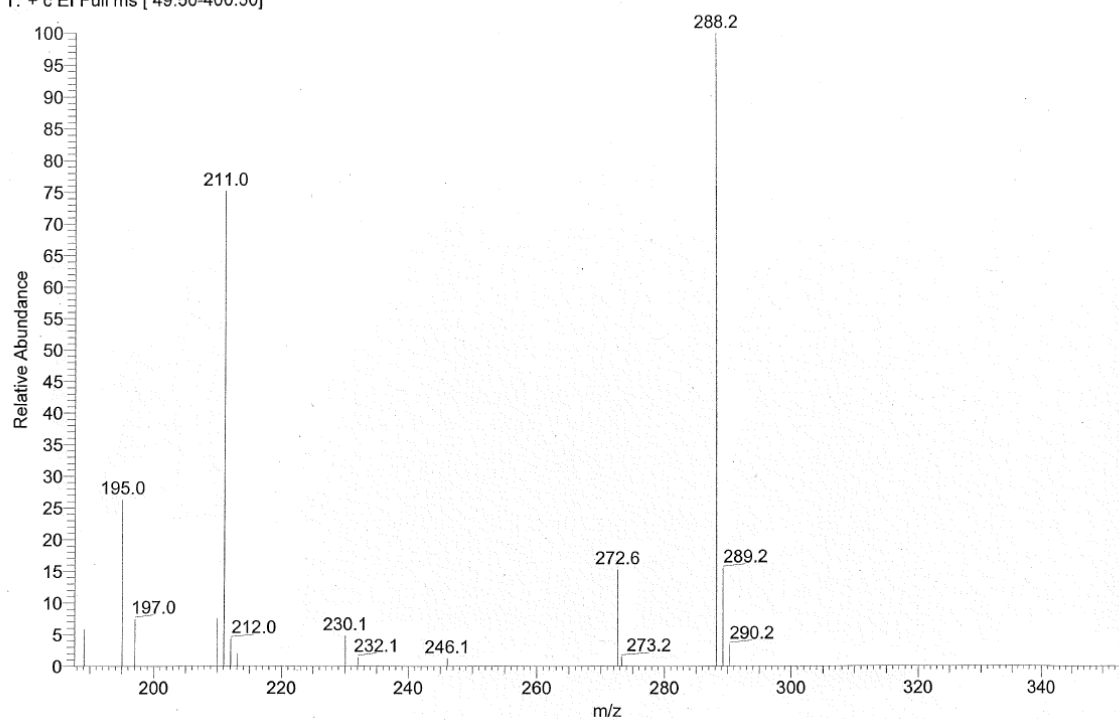

**Fig. S147**

EI-MS spectrum of 2-((pentafluoro- $\lambda^6$ -sulfanyl)methyl)-2-phenyltetrahydrofuran (**28**).

dr8042cc1f24-c2 #4 RT: 0.38 AV: 1 NL: 7.74E4  
T: + c EI Full ms [ 49.38-400.38]

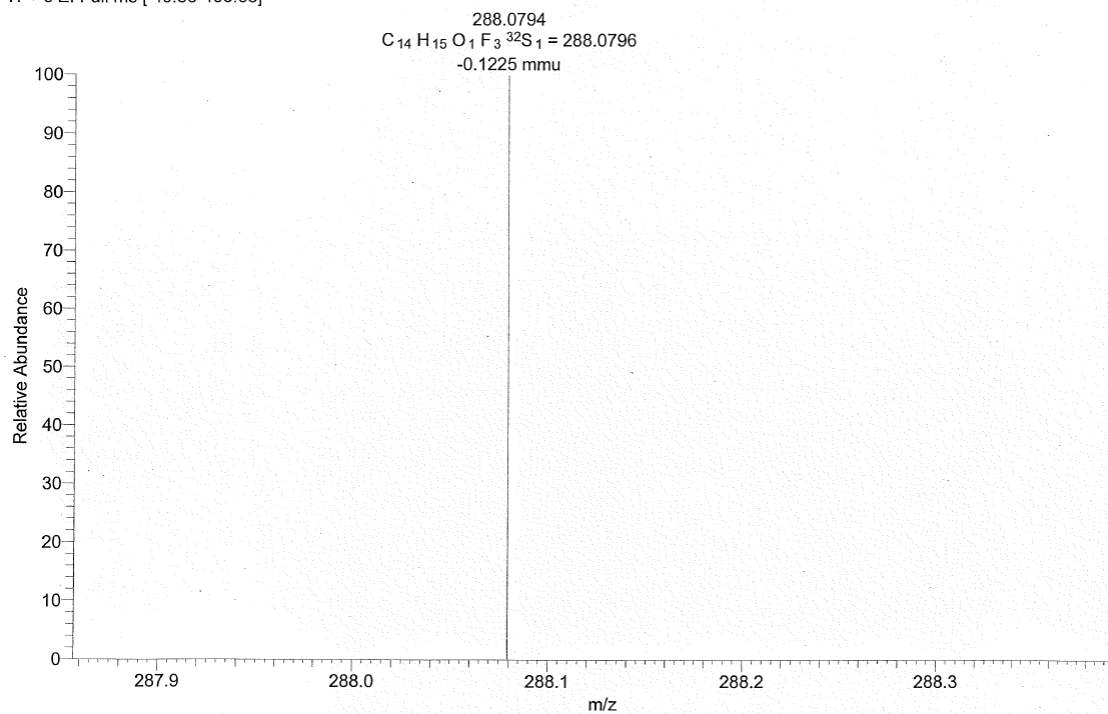

**Fig. S148**

HR-EI-MS spectrum of 2-((pentafluoro- $\lambda^6$ -sulfaneyl)methyl)-2-phenyltetrahydrofuran (**28**).

MAT 95,+EI,Que 110,dir offen

4/1/2019 3:25:06 PM

40°

DR-821-5-CC2-F69-73

moe

D. Rombach

AK Wagenknecht

dr:8215cc2 #1-3 RT: 0.09-0.26 AV: 3

NL: 5.56E5

T: + c EI Full ms [ 49.50-450.50]

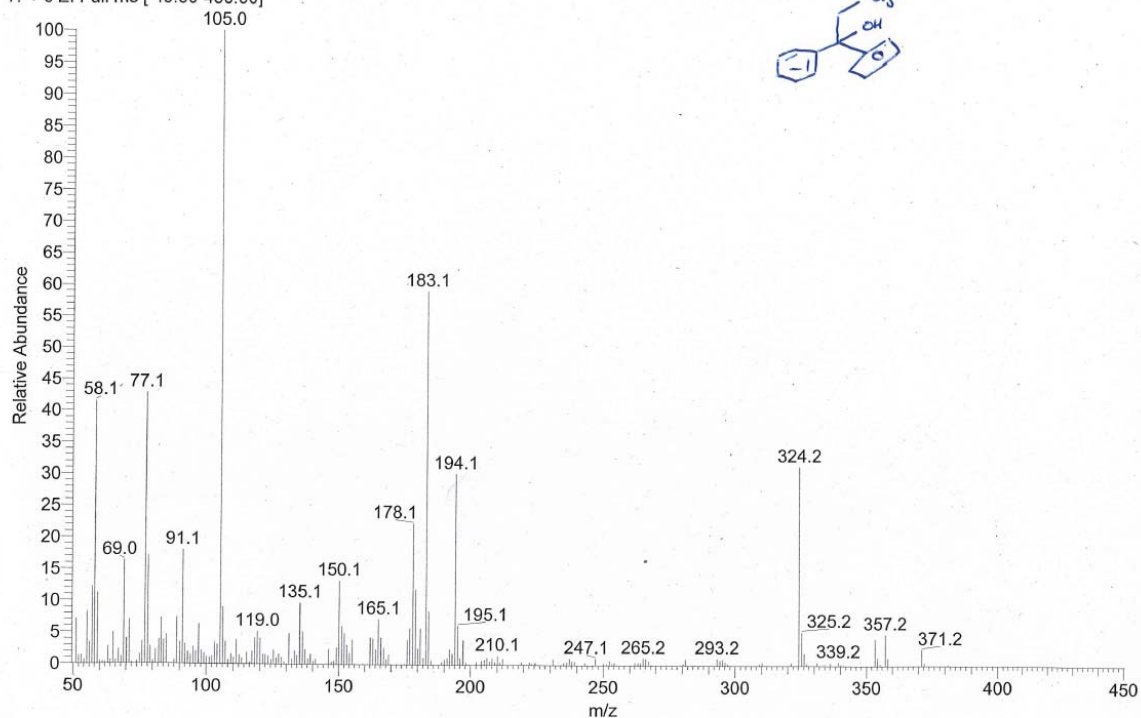

**Fig. S149**

EI-MS spectrum of 2-(pentafluoro- $\lambda^6$ -sulfaneyl)-1,1-diphenylethan-1-ol (**29**).

d:8215cc2-c6 #11 RT: 0.92 AV: 1 NL: 3.69E3  
T: + c EI Full ms [ 49.36-450.36]

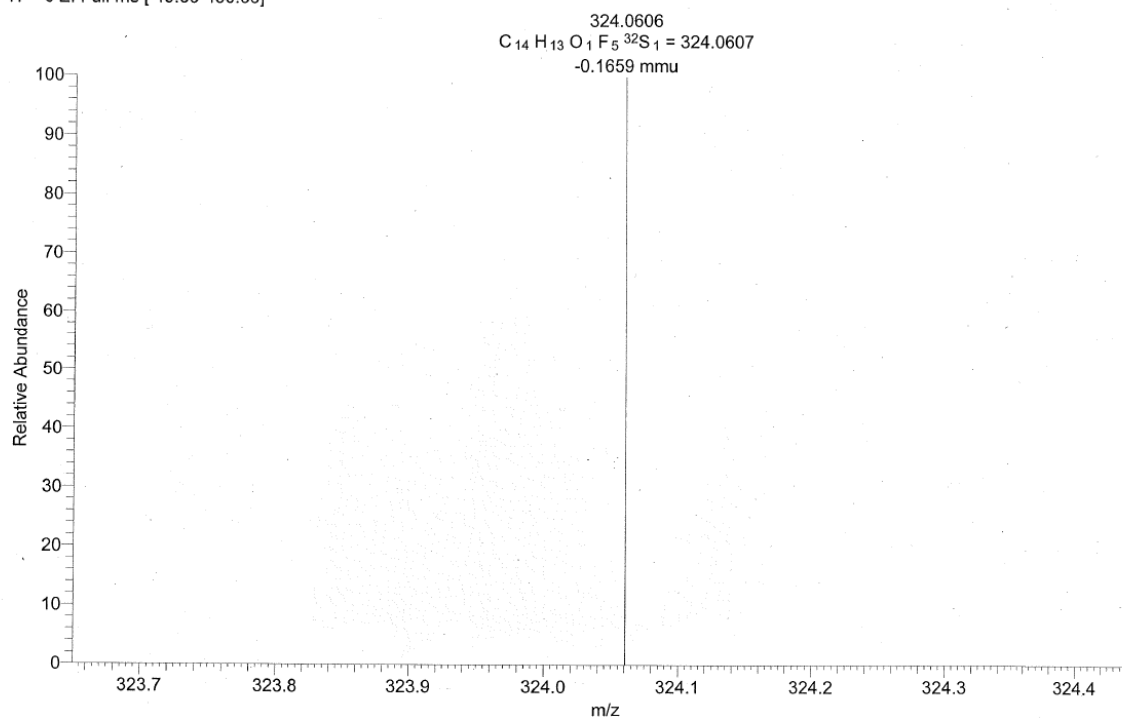

**Fig. S150**

HR-EI-MS spectrum of 2-(pentafluoro- $\lambda^6$ -sulfaneyl)-1,1-diphenylethan-1-ol (**29**).

MAT 95,+EI,Que 110,dir offen 8/1/2019 11:10:06 AM 20° DR-839-1-N3-CC1-F6-12 X best Ref: as  
moe D. Rombach AK Wagenknecht  
dr8391ei\_190801111006 #1-4 RT: 0.14-0.38 AV: 4 NL: 3.54E5  
T: + c EI Full ms [ 49.50-400.50] *sal, nichtartig*

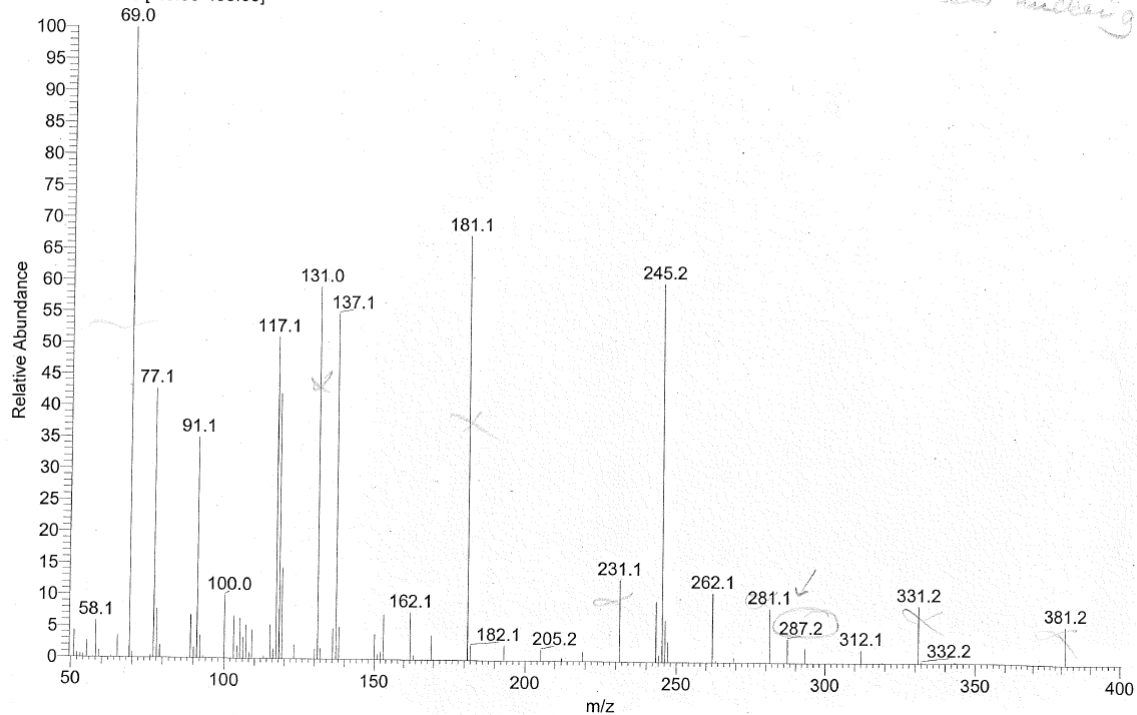

**Fig. S151**

EI-MS spectrum of (2-azido-2-phenylpropyl)pentafluoro- $\lambda^6$ -sulfane (**32**). Crossed peaks belong to reference gas.

dr8391ei\_190801111006-c2 #5 RT: 0.46 AV: 1 NL: 7.24E3  
T: + c EI Full ms [49.36-400.36]

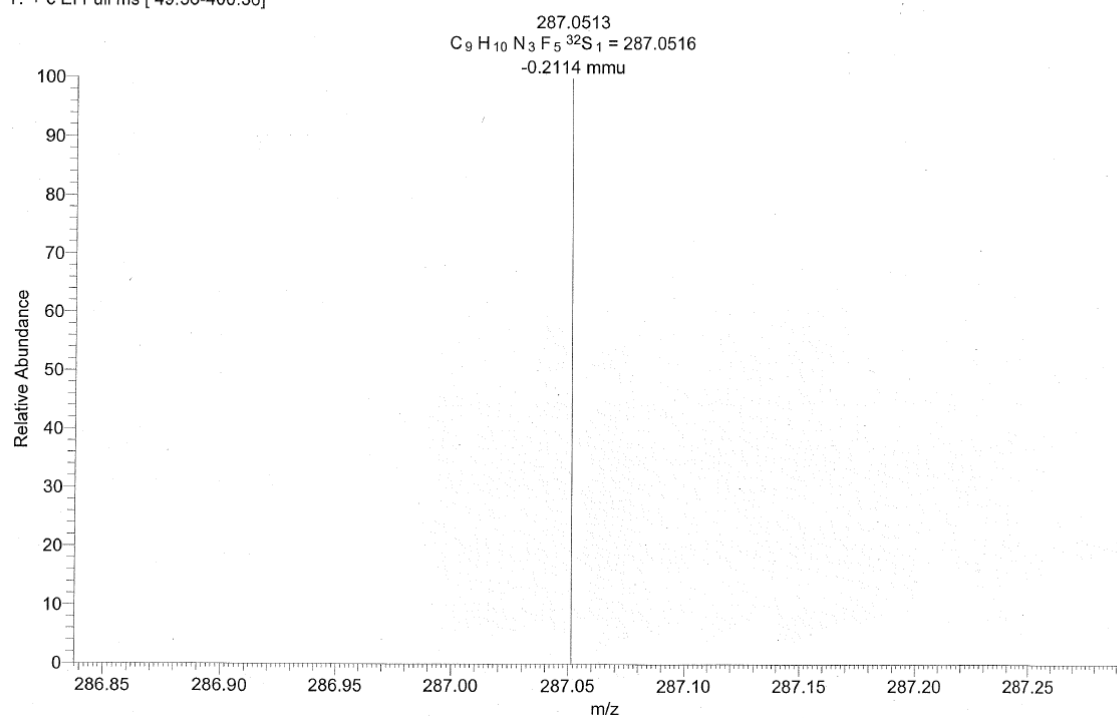

**Fig. S152**

EI-MS spectrum of (2-azido-2-phenylpropyl)pentafluoro- $\lambda^6$ -sulfane (**32**).



dr8391ei\_190801111006-c6 #5 RT: 0.46 AV: 1 NL: 1.24E5  
T: + c EI Full ms [ 49.39-400.39]

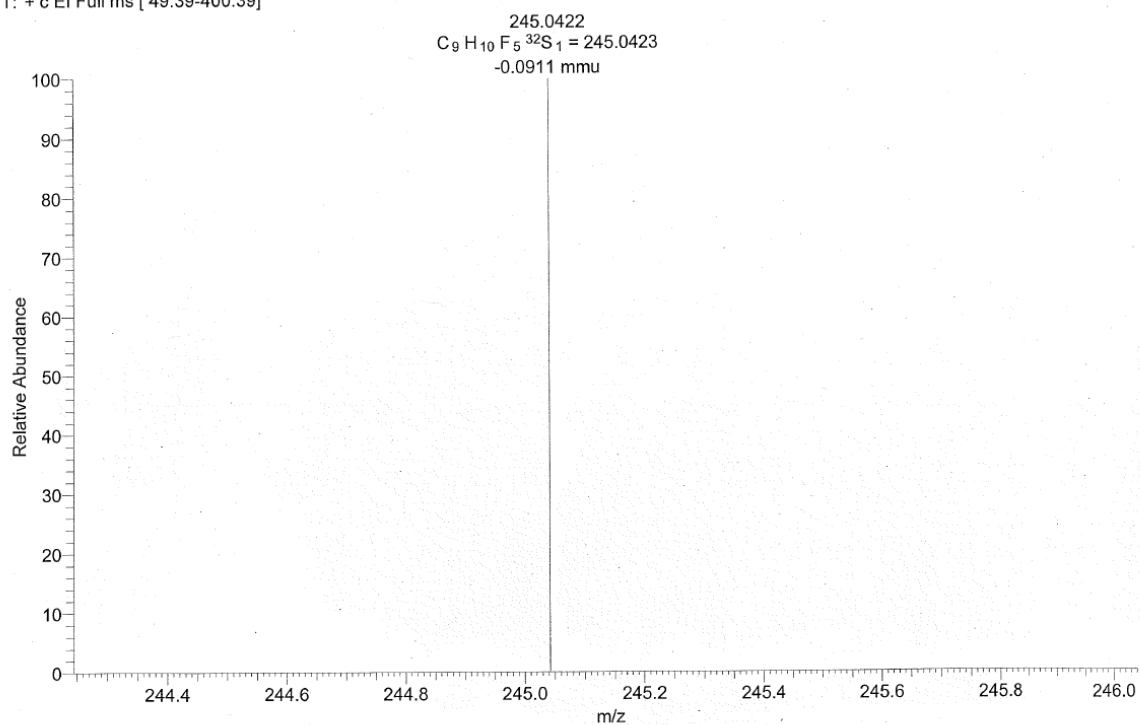

**Fig. S153**

EI-MS spectrum of (2-azido-2-phenylpropyl)pentafluoro- $\lambda^6$ -sulfane (**32**).

## Infrared spectroscopic characterisation

### Infrared spectroscopic characterisations of 8, 9 and 32.

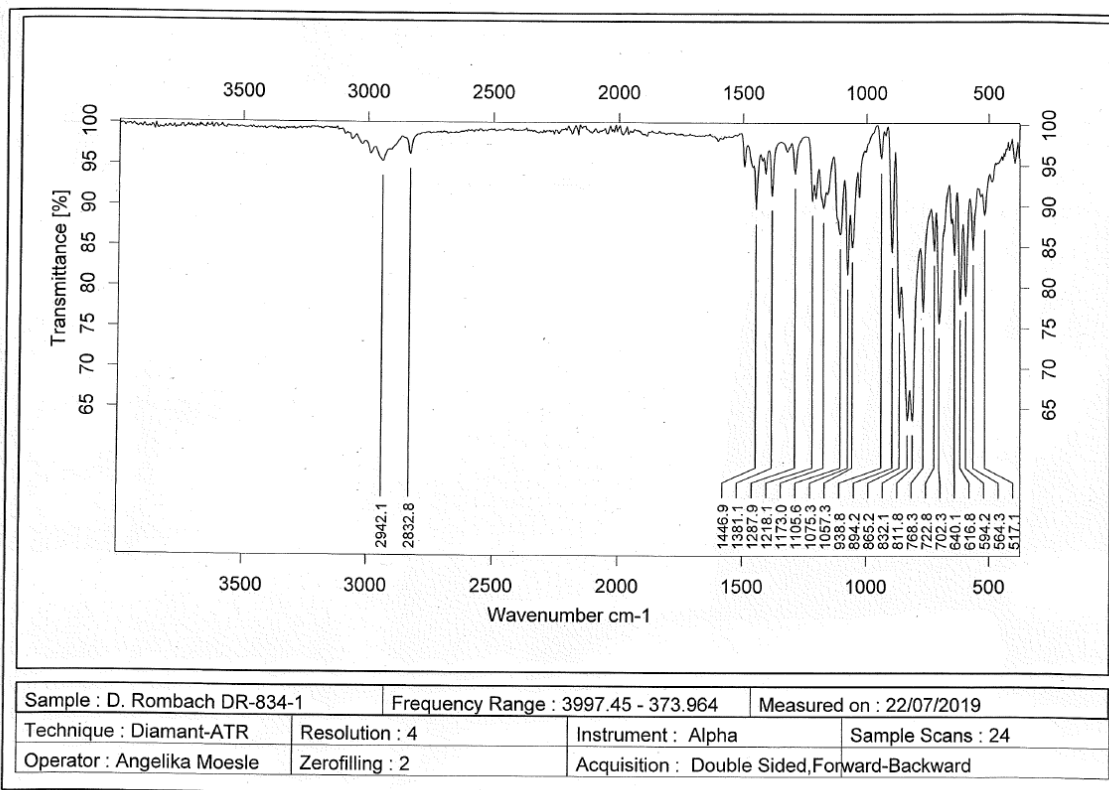

**Fig. S154**

FT-IR spectrum of pentafluoro(2-methoxy-2-phenylpropyl)- $\lambda^6$ -sulfane (**8**).

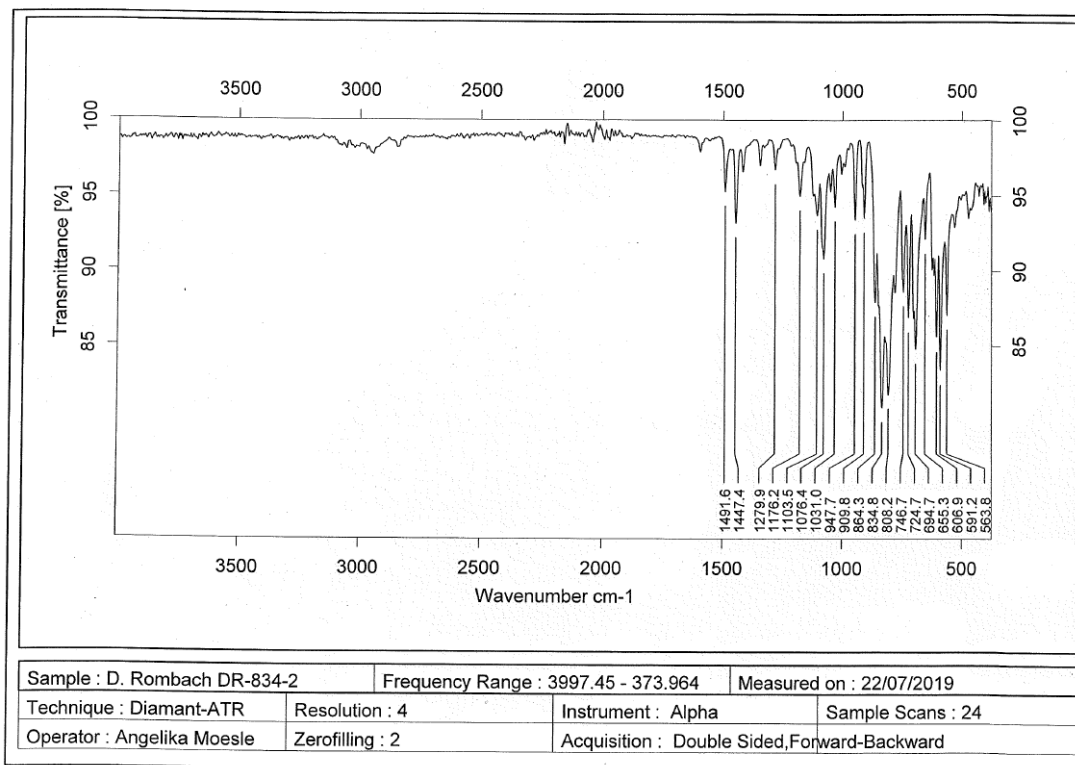

**Fig. S155**

FT-IR spectrum of pentafluoro(2-methoxy-2,2-diphenylethyl)- $\lambda^6$ -sulfane (**9**).

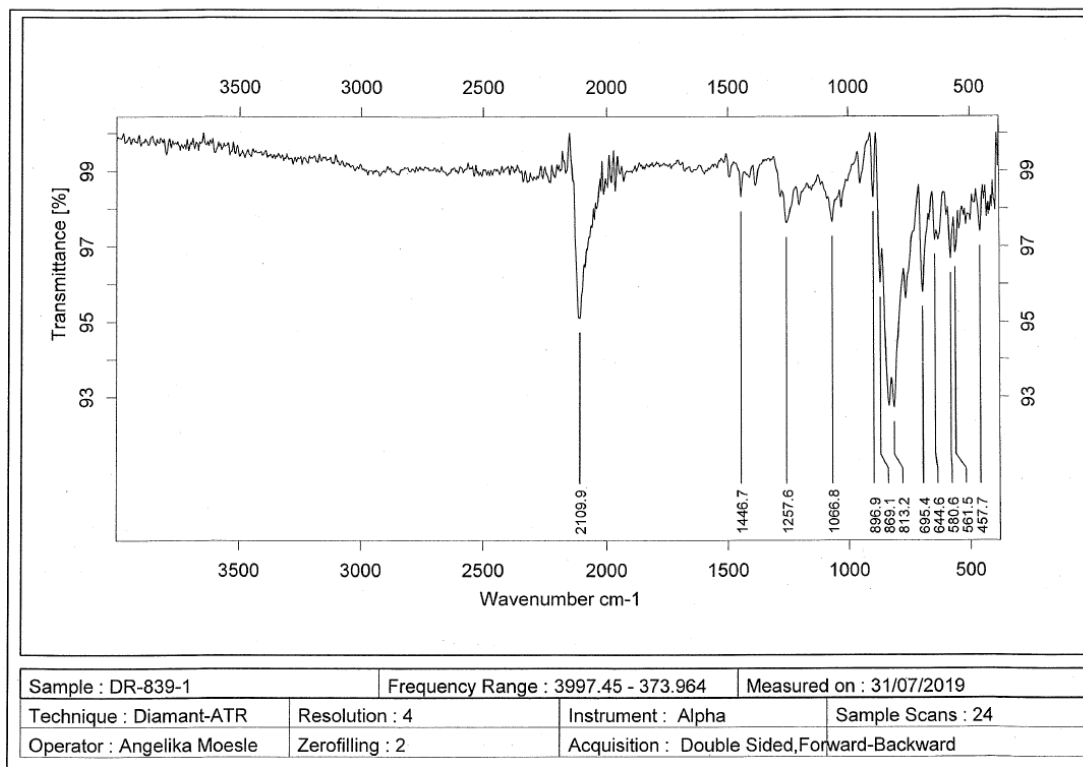

**Fig. S156**

FT-IR spectrum of (2-azido-2-phenylpropyl)pentafluoro- $\lambda^6$ -sulfane (**32**).

**XRD-data**

**XRD-data of 9**

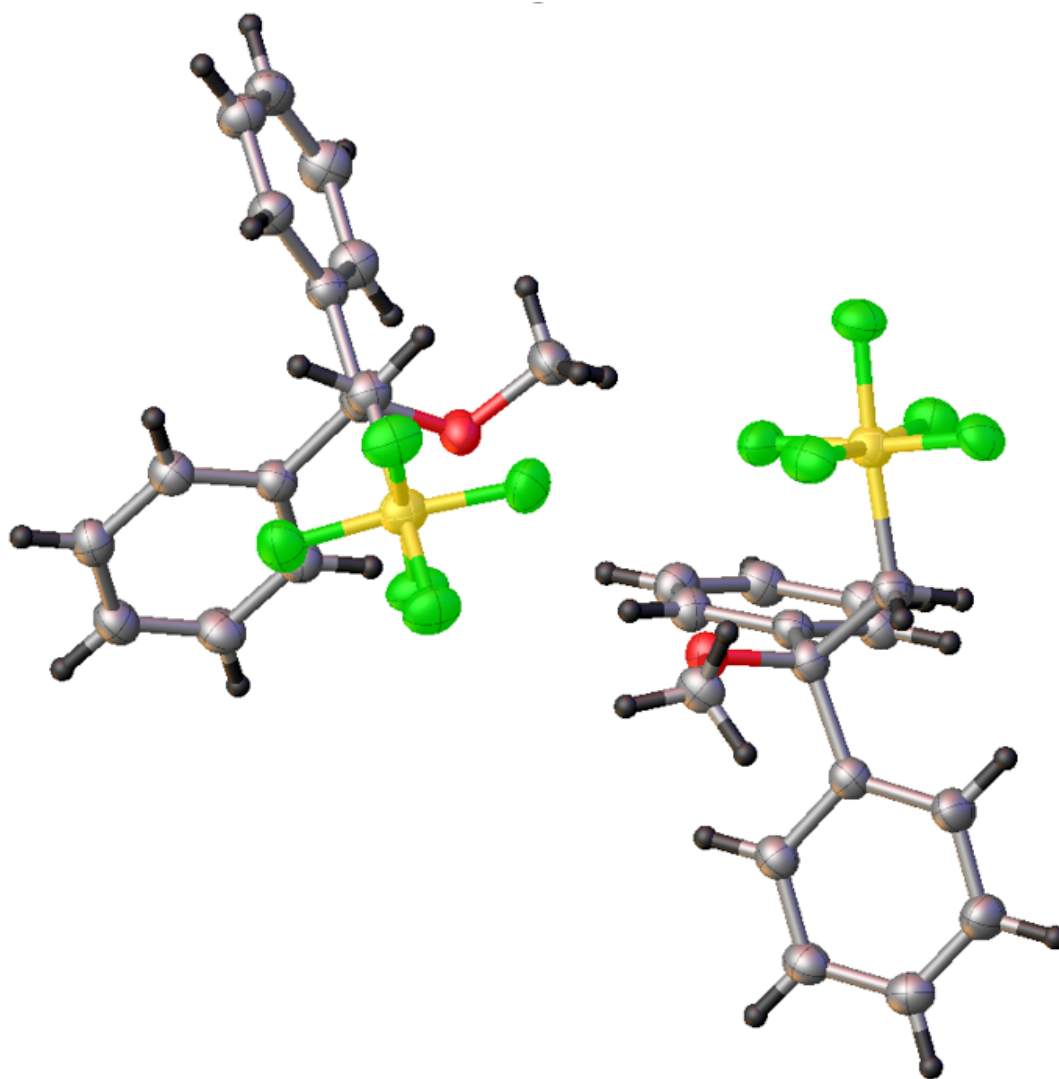

**Fig. S157**  
Plot of the XRD-structure of **9**.

| <b>Table 1 - Crystal data and structure refinement for 9.</b> |                                                               |
|---------------------------------------------------------------|---------------------------------------------------------------|
| Identification code                                           | 1948906                                                       |
| Empirical formula                                             | C <sub>15</sub> H <sub>15</sub> F <sub>5</sub> OS             |
| Formula weight                                                | 338.33                                                        |
| Temperature/K                                                 | 200                                                           |
| Crystal system                                                | monoclinic                                                    |
| Space group                                                   | P2 <sub>1</sub> /c                                            |
| a/Å                                                           | 9.865(2)                                                      |
| b/Å                                                           | 15.146(3)                                                     |
| c/Å                                                           | 19.988(4)                                                     |
| α/°                                                           | 90                                                            |
| β/°                                                           | 101.03(3)                                                     |
| γ/°                                                           | 90                                                            |
| Volume/Å <sup>3</sup>                                         | 2931.3(11)                                                    |
| Z                                                             | 8                                                             |
| ρ <sub>calc</sub> /cm <sup>3</sup>                            | 1.533                                                         |
| μ/mm <sup>-1</sup>                                            | 0.274                                                         |
| F(000)                                                        | 1392.0                                                        |
| Crystal size/mm <sup>3</sup>                                  | 0.8 × 0.2 × 0.1                                               |
| Radiation                                                     | MoKα (λ = 0.71073)                                            |
| 2θ range for data collection/°                                | 3.398 to 51.996                                               |
| Index ranges                                                  | -9 ≤ h ≤ 12, -16 ≤ k ≤ 18, -24 ≤ l ≤ 24                       |
| Reflections collected                                         | 15063                                                         |
| Independent reflections                                       | 5756 [R <sub>int</sub> = 0.0758, R <sub>sigma</sub> = 0.0605] |
| Data/restraints/parameters                                    | 5756/0/400                                                    |
| Goodness-of-fit on F <sup>2</sup>                             | 0.988                                                         |
| Final R indexes [I ≥ 2σ (I)]                                  | R <sub>1</sub> = 0.0603, wR <sub>2</sub> = 0.1541             |
| Final R indexes [all data]                                    | R <sub>1</sub> = 0.0954, wR <sub>2</sub> = 0.1811             |
| Largest diff. peak/hole / e Å <sup>-3</sup>                   | 0.42/-0.29                                                    |

**Table 2** - Fractional Atomic Coordinates ( $\times 10^4$ ) and Equivalent Isotropic Displacement Parameters ( $\text{\AA}^2 \times 10^3$ ) for **9**.  $U_{eq}$  is defined as 1/3 of of the trace of the orthogonalised  $U_{ij}$  tensor.

| Atom | x           | y          | z          | U(eq)    |
|------|-------------|------------|------------|----------|
| S1A  | 11024.0(8)  | 1625.0(6)  | 4112.0(4)  | 54.9(3)  |
| S1B  | 7163.0(8)   | 3940.8(6)  | 2317.3(4)  | 60.4(3)  |
| F1A  | 12542.4(18) | 1394.7(14) | 4504.8(11) | 66.2(5)  |
| F4A  | 10479(2)    | 731.0(14)  | 4381.1(10) | 68.0(5)  |
| F5A  | 11372(2)    | 1067.9(14) | 3492.8(10) | 71.2(6)  |
| F2A  | 11611(2)    | 2460.5(14) | 3786.9(11) | 72.7(6)  |
| O1A  | 9064(2)     | 3342.7(14) | 4323.3(11) | 52.2(5)  |
| F3A  | 9566.7(19)  | 1793.6(16) | 3669.8(10) | 70.7(6)  |
| F4B  | 8281(2)     | 4097.3(16) | 1855.5(11) | 76.1(6)  |
| F2B  | 6125(2)     | 3852.7(16) | 2818.8(11) | 76.8(6)  |
| F1B  | 8154(2)     | 3255.4(16) | 2762.1(11) | 76.9(6)  |
| F5B  | 7922(2)     | 4693.0(16) | 2804.3(11) | 77.7(6)  |
| O1B  | 5302(2)     | 2135.9(16) | 2463.8(11) | 56.5(6)  |
| F3B  | 6236(2)     | 4694.6(14) | 1915.3(11) | 76.8(6)  |
| C4A  | 8136(3)     | 2073(2)    | 4754.6(15) | 47.0(7)  |
| C10A | 9421(3)     | 3158(2)    | 5553.1(15) | 48.6(7)  |
| C10B | 3851(3)     | 3231(2)    | 1844.9(16) | 50.1(7)  |
| C5A  | 6979(3)     | 2221(2)    | 4245.5(15) | 51.0(7)  |
| C3B  | 5060(3)     | 2603(2)    | 1832.1(15) | 50.9(7)  |
| C4B  | 4616(3)     | 1954(2)    | 1235.1(15) | 51.2(7)  |
| C2A  | 10750(3)    | 2235(2)    | 4857.6(15) | 50.4(7)  |
| C3A  | 9363(3)     | 2708(2)    | 4855.9(15) | 47.8(7)  |
| C9A  | 8121(3)     | 1374(2)    | 5199.0(16) | 52.3(7)  |
| C1A  | 10030(3)    | 4050(2)    | 4341.6(18) | 56.5(8)  |
| C7A  | 5839(3)     | 967(2)     | 4626.8(18) | 56.2(8)  |
| C9B  | 4924(3)     | 2058(2)    | 592.5(16)  | 55.6(8)  |
| C2B  | 6371(3)     | 3094(2)    | 1717.3(16) | 54.1(8)  |
| C8A  | 6991(3)     | 813(2)     | 5134.6(17) | 53.9(8)  |
| C11A | 8356(3)     | 3750(2)    | 5605.9(17) | 53.8(8)  |
| C11B | 3419(3)     | 3807(2)    | 1307.1(17) | 54.8(8)  |
| C8B  | 4464(3)     | 1459(2)    | 78.9(18)   | 60.3(8)  |
| C15B | 3119(3)     | 3214(2)    | 2373.6(17) | 57.0(8)  |
| C6A  | 5840(3)     | 1661(2)    | 4191.1(17) | 56.9(8)  |
| C5B  | 3825(3)     | 1228(2)    | 1346.0(19) | 62.5(9)  |
| C13B | 1573(3)     | 4336(2)    | 1822.4(18) | 61.4(9)  |
| C1B  | 6329(3)     | 1453(2)    | 2539.7(18) | 63.9(9)  |
| C13A | 9283(4)     | 3993(2)    | 6784.5(18) | 60.4(8)  |
| C12A | 8291(3)     | 4161(2)    | 6208.5(17) | 58.4(8)  |
| C14A | 10318(4)    | 3407(3)    | 6743.8(18) | 63.8(9)  |
| C15A | 10395(3)    | 2995(3)    | 6135.5(17) | 60.6(9)  |
| C12B | 2302(3)     | 4359(2)    | 1296.1(17) | 58.6(8)  |
| C7B  | 3701(4)     | 739(2)     | 199.0(19)  | 64.1(9)  |
| C14B | 1987(3)     | 3764(3)    | 2365.3(19) | 65.4(9)  |
| C6B  | 3375(4)     | 623(3)     | 834(2)     | 69.8(10) |

| Atom | $U_{11}$ | $U_{22}$ | $U_{33}$ | $U_{23}$  | $U_{13}$ | $U_{12}$  |
|------|----------|----------|----------|-----------|----------|-----------|
| S1A  | 48.4(4)  | 57.3(5)  | 59.8(5)  | -2.7(4)   | 12.4(3)  | 2.9(4)    |
| S1B  | 50.2(5)  | 68.8(6)  | 61.6(5)  | -7.3(4)   | 9.0(4)   | -6.6(4)   |
| F1A  | 46.5(10) | 71.9(13) | 79.5(13) | -8.1(10)  | 10.3(9)  | 10.8(9)   |
| F4A  | 70.3(12) | 56.8(12) | 79.3(13) | -8.4(10)  | 20.1(10) | -9.8(9)   |
| F5A  | 67.3(12) | 76.9(15) | 72.8(13) | -15.5(11) | 21.7(10) | 7.6(10)   |
| F2A  | 87.9(14) | 65.0(14) | 73.8(13) | 3.3(10)   | 36.6(11) | -2.8(11)  |
| O1A  | 48.3(11) | 49.2(13) | 58.4(12) | 8.1(10)   | 8.9(9)   | -3.0(9)   |
| F3A  | 56.9(11) | 90.5(16) | 60.4(11) | -14.1(11) | 0.3(9)   | 15.9(10)  |
| F4B  | 57.5(11) | 93.7(17) | 80.4(14) | -15.1(12) | 21.5(10) | -23.9(11) |
| F2B  | 70.0(13) | 95.7(17) | 69.7(13) | -23.9(12) | 25.7(10) | -17.7(12) |
| F1B  | 67.4(12) | 86.4(16) | 68.7(13) | -0.5(11)  | -8.0(10) | 2.8(11)   |
| F5B  | 67.6(12) | 88.2(17) | 75.0(13) | -22.1(12) | 7.7(10)  | -17.9(11) |
| O1B  | 53.8(12) | 64.6(15) | 52.5(12) | 6.7(11)   | 14.0(9)  | 10.1(11)  |
| F3B  | 73.9(13) | 62.1(14) | 87.6(14) | -6.5(11)  | -1.5(11) | 1.0(11)   |
| C4A  | 42.8(15) | 46.4(17) | 52.0(16) | -3.0(13)  | 9.7(12)  | -0.5(13)  |
| C10A | 44.2(15) | 46.7(17) | 55.2(17) | 0.0(13)   | 10.1(13) | -2.3(13)  |
| C10B | 43.7(15) | 51.7(18) | 55.2(17) | -1.8(14)  | 10.3(13) | -0.6(13)  |
| C5A  | 42.9(15) | 55.2(19) | 55.9(17) | 2.4(14)   | 12.3(13) | -1.4(14)  |
| C3B  | 43.3(15) | 56.8(19) | 53.6(17) | 3.6(14)   | 11.7(12) | 1.9(14)   |
| C4B  | 42.8(15) | 55.4(19) | 55.5(18) | 0.0(14)   | 9.6(13)  | 1.8(14)   |
| C2A  | 41.6(15) | 54.0(19) | 54.9(17) | -0.9(14)  | 7.8(12)  | 3.2(13)   |
| C3A  | 41.3(15) | 47.3(17) | 54.4(17) | 3.9(13)   | 8.4(12)  | 0.9(13)   |
| C9A  | 46.6(16) | 51.0(18) | 60.0(18) | 1.0(15)   | 12.0(13) | 0.2(14)   |
| C1A  | 55.9(18) | 44.6(18) | 71(2)    | 2.2(15)   | 17.0(15) | -7.0(14)  |
| C7A  | 43.9(16) | 54.9(19) | 71(2)    | -6.4(16)  | 12.8(15) | -5.6(14)  |
| C9B  | 56.9(18) | 53.6(19) | 56.6(19) | -1.1(15)  | 11.2(14) | -6.5(15)  |
| C2B  | 43.8(15) | 60(2)    | 59.2(18) | -1.8(15)  | 12.3(13) | -4.1(14)  |
| C8A  | 48.4(16) | 49.2(18) | 67(2)    | 1.7(15)   | 18.2(14) | -4.0(14)  |
| C11A | 49.5(17) | 52.5(19) | 60.7(19) | 2.8(15)   | 13.9(14) | 3.2(14)   |
| C11B | 50.8(17) | 56(2)    | 59.7(18) | 1.3(15)   | 15.4(14) | -3.5(15)  |
| C8B  | 57.5(19) | 65(2)    | 58.3(19) | -6.8(16)  | 11.0(15) | -6.2(16)  |
| C15B | 53.3(17) | 61(2)    | 58.2(19) | 1.4(16)   | 15.3(14) | 1.5(15)   |
| C6A  | 42.5(16) | 68(2)    | 59.6(19) | -0.6(17)  | 8.2(14)  | -5.4(15)  |
| C5B  | 53.6(18) | 67(2)    | 68(2)    | -0.8(18)  | 15.4(16) | -11.6(17) |
| C13B | 51.6(18) | 60(2)    | 73(2)    | -2.1(17)  | 13.3(16) | 6.9(16)   |
| C1B  | 63(2)    | 64(2)    | 64(2)    | 4.3(17)   | 12.2(16) | 16.2(17)  |
| C13A | 66(2)    | 58(2)    | 59.7(19) | -6.7(16)  | 17.4(16) | -3.2(16)  |



|      |          |       |       |           |          |           |
|------|----------|-------|-------|-----------|----------|-----------|
| C12A | 58.2(18) | 57(2) | 64(2) | -1.4(16)  | 21.2(15) | 4.9(15)   |
| C14A | 57.1(19) | 72(2) | 59(2) | -6.9(17)  | 3.8(15)  | 3.0(17)   |
| C15A | 50.8(17) | 68(2) | 61(2) | -6.8(17)  | 5.2(14)  | 9.7(16)   |
| C12B | 53.9(18) | 55(2) | 65(2) | 4.0(16)   | 6.8(15)  | 2.2(15)   |
| C7B  | 57.7(19) | 58(2) | 74(2) | -11.1(17) | 6.7(17)  | -1.4(16)  |
| C14B | 56.8(19) | 72(2) | 73(2) | -2.3(19)  | 24.2(17) | 6.6(17)   |
| C6B  | 60(2)    | 69(2) | 81(2) | -2(2)     | 14.4(18) | -14.2(18) |

**Table 4 - Bond Lengths for 9.**

| Atom | Atom | Length/Å   |  | Atom | Atom | Length/Å |
|------|------|------------|--|------|------|----------|
| S1A  | F1A  | 1.5911(19) |  | C10B | C11B | 1.386(5) |
| S1A  | F4A  | 1.588(2)   |  | C10B | C15B | 1.390(4) |
| S1A  | F5A  | 1.589(2)   |  | C5A  | C6A  | 1.395(4) |
| S1A  | F2A  | 1.582(2)   |  | C3B  | C4B  | 1.544(4) |
| S1A  | F3A  | 1.558(2)   |  | C3B  | C2B  | 1.547(4) |
| S1A  | C2A  | 1.817(3)   |  | C4B  | C9B  | 1.384(4) |
| S1B  | F4B  | 1.586(2)   |  | C4B  | C5B  | 1.390(5) |
| S1B  | F2B  | 1.569(2)   |  | C2A  | C3A  | 1.544(4) |
| S1B  | F1B  | 1.578(2)   |  | C9A  | C8A  | 1.388(4) |
| S1B  | F5B  | 1.589(2)   |  | C7A  | C8A  | 1.391(4) |
| S1B  | F3B  | 1.583(2)   |  | C7A  | C6A  | 1.365(5) |
| S1B  | C2B  | 1.826(3)   |  | C9B  | C8B  | 1.379(4) |
| O1A  | C3A  | 1.423(4)   |  | C11A | C12A | 1.368(5) |
| O1A  | C1A  | 1.430(4)   |  | C11B | C12B | 1.380(5) |
| O1B  | C3B  | 1.427(4)   |  | C8B  | C7B  | 1.372(5) |
| O1B  | C1B  | 1.436(4)   |  | C15B | C14B | 1.391(5) |
| C4A  | C5A  | 1.394(4)   |  | C5B  | C6B  | 1.383(5) |
| C4A  | C3A  | 1.528(4)   |  | C13B | C12B | 1.383(5) |
| C4A  | C9A  | 1.385(4)   |  | C13B | C14B | 1.388(5) |
| C10A | C3A  | 1.543(4)   |  | C13A | C12A | 1.385(5) |
| C10A | C11A | 1.400(4)   |  | C13A | C14A | 1.366(5) |
| C10A | C15A | 1.383(4)   |  | C14A | C15A | 1.382(5) |
| C10B | C3B  | 1.529(4)   |  | C7B  | C6B  | 1.378(5) |

| Atom | Atom | Atom | Angle/°    |  | Atom | Atom | Atom | Angle/°  |
|------|------|------|------------|--|------|------|------|----------|
| F1A  | S1A  | C2A  | 88.87(12)  |  | C11B | C10B | C15B | 118.3(3) |
| F4A  | S1A  | F1A  | 89.64(12)  |  | C15B | C10B | C3B  | 121.4(3) |
| F4A  | S1A  | F5A  | 87.06(12)  |  | C4A  | C5A  | C6A  | 119.6(3) |
| F4A  | S1A  | C2A  | 92.46(13)  |  | O1B  | C3B  | C10B | 107.0(2) |
| F5A  | S1A  | F1A  | 86.83(11)  |  | O1B  | C3B  | C4B  | 110.1(3) |
| F5A  | S1A  | C2A  | 175.68(13) |  | O1B  | C3B  | C2B  | 111.5(2) |
| F2A  | S1A  | F1A  | 89.66(12)  |  | C10B | C3B  | C4B  | 107.6(2) |
| F2A  | S1A  | F4A  | 174.42(13) |  | C10B | C3B  | C2B  | 112.3(3) |
| F2A  | S1A  | F5A  | 87.37(12)  |  | C4B  | C3B  | C2B  | 108.3(2) |
| F2A  | S1A  | C2A  | 93.06(14)  |  | C9B  | C4B  | C3B  | 124.4(3) |
| F3A  | S1A  | F1A  | 174.45(12) |  | C9B  | C4B  | C5B  | 117.9(3) |
| F3A  | S1A  | F4A  | 89.80(12)  |  | C5B  | C4B  | C3B  | 117.7(3) |
| F3A  | S1A  | F5A  | 87.63(11)  |  | C3A  | C2A  | S1A  | 120.3(2) |
| F3A  | S1A  | F2A  | 90.36(13)  |  | O1A  | C3A  | C4A  | 106.2(2) |
| F3A  | S1A  | C2A  | 96.67(12)  |  | O1A  | C3A  | C10A | 110.1(3) |
| F4B  | S1B  | F5B  | 87.19(12)  |  | O1A  | C3A  | C2A  | 111.8(2) |
| F4B  | S1B  | C2B  | 88.87(13)  |  | C4A  | C3A  | C10A | 106.8(2) |
| F2B  | S1B  | F4B  | 174.78(13) |  | C4A  | C3A  | C2A  | 112.9(3) |
| F2B  | S1B  | F1B  | 89.65(13)  |  | C10A | C3A  | C2A  | 108.9(2) |
| F2B  | S1B  | F5B  | 87.59(12)  |  | C4A  | C9A  | C8A  | 121.1(3) |
| F2B  | S1B  | F3B  | 90.07(13)  |  | C6A  | C7A  | C8A  | 119.6(3) |
| F2B  | S1B  | C2B  | 96.35(13)  |  | C8B  | C9B  | C4B  | 121.1(3) |
| F1B  | S1B  | F4B  | 90.08(13)  |  | C3B  | C2B  | S1B  | 120.3(2) |
| F1B  | S1B  | F5B  | 87.61(13)  |  | C9A  | C8A  | C7A  | 119.6(3) |
| F1B  | S1B  | F3B  | 174.89(13) |  | C12A | C11A | C10A | 121.3(3) |
| F1B  | S1B  | C2B  | 92.82(15)  |  | C12B | C11B | C10B | 121.3(3) |
| F5B  | S1B  | C2B  | 176.04(13) |  | C7B  | C8B  | C9B  | 120.3(3) |
| F3B  | S1B  | F4B  | 89.74(14)  |  | C10B | C15B | C14B | 120.9(3) |
| F3B  | S1B  | F5B  | 87.28(13)  |  | C7A  | C6A  | C5A  | 121.2(3) |
| F3B  | S1B  | C2B  | 92.28(14)  |  | C6B  | C5B  | C4B  | 121.1(3) |
| C3A  | O1A  | C1A  | 116.4(2)   |  | C12B | C13B | C14B | 119.5(3) |
| C3B  | O1B  | C1B  | 116.5(2)   |  | C14A | C13A | C12A | 119.1(3) |
| C5A  | C4A  | C3A  | 120.9(3)   |  | C11A | C12A | C13A | 120.2(3) |
| C9A  | C4A  | C5A  | 118.9(3)   |  | C13A | C14A | C15A | 120.9(3) |
| C9A  | C4A  | C3A  | 120.1(3)   |  | C14A | C15A | C10A | 120.9(3) |
| C11A | C10A | C3A  | 116.9(3)   |  | C11B | C12B | C13B | 120.2(3) |
| C15A | C10A | C3A  | 125.5(3)   |  | C8B  | C7B  | C6B  | 119.6(3) |
| C15A | C10A | C11A | 117.5(3)   |  | C13B | C14B | C15B | 119.9(3) |
| C11B | C10B | C3B  | 120.2(3)   |  | C7B  | C6B  | C5B  | 119.9(3) |

**Table 6** - Hydrogen Atom Coordinates ( $\text{\AA}\times 10^4$ ) and Isotropic Displacement Parameters ( $\text{\AA}^2\times 10^3$ ) for **9**.

| Atom | x        | y       | z       | U(eq) |
|------|----------|---------|---------|-------|
| H5A  | 6966.44  | 2700.05 | 3937.5  | 61    |
| H2AA | 10900.93 | 1819.05 | 5246.58 | 60    |
| H2AB | 11486.63 | 2687.4  | 4956.12 | 60    |
| H9A  | 8896.39  | 1276.16 | 5553.71 | 63    |
| H1AA | 9589.04  | 4541.89 | 4063.26 | 85    |
| H1AB | 10830.91 | 3845.13 | 4160.85 | 85    |
| H1AC | 10332.57 | 4248.93 | 4813.17 | 85    |
| H7A  | 5056.14  | 590.98  | 4583.17 | 67    |
| H9B  | 5460.41  | 2549.2  | 503.66  | 67    |
| H2BA | 6147.54  | 3373.81 | 1261.72 | 65    |
| H2BB | 7085.98  | 2642.18 | 1695.2  | 65    |
| H8A  | 7003.55  | 326.29  | 5435.79 | 65    |
| H11A | 7665.86  | 3869.33 | 5215.34 | 65    |
| H11B | 3900.77  | 3821.33 | 938.77  | 66    |
| H8B  | 4677.1   | 1546.23 | -360.2  | 72    |
| H15B | 3395.08  | 2821.54 | 2745.44 | 68    |
| H6A  | 5051.99  | 1764.52 | 3844.84 | 68    |
| H5B  | 3589.91  | 1146.76 | 1781.06 | 75    |
| H13B | 796.03   | 4709.81 | 1812.29 | 74    |
| H1BA | 6237.94  | 1119.84 | 2113.01 | 96    |
| H1BB | 6200.46  | 1053.8  | 2908.33 | 96    |
| H1BC | 7250.93  | 1718.74 | 2649.43 | 96    |
| H13A | 9245.14  | 4280.92 | 7202.67 | 73    |
| H12A | 7561.63  | 4562.23 | 6231.96 | 70    |
| H14A | 10993.22 | 3281.86 | 7138.97 | 77    |
| H15A | 11127.47 | 2593.35 | 6117.24 | 73    |
| H12B | 2032.97  | 4755.39 | 926.24  | 70    |
| H7B  | 3398.43  | 322.97  | -153.52 | 77    |
| H14B | 1497.59  | 3747.89 | 2730.79 | 78    |
| H6B  | 2842.15  | 127.97  | 918.88  | 84    |

**Crystal Data** for C<sub>15</sub>H<sub>15</sub>F<sub>5</sub>OS (*M* = 338.33 g/mol)

Monoclinic, space group P2<sub>1</sub>/c (no. 14), *a* = 9.865(2) Å, *b* = 15.146(3) Å, *c* = 19.988(4) Å,  $\beta$  = 101.03(3)°, *V* = 2931.3(11) Å<sup>3</sup>, *Z* = 8, *T* = 200 K,  $\mu(\text{MoK}\alpha)$  = 0.274 mm<sup>-1</sup>, *D*<sub>calc</sub> = 1.533 g/cm<sup>3</sup>, 15063 reflections measured (3.398° ≤ 2 $\theta$  ≤ 51.996°), 5756 unique (*R*<sub>int</sub> = 0.0758, *R*<sub>sigma</sub> = 0.0605) which were used in all calculations. The final *R*<sub>1</sub> was 0.0603 (*I* > 2 $\sigma$ (*I*)) and *wR*<sub>2</sub> was 0.1811 (all data).

**Refinement model description**

Number of restraints - 0, number of constraints - unknown.

Details:

1. Fixed Uiso

At 1.2 times of:

All C(H) groups, All C(H,H) groups

At 1.5 times of:

All C(H,H,H) groups

2. *2.a Secondary CH2 refined with riding coordinates:*

C2A(H2AA,H2AB), C2B(H2BA,H2BB)

*2.b Aromatic/amide H refined with riding coordinates:*

C5A(H5A), C9A(H9A), C7A(H7A), C9B(H9B), C8A(H8A), C11A(H11A),  
C11B(H11B),

C8B(H8B), C15B(H15B), C6A(H6A), C5B(H5B), C13B(H13B), C13A(H13A),  
C12A(H12A),

C14A(H14A), C15A(H15A), C12B(H12B), C7B(H7B), C14B(H14B), C6B(H6B)

*2.c Idealised Me refined as rotating group:*

C1A(H1AA,H1AB,H1AC), C1B(H1BA,H1BB,H1BC)

## Stability measurements of 8 and 9

### DSC-Measurements of 8 and 9

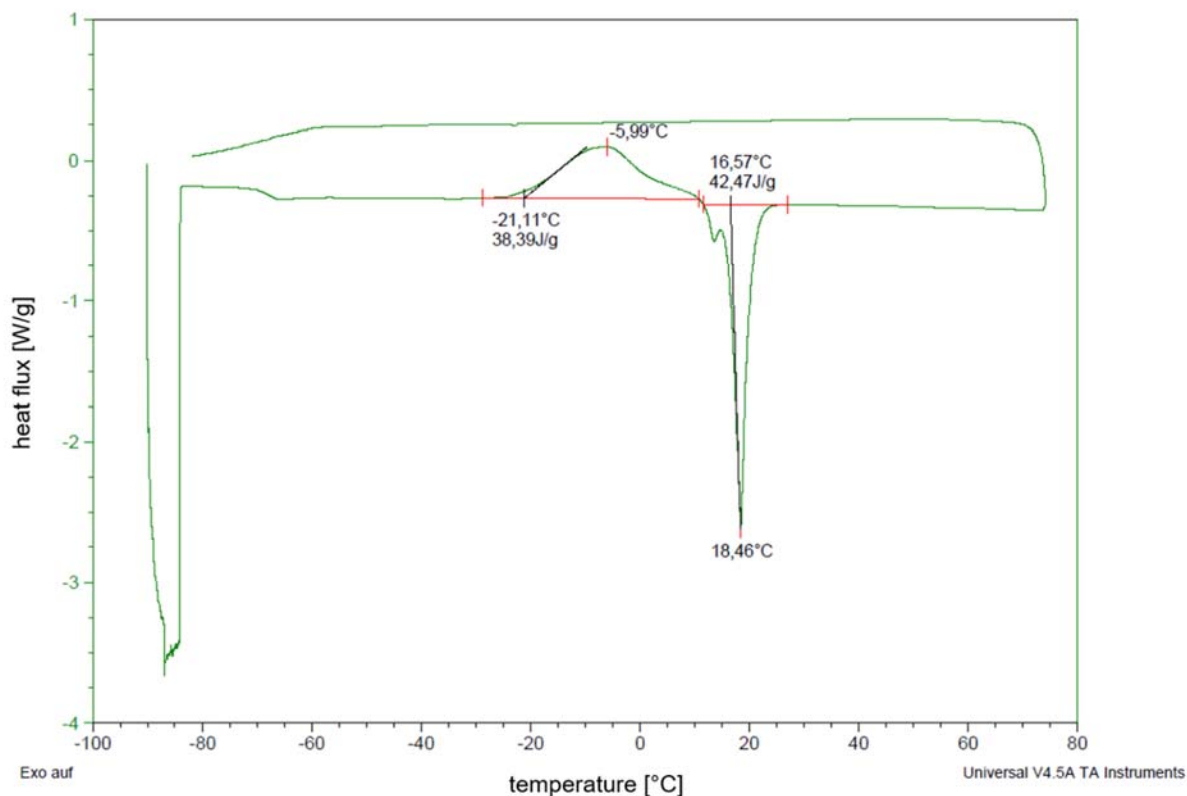

**Fig. S158**

DSC measurement of **8** in the range of -90°C – 70°C. The feature at -6°C could not be assigned. However, the assignment to a decomposition reaction was excluded due to the storability of the neat liquid **8** without any indication of decomposition at 2°C in the fridge over weeks or for hours at ambient temperature. Further a solution of the product could be heated to 75°C for 60 min under air without any sign of decomposition.

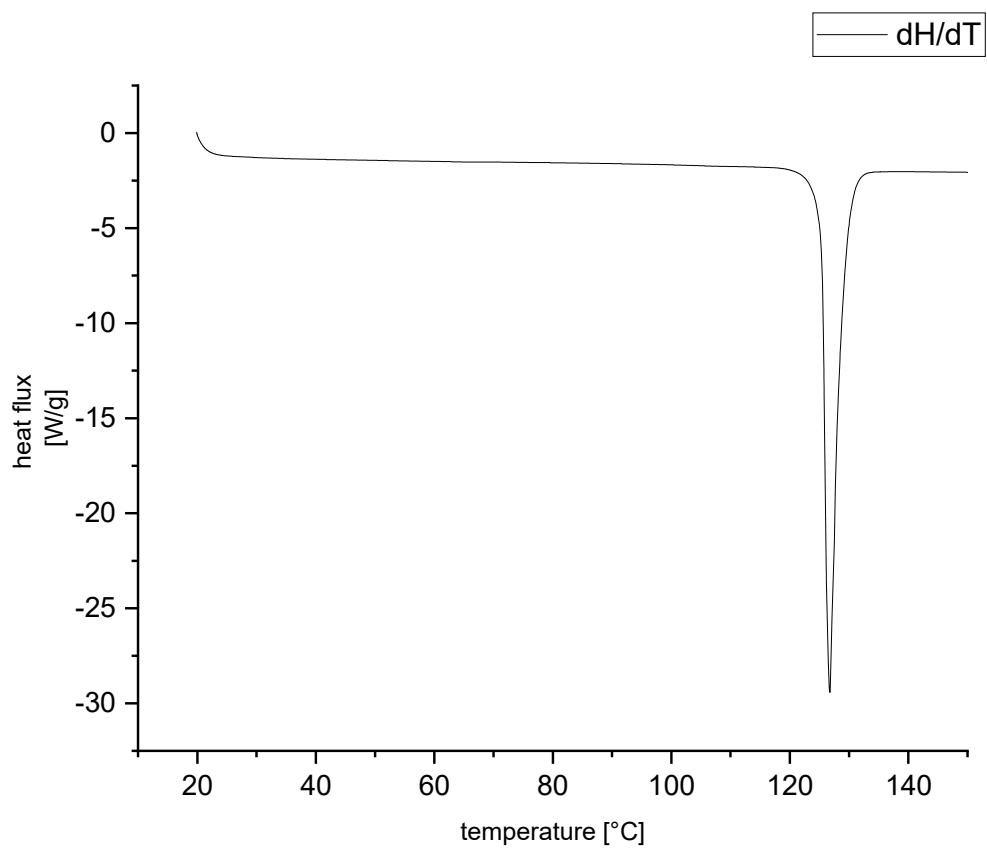

**Fig. S159**

DSC measurement of **9** in the range of 20  $^{\circ}\text{C}$  – 150  $^{\circ}\text{C}$ .

Probe: Dr-834-2-DPE\_1  
Größe: 5,2000 mg  
Methode: Dr-834-2-DPE

DSC

Datei: C:\...Messungen\David\Dr-834-2-DPE\_1.002  
Bediener: MR  
Versuchsdatum: 19-Sep-2019 11:40  
Gerät: DSC Q200 V24.11 Build 124

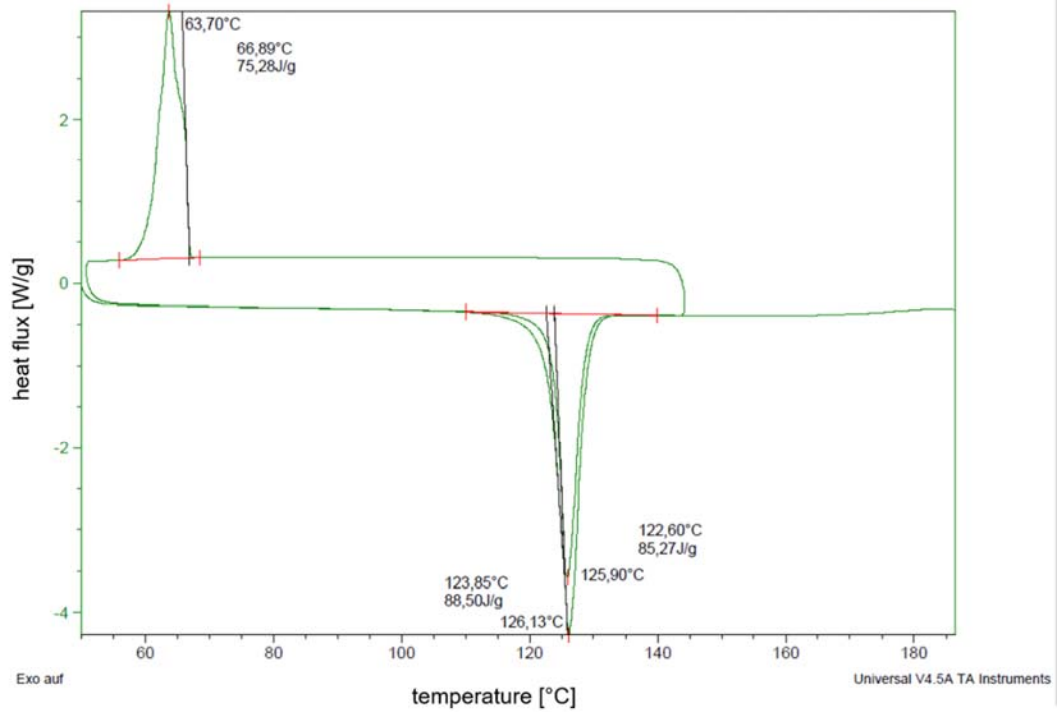

**Fig. S160**

DSC reversibility measurement of **9** in the range of 20°C – 150°C and final heating to 190°C.

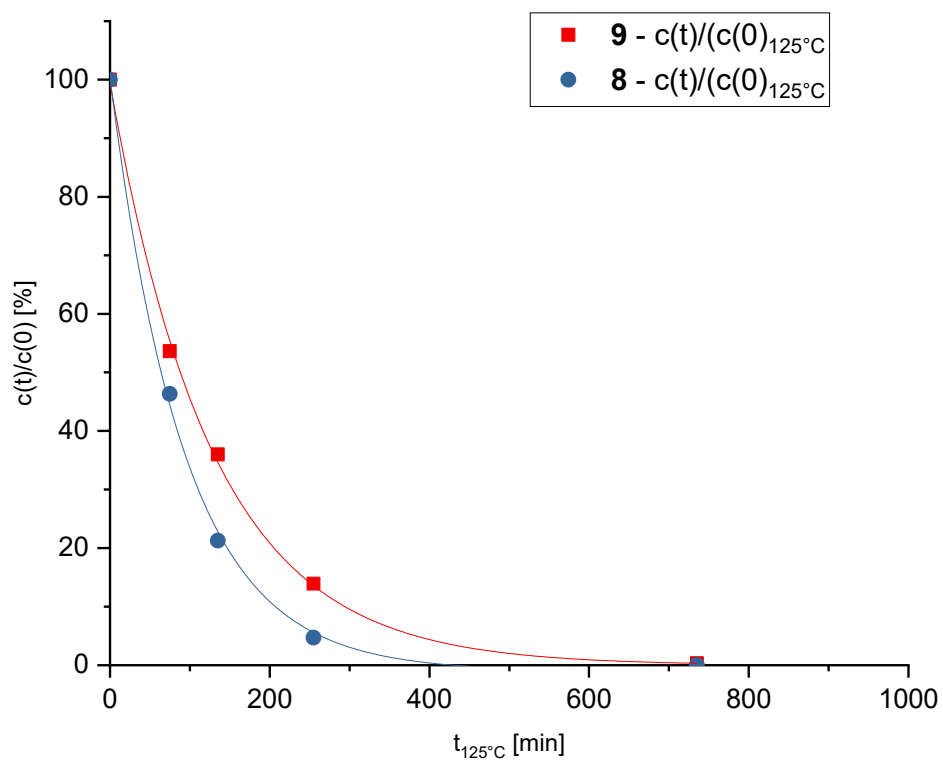

**Fig. S161**

Kinetics of the degradation of **8** and **9** under heating (125°C in DMSO) under ambient atmosphere.



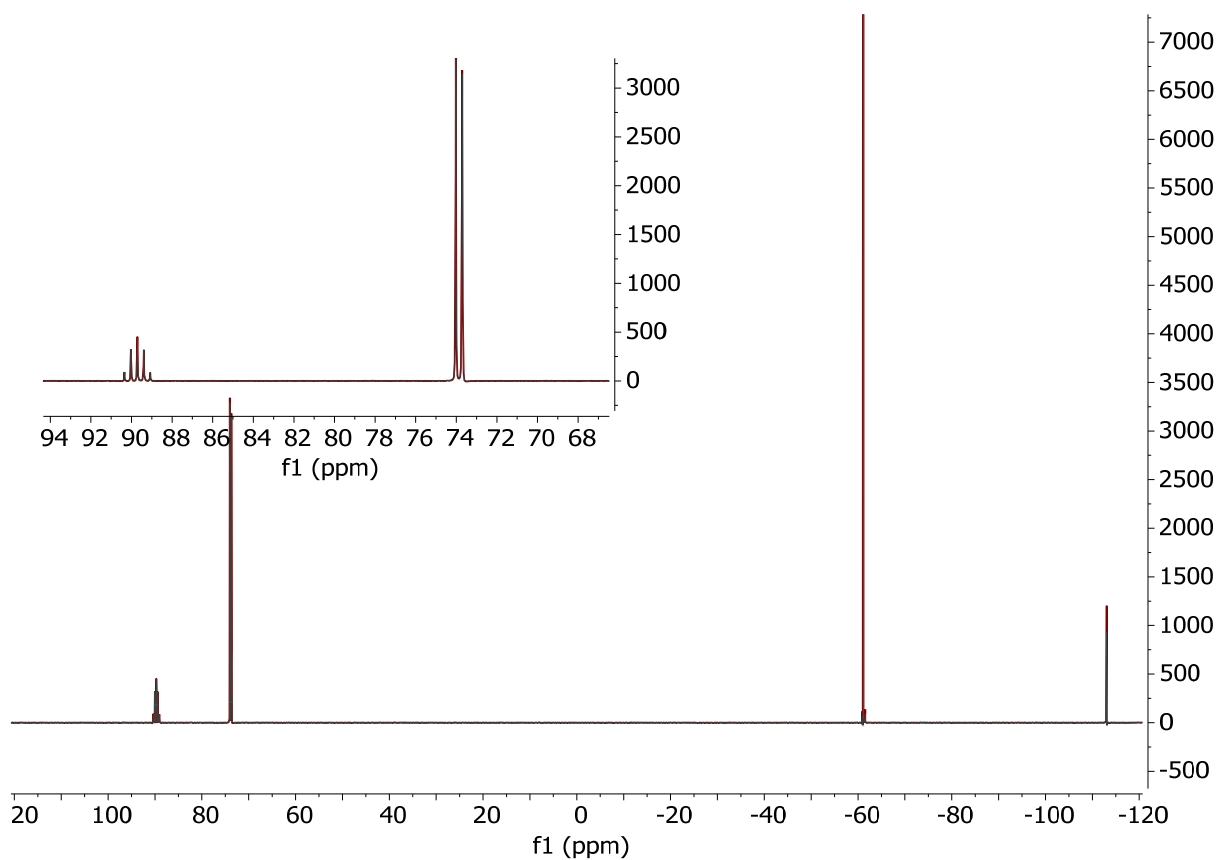

**Fig. S162**

$^{19}\text{F}$ -NMR investigation of photostability of a solution of **9** (24 mM in DMSO) over 15h under irradiation at 365 nm at 20°C under air. Red:  $^{19}\text{F}$ -NMR spectrum at  $t = 0$ . Green:  $^{19}\text{F}$ -NMR Spectrum at  $t = 15\text{h}$ . Benzotrifluoride as well as fluorobenzene have been added as internal standard.

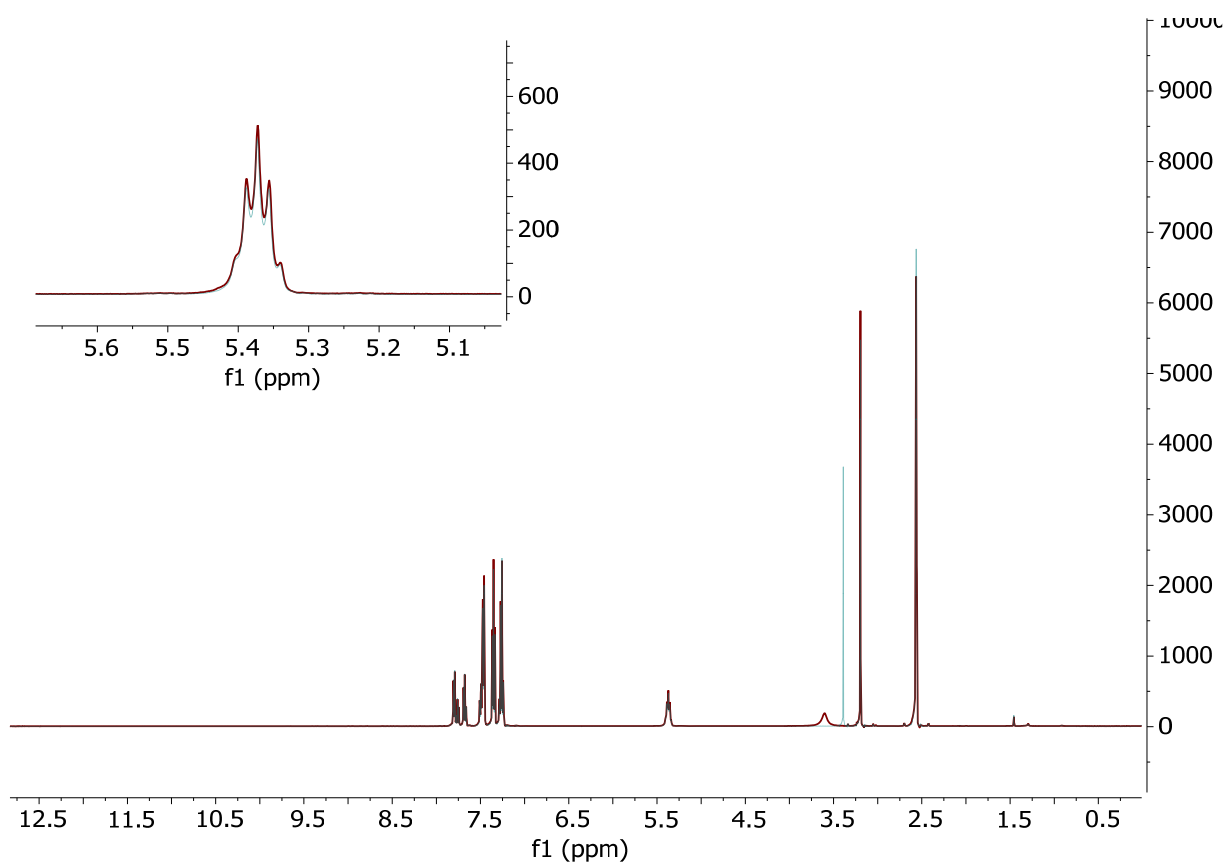

**Fig. S163**

<sup>1</sup>H-NMR investigation of photostability of a solution of **9** (24 mM in DMSO) over 62h under irradiation at 365 nm at 20°C under air. Green: <sup>1</sup>H-NMR Spectrum at t = 62h. Red: <sup>1</sup>H-NMR spectrum at t = 0. Benzotrifluoride as well as fluorobenzene have been added as internal standard.

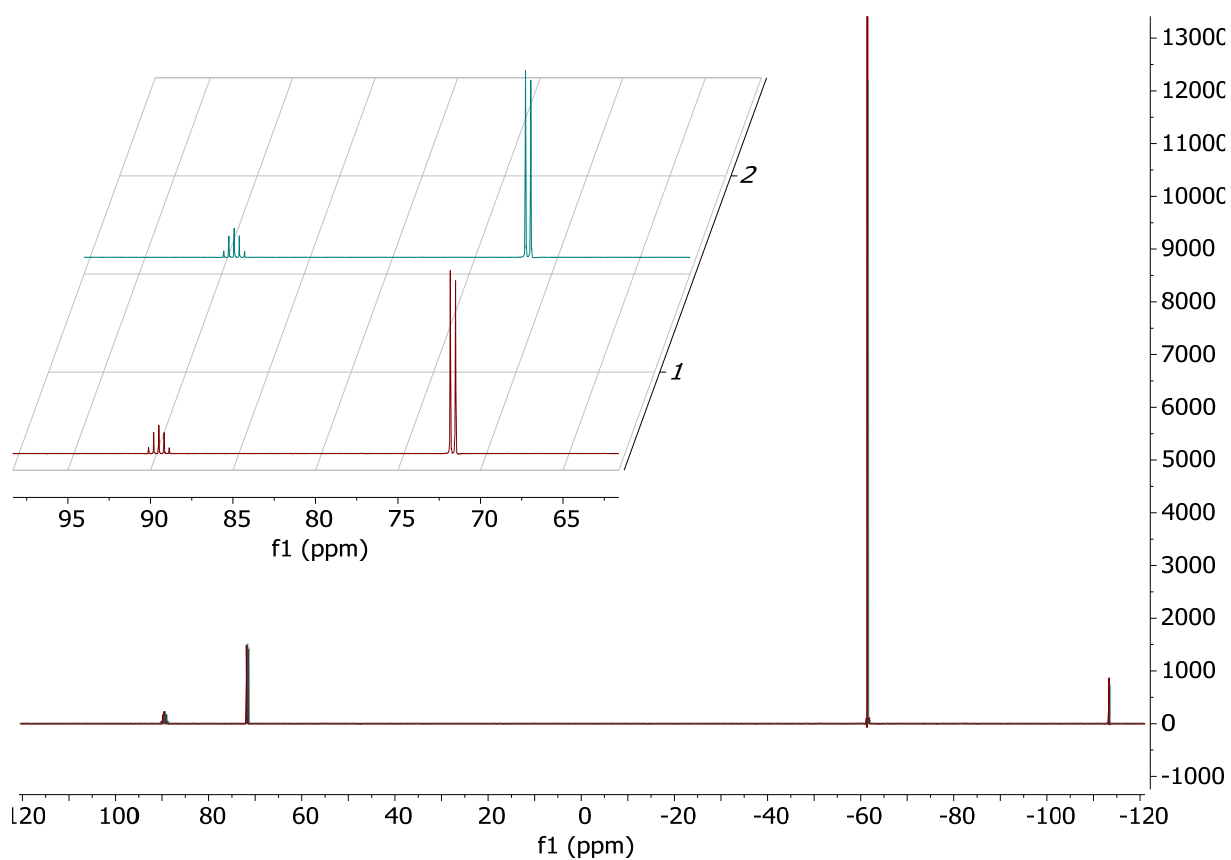

**Fig. S164**

$^{19}\text{F}$ -NMR investigation of photostability of a solution of **8** (24 mM in DMSO) after 15h under irradiation at 365 nm at 20°C under air. Red:  $^{19}\text{F}$ -NMR spectrum at  $t = 0$ . Green:  $^{19}\text{F}$ -NMR Spectrum at  $t = 15\text{h}$ . Benzotrifluoride as well as fluorobenzene have been added as internal standard.

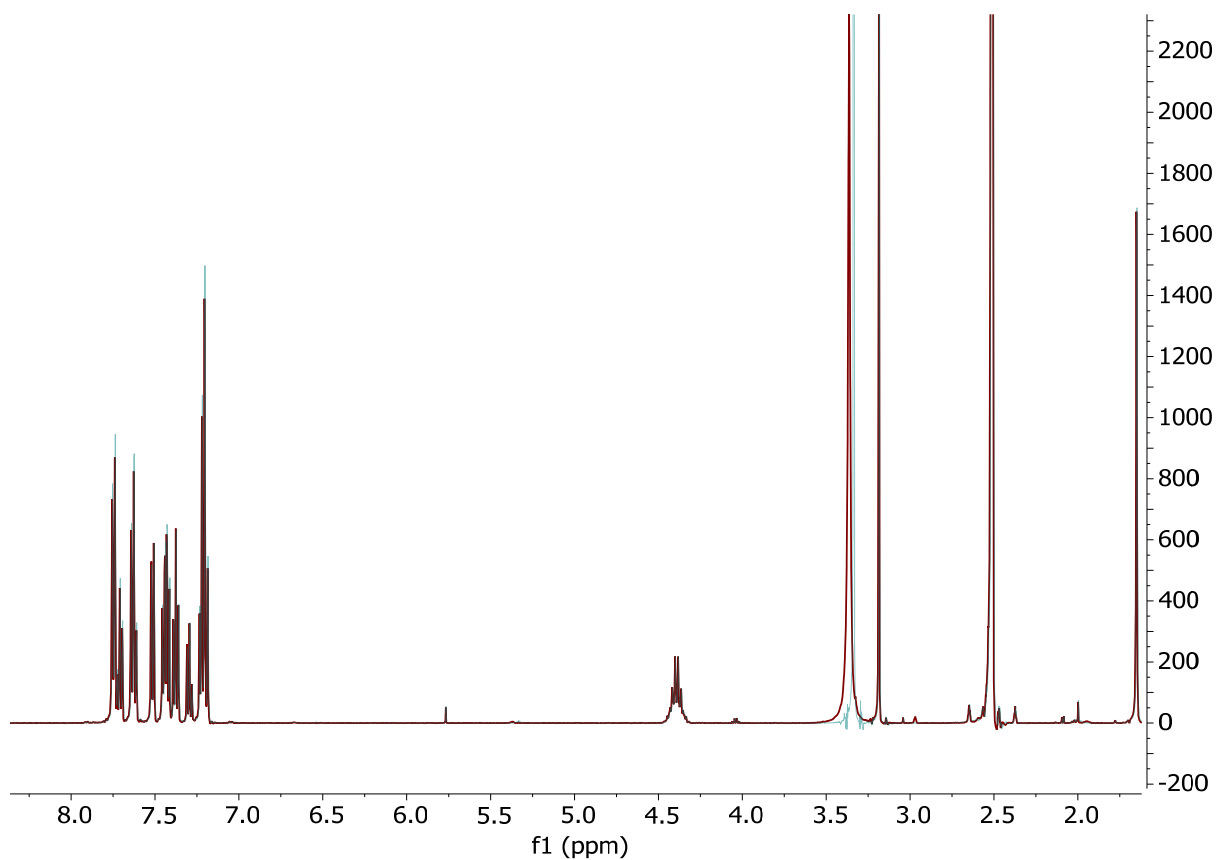

**Fig. S165**

<sup>1</sup>H-NMR investigation of photostability of a solution of **8** (24 mM in DMSO) over 62h under irradiation at 365 nm at 20°C. Red: <sup>1</sup>H-NMR spectrum at t = 0. Green: <sup>1</sup>H-NMR Spectrum at t = 62h. Benzotrifluoride as well as fluorobenzene have been added as internal standard.

### Two-step reaction procedure

While investigating the alkoxylation reaction we also investigated the idea of a two-step access to the compounds **8** and **9**. Therefore the addition products **4** and **5** have been prepared according to the previously reported procedure.<sup>[S7]</sup> The products have been subjected to the reaction with different alkoxy salts in THF-d<sup>8</sup> as well as to BEt<sub>3</sub> in the presence of MeOH in MeCN-d<sup>3</sup>

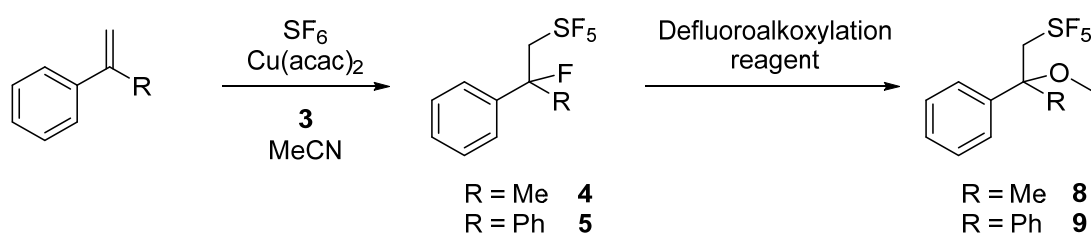

### General reaction using metal methoxide and substrate **4**:

In a borosilicate NMR tube 100  $\mu\text{mol}$  (38.9 eq., 196 mM) of the metal hydride was suspended in 350  $\mu\text{L}$  THF-d<sup>8</sup>. Then 10  $\mu\text{L}$  (246  $\mu\text{mol}$ , 95.7 eq., 482 mM) of anhydrous MeOH were added to the reaction vessel and the mixture was vigorously shaken for 1 min while hydrogen evolution was observed. After 5 min 150  $\mu\text{L}$  (2.57  $\mu\text{mol}$ , 5.03 mM, 1.00 eq.) of a stock solution of **4** (17.1 mM in pentanes) were added to the reaction mixture. In case of CaH<sub>2</sub> the base was reacted for 18 h under inert conditions with the MeOH before the substrate was added to ensure the kinetically hampered formation of the alcoholate. The reaction mixture was vigorously shaken for 1 min and then monitored by <sup>1</sup>H and <sup>19</sup>F-NMR.

### Procedure using triethylborane and substrate **4**:

In a borosilicate NMR tube 150  $\mu\text{L}$  (2.57  $\mu\text{mol}$ , 4.85 mM, 1.00 eq.) of a stock solution of **4** (17.1 mM in pentanes) have been suspended in 350  $\mu\text{L}$  MeCN-d<sup>3</sup>. Then 10  $\mu\text{L}$

(246  $\mu\text{mol}$ , 95.7 eq., 482 mM) of anhydrous MeOH were added to the reaction vessel and the mixture was vigorously shaken for 1 min. Finally 20.0  $\mu\text{mol}$  (20.0  $\mu\text{mol}$ , 37.7 mM, 7.78 eq.) of triethylborane (1 M in hexanes) was added to the reaction mixture. The reaction mixture was vigorously shaken for 1 min and then monitored by  $^1\text{H}$  and  $^{19}\text{F}$ -NMR.

General reaction using metal methoxide and substrate **5**:

In a borosilicate NMR tube 100  $\mu\text{mol}$  (22.6 eq., 244 mM) of the metal hydride was suspended in 350  $\mu\text{L}$  THF- $d^8$ . Then 10  $\mu\text{L}$  (246  $\mu\text{mol}$ , 55.6 eq., 600 mM) of anhydrous MeOH were added to the reaction vessel and the mixture was vigorously shaken for 1 min while hydrogen evolution was observed. After 5 min 50.0  $\mu\text{L}$  (4.43  $\mu\text{mol}$ , 10.8 mM, 1.00 eq.) of a stock solution (88.6 mM in cyclohexane) of **5** were added to the reaction mixture. In case of  $\text{CaH}_2$  the base was reacted for 18 h under inert conditions with the MeOH before the substrate was added to ensure the kinetically hampered formation of the alcoholate. The reaction mixture was vigorously shaken for 1 min and then monitored by  $^1\text{H}$  and  $^{19}\text{F}$ -NMR.

Procedure using triethylborane and substrate **5**:

In a borosilicate NMR tube 50.0  $\mu\text{L}$  (4.43  $\mu\text{mol}$ , 10.3 mM, 1.00 eq.) of a stock solution of **5** (88.6 mM in cyclohexane) have been suspended in 350  $\mu\text{L}$  MeCN- $d^3$ . Then 10.0  $\mu\text{L}$  (246  $\mu\text{mol}$ , 55.5 eq., 572 mM) of anhydrous MeOH were added to the reaction vessel and the mixture was vigorously shaken for 1 min. Finally, 20.0  $\mu\text{L}$  (20.0  $\mu\text{mol}$ , 46.5 mM, 4.51 eq.) of triethylborane (1 M in hexanes) was added to the reaction mixture. The reaction mixture was vigorously shaken for 1 min and then monitored by  $^1\text{H}$  and  $^{19}\text{F}$ -NMR.

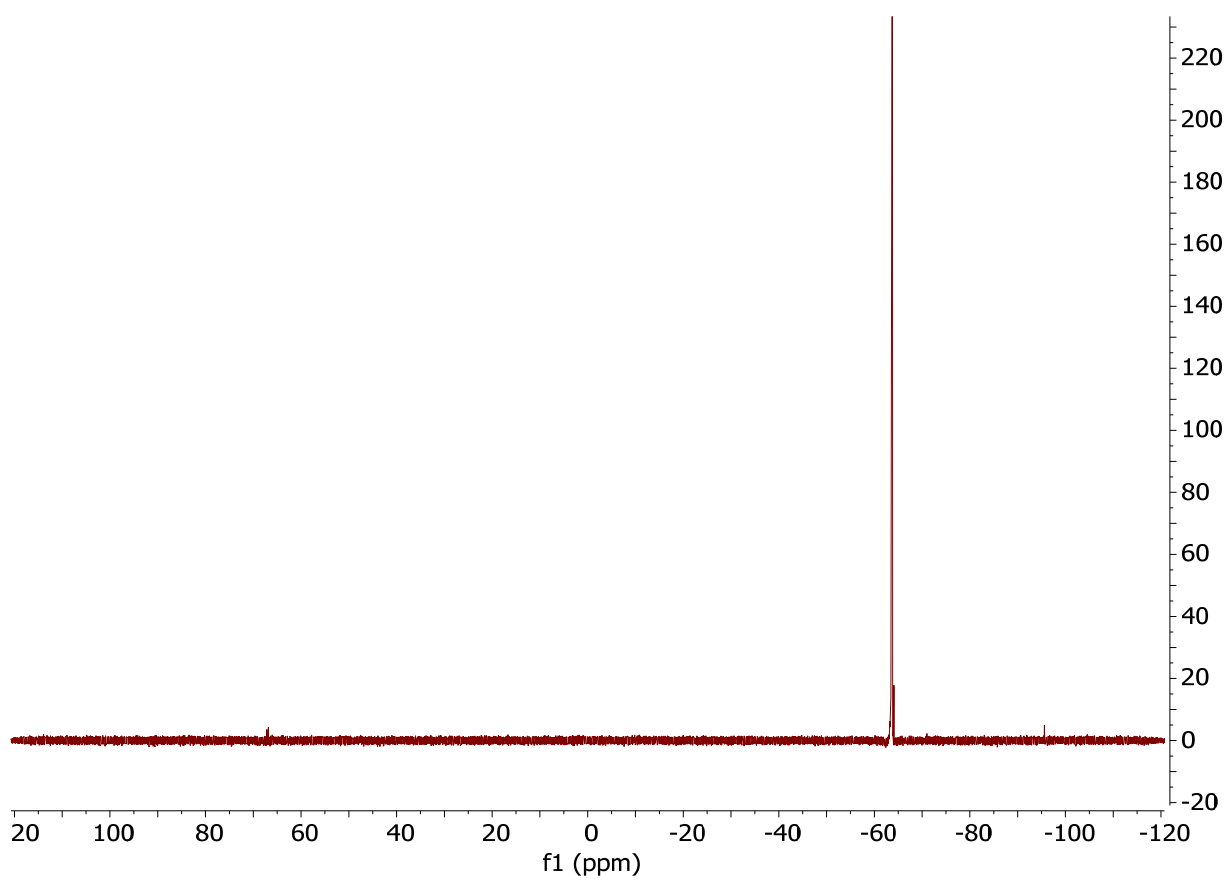

**Fig. S166**

$^{19}\text{F}$ -NMR spectra of the reaction of **4** with KOMe in THF- $\text{d}^8$  after 15 min. Full decomposition of the pentafluorosulfanyl substituent was indicated after 15 min.

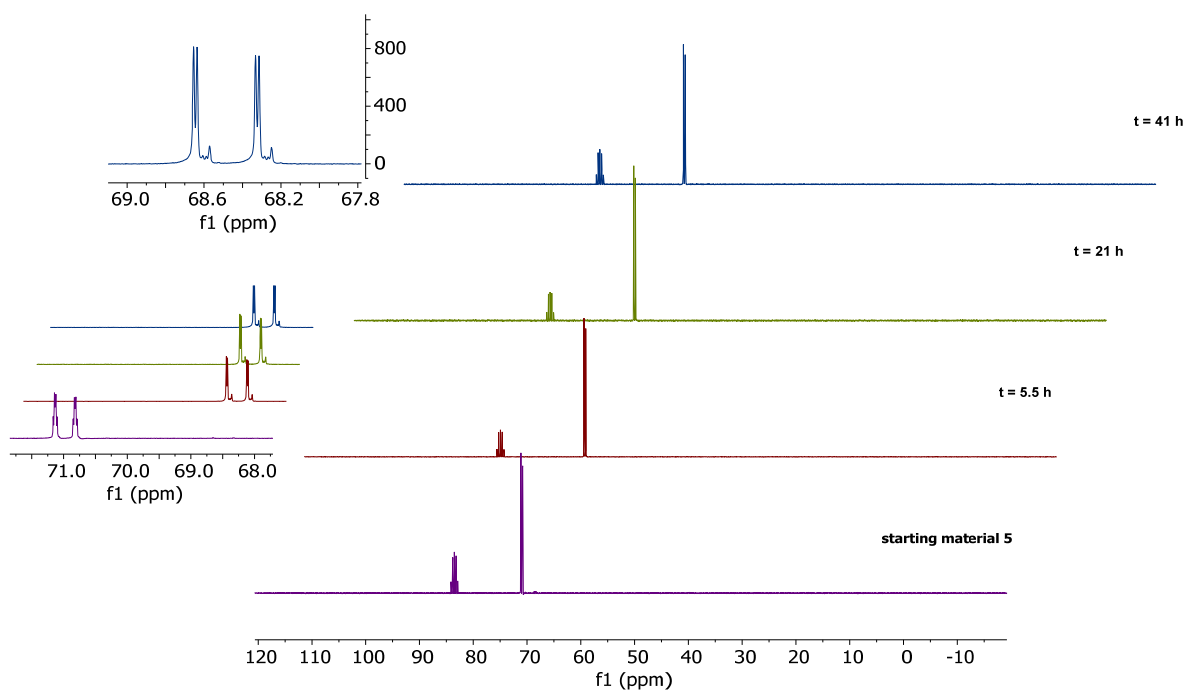

**Fig. S167**

Time resolved  $^{19}\text{F}$ -NMR spectra of the reaction of **5** with KOMe in  $\text{THF-d}^8$ .



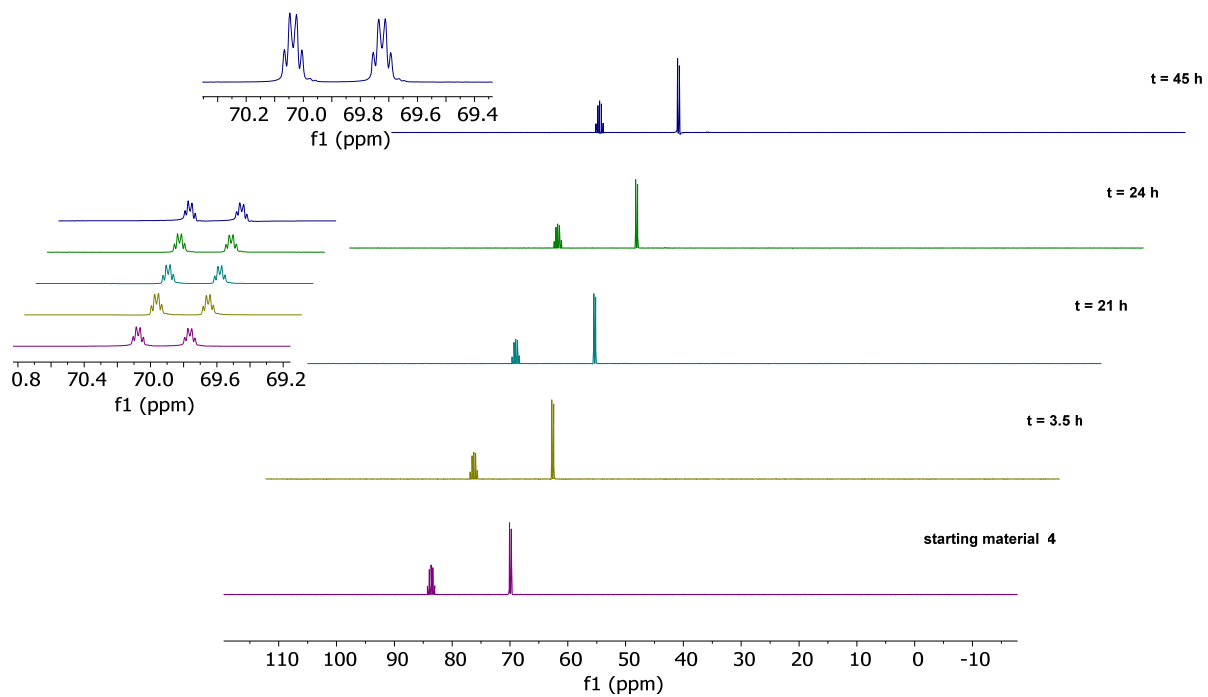

**Fig. S168**

Time resolved  $^{19}\text{F}$ -NMR spectra of the reaction of **4** with LiOMe in THF- $\text{d}^8$ .

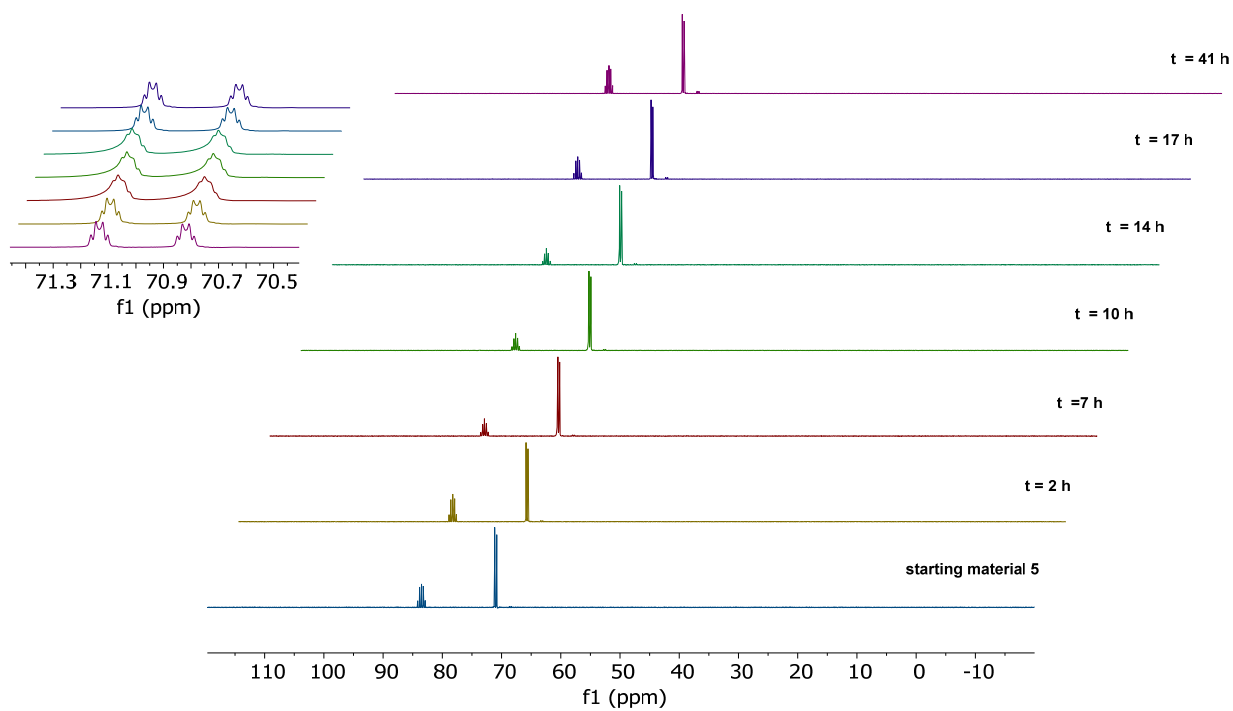

**Fig. S169**

Time resolved  $^{19}\text{F}$ -NMR spectra of the reaction of **5** with LiOMe in  $\text{THF-d}_8$ .

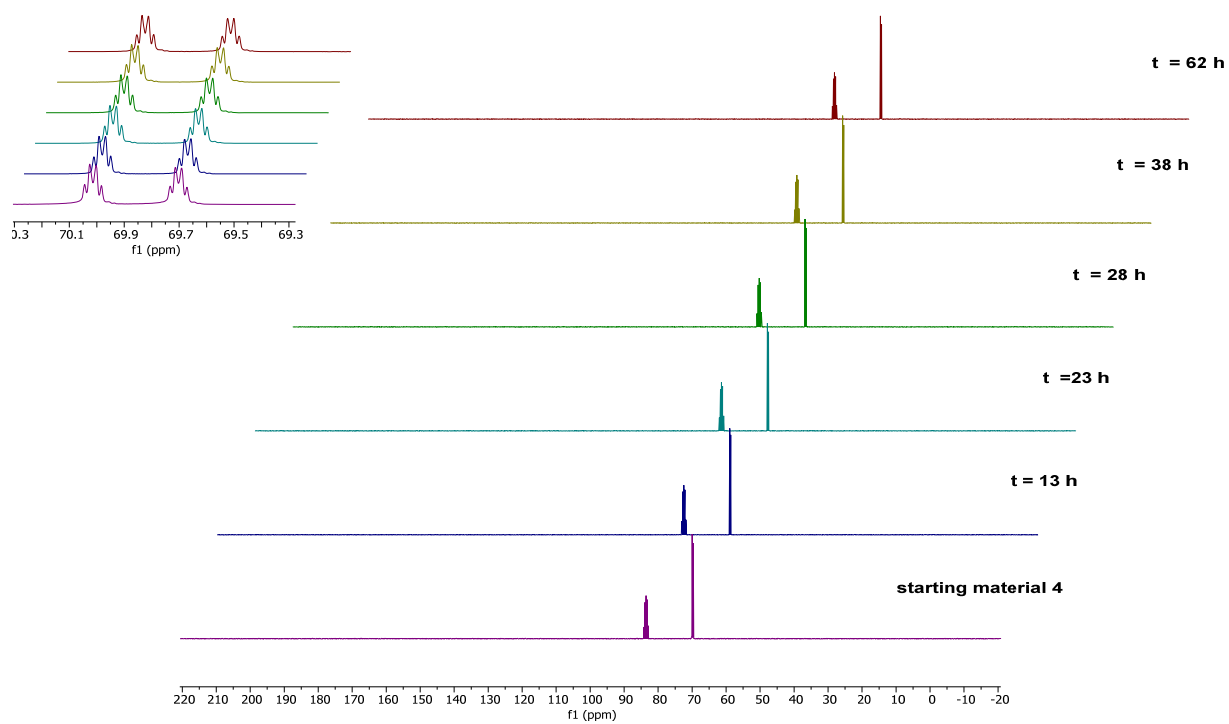

**Fig. S170**

Time resolved  $^{19}\text{F}$ -NMR spectra of the reaction of **4** with  $\text{CaH}_2$  in  $\text{THF-d}_8$ .

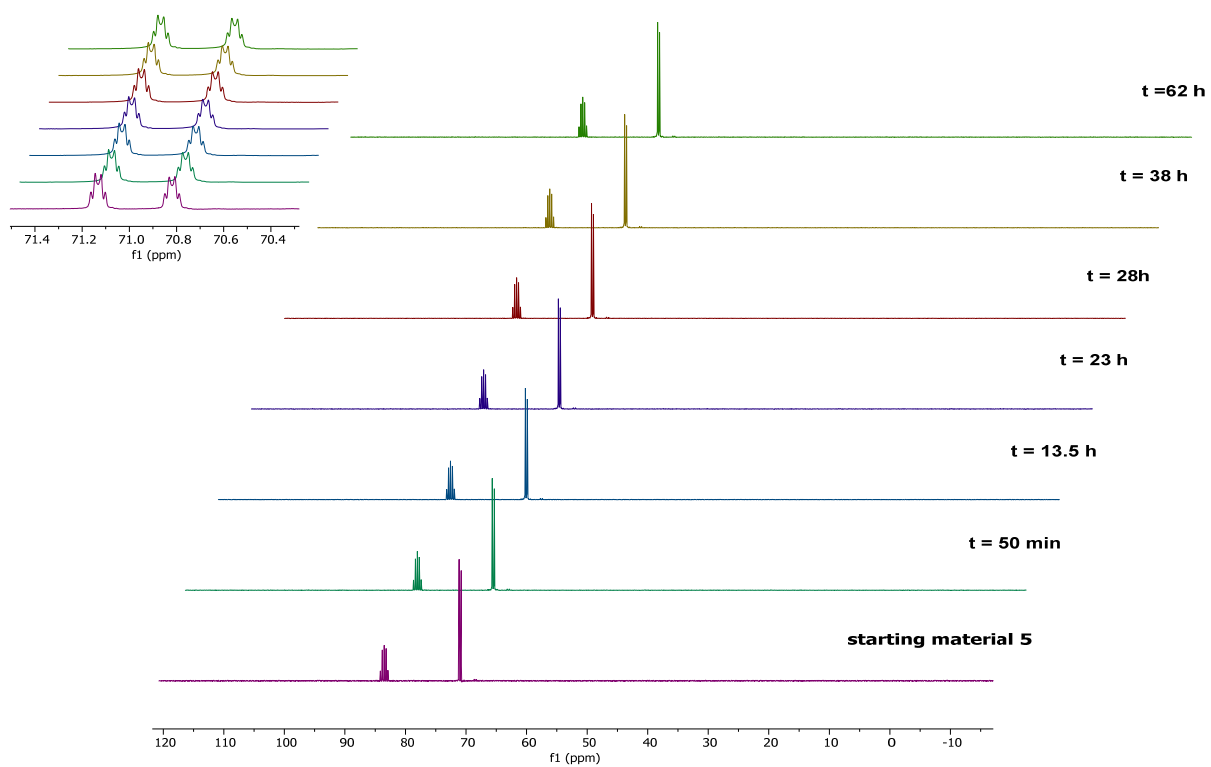

**Fig. S171**

Time resolved  $^{19}\text{F}$ -NMR spectra of the reaction of **5** with  $\text{CaH}_2$  in  $\text{THF-d}_8$ .

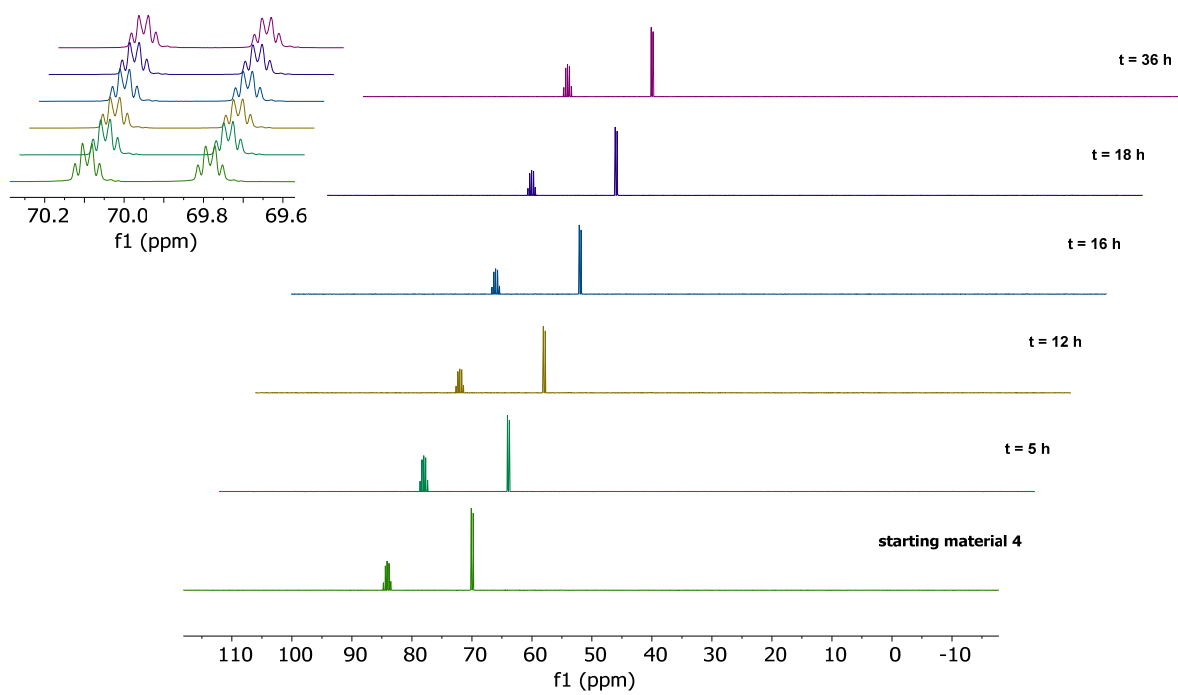

**Fig. S172**

Time resolved  $^{19}\text{F}$ -NMR spectra of the reaction of **4** with  $\text{BEt}_3$  and  $\text{MeOH}$  in  $\text{MeCN-d}_3$ .

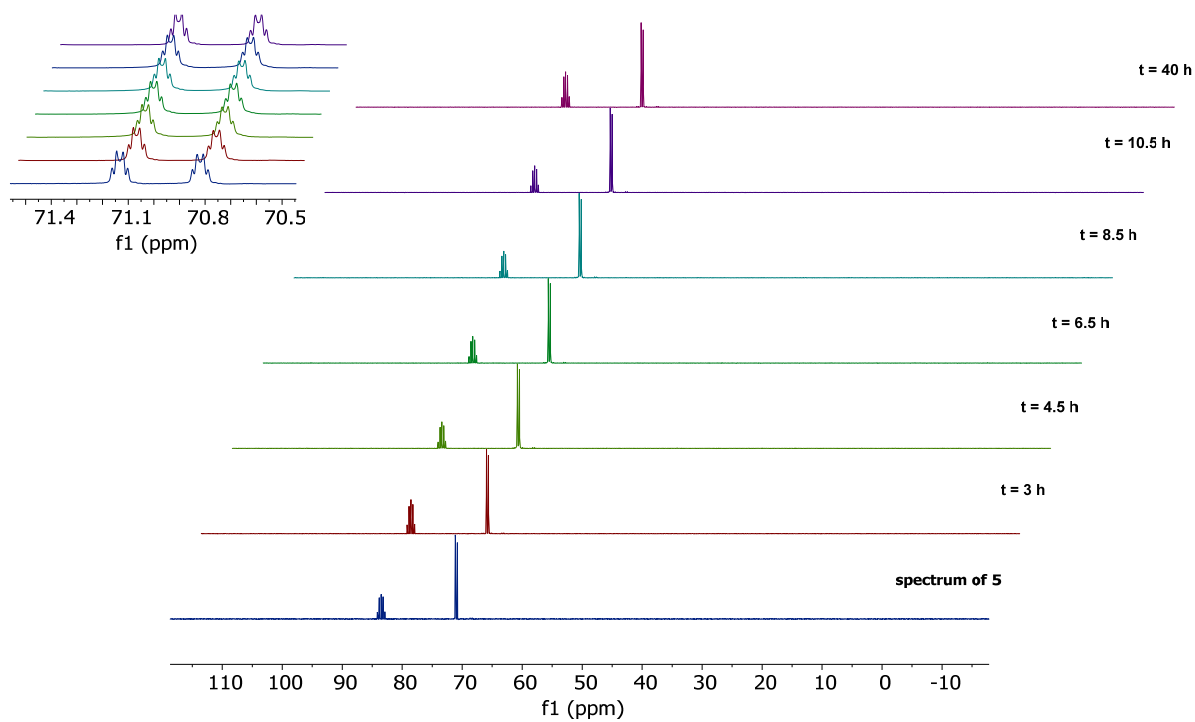

**Fig. S173**

Time resolved  $^{19}\text{F}$ -NMR spectra of the reaction of **5** with  $\text{BEt}_3$  and  $\text{MeOH}$  in  $\text{MeCN-d}_3$ .

## **References:**

- [S1]** G. R. Fulmer, A. J. M. Miller, N. H. Sherden, H. E. Gottlieb, A. Nudelman, B. M. Stoltz, J. E. Bercaw, K. I. Goldberg, *Organometallics* **2010**, 29 (9), 2176-2179.
- [S2]** O. V. Dolomanov, L. J. Bourhis, R. J. Gildea, J. A. K. Howard, H. Puschmann, *J. Appl. Cryst.* **2009**, 42, 339-341.
- [S3]** G.M. Sheldrick, *Acta Cryst.* **2015**, A71, 3-8.
- [S4]** G.M. Sheldrick, *Acta Cryst.* **2015**, C71, 3-8.
- (S5)** J. V. van der Waals, *Over de Continuïteit van den Gas- en Vloeistofoestand*. (Dissertation, Leiden, 1873).
- [S6]** R. C. Reid, J.M. Prausnitz, B. E. Poling (Eds.), *The Properties of Gases and Liquids* (Fourth Edition, McGraw-Hill, New York, 1987).
- [S7]** D. Rombach, H.-A. Wagenknecht, *ChemCatChem* **2018**, 10, 2955–2961.
- [S8]** F. Speck, D. Rombach, H.-A. Wagenknecht, *Beilstein J. Org. Chem.* **2019**, 15, 52–59.
